# Supplementary material for: How long are Ga⇆Ga double bonds and Ga–Ga single bonds in dicationic gallium dimers?
Source: Royal Society of Chemistry journal article supplement (doi:10.1039/d2cc06377h), 2022-12-20
Supplement: d2cc06377h1.pdf [file d2cc06377h1.pdf]

Electronic Supplementary Information to

# How Long are Ga $\leftrightarrow$ Ga Double Bonds and Ga–Ga Single Bonds in Dicationic Gallium Dimers?

M.Sc. Antoine Barthélemy,<sup>[a]</sup> Dr. Harald Scherer,<sup>[a]</sup> B.Sc. Hanna Weller,  
Prof. Dr. Ingo Krossing<sup>\*[a]</sup>

<sup>[a]</sup>Institut für Anorganische und Analytische Chemie and Freiburger Materialforschungszentrum (FMF), Universität Freiburg, Albertstr. 21, 79104 Freiburg, Germany. \*Correspondence to [krossing@uni-freiburg.de](mailto:krossing@uni-freiburg.de).

## Table of Contents

|     |                                                                                                              |    |
|-----|--------------------------------------------------------------------------------------------------------------|----|
| 1   | General Remarks .....                                                                                        | 1  |
| 1.1 | Single Crystal X-Ray Diffraction .....                                                                       | 2  |
| 1.2 | Powder Diffraction .....                                                                                     | 2  |
| 1.3 | NMR Spectroscopy .....                                                                                       | 3  |
| 1.4 | IR and Raman Spectroscopy .....                                                                              | 4  |
| 1.5 | Mass Spectrometry .....                                                                                      | 5  |
| 1.6 | Quantum Chemical Calculations .....                                                                          | 5  |
| 2   | Syntheses.....                                                                                               | 7  |
| 2.1 | Lithium $\beta$ -Diketimate (LiNacNac <sup>Mes</sup> ) .....                                                 | 7  |
| 2.2 | Hexaphenylcarbodiphosphorane (CDP <sup>Ph</sup> ).....                                                       | 8  |
| 2.3 | [{Ga(NacNac <sup>Mes</sup> ) <sub>2</sub> ][pf] <sub>2</sub> · 1.5oDFB ([1][pf] <sub>2</sub> · 1.5oDFB)..... | 8  |
| 2.4 | [{Ga(CDP <sup>Ph</sup> ) <sub>2</sub> ][pf] <sub>2</sub> ([2][pf] <sub>2</sub> ).....                        | 9  |
| 2.5 | [In(CDP <sup>Ph</sup> )][pf].....                                                                            | 9  |
| 3   | Crystal Structures .....                                                                                     | 10 |
| 3.1 | [{Ga(NacNac <sup>Mes</sup> ) <sub>2</sub> ][pf] <sub>2</sub> · 1.5oDFB ([1][pf] <sub>2</sub> · 1.5oDFB)..... | 11 |
| 3.2 | [{Ga(CDP <sup>Ph</sup> ) <sub>2</sub> ][pf] <sub>2</sub> ([2][pf] <sub>2</sub> ).....                        | 13 |
| 3.3 | [In(CDP <sup>Ph</sup> )][pf].....                                                                            | 15 |
| 4   | Powder Diffraction .....                                                                                     | 17 |
| 5   | NMR Spectroscopy .....                                                                                       | 19 |
| 5.1 | HNacNac <sup>Mes</sup> .....                                                                                 | 19 |
| 5.2 | LiNacNac <sup>Mes</sup> .....                                                                                | 21 |

|       |                                                                                                                       |     |
|-------|-----------------------------------------------------------------------------------------------------------------------|-----|
| 5.3   | $\{[Ga(NacNac^{Mes})_2][pf]_2 \cdot 1.5oDFB ([1][pf]_2 \cdot 1.5oDFB)\}$ .....                                        | 24  |
| 5.4   | $[Ph_3PCH_2PPh_3]Br_2$ .....                                                                                          | 29  |
| 5.5   | $CDP^{Ph}$ .....                                                                                                      | 31  |
| 5.6   | $\{[Ga(CDP^{Ph})_2][pf]_2 ([2][pf]_2)\}$ .....                                                                        | 33  |
| 5.7   | Formation of $[H(CDP^{Ph})]^+$ in Solution.....                                                                       | 39  |
| 5.8   | Comparison of NMR shifts and Coupling Constants in $CDP^{Ph}$ and $\{[Ga(CDP^{Ph})]_x\}^{x+}$ .....                   | 48  |
| 5.9   | DOSY Measurements.....                                                                                                | 49  |
| 6     | Vibrational Spectroscopy.....                                                                                         | 50  |
| 6.1   | $\{[Ga(NacNac^{Mes})_2][pf]_2 \cdot 1.5oDFB ([1][pf]_2 \cdot 1.5oDFB)\}$ .....                                        | 50  |
| 6.2   | $\{[Ga(CDP^{Ph})_2][pf]_2 ([2][pf]_2)\}$ .....                                                                        | 53  |
| 6.3   | $[In(CDP^{Ph})][pf]$ .....                                                                                            | 56  |
| 7     | Mass Spectrometry.....                                                                                                | 58  |
| 7.1   | $\{[Ga(NacNac^{Mes})_2][pf]_2 \cdot 1.5oDFB ([1][pf]_2 \cdot 1.5oDFB)\}$ .....                                        | 59  |
| 7.2   | $\{[Ga(CDP^{Ph})_2][pf]_2 ([2][pf]_2)\}$ .....                                                                        | 60  |
| 8     | Quantum Chemical Calculations.....                                                                                    | 61  |
| 8.1   | Dissociation of $\{[Ga(NacNac^{Mes})_2]^{2+} (1^{2+})$ and $\{[Ga(CDP^{Ph})_2]^{2+} (2^{2+})$ .....                   | 61  |
| 8.2   | Molecular orbitals of $1^{2+}$ and $2^{2+}$ .....                                                                     | 62  |
| 8.3   | EDA-NOCV Analysis.....                                                                                                | 63  |
| 8.3.1 | The Ga–Ga Bond in $\{[Ga(CDP^{Ph})_2]^{2+} (2^{2+})$ .....                                                            | 63  |
| 8.3.2 | The C–Ga Bond in $[Ga(CDP^{Ph})]^+$ .....                                                                             | 66  |
| 8.4   | Structure of $\{[Ga(CDP^{Ph})_2]^{2+}$ in the Gas Phase and in the Solid State.....                                   | 68  |
| 8.5   | $1^{2+}$ .....                                                                                                        | 69  |
| 8.6   | $[Ga(NacNac^{Mes})]^+$ .....                                                                                          | 77  |
| 8.7   | $2^{2+}$ (optimized in the gas phase).....                                                                            | 81  |
| 8.8   | $2^{2+}$ (positions of non-hydrogen atoms as found in the solid state structure; optimized positions of H atoms)..... | 111 |
| 8.9   | $[Ga(CDP^{Ph})]^+$ .....                                                                                              | 114 |
| 8.10  | $\{[In(CDP^{Ph})_2]^{2+}$ .....                                                                                       | 119 |
| 8.11  | $[In(CDP^{Ph})]^+$ .....                                                                                              | 130 |
| 8.12  | $[Ag(CDP^{Ph})]^+$ .....                                                                                              | 135 |
| 8.13  | $[(CDP^{Ph})Ag(CDP^{Ph})]^+$ .....                                                                                    | 141 |
| 8.14  | $[Al(OC(CF_3)_3)_4]^-$ .....                                                                                          | 151 |
| 8.15  | PhF.....                                                                                                              | 155 |
| 8.16  | $CDP^{Ph}$ .....                                                                                                      | 157 |
| 9     | References.....                                                                                                       | 163 |

# 1 General Remarks

All manipulations were carried out under exclusion of moisture and air through usage of a *MBraun* glovebox filled with nitrogen ( $O_2/H_2O < 1$  ppm) and standard Schlenk technique. All glassware used in reactions have been stored overnight in an oven at 180 °C and were additionally dried with a heat gun prior to usage.

All solvents were stored under an atmosphere of argon or nitrogen in sealed vessels. THF, Et<sub>2</sub>O, toluene and *n*-pentane were collected from a SPS, degassed and stored over activated molecular sieves. *Ortho*-difluorobenzene (*o*DFB) and fluorobenzene (PhF) were dried over CaH<sub>2</sub> for two days, distilled and degassed prior to use. The water content of the solvents was below 8 ppm, as determined by Carl Fischer titration.

Li[*pf*],<sup>[1]</sup> Ag[*pf*],<sup>[1,2]</sup> [Ga(PhF)<sub>2</sub>][*pf*] and [In(PhF)<sub>2</sub>][*pf*]<sup>[3]</sup> ([*pf*]<sup>-</sup> = [Al(OR<sup>F</sup>)<sub>4</sub>]<sup>-</sup>, R<sup>F</sup> = C(CF<sub>3</sub>)<sub>3</sub>)<sup>[4]</sup> were prepared according to literature protocols. Note that the number of fluorobenzene molecules coordinated to Ga<sup>+</sup> can vary, depending on the vacuum applied when drying the product. Thus, the formula [M(PhF)<sub>2</sub>][*pf*] (M Ga, In) is used for the sake of simplicity instead of [Ga(PhF)<sub>x</sub>][*pf*] (1 < x < 3). The exact ratio x was determined *via* <sup>19</sup>F NMR spectroscopy.

**Comment on the Absence of Elemental Analysis:** Due to the employed perfluorinated alkoxyaluminate anion in the compounds described herein elemental analysis has proven difficult in the past. Even with air-stable crystalline compounds (*e.g.* [NR<sub>4</sub>][*pf*], R = Et, Bu) the incomplete combustion of perfluorinated alkoxy groups does not lead to correct elemental analysis. The collected analytical data on [{Ga(NacNac<sup>Mes</sup>)<sub>2</sub>][*pf*]<sub>2</sub> · 1.5*o*DFB ([**1**][*pf*]<sub>2</sub> · 1.5*o*DFB) are shown herein and imply high bulk purity of the obtained samples. However, the match of the simulated and experimental powder diffractogram of [{Ga(CDP<sup>Ph</sup>)<sub>2</sub>][*pf*]<sub>2</sub> ([**2**][*pf*]<sub>2</sub>) is rather poor (section 4) and the NMR spectra reveal that protonated ligand [H–CDP<sup>Ph</sup>]<sup>+</sup> forms reproducibly in various organic solvents (section 5.7). Thus, we cannot exclude that the formation of [**2**][*pf*]<sub>2</sub> is accompanied by side products, due to the high reactivity of this compound. The reactivity of this compound and potential decomposition pathways are discussed in detail in section 5.7. Nevertheless, it is likewise conceivable that the isolated crystals are phase pure and that mechanical stress on the crystals prior to powder X-ray analysis resulted in a structural transformation, especially when taking into account the very weak Ga⇌Ga double bond. The amount of protonated ligand increases over time (**Figure S 44**), suggesting that the complex decomposition may only take place in solution.

## 1.1 Single Crystal X-Ray Diffraction

Crystals were obtained from *ortho*-difluorobenzene at  $-25\text{ }^{\circ}\text{C}$  (for  $[\mathbf{2}][pf]_2$  and  $[\text{In}(\text{CDP}^{\text{Ph}})][pf]$ ) or by layering a concentrated solution of the compounds in *o*DFB with *n*-pentane ( $[\mathbf{1}][pf]_2 \cdot 1.5o\text{DFB}$ ). Single crystal X-ray diffraction data for these compounds were collected from a shock-cooled single crystal at 100(2) K on a Bruker *D8 VENTURE* dual wavelength Mo/Cu three-circle diffractometer with a microfocus sealed X-ray tube using mirror optics as monochromator and a Bruker *PHOTON III* detector. Crystals were selected under perfluoropolyether oil, mounted on 0.1 to 0.2 mm diameter *CryoLoops* and quench-cooled using an *Oxford Cryostream 800* open flow  $\text{N}_2$  cooling device.<sup>[5]</sup> Data were collected at 100 K using monochromated Mo  $K_{\alpha}$  radiation ( $\lambda = 0.71073\text{ \AA}$ ).

All data were integrated with SAINT and a multi-scan absorption correction using SADABS was applied.<sup>[6]</sup> The structure was solved by direct methods using SHELXT and refined by full-matrix least-squares methods against  $F^2$  by SHELXL-2018/3<sup>[7]</sup> employing shelXle.<sup>[8]</sup> All non-hydrogen atoms were refined with anisotropic displacement parameters. The hydrogen atoms were refined isotropically on calculated positions using a riding model with their  $U_{\text{iso}}$  values constrained to 1.5 times the  $U_{\text{eq}}$  of their pivot atoms for terminal  $sp^3$  carbon atoms and 1.2 times for all other carbon atoms. Disordered moieties were refined using bond lengths restraints and displacement parameter restraints. Some parts of the disorder model were introduced by the program DSR.<sup>[9]</sup> Graphical representations were prepared using Olex2-1.3.<sup>[10]</sup>

Crystallographic data for the structure reported in this paper have been deposited with the Cambridge Crystallographic Data Centre.<sup>[11]</sup> CCDC 2220000, 2220001 and 2220002 contain the supplementary crystallographic data for this paper. Copies of the data can be obtained free of charge from the Cambridge Crystallographic Data Centre via [www.ccdc.cam.ac.uk/structures](http://www.ccdc.cam.ac.uk/structures). This report and the CIF file were generated using FinalCif.<sup>[12]</sup>

## 1.2 Powder Diffraction

The sample was triturated and then sealed with perfluoropolyalkylether oil (*AB128330*, *abcr* GmbH & Co. KG) in a 0.3 mm thick capillary (*Hilgenberg* GmbH, wall thickness 0.01 mm). The powder diffractogram was measured on a *STOE STADI P* powder diffractogram with a Ge(111) monochromator and a *Dectris MYTHEN 1K* detector at 100 K in the  $2\theta$  range  $2\text{-}40^{\circ}$ . Molybdenum  $K_{\alpha 1}$  radiation ( $\lambda = 0.709300\text{ \AA}$ ) was used. For data acquiring, processing and for spectrum simulation from the single crystal structure the software package *WinXPow* was employed.

### 1.3 NMR Spectroscopy

$^1\text{H}$ -,  $^{13}\text{C}$ -,  $^{19}\text{F}$ -,  $^{27}\text{Al}$ -,  $^{31}\text{P}$ -,  $^{71}\text{Ga}$  and 2D NMR spectra were detected on an *Avance DPX 200* (200 MHz), *Avance III HD* (300 MHz) and *Avance II+ 400* (400 MHz) NMR spectrometers from *Bruker*. NMR spectra were analyzed using *Bruker TopSpin 3.2*.  $^1\text{H}$  NMR chemical shifts are given with respect to tetramethylsilane (TMS). All  $^1\text{H}$  NMR spectra were calibrated using the solvent signal. The chemical shifts of standard solvents were taken from literature<sup>[13]</sup> and the shift of *o*DFB and PhF were determined experimentally by adding TMS to the aromatic solvent. The most intensive signal of the downfield multiplet of *o*DFB and PhF appears at 6.96 ppm and 6.9 ppm, respectively, when the signal of TMS is at 0.00 ppm (**Figure S 1** and **Figure S 2**).

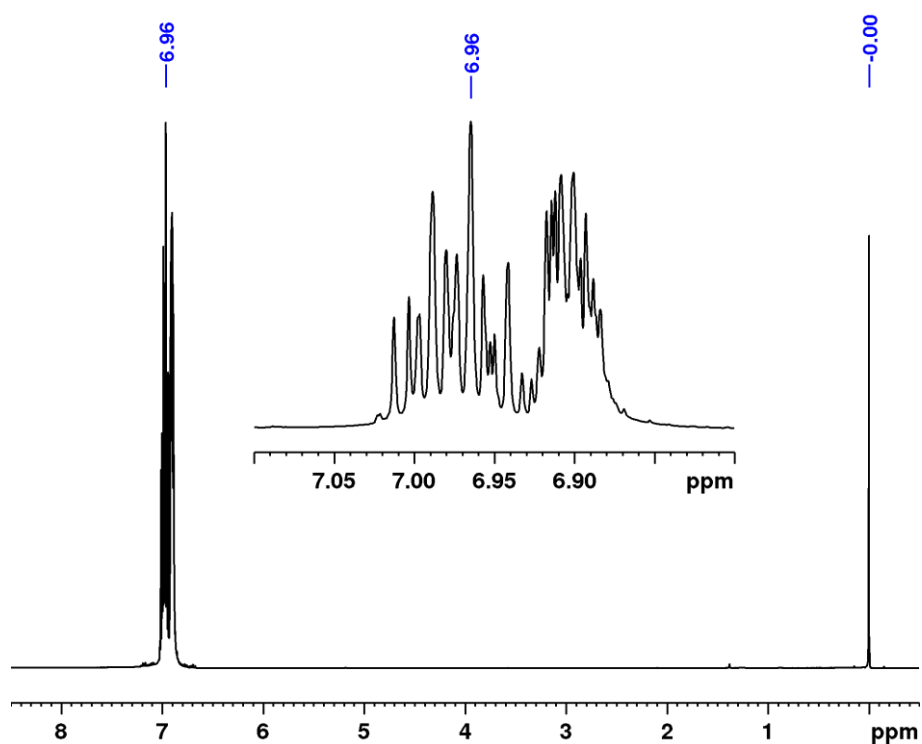

**Figure S 1:**  $^1\text{H}$  NMR spectrum (400.17 MHz, *o*DFB, 298 K) of TMS in *o*DFB.

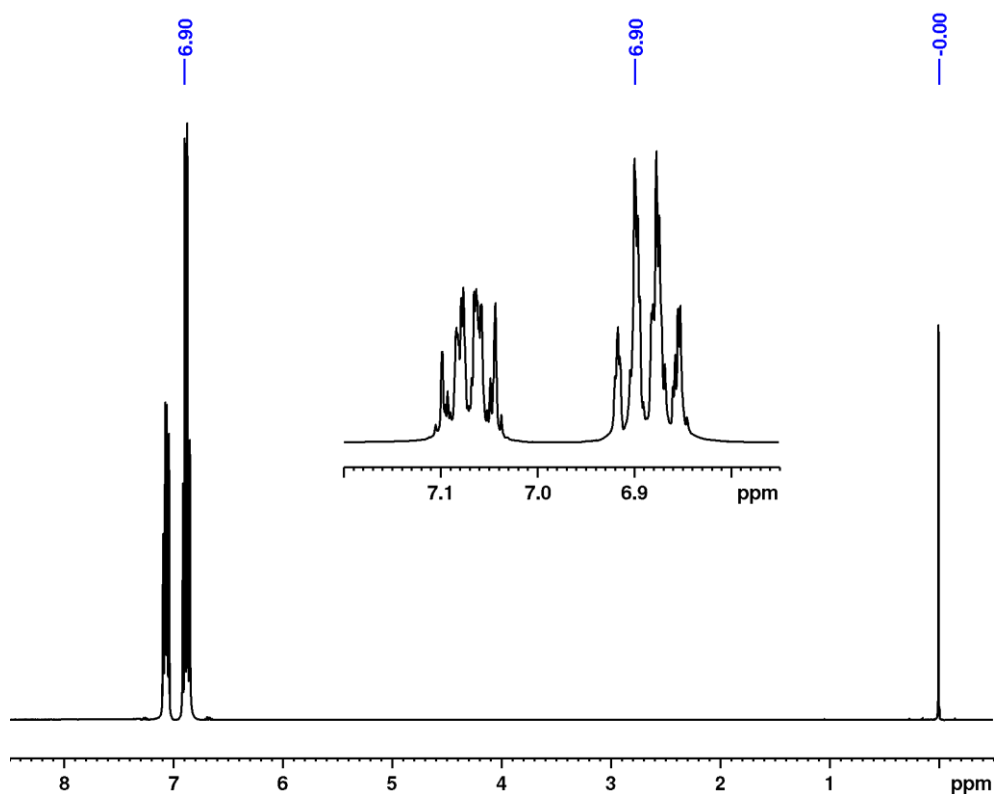

**Figure S 2:**  $^1\text{H}$  NMR spectrum (400.17 MHz, PhF, 298 K) of TMS in PhF.

Heteronuclear spectra were calibrated according to the IUPAC  $\chi$ -table.<sup>[14]</sup> Unless otherwise stated, the  $^{19}\text{F}$  and  $^{27}\text{Al}$  NMR spectra show signals at ca.  $-75$  ppm and  $35$  ppm, respectively, indicating the presence of non-decomposed  $[\text{Al}(\text{OR}^{\text{F}})_4]^-$  anion. The broad resonance between  $50$  and  $100$  ppm in the  $^{27}\text{Al}$  NMR spectra is caused by the probe head. For all reaction mixtures presented herein,  $^1\text{H}$ ,  $^{13}\text{C}$ ,  $^{19}\text{F}$ ,  $^{27}\text{Al}$ ,  $^{31}\text{P}$  (for  $[\mathbf{2}][\rho\text{f}]_2$ ),  $^{71}\text{Ga}$  and 2D correlated spectra, *e.g.*  $^1\text{H},^{13}\text{C}$  HSQC,  $^1\text{H},^{13}\text{C}$  HMBC or  $^1\text{H},^{31}\text{P}$  HMBC (for  $[\mathbf{2}][\rho\text{f}]_2$ ), were recorded.

#### 1.4 IR and Raman Spectroscopy

IR spectra FT-IR spectra were recorded on a *FT-IR Bruker Alpha*, equipped with a *Quick Snap Platinum ATR* (diamond or ZnSe crystal) unit inside a glove box under an atmosphere of nitrogen at room temperature (rt). The spectra were recorded with a resolution of  $2\text{ cm}^{-1}$  and 64 scans. For measurements and data processing, the software *OPUS 7.5* (Bruker Optic GmbH) was employed. All spectra were ATR corrected and base line corrections (5 cycles) were employed. By setting the most intense peak to 100 %, the other IR bands were given the following intensity assignment: very weak (vw) < 20 %, weak (w) < 40 %; medium (m) < 60 %, strong (s) < 80 % and very strong (vs) for  $\geq 80$  %.

Raman spectra were recorded on a Bruker Vertex 70 IR spectrometer equipped with a *Bruker RAM II FT* Raman module at rt in the range of 4000–50 cm<sup>-1</sup> with a resolution of 4 cm<sup>-1</sup>. For data processing, the software *OPUS 7.5* (Bruker Optic GmbH) was employed. All spectra were base line corrected (5 cycles). By setting the most intense peak to 100 %, the other Raman bands were given the following intensity assignment: very weak (vw) < 20 %, weak (w) < 40 %; medium (m) < 60 %, strong (s) < 80 % and very strong (vs) for ≥ 80 %.

## 1.5 Mass Spectrometry

The mass spectrometric experiments were performed with a Thermo-Fischer LTQ XL linear ion-trap mass spectrometer equipped with an electrospray ionization (ESI) source. Mass spectra were obtained by electrospray ionization from millimolar solutions in oDFB. The solutions were cooled to ca. -30 °C. In order to avoid decomposition, the so-called “pressurized sample infusion” technique described by McIndoe and co-workers was employed.<sup>[15]</sup> Therefore, the solution was cooled to -30 °C, prior to injection into the ESI source. Instead of PEEK tubing, a very thin and short silica capillary was used. The capillary temperature was adjusted to 60 °C. Nitrogen was used as a sheath, sweep, and auxiliary gas. Data were processed with the *Thermo XCalibur* software.

## 1.6 Quantum Chemical Calculations

Unless stated otherwise, quantum chemical calculations were performed with *Turbomole* (version 7.2 or 7.5).<sup>[16,17]</sup> Structures were optimized using density functional theory (DFT),<sup>[16]</sup> internal coordinates, resolution of identity-approximation (RI),<sup>[18,19]</sup> D3(BJ)-dispersion correction<sup>[20]</sup> and a fine integration gridsize (gridsize = m5). Calculations were performed on the RI-BP86<sup>[21]</sup>(D3BJ)/def2-TZVPP<sup>[22]</sup>, RI-BP86(D3BJ)/def2-SVP<sup>[18,22]</sup> or RI-PBEh-3c(D3BJ)/def2-mSVP<sup>[23]</sup> level of theory. For species containing indium atoms, an effective core potential (ECP), *i.e.* def2-ECP,<sup>[22]</sup> was employed. Thermal and entropic contributions to the Gibbs energy were calculated without scaling factor at standard conditions (298.15 K, 0.1 MPa) with the FREEH module. Every species presented herein were checked in terms of reasonable geometry and electronic occupation with the EIGER module. Vibrational analyses were performed with the AOFORCE module, in order to detect imaginary frequencies.<sup>[24]</sup> To counteract imaginary frequencies, the convergence criteria for geometry optimization were modified from the default 10<sup>-7</sup> H (energy) and 10<sup>-4</sup> a.u. (gradient) to 10<sup>-8</sup> H and 10<sup>-5</sup> a.u., respectively. The coordinates of the herein investigated compounds are listed in section 8.5–8.16.

For each molecular species, the standard enthalpy  $H^\circ$  at 298.15 K and 0.1 MPa was calculated from the electronic SCF energy  $E_{\text{SCF}}$  and the sum of translational, rotational, and vibrational energy including zero-point energy  $E_{\text{vrt}}$  (FREEH energy) using the following equation:

$$H^\circ = E_{\text{SCF}} + E_{\text{vrt}} + R \cdot T \quad (1)$$

$E_{\text{SCF}}$ : electronic SCF energy

$E_{\text{vrt}}$ : sum of translational, rotational, and vibrational energy including zero-point energy

R: universal gas constant (8.314 J K<sup>-1</sup> mol<sup>-1</sup>)

T: temperature in Kelvin (298.15 K)

The Gibbs free energy  $G^\circ$  follows from the standard enthalpy  $H^\circ$  and the standard entropy  $S^\circ$ :

$$G^\circ = H^\circ - S^\circ \cdot T \quad (2)$$

Solvation effects were incorporated using the conductor like screening model (COSMO)<sup>[25]</sup> for *o*DFB as the solvent. A dielectric constant of 13.38 D at 298 K was assumed for this solvent.<sup>[26]</sup> Single point calculations were performed on the optimized gas phase structures and the results from the vibrational analysis were taken from the respective gas phase calculations.



## 2 Syntheses

### 2.1 Lithium $\beta$ -Diketiminato (LiNacNac<sup>Mes</sup>)

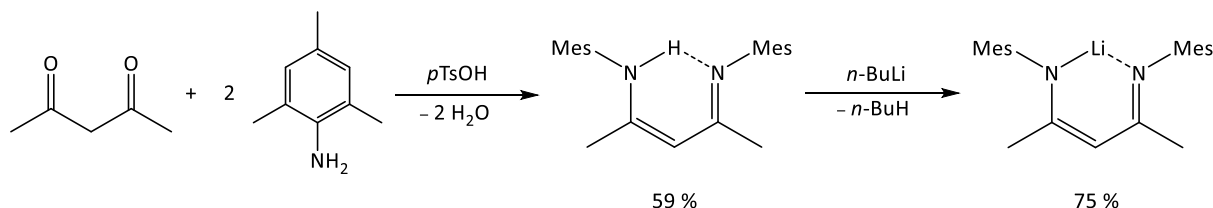

**Scheme S 1:** Synthesis of LiNacNac<sup>Mes</sup> via HNacNac<sup>Mes</sup>. Only the enamine form of protonated HNacNac<sup>Mes</sup> is shown since this is the predominant tautomer in solution.

NacNacLi was synthesized according to literature procedure<sup>[27]</sup> in two step synthesis. *p*-Toluenesulfonic acid monohydrate (11.4 g, 59.8 mmol, 1.0 eq.) was suspended in toluene (180 mL). Pentane-2,4-dione (6.10 mL, 5.95 g, 59.4 mmol, 1.0 eq.) and 2,4,6-trimethylaniline (17.0 mL, 16.4 g, 121 mmol, 2.0 eq.) were added. The reaction mixture was heated at reflux for 3 h. Water (ca. 2.5 mL) formed in the reaction was removed with a Dean-Stark apparatus. The following purification was carried out in air. The suspension was filtrated, and the solid residue was dried. The crude product was dissolved in dichloromethane (180 mL). The solution was stirred with saturated, aqueous Na<sub>2</sub>CO<sub>3</sub> solution (79.0 mL, 7.56 g, 90.0 mmol, 1.5 eq.) for 2 h. The organic phase was separated, dried over MgSO<sub>4</sub> and then concentrated to an orange oil under reduced pressure. After adding methanol (100 mL), the solution was stored at -40 °C overnight. The solid was filtrated and washed with cold methanol (100 mL). Removal of the volatiles *in vacuo* (1×10<sup>-3</sup> mbar) afforded HNacNac<sup>Mes</sup> (11.6 g, 34.8 mmol, 59 %) as a light-yellow powder.

HNacNac<sup>Mes</sup> (2.90 g, 8.67 mmol, 1.0 eq.) was suspended in *n*-hexane. A solution of *n*-butyllithium in *n*-hexane (6.0 mL, 1.6 M, 9.6 mmol, 1.1 eq.) was added dropwise at -20 °C. The reaction mixture was slowly warmed to room rt, stirred for 15 h and stored at -40 °C overnight, yielding a yellow solution with a colourless precipitate. The solid was filtrated, washed with *n*-hexane (3×4 mL) and removal of the volatiles *in vacuo* (1×10<sup>-3</sup> mbar) afforded LiNacNac<sup>Mes</sup> as a light-yellow powder. The remaining filtrate was concentrated in vacuo to 10 mL and stored at -40 °C again. Filtration and removal of the volatiles *in vacuo* (1×10<sup>-3</sup> mbar) yielded a second batch of the product (total: 2.21 g, 6.49 mmol, 75 %).

## 2.2 Hexaphenylcarbodiphosphorane (CDP<sup>Ph</sup>)

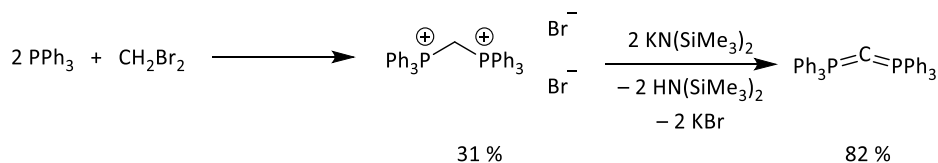

**Scheme S 2:** Synthesis of CDP<sup>Ph</sup> via the respective bisphosphonium bromide.

The bisphosphonium bromide was synthesized according to a modified literature procedure.<sup>[28]</sup> Methylene bromide (2.10 ml, 5.22 g, 30.0 mmol, 1.0 eq.) was added to a stirred solution of triphenylphosphine (15.8 g, 60.4 mmol, 2.0 eq.) in molten triphenylphosphate (13.0 g, 40 mmol) at 90 °C. The mixture was heated for 24 h at 110 °C and then for further 6 h at 150 °C. After the reaction mixture was allowed to cool down to 100 °C, benzene (200 ml) was added and the yellow suspension was refluxed for additional 1 h at 100 °C. The following purification was carried out in air. The suspension was then filtered, the solid residue was washed with benzene (40 ml) and volatiles were removed *in vacuo*. The product was purified by precipitating it twice from hot methanol (100 ml) by adding EtOAc (900 ml). Drying the obtained solid at 100 °C *in vacuo* for ca. 8 h afforded bisphosphonium salt [Ph<sub>3</sub>P–CH<sub>2</sub>–PPh<sub>3</sub>]<sup>+</sup>Br<sub>2</sub><sup>–</sup> as a hygroscopic white powder (6.51 g, 9.32 mmol, 31 %).

Hexaphenylcarbodiphosphorane was synthesized according to a modified literature procedure.<sup>[29]</sup> Bisphosphonium salt [Ph<sub>3</sub>P–CH<sub>2</sub>–PPh<sub>3</sub>]<sup>+</sup>Br<sub>2</sub><sup>–</sup> (4.03 g, 5.77 mmol, 1.0 eq.) and KHMDs (2.74 g, 13.7 mmol, 2.4 eq.) were suspended in THF (ca. 60 ml). The reaction solution immediately turned yellow and was stirred for 3 h at rt. The suspension was allowed to cool down to rt, filtered under argon and the solvent removed *in vacuo*. Purification was achieved by washing the crude reaction product with Et<sub>2</sub>O (3×8 ml) and pentane (3×20 ml). The residue was filtered and dried *in vacuo* to obtain hexaphenylcarbodiphosphorane Ph<sub>3</sub>P=C=PPh<sub>3</sub> (2.53 g, 4.71 mmol, 82 %) as a bright yellow, moisture sensitive powder.

## 2.3 [{Ga(NacNac<sup>Mes</sup>)<sub>2</sub>][pf]<sub>2</sub> · 1.5oDFB} ([1][pf]<sub>2</sub> · 1.5oDFB)

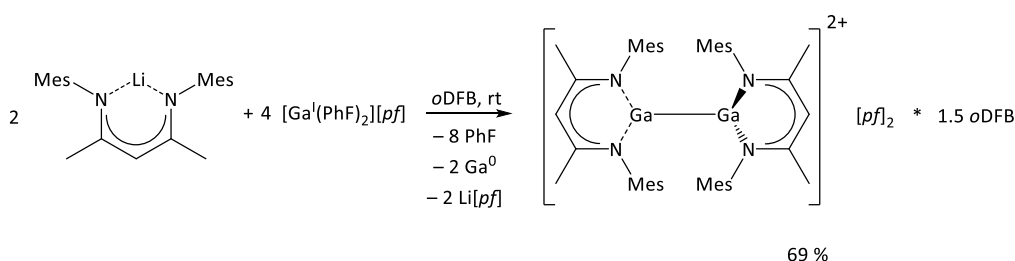

**Scheme S 3:** Synthesis of [1][pf]<sub>2</sub> · 1.5oDFB starting from [Ga(PhF)<sub>x</sub>][pf] and LiNacNac<sup>Mes</sup>.

[Ga(PhF)<sub>x</sub>][pf] (150 mg, 124 μmol (for x = 1.8), 2.0 eq.) and LiNacNac<sup>Mes</sup> (21.1 mg, 62.0 μmol, 1.0 eq.) were dissolved in oDFB (1.1 mL) at rt, yielding a dark solution with a black precipitate. After filtration, a yellow solution was obtained. Layering the solution with *n*-pentane and removal of the volatiles *in vacuo* afforded yellow crystals of [{Ga<sup>II</sup>(NacNac<sup>Mes</sup>)<sub>2</sub>][pf]<sub>2</sub> · 1.5oDFB ([1][pf]<sub>2</sub> · 1.5oDFB; 62.6 mg, 21.5 μmol, 69 %).

## 2.4 [{Ga(CDP<sup>Ph</sup>)<sub>2</sub>][pf]<sub>2</sub> ([2][pf]<sub>2</sub>)

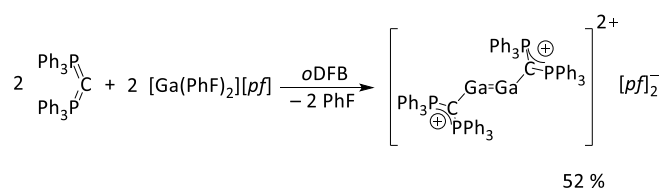

**Scheme S 4:** Synthesis of [2][pf]<sub>2</sub> starting from [Ga(PhF)<sub>2</sub>][pf] and CDP<sup>Ph</sup>.

In a typical crystallization attempt, [Ga(PhF)<sub>x</sub>][pf] (200 mg, 177 μmol (for x = 1.0), 1.0 eq.) and CDP<sup>Ph</sup> (104 mg, 194 μmol, 1.1 eq.) were mixed in oDFB (1.7 ml) at rt. The solution was concentrated under reduced pressure and then stored at -25°C. After one week, orange-brown crystals were obtained and the solvent was filtered off. Drying the crystals *in vacuo* afforded [{Ga(CDP<sup>Ph</sup>)<sub>2</sub>][pf]<sub>2</sub> as a highly air and moisture sensitive brown solid [(2)[pf]<sub>2</sub>; 146 mg, 46.4 μmol, 52 % (under the simplifying assumption that no [(CDP<sup>Ph</sup>)H][pf] is present in the solid)].

## 2.5 [In(CDP<sup>Ph</sup>)][pf]

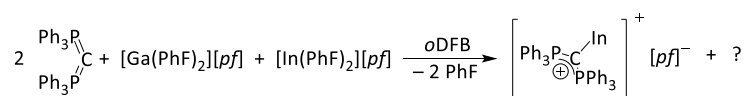

**Figure S 3:** Synthesis of [In(CDP<sup>Ph</sup>)][pf] starting from [In(PhF)<sub>2</sub>][pf], [Ga(PhF)<sub>2</sub>][pf] and CDP<sup>Ph</sup>.

[In(PhF)<sub>x</sub>][pf] (46.0 mg, 36.0 μmol (x = 2.5), 1.1 eq.), [Ga(PhF)<sub>x</sub>][pf] (38.0 mg, 33.6 μmol (x = 1.0), 1.0 eq.) and CDP<sup>Ph</sup> (36.0 mg, 67.1 μmol, 2.0 eq.) were dissolved in oDFB (0.8 ml) and stirred overnight. A metallic precipitate was observed and light grey crystals were obtained from the brown solution. The yield could not be determined, since most of the crystals were used for the scXRD and Raman measurements. The synthesis could not be reproduced and mixing [In(PhF)<sub>x</sub>][pf] and CDP<sup>Ph</sup>, even at -40 °C, merely led to precipitation of elemental indium.

### 3 Crystal Structures

**Table S 1:** Crystal data and summary of the data collection and refinement for  $\{[\text{Ga}(\text{NacNac}^{\text{Mes}})]_2\}[\text{pf}]_2 \cdot 1.5\text{oDFB}$  ( $[\text{1}][\text{pf}]_2 \cdot 1.5\text{oDFB}$ ),  $\{[\text{Ga}(\text{CDP}^{\text{Ph}})]_2\}[\text{pf}]_2$  ( $[\text{2}][\text{pf}]_2$ ) and  $[\text{In}(\text{CDP}^{\text{Ph}})][\text{pf}]$ .

| CCDC                                      | 2220000                                                                                   | 2220001                                                                              | 2220002                                                           |
|-------------------------------------------|-------------------------------------------------------------------------------------------|--------------------------------------------------------------------------------------|-------------------------------------------------------------------|
| Empirical formula                         | $\text{C}_{174}\text{H}_{128}\text{Al}_4\text{F}_{150}\text{Ga}_4\text{N}_8\text{O}_{16}$ | $\text{C}_{106}\text{H}_{60}\text{Al}_2\text{F}_{72}\text{Ga}_2\text{O}_8\text{P}_4$ | $\text{C}_{53}\text{H}_{30}\text{AlF}_{36}\text{InO}_4\text{P}_2$ |
| Formula weight                            | 5823.65                                                                                   | 3146.82                                                                              | 1618.51                                                           |
| Temperature [K]                           | 100(2)                                                                                    | 100(2)                                                                               | 100(2)                                                            |
| Crystal system                            | triclinic                                                                                 | monoclinic                                                                           | triclinic                                                         |
| Space group (number)                      | $P\bar{1}$ (2)                                                                            | $P2_1/c$ (14)                                                                        | $P\bar{1}$ (2)                                                    |
| a [Å]                                     | 18.321(8)                                                                                 | 15.9476(12)                                                                          | 11.504(6)                                                         |
| b [Å]                                     | 19.089(9)                                                                                 | 11.0312(8)                                                                           | 15.151(5)                                                         |
| c [Å]                                     | 30.659(14)                                                                                | 33.773(3)                                                                            | 17.514(7)                                                         |
| $\alpha$ [Å]                              | 88.15(2)                                                                                  | 90                                                                                   | 84.274(8)                                                         |
| $\beta$ [Å]                               | 87.32(3)                                                                                  | 102.211(2)                                                                           | 79.771(12)                                                        |
| $\gamma$ [Å]                              | 88.370(13)                                                                                | 90                                                                                   | 84.889(14)                                                        |
| Volume [Å <sup>3</sup> ]                  | 10701(9)                                                                                  | 5807.0(7)                                                                            | 2981(2)                                                           |
| Z                                         | 2                                                                                         | 2                                                                                    | 2                                                                 |
| $\rho_{\text{calc}}$ [g/cm <sup>3</sup> ] | 1.807                                                                                     | 1.800                                                                                | 1.803                                                             |
| $\mu$ [mm <sup>-1</sup> ]                 | 0.706                                                                                     | 0.707                                                                                | 0.623                                                             |
| F(000)                                    | 5764                                                                                      | 3112                                                                                 | 1592                                                              |
| Crystal size [mm <sup>3</sup> ]           | 0.491×0.386×0.216                                                                         | 0.36×0.28×0.21                                                                       | 0.26×0.22×0.08                                                    |
| Crystal colour                            | yellow                                                                                    | orange                                                                               | colourless                                                        |
| Crystal shape                             | block                                                                                     | block                                                                                | block                                                             |
| Radiation                                 | $\text{MoK}\alpha$ ( $\lambda=0.71073$ Å)                                                 | $\text{MoK}\alpha$ ( $\lambda=0.71073$ Å)                                            | $\text{MoK}\alpha$ ( $\lambda=0.71073$ Å)                         |
| 2 $\theta$ range [°]                      | 2.55 to 63.17 (0.68 Å)                                                                    | 2.61 to 61.11 (0.70 Å)                                                               | 2.71 to 62.11 (0.69 Å)                                            |
| Index ranges                              | $-26 \leq h \leq 26$                                                                      | $-22 \leq h \leq 22$                                                                 | $-16 \leq h \leq 16$                                              |
|                                           | $-28 \leq k \leq 28$                                                                      | $-15 \leq k \leq 15$                                                                 | $-21 \leq k \leq 21$                                              |
|                                           | $-45 \leq l \leq 45$                                                                      | $-48 \leq l \leq 48$                                                                 | $-25 \leq l \leq 25$                                              |
| Reflections collected                     | 347634                                                                                    | 348234                                                                               | 168242                                                            |
| Independent reflections                   | 71603                                                                                     | 17782                                                                                | 19043                                                             |
|                                           | $R_{\text{int}} = 0.0355$<br>$R_{\text{sigma}} = 0.0331$                                  | $R_{\text{int}} = 0.0279$<br>$R_{\text{sigma}} = 0.0097$                             | $R_{\text{int}} = 0.0562$<br>$R_{\text{sigma}} = 0.0291$          |
| Completeness to $\theta = 25.242^\circ$   | 100.0 %                                                                                   | 100.0 %                                                                              | 99.7 %                                                            |
| Data / Restraints / Parameters            | 71603/124253/4964                                                                         | 17782/4516/1001                                                                      | 19043/4540/1001                                                   |
| Goodness-of-fit on $F^2$                  | 1.031                                                                                     | 1.042                                                                                | 1.022                                                             |
| Final R indexes [ $l \geq 2\sigma(l)$ ]   | $R_1 = 0.0501$                                                                            | $R_1 = 0.0281$                                                                       | $R_1 = 0.0442$                                                    |
|                                           | $wR_2 = 0.1310$                                                                           | $wR_2 = 0.0746$                                                                      | $wR_2 = 0.1296$                                                   |
| Final R indexes [all data]                | $R_1 = 0.0714$                                                                            | $R_1 = 0.0292$                                                                       | $R_1 = 0.0559$                                                    |
|                                           | $wR_2 = 0.1461$                                                                           | $wR_2 = 0.0754$                                                                      | $wR_2 = 0.1388$                                                   |
| Largest peak/hole [eÅ <sup>3</sup> ]      | 1.14/-0.67                                                                                | 0.70/-0.41                                                                           | 0.70/-2.47                                                        |

### 3.1 $\{[\text{Ga}(\text{NacNac}^{\text{Mes}})]_2[\text{pf}]_2 \cdot 1.5\text{oDFB} ([1][\text{pf}]_2 \cdot 1.5\text{oDFB})\}$

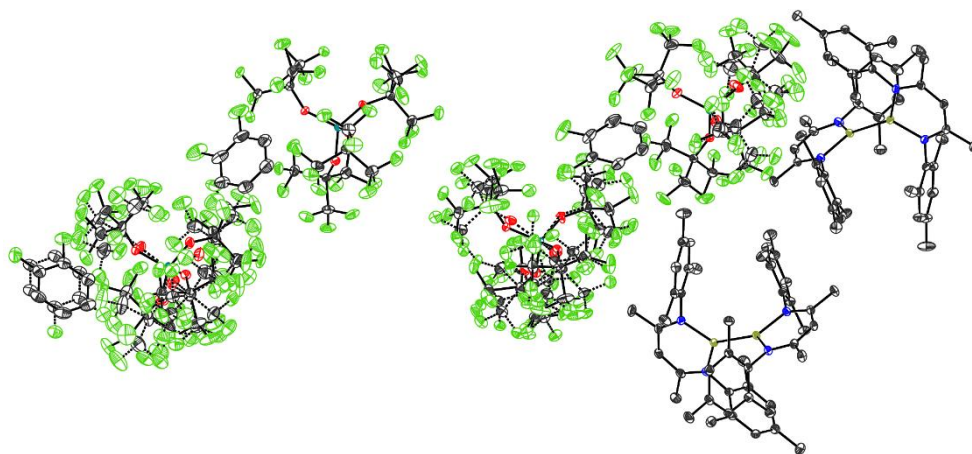

**Figure S 4:** Molecular structure of  $[1][\text{pf}]_2 \cdot 1.5\text{oDFB}$  in the solid state from scXRD. Hydrogen atoms are omitted for clarity, the disorder in the  $[\text{pf}]^-$  anions is shown. Thermal ellipsoids are set at 50 % probability level.

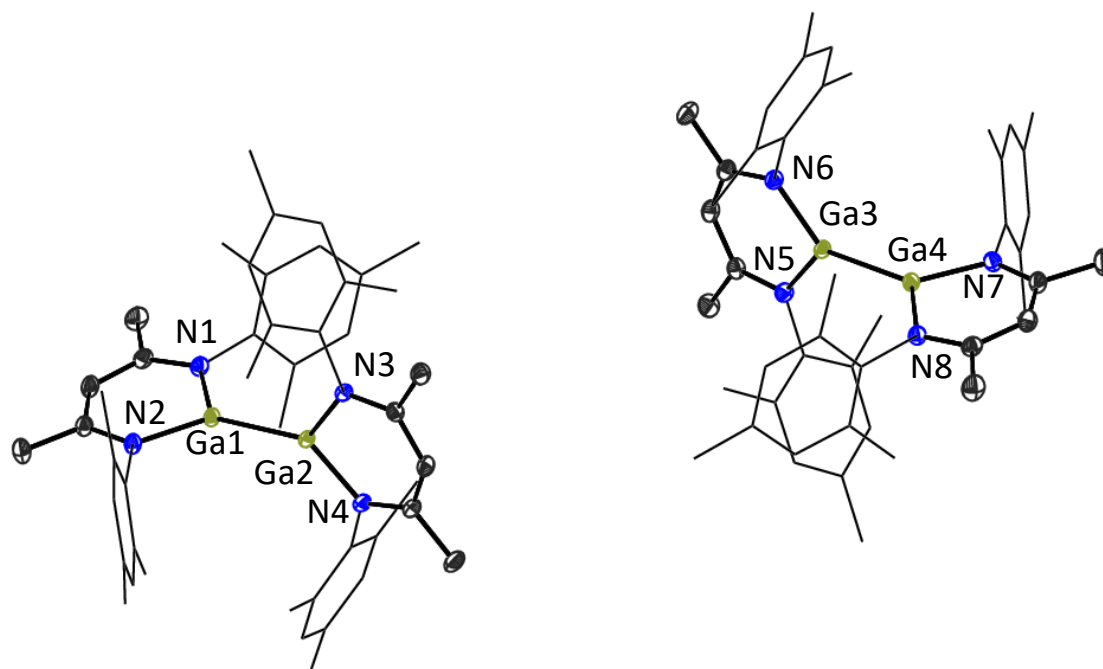

**Figure S 5:** Molecular structure of the two crystallographically independent  $1^{2+}$  units in  $[1][\text{pf}]_2 \cdot 1.5\text{oDFB}$ . The NacNac–Ga–Ga–NacNac–backbone is highlighted and the mesityl groups are shown as a wireframe model. Hydrogen atoms and anions are omitted for clarity. Thermal ellipsoids are set at 50 % probability level.

**Table S 2:** Selected bond lengths in [1][pf]<sub>2</sub> · 1.5oDFB.

| Atom–Atom | Bond Length [pm] |
|-----------|------------------|
| Ga1–N1    | 184.70(17)       |
| Ga1–N2    | 184.56(16)       |
| Ga1–Ga2   | 238.11(9)        |
| Ga2–N3    | 184.61(18)       |
| Ga2–N4    | 184.91(17)       |
| Ga3–N5    | 184.56(18)       |
| Ga3–N6    | 184.65(17)       |
| Ga3–Ga4   | 238.32(9)        |
| Ga4–N7    | 184.65(17)       |
| Ga4–N8    | 184.80(18)       |

**Table S 3:** Selected bond angles in [1][pf]<sub>2</sub> · 1.5oDFB.

| Atom–Atom–Atom | Angle [°] |
|----------------|-----------|
| N2–Ga1–N1      | 102.01(7) |
| N2–Ga1–Ga2     | 130.68(5) |
| N1–Ga1–Ga2     | 127.31(5) |
| N3–Ga2–N4      | 102.09(7) |
| N3–Ga2–Ga1     | 126.72(5) |
| N4–Ga2–Ga1     | 131.19(6) |
| N5–Ga3–N6      | 101.87(7) |
| N5–Ga3–Ga4     | 125.87(5) |
| N6–Ga3–Ga4     | 132.26(5) |
| N7–Ga4–N8      | 102.08(7) |
| N7–Ga4–Ga3     | 128.28(6) |
| N8–Ga4–Ga3     | 129.63(5) |

The average angle sum around the Ga atoms is 360.00(7)°; thus, the Ga atoms are coordinated in a trigonal planar fashion by the bidentate [NacNac<sup>Mes</sup>]<sup>–</sup> ligands and the adjacent Ga atom. The dihedral angle between the least-square planes is 83.55(6)° and 85.75(6)°, respectively, for the two independent [(GaNacNac)<sub>2</sub>] units.

### 3.2 $\{[\text{Ga}(\text{CDP}^{\text{Ph}})]_2\}[\text{pf}]_2$ ( $[\mathbf{2}][\text{pf}]_2$ )

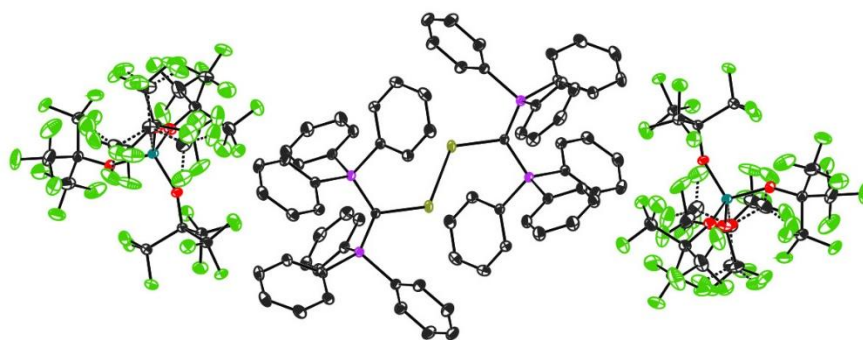

**Figure S 6:** Molecular structure of  $[\mathbf{2}][\text{pf}]_2$  in the solid state from scXRD. Hydrogen atoms are omitted for clarity, the disorder in the  $[\text{pf}]^-$  anions is shown. Thermal ellipsoids are set at 50 % probability level.

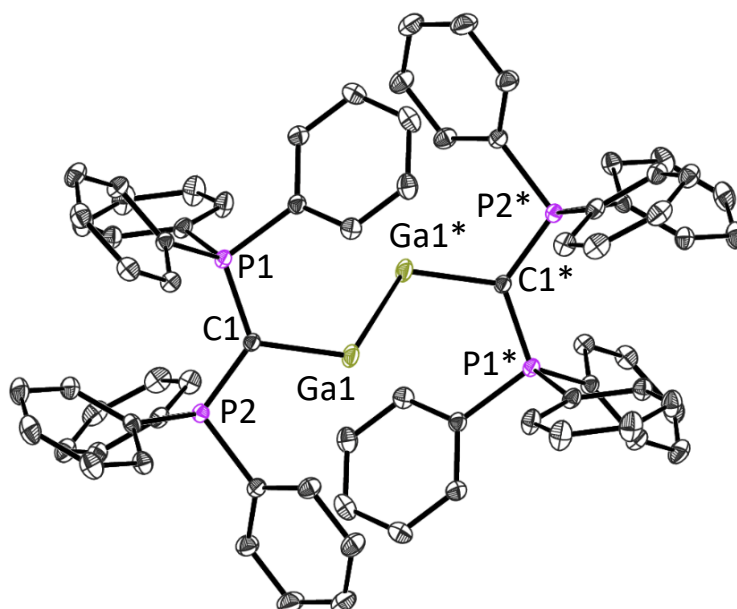

**Figure S 7:** Molecular structure of  $2^{2+}$  in the  $\text{pf}$  salt. Hydrogen atoms and anions are omitted for clarity. Thermal ellipsoids are set at 50 % probability level. The asterisks denote symmetry-generated atoms.

**Table S 4:** Selected bond lengths in  $[\mathbf{2}][\text{pf}]_2$ .

| Atom–Atom | Bond Length [pm] |
|-----------|------------------|
| Ga1–Ga1*  | 269.01(3)        |
| Ga1–C1    | 200.52(9)        |
| P1–C1     | 171.27(10)       |
| P2–C1     | 171.19(10)       |

**Table S 5:** Selected bond and dihedral angles in  $[\mathbf{2}][\text{pf}]_2$ .

| Atom–Atom–Atom(–Atom) | Angle [°]  |
|-----------------------|------------|
| C1–Ga1–Ga1*           | 118.18(3)  |
| P2–C1–P1              | 125.24(6)  |
| P2–C1–Ga1             | 114.53(5)  |
| P1–C1–Ga1             | 116.49(5)  |
| C1–Ga1–Ga1*–C1*       | 180.00(14) |

The P–C<sup>CDP</sup>–P angle is reduced to 125.24(6)°, compared to 130.1(6)°–180° in free CDP<sup>Ph</sup>.<sup>[30–32]</sup> The average C<sup>CDP</sup>–P distance is approximately 171.2 pm and is thus considerably longer than in free CDP<sup>Ph</sup> (159.8–164.2 pm),<sup>[30,32]</sup> reflecting the reduced P–C<sup>CDP</sup> double bond character in **2**<sup>2+</sup> compared to the free ligand.



### 3.3 [In(CDP<sup>Ph</sup>)]<sub>2</sub>[pf]

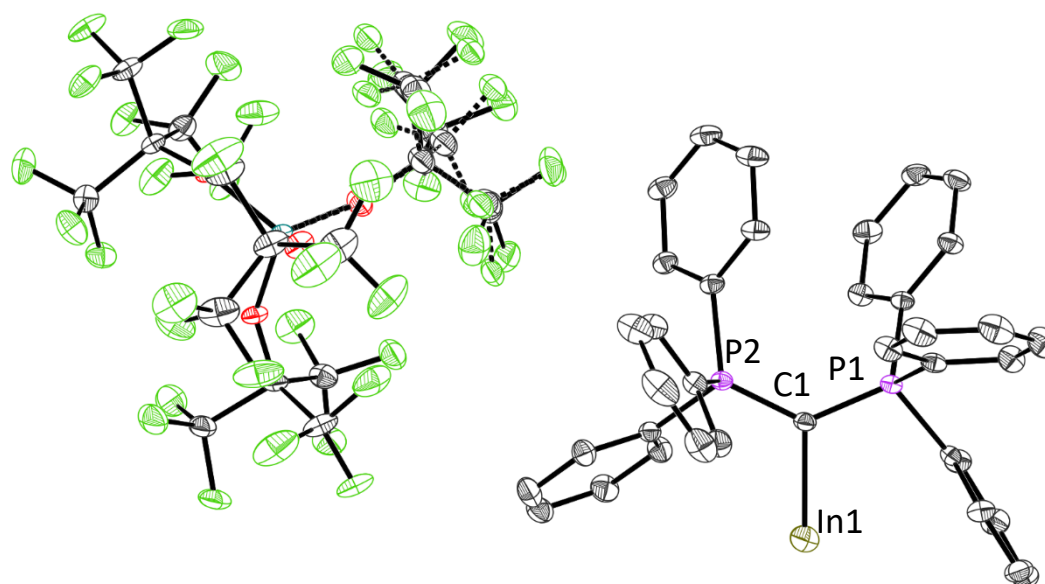

**Figure S 8:** Molecular structure of [In(CDP<sup>Ph</sup>)]<sup>+</sup> in the *pf* salt. Hydrogen atoms are omitted for clarity, the disorder in the [pf]<sup>-</sup> anions is shown. Thermal ellipsoids are set at 50 % probability level.

**Table S 6:** Selected bond lengths in [In(CDP<sup>Ph</sup>)]<sub>2</sub>[pf].

| Atom–Atom | Bond Length [pm] |
|-----------|------------------|
| In1–C1    | 225.6(2)         |
| P1–C1     | 169.1(2)         |
| P2–C1     | 181.5(2)         |

**Table S 7:** Selected bond angles in [In(CDP<sup>Ph</sup>)]<sub>2</sub>[pf].

| Atom–Atom–Atom | Angle [°]  |
|----------------|------------|
| P1–C1–P2       | 129.13(12) |
| P1–C1–In1      | 112.17(10) |
| P2–C1–In1      | 118.36(10) |

The angle sum around C1 (or C<sup>CDP</sup>) is 359.64(12)°. Thus, the central C<sup>CDP</sup> atom is coordinated in a trigonal planar fashion.

In principle, it is conceivable the metal atom is a silver instead of an indium cation, since [In(PhF)<sub>2</sub>]<sub>2</sub>[pf] is synthesized from Ag[*pf*].<sup>[3]</sup> In fact, the electron density at the metal center is slightly better described by a silver atom than by an indium atom ( $R_1 = 0.0381$ ;  $wR_2 = 0.1103$  for M = Ag instead of  $R_1 = 0.0442$ ;  $wR_2 = 0.1296$  for M = In).

However, a Ag–CDP complex without significant cation-anion or cation-solvent interaction has already been described in literature: The Ag–C<sup>CDP</sup> bond lengths in [Ag(CDP<sup>Ph</sup>)<sub>2</sub>]Cl · 1.25(THF) are 211.5(8) pm and 213.4(7) pm, which is considerably shorter than the metal–CDP<sup>Ph</sup> bond in the herein presented

compound.<sup>[33]</sup> If only one CDP<sup>Ph</sup> ligand coordinated to Ag, the Ag–C<sup>CDP</sup> distance would most likely further decrease in length, in order to diminish the electron deficiency at the In<sup>+</sup> center. In fact, the Ag–C<sup>CDP</sup> distance in the gas-phase optimized structures of [(CDP<sup>Ph</sup>)–Ag–(CDP<sup>Ph</sup>)]<sup>+</sup> (209.0 and 209.4 pm) and [Ag(CDP<sup>Ph</sup>)]<sup>+</sup> (207.9 pm; both RI-BP86(D3BJ)/def2-TZVPP, section 8.12 and 8.13) are similar, but the Ag–C<sup>CDP</sup> bond is indeed shorter in the monocoordinated complex. Thus, it is rather unlikely that the metal atom in the herein presented compound is a silver atom. Quantum chemical calculations confirm that the M–C<sup>CDP</sup> bond in [M(CDP<sup>Ph</sup>)]<sup>+</sup> is longer for M = In (239.7 pm) than for M = Ag (207.9 pm; both RI-BP86(D3BJ)/def2-TZVPP, section 8.11 and 8.12). Since, due to crystal packing effects, the bond lengths in [{Ga(CDP<sup>Ph</sup>)<sub>2</sub>][*pf*]<sub>2</sub> (**2**)] found in the solid state are shorter compared to the calculated bond lengths in its gas phase-optimized structure (section 8.4), it is reasonable to assume that the calculated bond length is in better agreement with the metal being indium instead of silver.

Besides this, the isolated compound could also, in principle, be an In<sup>III</sup> species, *i.e.* [H<sub>2</sub>In(CDP<sup>Ph</sup>)] [*pf*], considering that observing hydrogen atoms in close proximity to the heavy indium atoms by XRD may be difficult. However, the C–In bond length is clearly rather indicative of an indium cation in its lower oxidation state since it is very similar to the bond lengths in other organometallic, monovalent indium species. For example, the covalent C–In bond length of 225.6(2) pm is virtually identical to the C–In bond length in related compounds like monomeric 2,6-(Tripp)<sub>2</sub>C<sub>6</sub>H<sub>3</sub>–In<sup>I</sup> (226.0(7) pm),<sup>[34]</sup> dimeric [In{2,6-(Dipp)<sub>2</sub>C<sub>6</sub>H<sub>3</sub>}]<sub>2</sub> (225.6(2) pm)<sup>[35]</sup> and in tetrameric [In{C(SiMe<sub>3</sub>)<sub>3</sub>}]<sub>4</sub> (225(1) pm).<sup>[36]</sup> Consequently, the In–C bond lengths even in sterically highly congested organometallic In<sup>III</sup> species like X<sub>2</sub>In(Mes\*) (Mes\* = 2,4,6-(*t*Bu)<sub>3</sub>C<sub>6</sub>H<sub>3</sub>; X = Cl, Br),<sup>[37]</sup> XIn(Mes\*)<sub>2</sub> (X = Cl, Br),<sup>[38]</sup> [Cl<sub>2</sub>In(2,6-Mes<sub>2</sub>C<sub>6</sub>H<sub>3</sub>)]<sub>2</sub><sup>[39]</sup> or BrIn(2,6-Mes<sub>2</sub>C<sub>6</sub>H<sub>3</sub>)<sub>2</sub><sup>[40]</sup> are considerably shorter and range from 210 to 217 pm. Additionally, the experimental Raman spectrum of [In(CDP<sup>Ph</sup>)] [*pf*] compares very well with the simulated spectrum for [In(CDP<sup>Ph</sup>)]<sup>+</sup> and the experimental spectrum of NO [*pf*] as can be seen in **Figure S 58**. The spectrum of NO [*pf*] is displayed in order to show the vibrations dedicated to the anion. The absence of the ν(In–H) bands at 1760 cm<sup>-1</sup> and 1780 cm<sup>-1</sup> in the experimental Raman spectrum again strongly suggests that no In–H bond is present in the molecule.

Examples of one-coordinated metal atoms in organometallic compounds in a solid state structure are very scarce.<sup>[34,41]</sup> In this novel compound, the indium atoms barely interact with the [*pf*]<sup>-</sup> anions: the shortest In–F distance is 353.1(3) pm while the sum of the van der Waals radii is 340 pm.<sup>[42]</sup> On the other hand, the shortest distance between the In atom and a carbon atom of an adjacent phenyl ring is only 302.0(2) pm, which is below the sum of the van der Waals radii (ca. 363 pm<sup>[42]</sup>) and suggests that the arene moieties donate electron density in the empty 5*p* orbitals of In<sup>+</sup>. The shortest In–In distance exceeds 1000 pm, ruling out any In–In interaction.

## 4 Powder Diffraction

In **Figure S 9** and **Figure S 10**, the experimental powder diffractograms of  $\{[\text{Ga}(\text{NacNac}^{\text{Mes}})]_2[\text{pf}]_2 \cdot 1.5\text{oDFB}$  ( $[\mathbf{1}][\text{pf}]_2 \cdot 1.5\text{oDFB}$ ) and  $\{[\text{Ga}(\text{CDP}^{\text{Ph}})]_2[\text{pf}]_2$  ( $[\mathbf{2}][\text{pf}]_2$ ) are compared with the respective simulated diffractograms. The diffractogram of  $[\mathbf{1}][\text{pf}]_2 \cdot 1.5\text{oDFB}$  indicates high purity of the bulk compound, suggesting that the  $\text{Li}[\text{pf}]$  or  $\text{LiNacNac}^{\text{Mes}}$  impurity found in the  $^7\text{Li}$  NMR (**Figure S 21**) is negligible.

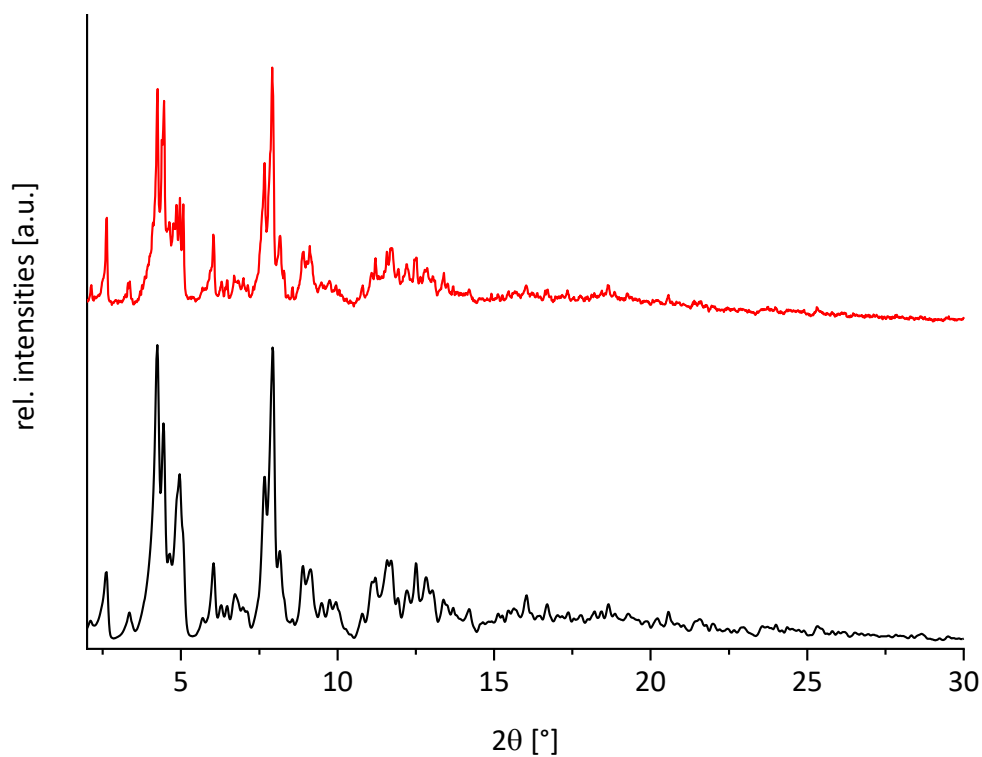

**Figure S 9:** Comparison of the experimental (red) and simulated (black) powder diffractogram of  $[\mathbf{1}][\text{pf}]_2 \cdot 1.5\text{oDFB}$ .

By contrast, the experimental diffractogram of  $[2][pf]_2$  does not fit as well to the simulated diffractogram. This is arguably due to the high reactivity and poor stability of this dicationic digallene. It is conceivable that the trituration process and the mechanical stress on the crystals prior to analysis results in a structural transformation, *e.g.* bond dissociation of the weak  $Ga\rightleftharpoons Ga$  double bond, leading to a changing powder pattern. Additionally, since the complex is capable of activating C–H bonds (section 5.7), it cannot be ruled out that crystalline side products form during the crystallization process.

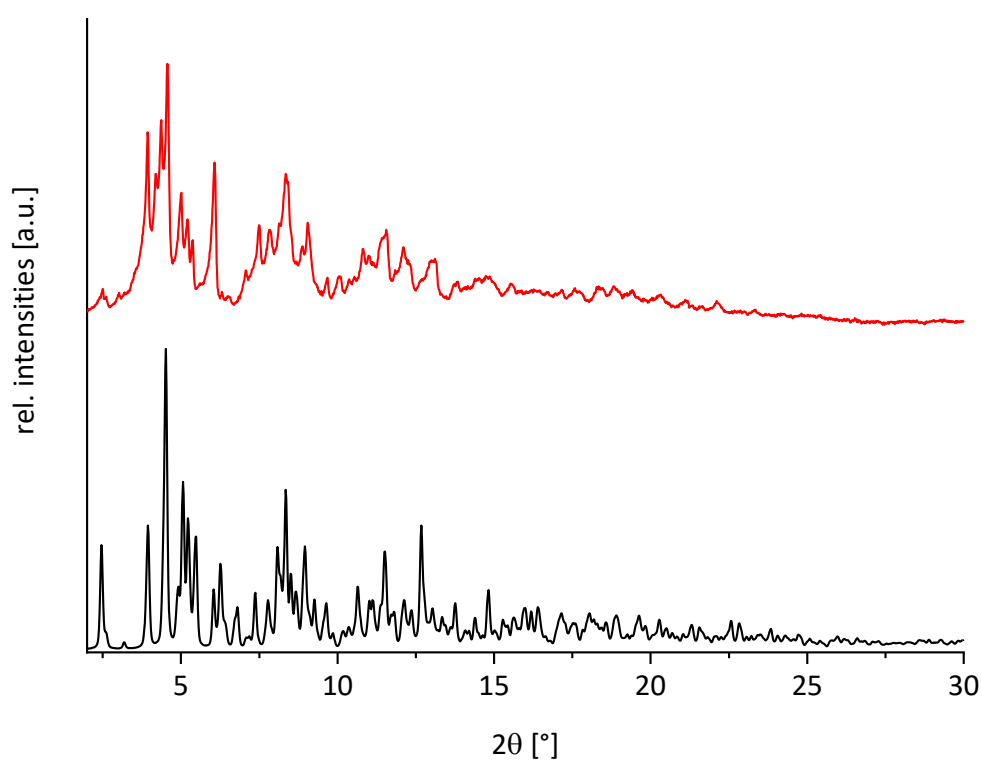

**Figure S 10:** Comparison of the experimental (red) and simulated (black) powder diffractogram of  $[2][pf]_2$ .

## 5 NMR Spectroscopy

### 5.1 HNacNac<sup>Mes</sup>

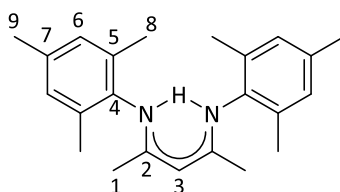

<sup>1</sup>H-NMR [300.18 MHz, CDCl<sub>3</sub>, 298 K]:  $\delta$  = 12.19 (s, 1 H, NH), 6.89 (s, 4 H, C<sup>6</sup>H), 4.89 (s, 1 H, C<sup>3</sup>H), 2.29 (s, 6 H, C<sup>9</sup>H<sub>3</sub>), 2.16 (s, 12 H, C<sup>8</sup>H<sub>3</sub>), 1.72 (s, 6 H, C<sup>1</sup>H<sub>3</sub>) ppm.

<sup>13</sup>C-NMR [75.48 MHz, CDCl<sub>3</sub>, 298 K]:  $\delta$  = 161.0 (2 C, C<sup>2</sup>) 141.3 (2 C, C<sup>7</sup>), 133.6 (4 C, C<sup>5</sup>), 131.8 (2 C, C<sup>4</sup>), 128.5 (4 C, C<sup>6</sup>), 93.5 (1 C, C<sup>3</sup>), 21.0 (4 C, C<sup>8</sup>), 20.4 (2 C, C<sup>9</sup>), 18.4 (2 C, C<sup>1</sup>), ppm.

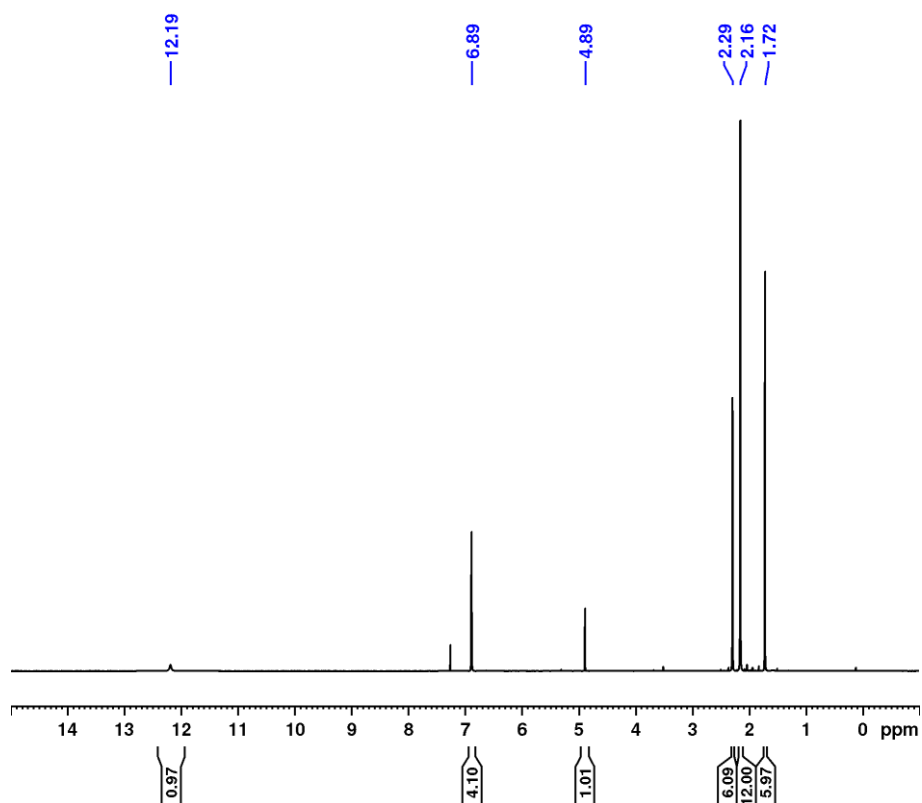

Figure S 11: <sup>1</sup>H-NMR spectrum (300.18 MHz, CDCl<sub>3</sub>, 298 K) of HNacNac<sup>Mes</sup>.

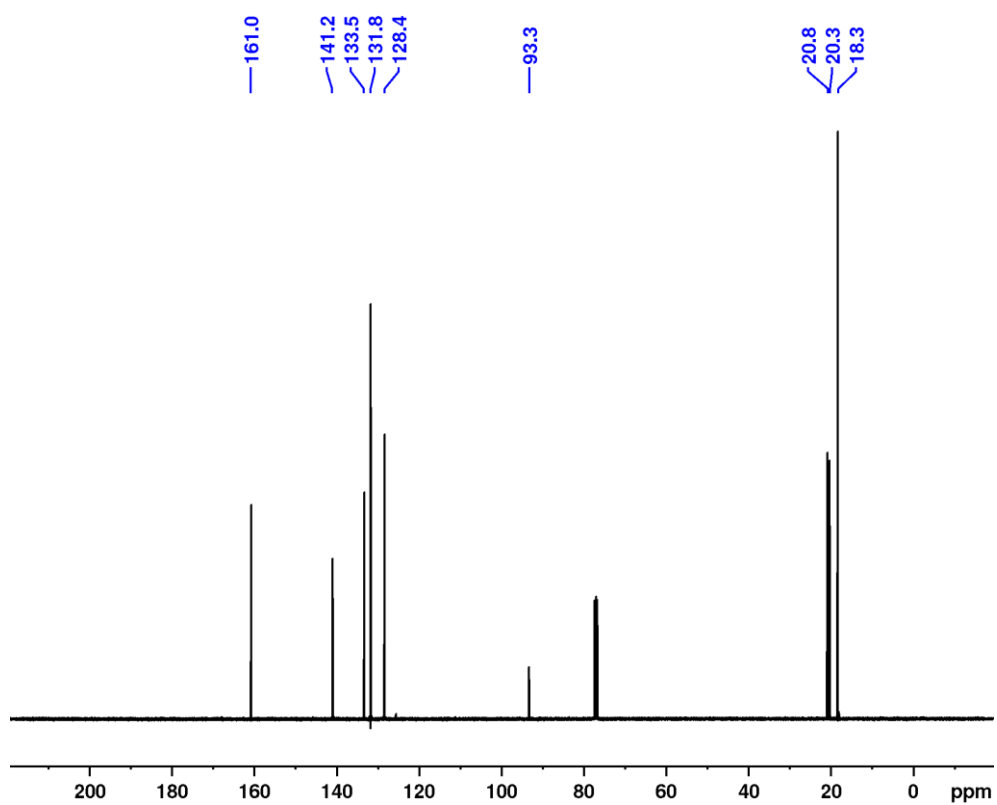

**Figure S 12:**  $^{13}\text{C}\{^1\text{H}\}$ -NMR spectrum (100.62 MHz,  $\text{CDCl}_3$ , 298 K) of  $\text{HNacNac}^{\text{Mes}}$ .

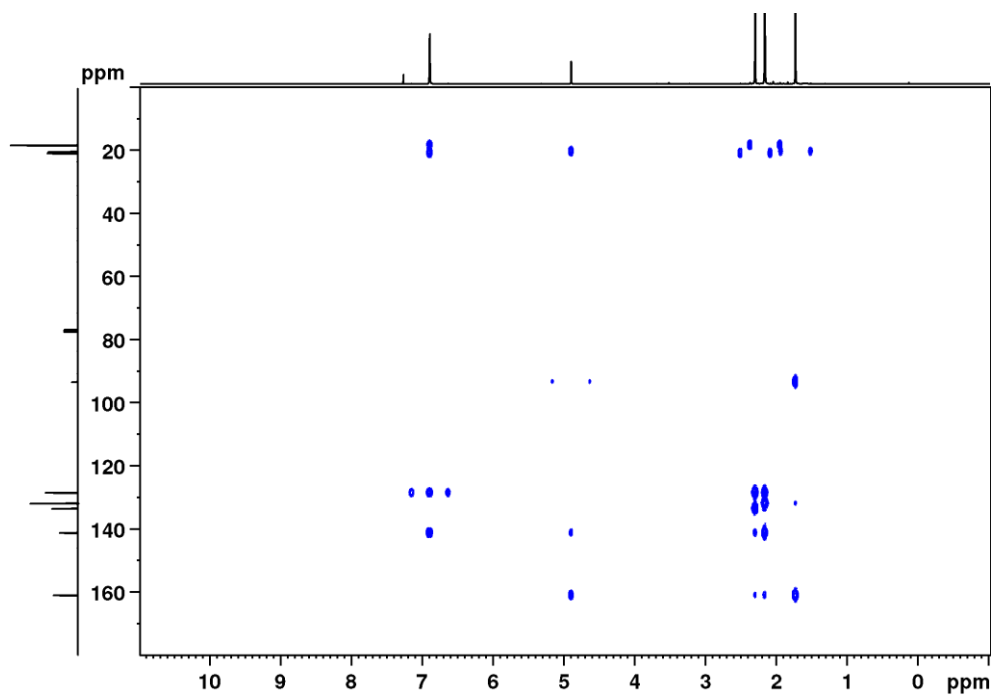

**Figure S 13:**  $^1\text{H}$ ,  $^{13}\text{C}$  HMBC (300.18 MHz,  $\text{CDCl}_3$ , 298 K, optimized for  $J = 8$  Hz) of  $\text{HNacNac}^{\text{Mes}}$ .

## 5.2 LiNacNac<sup>Mes</sup>

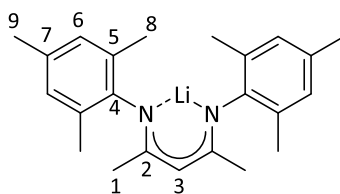

<sup>1</sup>H-NMR [300.18 MHz, C<sub>6</sub>D<sub>6</sub>, 298 K]:  $\delta$  = 6.94 (s, 4 H, C<sup>6</sup>H), 4.79 (s, 1 H, C<sup>3</sup>H), 2.31 (s, 6 H, C<sup>9</sup>H<sub>3</sub>), 2.04 (s, 12 H, C<sup>8</sup>H<sub>3</sub>), 1.70 (s, 6 H, C<sup>1</sup>H<sub>3</sub>) ppm.

<sup>7</sup>Li-NMR [116.66 MHz, C<sub>6</sub>D<sub>6</sub>, 298 K]:  $\delta$  = -0.9 (s, 1 Li, NLi) ppm.

<sup>1</sup>H-NMR [300.18 MHz, *o*DFB, 298 K]:  $\delta$  = 6.75 (s, 4 H, C<sup>6</sup>H), 4.80 (s, 1 H, C<sup>3</sup>H), 2.18 (s, 6 H, C<sup>9</sup>H<sub>3</sub>), 2.10 (s, 12 H, C<sup>8</sup>H<sub>3</sub>), 1.67 (s, 6 H, C<sup>1</sup>H<sub>3</sub>) ppm.

<sup>7</sup>Li-NMR [116.66 MHz, *o*DFB, 298 K]:  $\delta$  = 2.1 (s, 1 Li, NLi) ppm.

<sup>13</sup>C-NMR [75.48 MHz, *o*DFB, 298 K]:  $\delta$  = 163.4 (2 C, C<sup>2</sup>), 149.4 (2 C, C<sup>4</sup>), 130.6 (2 C, C<sup>7</sup>), 130.2 (4 C, C<sup>5</sup>), 128.3 (4 C, C<sup>6</sup>), 92.5 (1 C, C<sup>3</sup>), 21.9 (2 C, C<sup>1</sup>), 19.8 (2 C, C<sup>9</sup>), 17.7 (4 C, C<sup>8</sup>) ppm.

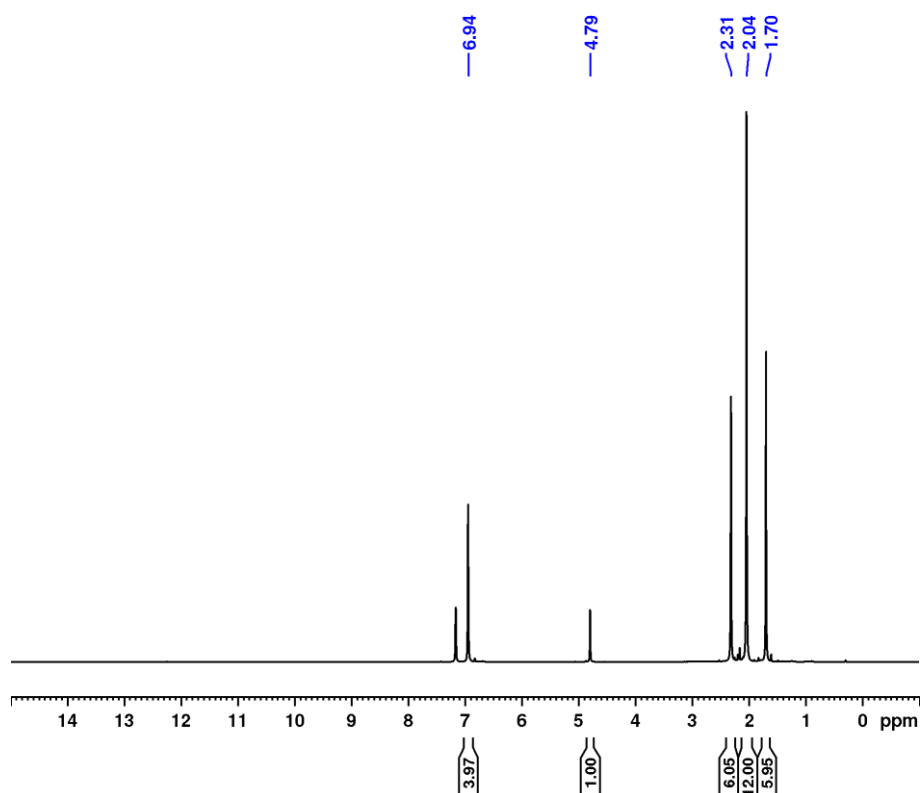

Figure S 14: <sup>1</sup>H-NMR spectrum (300.18 MHz, C<sub>6</sub>D<sub>6</sub>, 298 K) of LiNacNac<sup>Mes</sup>.

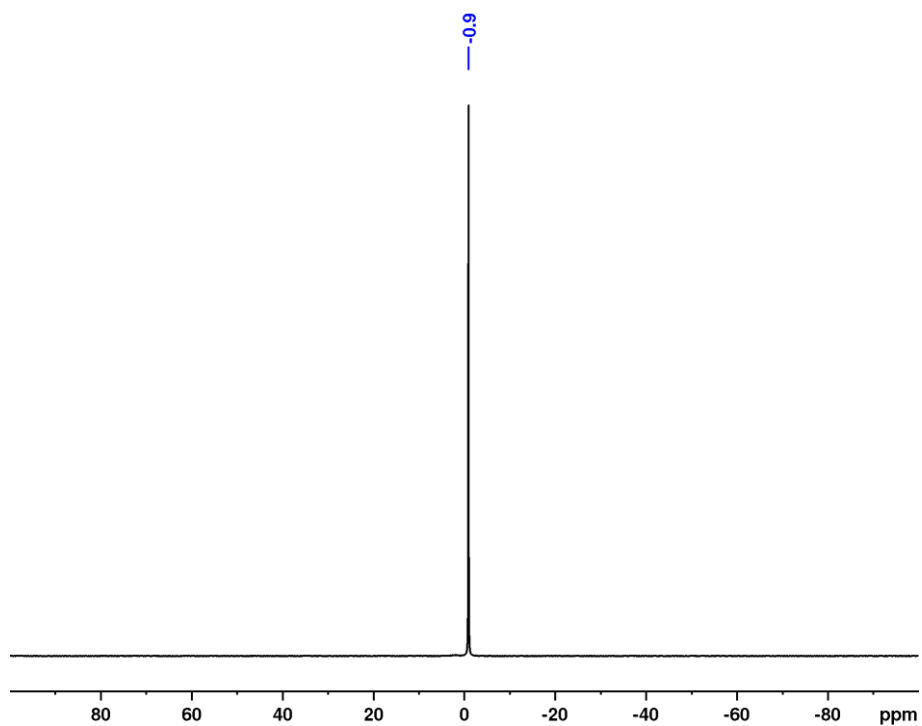

Figure S 15:  ${}^7\text{Li}$ -NMR spectrum (116.66 MHz,  $\text{C}_6\text{D}_6$ , 298 K) of  $\text{LiNacNac}^{\text{Mes}}$ .

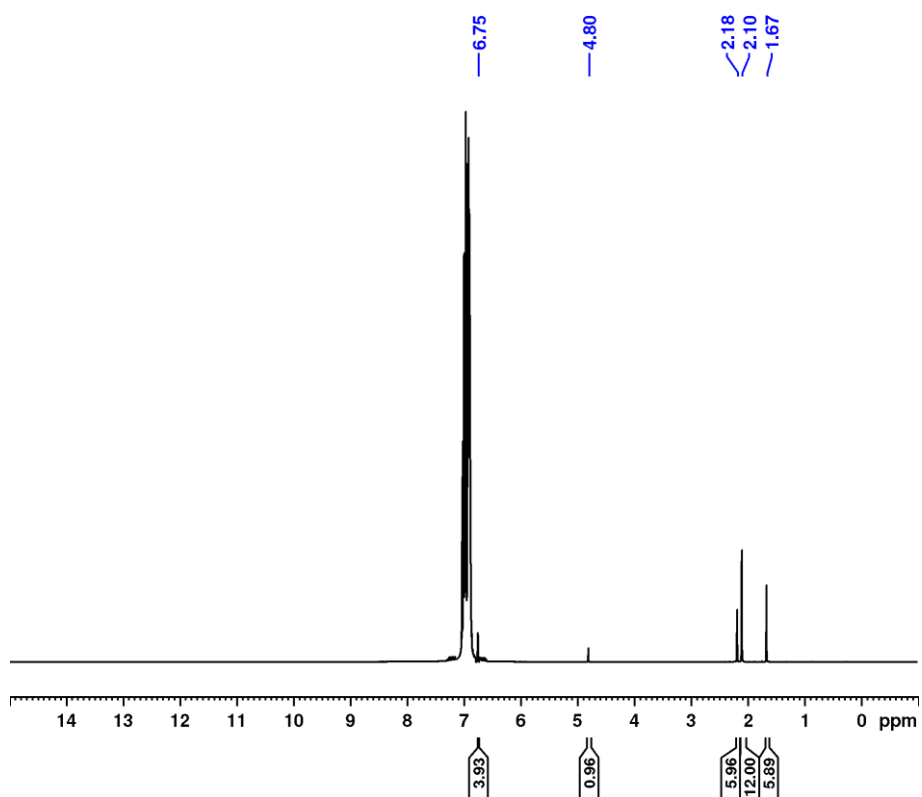

Figure S 16:  ${}^1\text{H}$ -NMR spectrum (300.18 MHz,  $\text{oDFB}$ , 298 K) of  $\text{LiNacNac}^{\text{Mes}}$ .



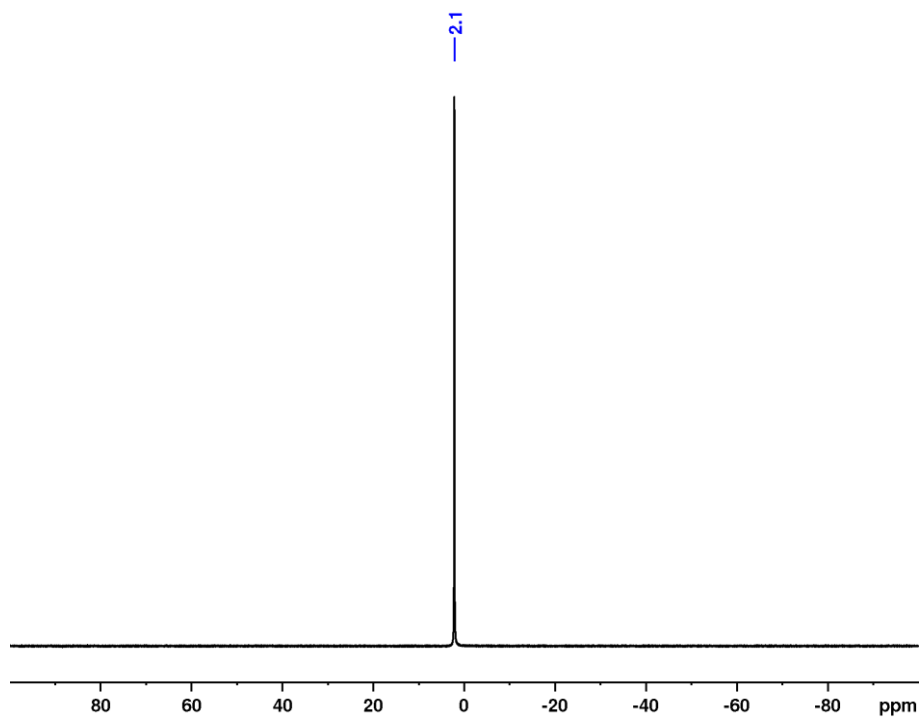

**Figure S 17:**  ${}^7\text{Li}$ -NMR spectrum (116.66 MHz, oDFB, 298 K) of  $\text{LiNaCNac}^{\text{Mes}}$  (field correction according to  ${}^1\text{H}$ -NMR spectrum).

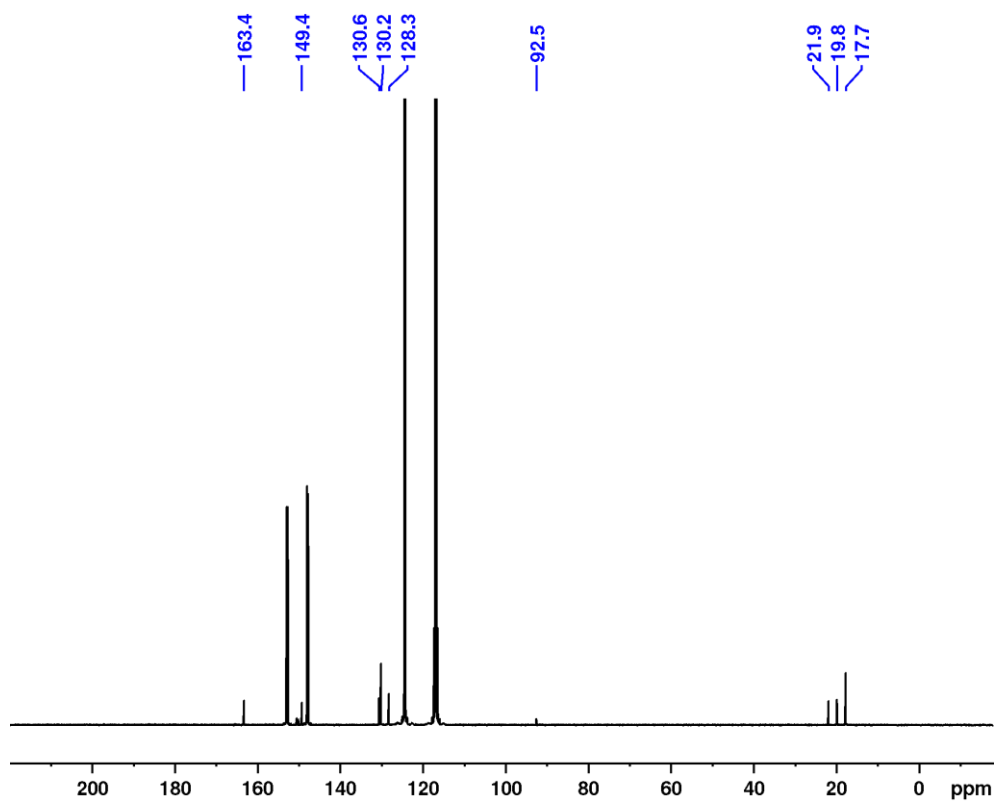

**Figure S 18:**  ${}^{13}\text{C}\{{}^1\text{H}\}$ -NMR spectrum (50.32 MHz, oDFB, 298 K) of  $\text{LiNaCNac}^{\text{Mes}}$ .



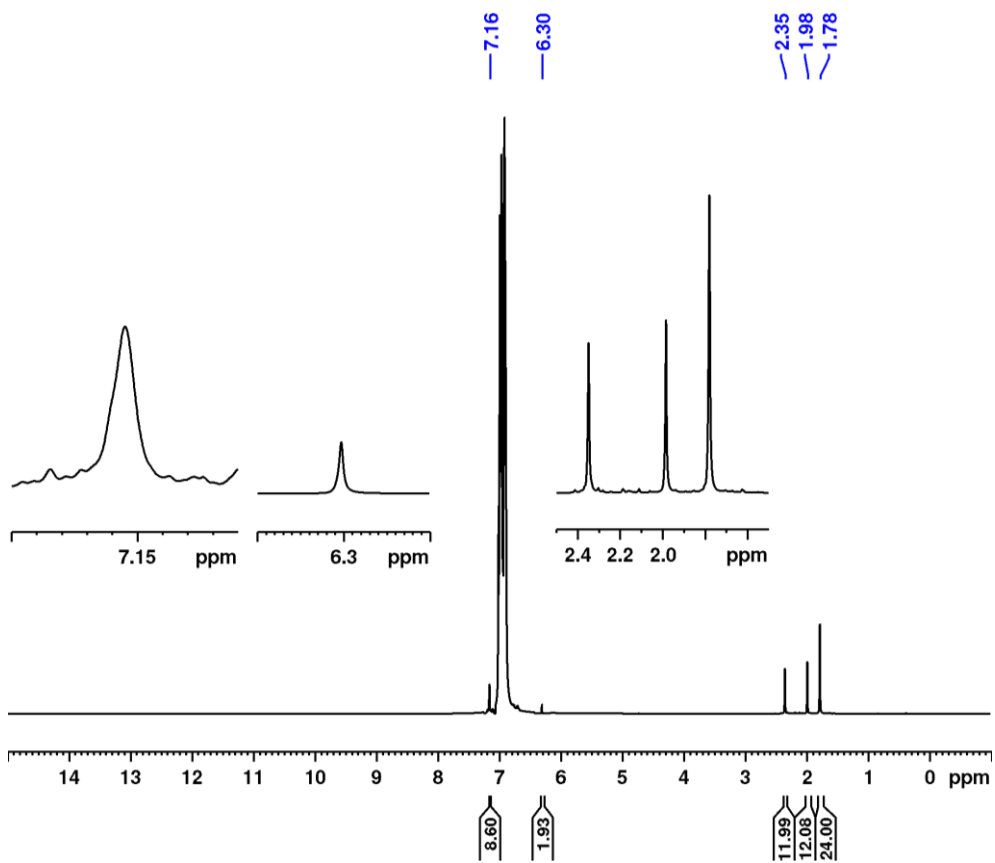

Figure S 20:  $^1\text{H}$ -NMR spectrum (400.17 MHz, oDFB, 298 K) of  $[\mathbf{1}][\text{pf}]_2 \cdot 1.5\text{oDFB}$ .

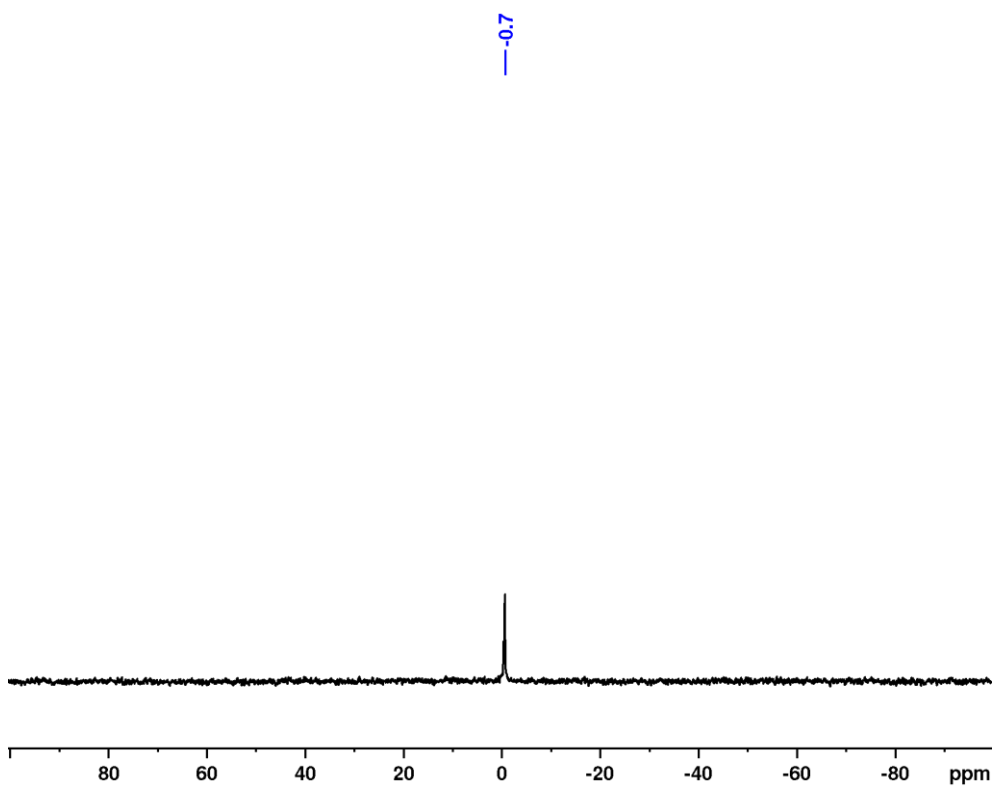

Figure S 21:  $^7\text{Li}$ -NMR spectrum (155.52 MHz, oDFB, 298 K) of crystalline  $[\mathbf{1}][\text{pf}]_2 \cdot 1.5\text{oDFB}$ .

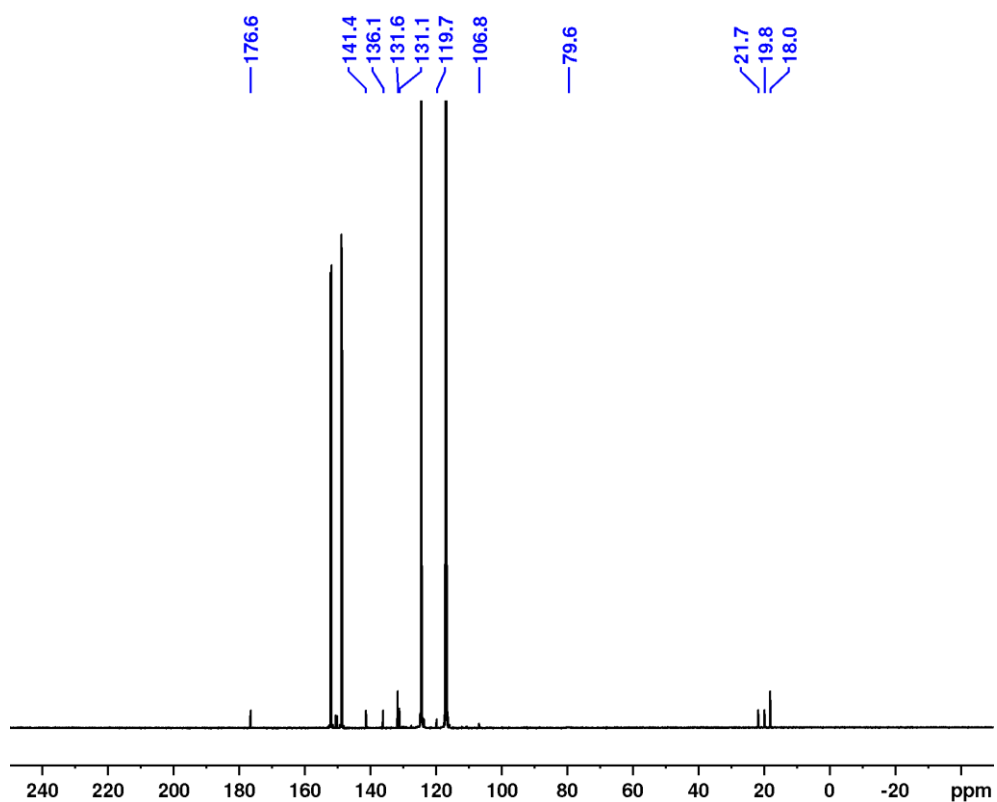

Figure S 22:  $^{13}\text{C}\{^1\text{H}\}$ -NMR spectrum (75.48 MHz, oDFB, 298 K) of crystalline  $[1][\text{pf}]_2 \cdot 1.5\text{oDFB}$ .

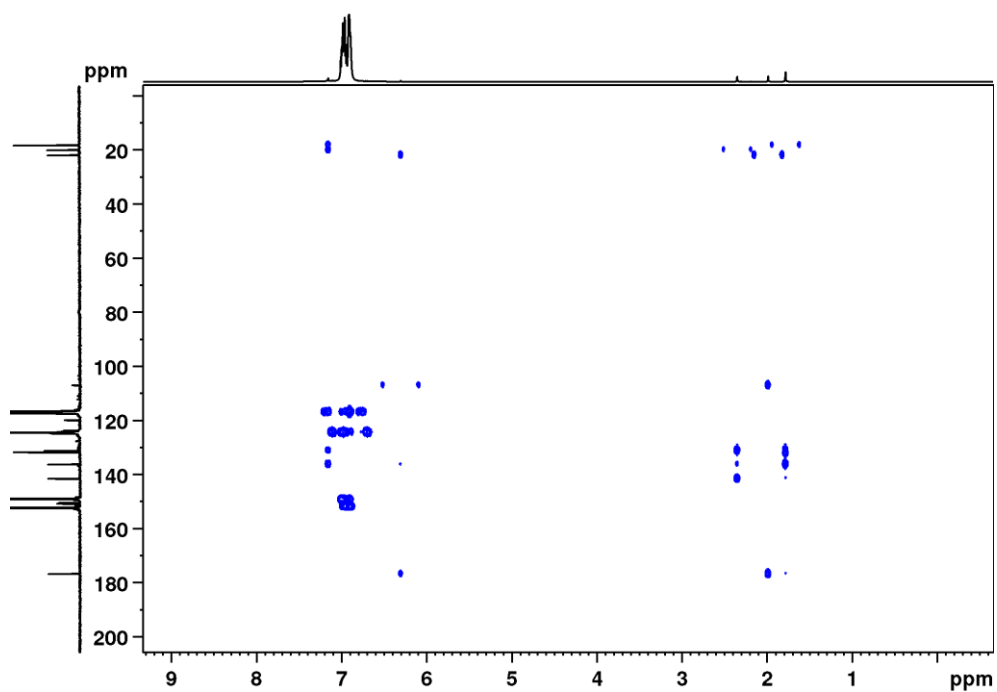

Figure S 23:  $^1\text{H}$ ,  $^{13}\text{C}$  HMBC (400.17 MHz, oDFB, 298 K, optimized for  $J = 8$  Hz) of crystalline  $[1][\text{pf}]_2 \cdot 1.5\text{oDFB}$ .

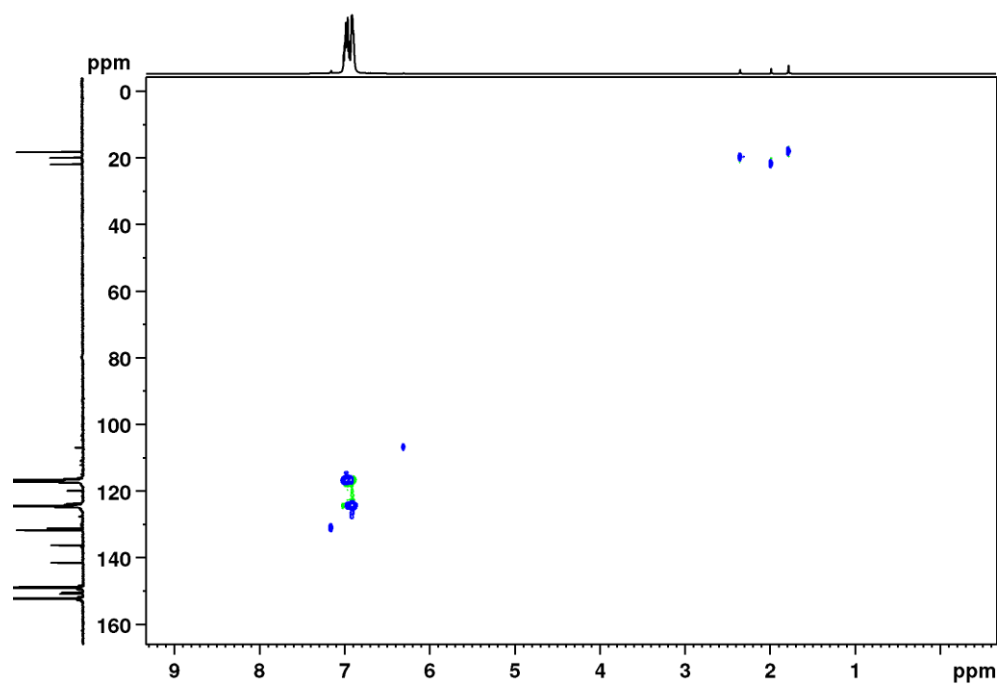

Figure S 24:  $^1\text{H}$ ,  $^{13}\text{C}$  HSQC (400.17 MHz, oDFB, 298 K, optimized for  $J = 145$  Hz) of crystalline  $[1][\text{pf}]_2 \cdot 1.5\text{oDFB}$ .

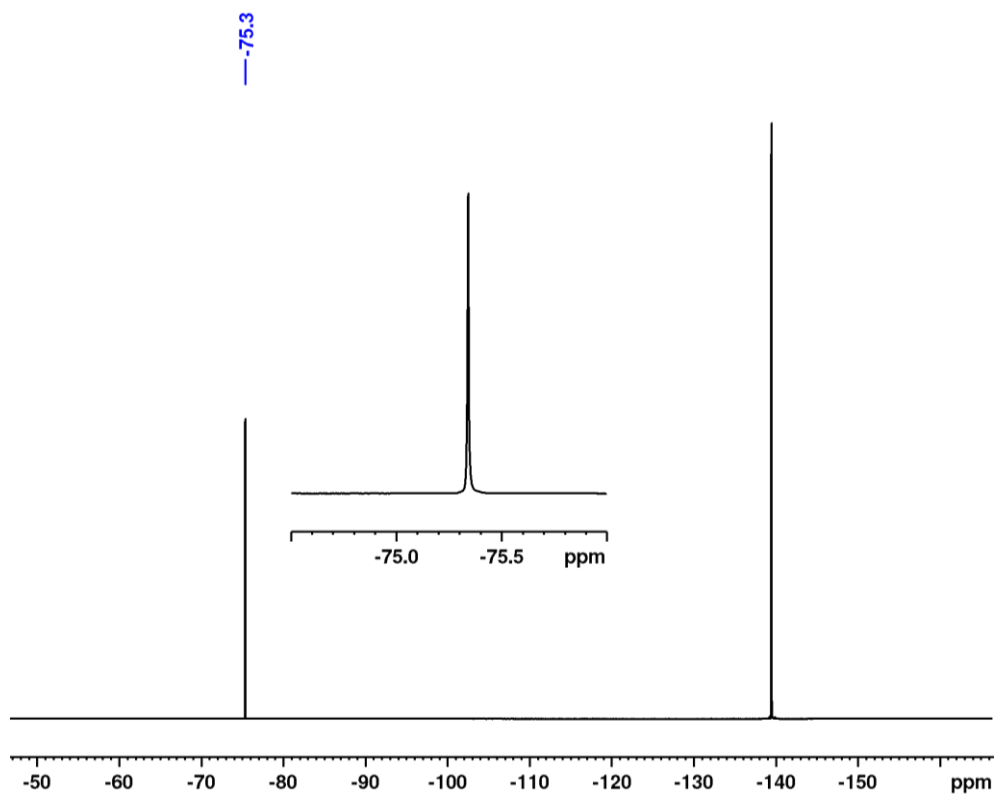

Figure S 25:  $^{19}\text{F}$ -NMR spectrum (376.54 MHz, oDFB, 298 K) of crystalline  $[1][\text{pf}]_2 \cdot 1.5\text{oDFB}$ .

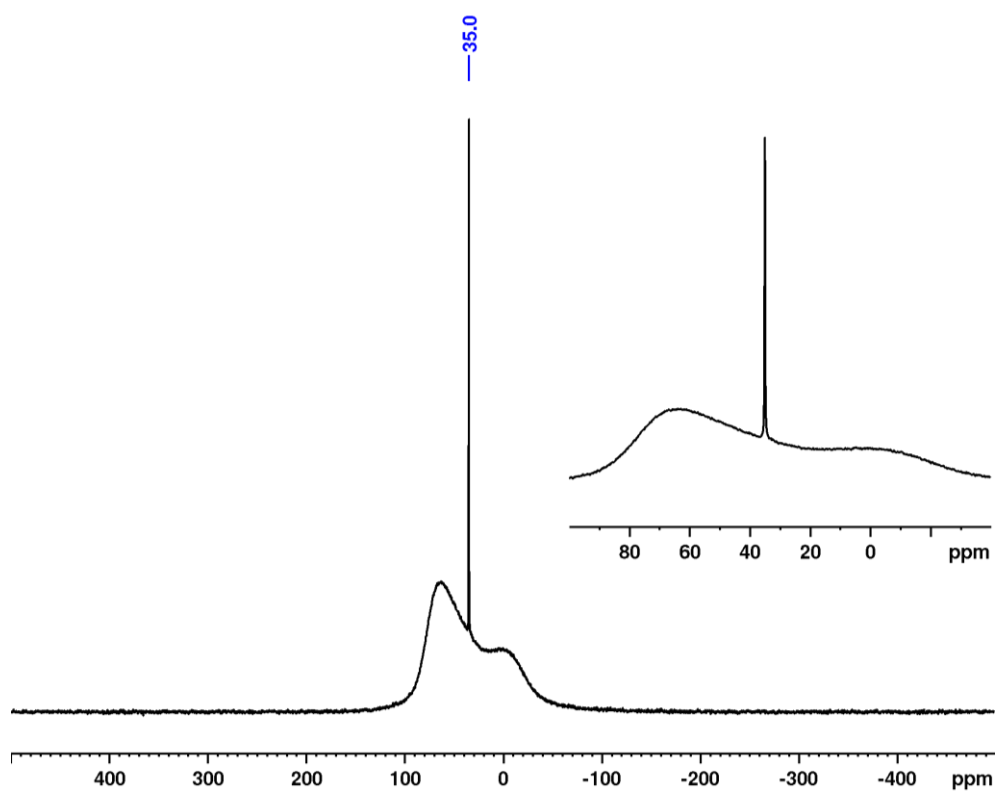

**Figure S 26:**  $^{27}\text{Al}$ -NMR spectrum (104.27 MHz, oDFB, 298 K) of crystalline  $[1][pf]_2 \cdot 1.5oDFB$  (The broad resonances are caused by the probe head).

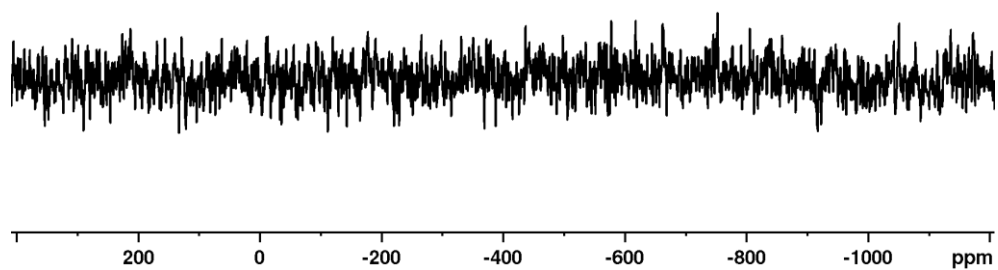

**Figure S 27:**  $^{71}\text{Ga}$ -NMR spectrum (122.04 MHz, oDFB, 298 K) of crystalline  $[1][pf]_2 \cdot 1.5oDFB$ .

#### 5.4 $[\text{Ph}_3\text{PCH}_2\text{PPh}_3]\text{Br}_2$

$^1\text{H-NMR}$  [400.17 MHz, methanol- $d_4$ , calibrated at  $\text{CHD}_2\text{OD} = 3.31$  ppm, 298 K]:  $\delta = 7.85$  (m, 18 H,  $\text{C}^2\text{H}$  and  $\text{C}^4\text{H}$ ), 7.60 (m, 12 H,  $\text{C}^3\text{H}$ ), 4.91 (s, coalescence signal of the solvent  $\text{HO}$ -protons with the acidic  $\text{C}^1\text{H}$ -protons) ppm.

$^{31}\text{P-NMR}$  [161.99 MHz, methanol- $d_4$ , 298 K]:  $\delta = 20.4$  (unknown species), 18.7 (s, 2 P,  $[\text{H}_2\text{C}(\text{PPh}_3)_2]^+$ ) ppm.

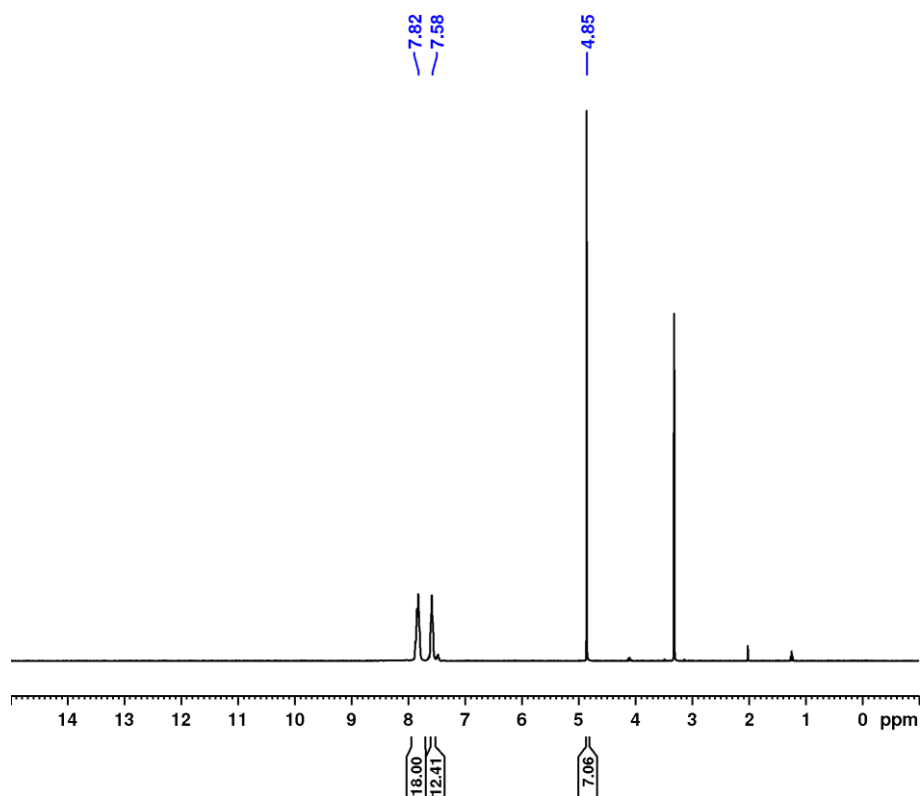

**Figure S 28:**  $^1\text{H-NMR}$  spectrum (400.17 MHz,  $\text{CD}_3\text{OD}$ , 298 K) of  $[\text{Ph}_3\text{PCH}_2\text{PPh}_3]\text{Br}_2$ .

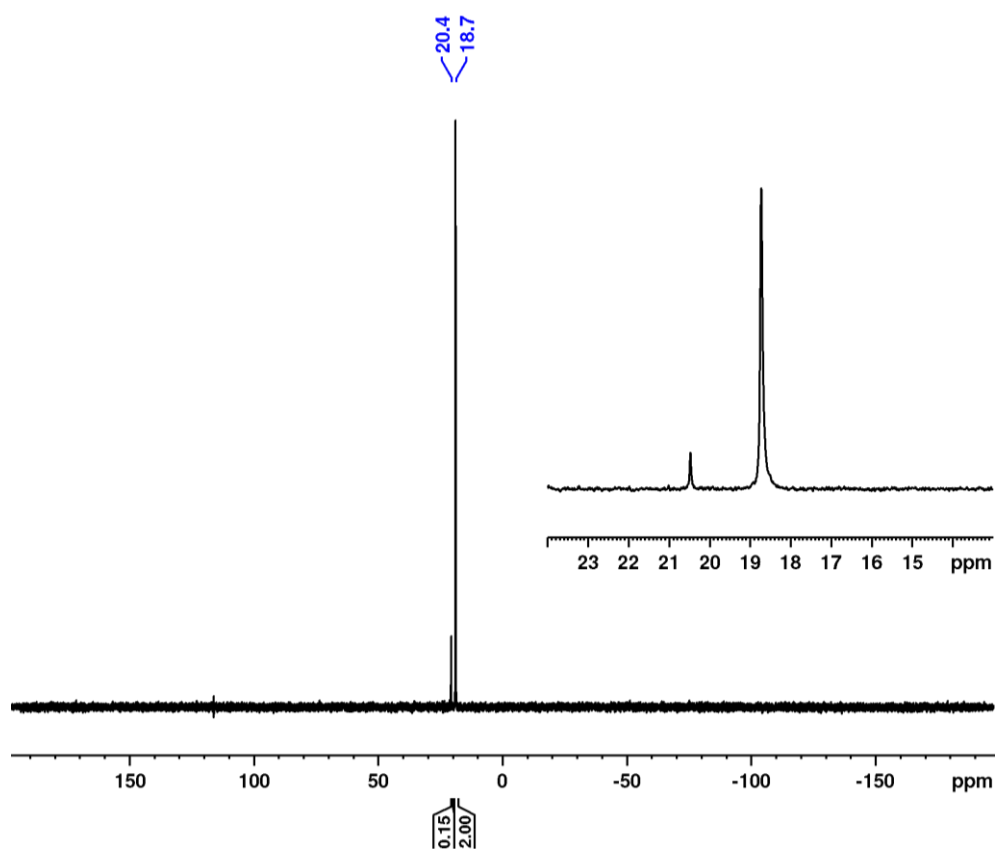

**Figure S 29:**  $^{31}\text{P}\{^1\text{H}\}$ -NMR spectrum (161.99 MHz,  $\text{CD}_3\text{OD}$ , 298 K) of  $[\text{Ph}_3\text{PCH}_2\text{PPh}_3]\text{Br}_2$ .

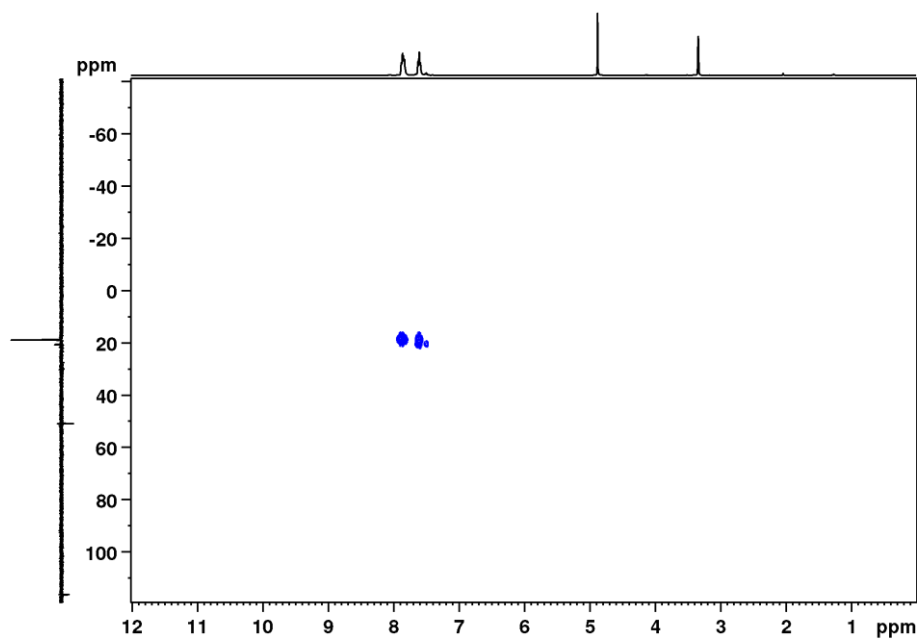

**Figure S 30:**  $^1\text{H}$ ,  $^{31}\text{P}$  HMBC (300.18 MHz, oDFB, 298 K, optimized for  $J = 15$  Hz) of  $[\text{Ph}_3\text{PCH}_2\text{PPh}_3]\text{Br}_2$ .



## 5.5 CDP<sup>Ph</sup>

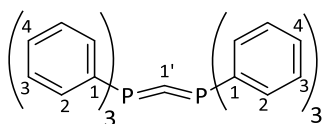

**<sup>1</sup>H-NMR** [300.18 MHz, *o*DFB, calibrated at *o*C<sub>6</sub>F<sub>2</sub>H<sub>4</sub> = 6.96 ppm, 298 K]:  $\delta$  = 7.76 (m, 12 H, C<sup>2</sup>H), 7.20 (m, 6 H, C<sup>4</sup>H), 7.13 (m, 12 H, C<sup>3</sup>H), 3.65 (m, 4 H, O(CH<sub>2</sub>CH<sub>2</sub>)<sub>2</sub>), 1.68 (m, 4 H, O(CH<sub>2</sub>CH<sub>2</sub>)<sub>2</sub>) ppm.

**<sup>13</sup>C-NMR** [75.48 MHz, *o*DFB, 298 K]:  $\delta$  = 137.5 (m, 6 C, C<sup>1</sup>), 132.1 (ps. t, 12 C, C<sup>2</sup>, <sup>2</sup>J<sub>C<sub>2</sub>,P</sub> = 5.3 Hz), 129.0 (ps. t, 6 C, C<sup>4</sup>, <sup>4</sup>J<sub>C<sub>4</sub>,P</sub> = 1.4 Hz), 127.3 (ps. t, 12 C, C<sup>3</sup>, <sup>3</sup>J<sub>C<sub>3</sub>,P</sub> = 5.9 Hz), 12.4 (t, 1 C, C<sup>1'</sup>, <sup>3</sup>J<sub>C<sup>1'</sup>,P</sub> = 121.0 Hz) ppm.

**<sup>31</sup>P-NMR** [121.52 MHz, *o*DFB, 298 K]:  $\delta$  = -3.9 (s, 2 P, C(PPh<sub>3</sub>)<sub>2</sub>) ppm.

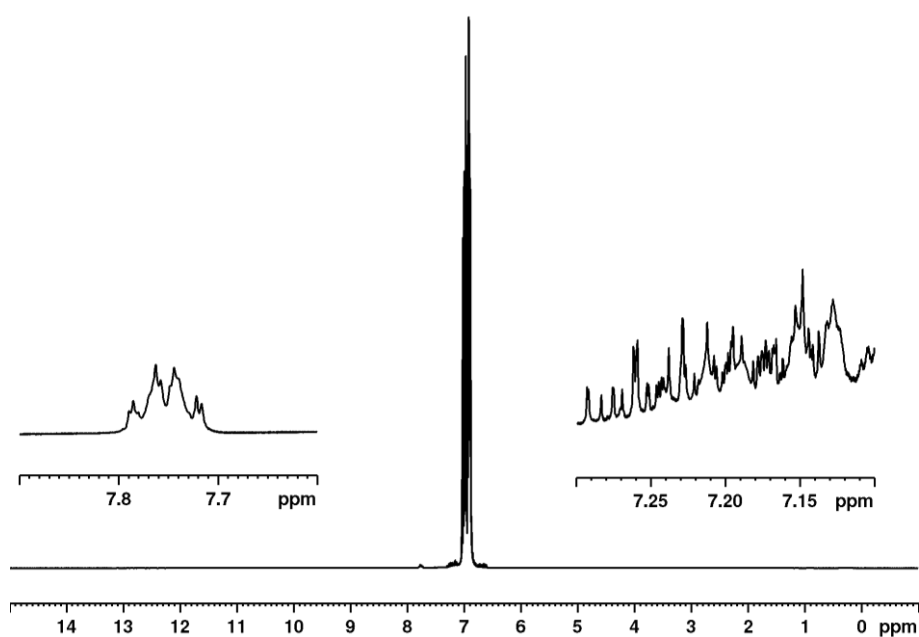

**Figure S 31:** <sup>1</sup>H-NMR spectrum (400.17 MHz, *o*DFB, 298 K) of CDP<sup>Ph</sup> (in the area between 7.10 and 7.20 ppm the resonances of C<sup>3</sup>H and C<sup>4</sup>H are found but they overlap with the <sup>13</sup>C satellites of the solvent).

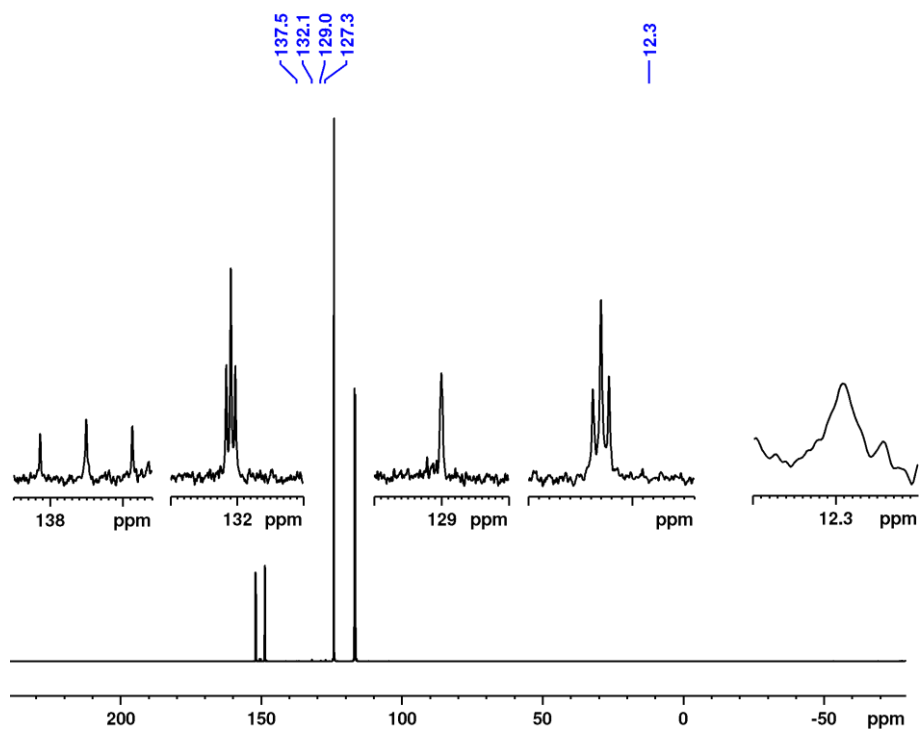

Figure S 32:  $^{13}\text{C}\{^1\text{H}\}$ -NMR spectrum (75.48 MHz, oDFB, 298 K) of CDP<sup>Ph</sup>.

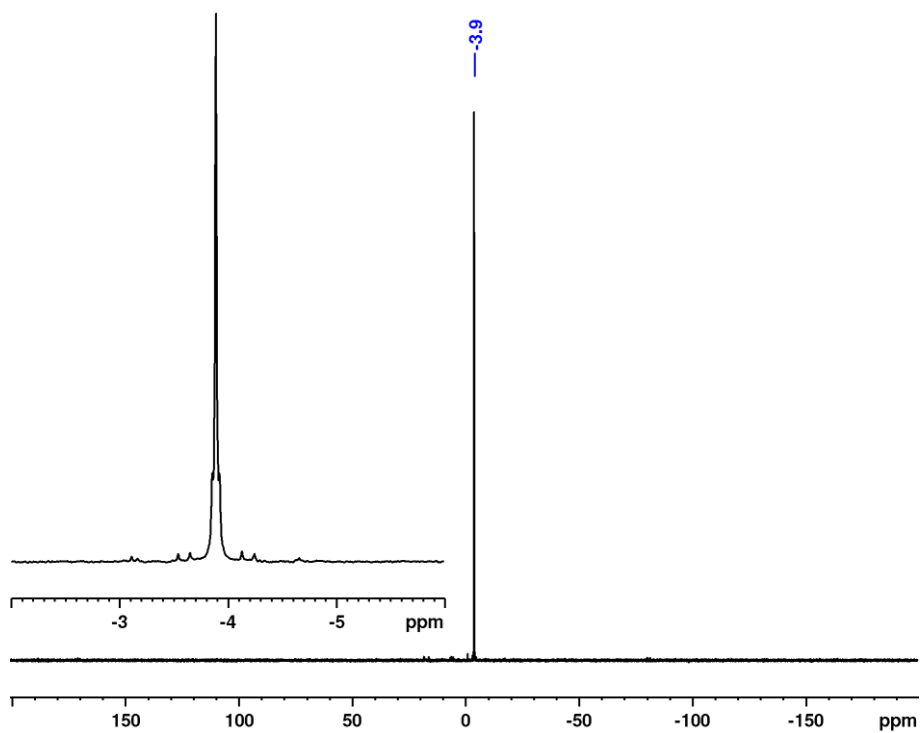

Figure S 33:  $^{31}\text{P}\{^1\text{H}\}$ -NMR spectrum (121.52 MHz, oDFB, 298 K) of CDP<sup>Ph</sup>.

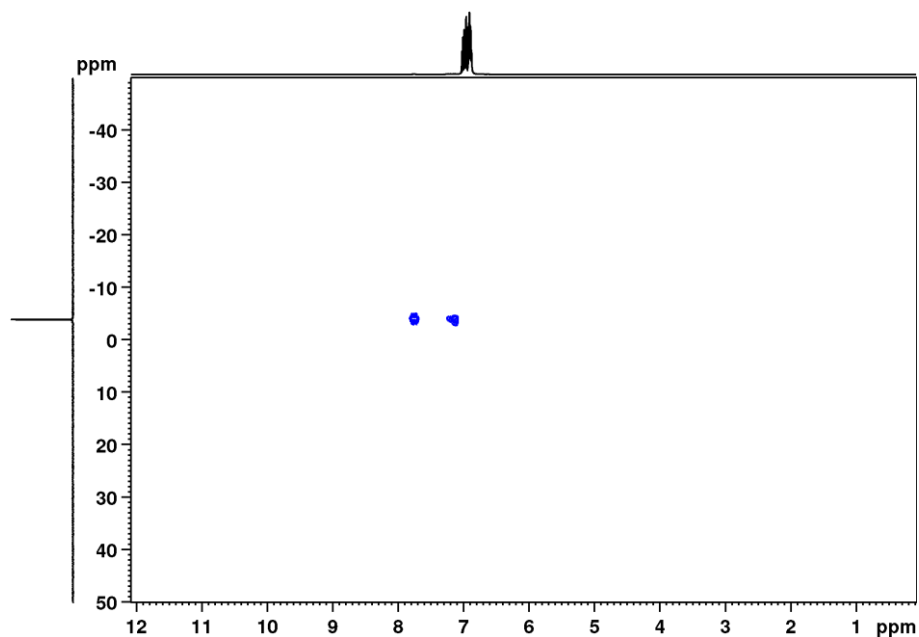

Figure S 34:  $^1\text{H}$ ,  $^{31}\text{P}$  HMBC (300.18 MHz, *o*DFB, 298 K, optimized for  $J = 15$  Hz) of  $\text{CDP}^{\text{Ph}}$ .

## 5.6 $\{[\text{Ga}(\text{CDP}^{\text{Ph}})]_2[\text{pf}]_2\} ([2][\text{pf}]_2)$

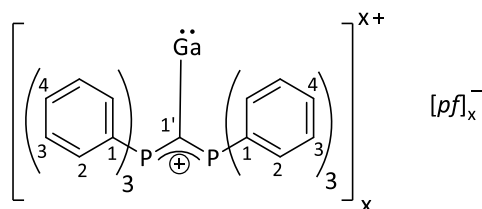

$^1\text{H-NMR}$  [400.17 MHz, *o*DFB, calibrated at  $\text{oC}_6\text{F}_2\text{H}_4 = 6.96$  ppm, 298 K]:  $\delta = 7.44$  (m, 18 H,  $\text{C}^2\text{H}$  and  $\text{C}^4\text{H}$ ), 7.32 (m, 12 H,  $\text{C}^3\text{H}$ ), small impurity, typically 12-14 %: 1.82 (t, 1 H,  $[\text{H}(\text{CDP}^{\text{Ph}})]^+$ ,  $^2J_{\text{H,P}} = 5.4$  Hz) ppm.

$^{13}\text{C-NMR}$  [75.48 MHz, *o*DFB, 298 K]:  $\delta = 137.5$  (s, 6 C,  $\text{C}^1$ ), 132.6 (s, 12 C,  $\text{C}^2\text{H}$ ), 128.9 (s, 12 C,  $\text{C}^3\text{H}$ ), 119.8 (12 C,  $[\text{Al}\{\text{OC}(\text{CF}_3)_3\}_4]^-$ ), 79.5 (4 C,  $[\text{Al}\{\text{OC}(\text{CF}_3)_3\}_4]^-$ ), 53.6 (t, 1 C,  $\text{C}^1\text{H}$ ,  $^1J_{\text{C}^1,\text{P}} = 64.5$  Hz) ppm.

$^{19}\text{F-NMR}$  [376.54 MHz,  $\text{oC}_6\text{F}_2\text{H}_4 = -139.5$  ppm, 298 K]:  $\delta = -75.3$  (s, 36 F,  $[\text{Al}\{\text{OC}(\text{CF}_3)_3\}_4]^-$ ) ppm

$^{27}\text{Al-NMR}$  [104.27 MHz, *o*DFB, 298 K]:  $\delta = 35.0$  (s, 1 Al,  $[\text{Al}\{\text{OC}(\text{CF}_3)_3\}_4]^-$ ) ppm.

$^{31}\text{P-NMR}$  [161.99 MHz, *o*DFB, 298 K]:  $\delta = 16.7$  (s, 2 P,  $[\text{Ga}\{\text{C}(\text{PPh}_3)_2\}]_x^{x+}$ ), small impurity, typically 12-14 %: 20.6 ( $[\text{H}\{\text{C}(\text{PPh}_3)_2\}]^+$ ) ppm.

$^{71}\text{Ga-NMR}$  [122.04 MHz, *o*DFB, 298 K]: no signal

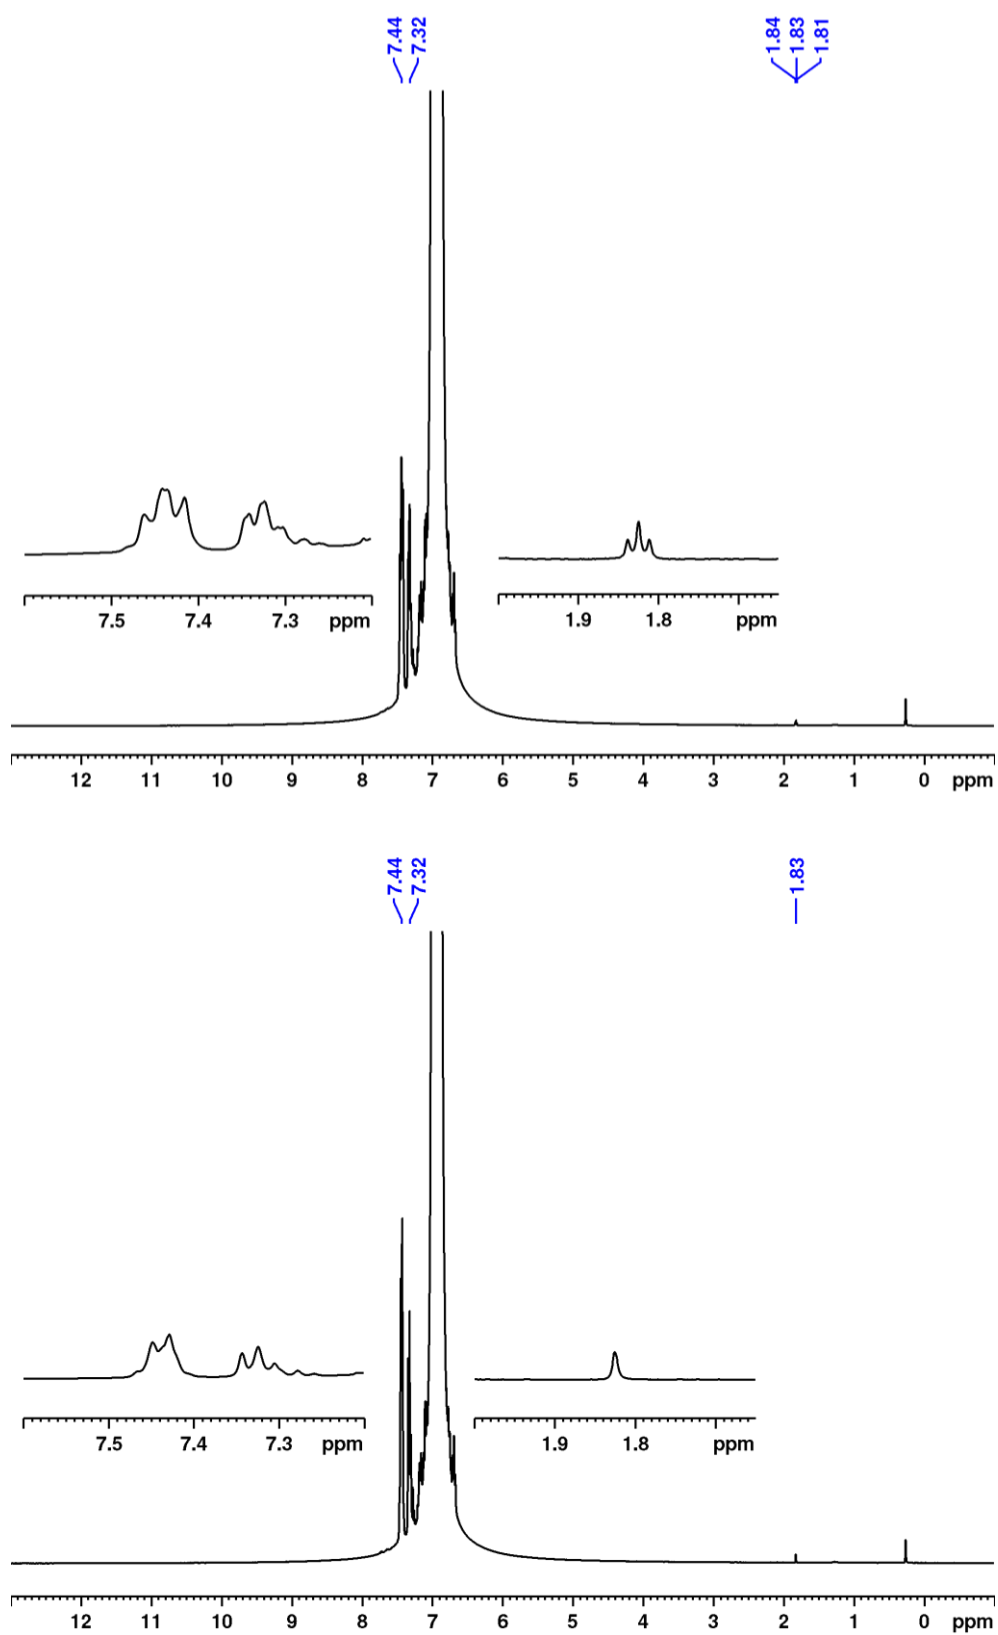

**Figure S 35:**  $^1\text{H}$ -NMR (top) and  $^1\text{H}\{^{31}\text{P}\}$  NMR (bottom) spectra (400.17 MHz, oDFB, 298 K) of a  $[\text{Ga}(\text{PhF})_2][\text{pf}]/\text{CDP}^{\text{Ph}}$  (1.0 : 1.0) mixture.

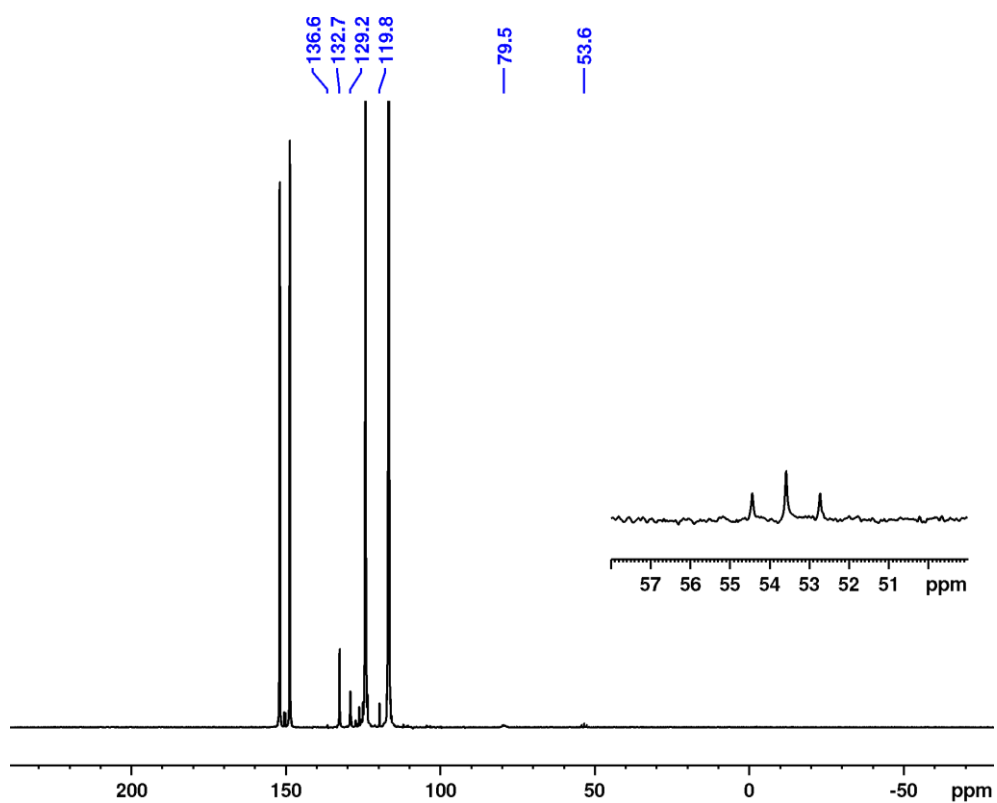

Figure S 36:  $^{13}\text{C}\{^1\text{H}\}$ -NMR spectrum (75.48 MHz, oDFB, 298 K) of crystalline  $[2][\text{pf}]_2$ .

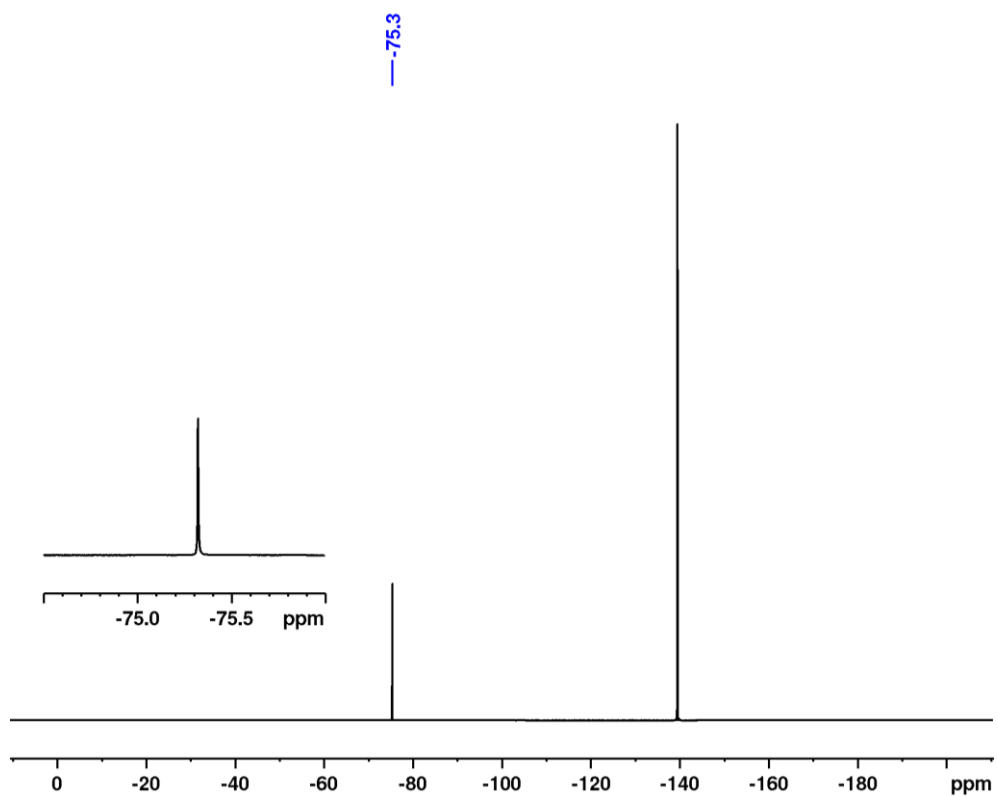

Figure S 37:  $^{19}\text{F}$ -NMR spectrum (376.54 MHz, oDFB, 298 K) of crystalline  $[2][\text{pf}]_2$ .

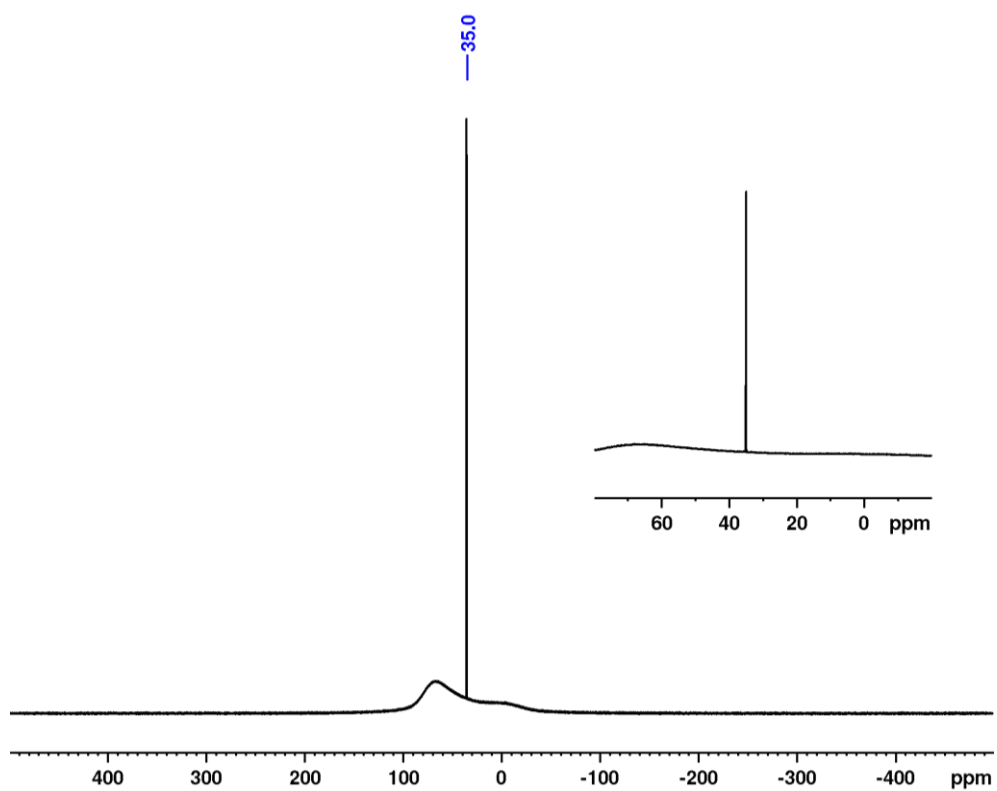

**Figure S 38:**  $^{27}\text{Al}$ -NMR spectrum (104.27 MHz, oDFB, 298 K) of crystalline  $[\mathbf{2}][\text{pf}]_2$ .

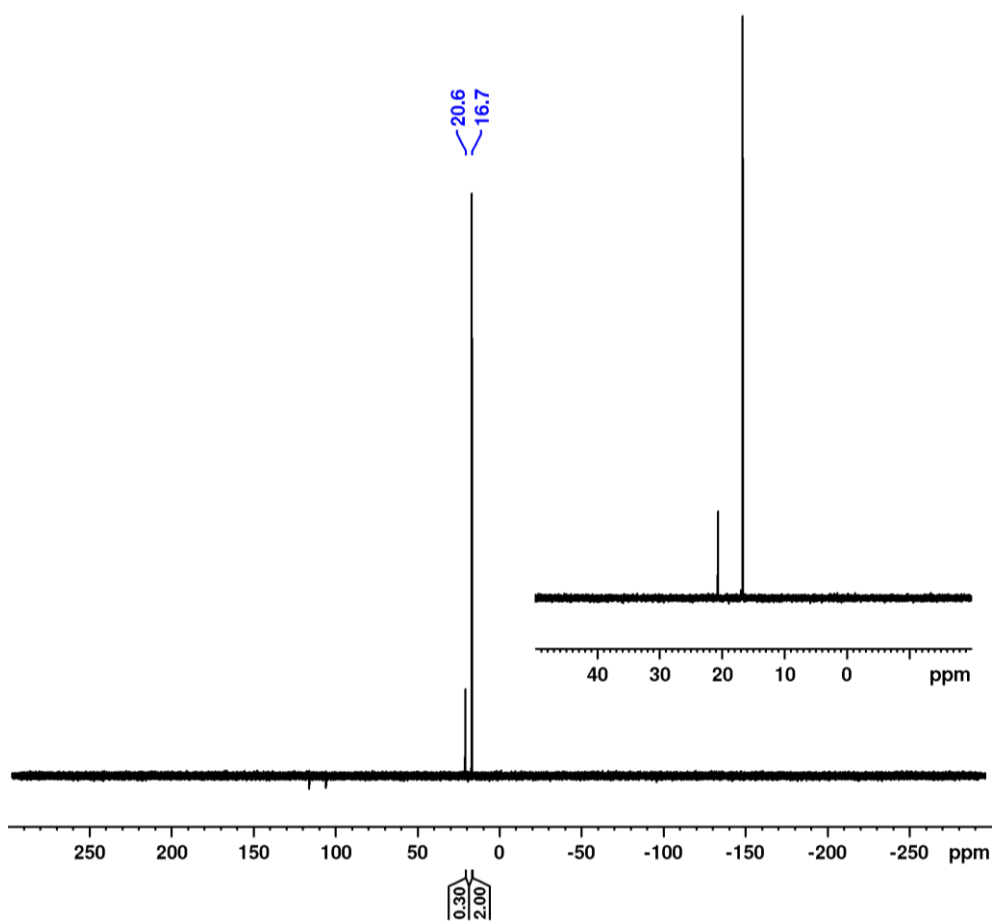

**Figure S 39:**  $^{31}\text{P}\{^1\text{H}\}$ -NMR spectrum (161.99 MHz, oDFB, 298 K) of crystalline  $[\mathbf{2}][\text{pf}]_2$ .

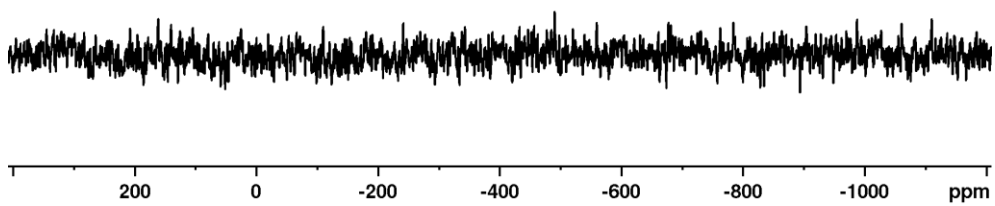

**Figure S 40:**  $^{71}\text{Ga}$ -NMR spectrum (122.04 MHz, oDFB, 298 K) of  $[\mathbf{2}][\text{pf}]_2$ .

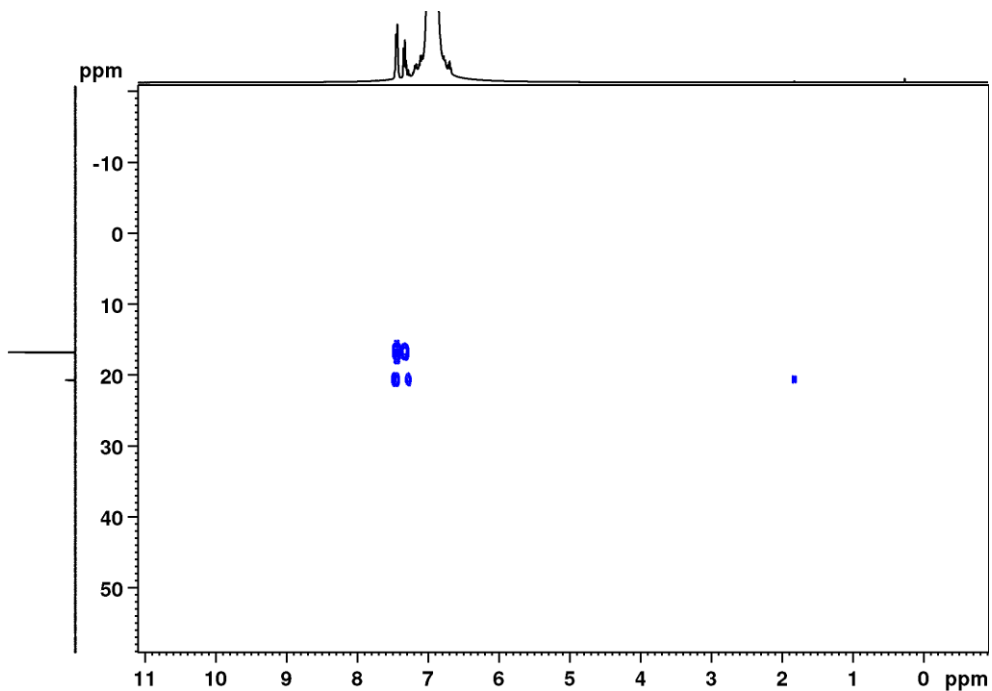

Figure S 41:  $^1\text{H}$ ,  $^{31}\text{P}$ -HMBC NMR spectrum (400.17 MHz, oDFB, 298 K, optimized for  $J = 15$  Hz) of crystalline  $[\mathbf{2}][\text{pf}]_2$ .

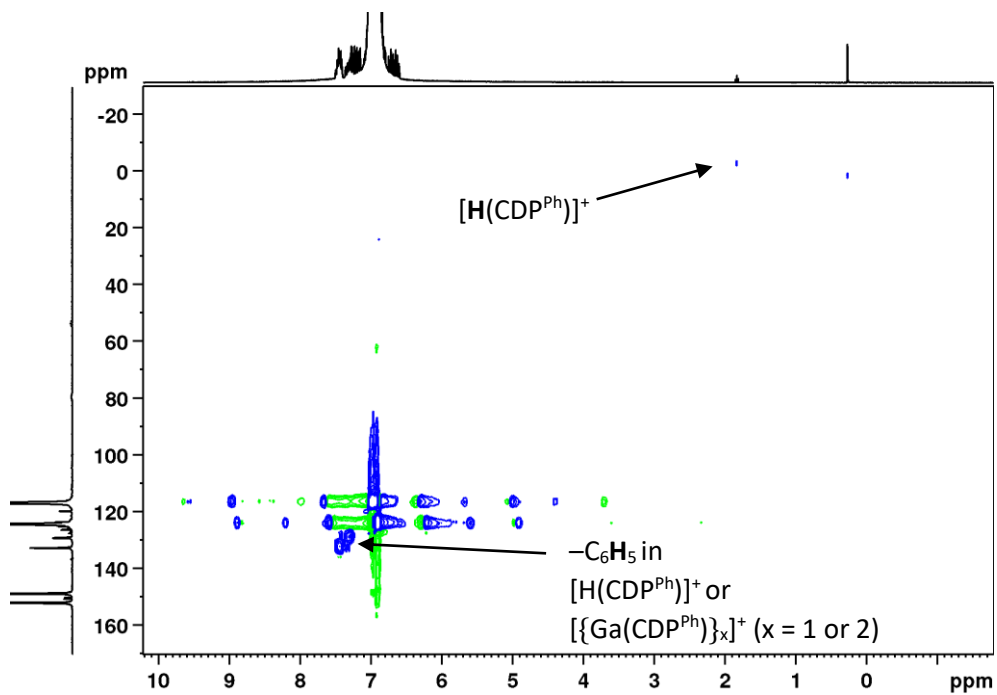

Figure S 42: Edited  $^1\text{H}$ ,  $^{13}\text{C}$ -HSQC NMR spectrum (300.18 MHz, oDFB, 298 K, optimized for  $J = 145$  Hz) of crystalline  $[\mathbf{2}][\text{pf}]_2$ .



## 5.7 Formation of $[H(CDP^{Ph})]^+$ in Solution

NMR spectroscopy revealed that, when dissolving crystals of  $\{[Ga(CDP^{Ph})_2][pf]_2\}$  ( $[2][pf]_2$ ) in *o*DFB, ca. 13 % of the  $CDP^{Ph}$  ligand is protonated to give  $[H(CDP^{Ph})]^+$ . Besides this, we also observed the immediate formation of a precipitate. The same applied when mixing  $[Ga(PhF)_2][pf]$  and  $CDP^{Ph}$  in a 1.0 : 1.0 ratio in a glove box and directly collecting the NMR spectra. Freezing the *o*DFB solution of  $[2][pf]_2$  at  $-78$  °C and thawing the sample in the NMR spectrometer did not have an effect on the concentration of  $[H(CDP^{Ph})]^+$  either. Photographs of  $[2][pf]_2$  solutions in *o*DFB, PhF and toluene are shown in **Figure S 43**. The phase boundaries in toluene and PhF indicate the formation of liquid clathrates. It has already been reported that mixing ionic liquids with electron-rich aromatic compounds like benzene or toluene leads to the spontaneous formation of three-dimensional networks of cations, anions and solvent molecules with limited miscibility in the aromatic solvent.<sup>[43]</sup>

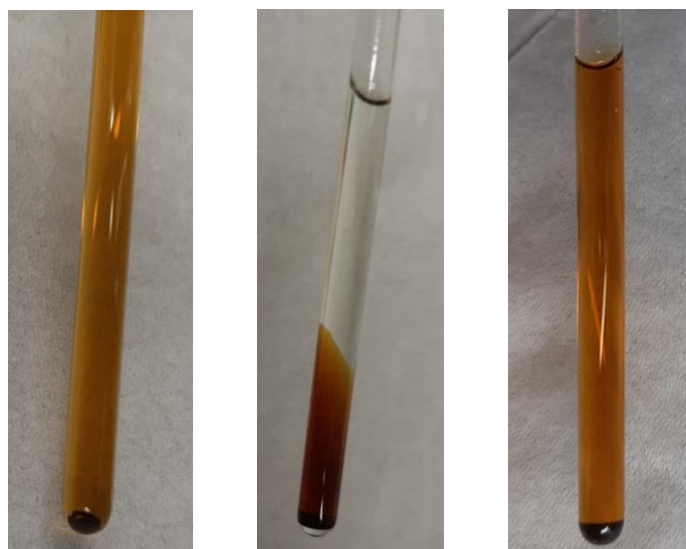

**Figure S 43:** Photographs of freshly prepared 1.0 : 1.0-mixtures of  $[Ga(PhF)_2][pf]$  and  $CDP^{Ph}$  in *o*DFB (left), toluene (middle) and in PhF (right).

The amount of protonated ligand is reproducibly formed in flame dried Young-valve NMR tubes, flame sealed NMR tubes, HMDS-treated Youngvalve NMR tubes as well as in PFA tubes. As a consequence, the Si–OH groups of the glass surface are probably not the proton sources. It is noteworthy that the amount of protonated carbodiphosphorane increases slowly over time, as 16 % of protonated ligand were detected after eleven days at rt in *o*DFB (**Figure S 44**). Protonated ligand is formed in various solvents; however, the exact amount of  $[H(CDP^{Ph})]^+$  formed is strongly solvent-dependant, as shown in **Table S 8**.

**Table S 8:** Amount of protonated carbodiphosphorane ligand observed *via*  $^{31}\text{P}$  NMR in various solvents. It should be noted that in PhF and toluene, the formation of various phases is observed, which adds uncertainty to the results for these solvents.

| Solvent      | Amount of $[\text{H}(\text{CDP}^{\text{Ph}})]^+$ (relative to the total concentration of P-containing species in solution) |
|--------------|----------------------------------------------------------------------------------------------------------------------------|
| <i>o</i> DFB | 11–14 %                                                                                                                    |
| PhF          | 6 %                                                                                                                        |
| Toluene      | 7 %                                                                                                                        |
| Diethylether | 48 %                                                                                                                       |
| Acetonitrile | >97 %                                                                                                                      |

Another conceivable proton-source is water. However, the solvents contained less than 8 ppm  $\text{H}_2\text{O}$ , according to Carl-Fischer titration. Additionally, it is important to note that the amount of  $[\text{H}(\text{CDP}^{\text{Ph}})]^+$  in *o*DFB is independent of the  $[\text{Ga}(\text{PhF})_2][\text{pf}]/\text{CDP}^{\text{Ph}}$ -concentration, since it does not significantly increase after dilution of a  $[\mathbf{2}][\text{pf}]_2$  solution with *o*DFB. This indicates that water or other impurities in the solvents most likely do not account for the formation of  $[\text{H}(\text{CDP}^{\text{Ph}})]^+$ . It should be noted that NMR spectra of  $\text{CDP}^{\text{Ph}}$  alone showed no signs of the protonation product or significant amounts of other side products in aromatic solvents (**Figure S 31–Figure S 33**). As a consequence, the formation of the protonated ligand must be related to the addition of gallium ions. In fact, our experiments show that the presence of the gallium ions alters the reactivity of  $\text{CDP}^{\text{Ph}}$ . This is underlined by the fact that pure  $\text{CDP}^{\text{Ph}}$  is hydrolyzed in the presence of water, giving  $\text{Ph}_2\text{P}(\text{O})\text{CH}=\text{PPh}_3$ ,<sup>[28]</sup> while addition of water to a  $[\mathbf{2}][\text{pf}]_2$  solution resulted in formation of protonated ligand  $[\text{H}(\text{CDP}^{\text{Ph}})]^+$ . Besides this, we observed complete protonation of the ligand in acetonitrile-solutions of  $[\text{Ga}(\text{PhF})_2][\text{pf}]/\text{CDP}^{\text{Ph}}$  (1.0 : 1.0), whereas  $\text{CDP}^{\text{Ph}}$  showed no signs of protonation in acetonitrile since it is completely insoluble in this solvent. The strongly  $\sigma$ - and  $\pi$ -donating carbodiphosphorane could in part lead to the disproportionation of univalent gallium ions in solution, resulting in the formation of  $\text{Ga}^{\text{III}}$  and of elemental  $\text{Ga}^0$ , accounting for the precipitate. The thereby generated  $\text{Ga}^{\text{III}}$  ions would be much stronger Lewis acids and increase the reactivity of the superbasic  $\text{CDP}^{\text{Ph}}$ .

While the  $^1\text{H}$ -signal of  $[\text{H}(\text{CDP}^{\text{Ph}})]^+$  in toluene- $d_8$  is as intensive as in non-deuterated toluene (**Figure S 46** and **Figure S 47**),  $[\text{D}(\text{CDP}^{\text{Ph}})]^+$  unambiguously forms in acetonitrile- $d_3$ . It follows from the  $^{31}\text{P}$  NMR and the  $^1\text{H}$ - $^{31}\text{P}$  HMBC in acetonitrile- $d_3$  that  $[\text{H}(\text{CDP}^{\text{Ph}})]^+$  is formed. However, the intensity ratio of the  $[\text{H}(\text{CDP}^{\text{Ph}})]^+$  signal and of the aromatic protons is ca. 1 : 620 (instead of 1 : 30; **Figure S 50**), clearly underlining that the majority of the ligand is deuterated instead of protonated. Additionally, the  $^{13}\text{C}$  NMR signal of the central  $\text{C}^{\text{CDP}}$  shows (**Figure S 52**) a triplet coupling pattern to  $^{31}\text{P}$  ( $^1J=124.9$  Hz) and to  $^2\text{D}$  ( $^1J=23.7$  Hz). Thus, we were able to show that cationic Gallium- $\text{CDP}^{\text{Ph}}$  complexes are able to activate C–D and C–H bonds in solution.

As a consequence, we suggest that the species  $[\text{H}(\text{CDP}^{\text{Ph}})]^+$  in *o*DFB is generated either by a bond activation of the solvent or, more likely, by an intra- or intermolecular C–H bond activation of the ligand in  $\mathbf{2}^{2+}$  (or the monomeric species  $[\text{Ga}(\text{CDP}^{\text{Ph}})]^+$ ) and that the side products of this reaction precipitate, so that they cannot be observed by NMR spectroscopy. As already pointed out, the simultaneous presence of a Lewis acidic  $\text{Ga}^+$  ion and of the super basic  $\text{CDP}^{\text{Ph}}$  ligand is pivotal for the protonation of the ligand. Therefore, a frustrated Lewis pair mechanism, involving  $\text{CDP}^{\text{Ph}}$  and a  $\text{Ga}^+$ -solvent complex, may be operative.<sup>[44]</sup> Since the amount of protonated ligand is higher in donor-solvents, *i.e.* diethylether and acetonitrile (**Table S 8**) it is reasonable to assume that these solvents coordinate strongly to monomeric  $[\text{Ga}(\text{CDP}^{\text{Ph}})]^+$ , which increases the reactivity. The fact that the formation of the protonated ligand is less pronounced in toluene, PhF or *o*DFB may indicate that  $\mathbf{2}^{2+}$  exists as a dimer in these aromatic solvents.

Interestingly, in *o*DFB, the amount of  $[\text{H}(\text{CDP}^{\text{Ph}})]^+$  is virtually identical in the reaction solutions of  $[\text{Ga}(\text{PhF})_2][\rho f]/\text{CDP}^{\text{Ph}}$ , in the supernatant solution over  $[\mathbf{2}][\rho f]_2$  crystals and in solutions of dissolved  $[\mathbf{2}][\rho f]_2$  crystals. Therefore, it cannot be ruled out that crystals of  $[\mathbf{2}][\rho f]_2$  are obtained in pure form, but cannot easily be dissolved in a solvent without decomposition. The powder diffraction results (section 4) may suggest that the  $[\mathbf{2}][\rho f]_2$  crystals are not phase pure; however, as already discussed, it is conceivable that trituration of the sample leads to structural changes, especially when taking into account the very weak GaGa double bond.

To conclude, the high basicity of the carbodiphosphorane and its increased reactivity in the presence of  $\text{Ga}^+$  or  $\text{Ga}^{3+}$  probably prevents a clean synthesis of  $[\mathbf{2}][\rho f]_2$  in various solvents and maybe also in the solid state. The exact mechanism of the formation of  $[\text{H}(\text{CDP}^{\text{Ph}})]^+$  and the nature of the proton source is not understood yet. Investigations in this direction are hampered by the formation of various phases in solutions (in PhF and toluene) and of a precipitate.

It is well known that carbodiphosphoranes and carbodiphosphorane complexes are highly basic and thus readily protonated, *e.g.* when using halogenated hydrocarbons as solvents.<sup>[45]</sup> Generally, bond activation with carbodiphosphorane complexes are well known. For example, C–H activations in the *ortho* position of phenyl rings of  $\text{CDP}^{\text{Ph}}$  ligands have been reported for both transition metal complexes and main group adducts with  $\text{CDP}^{\text{Ph}}$  ligands (*e.g.*  $\text{CDP}^{\text{Ph}}\text{-Rh}$ ,<sup>[46,47]</sup>  $\text{CDP}^{\text{Ph}}\text{-Pt}$ <sup>[46–48]</sup> and  $\text{CDP}^{\text{Ph}}\text{-P}$  complexes).<sup>[49]</sup>

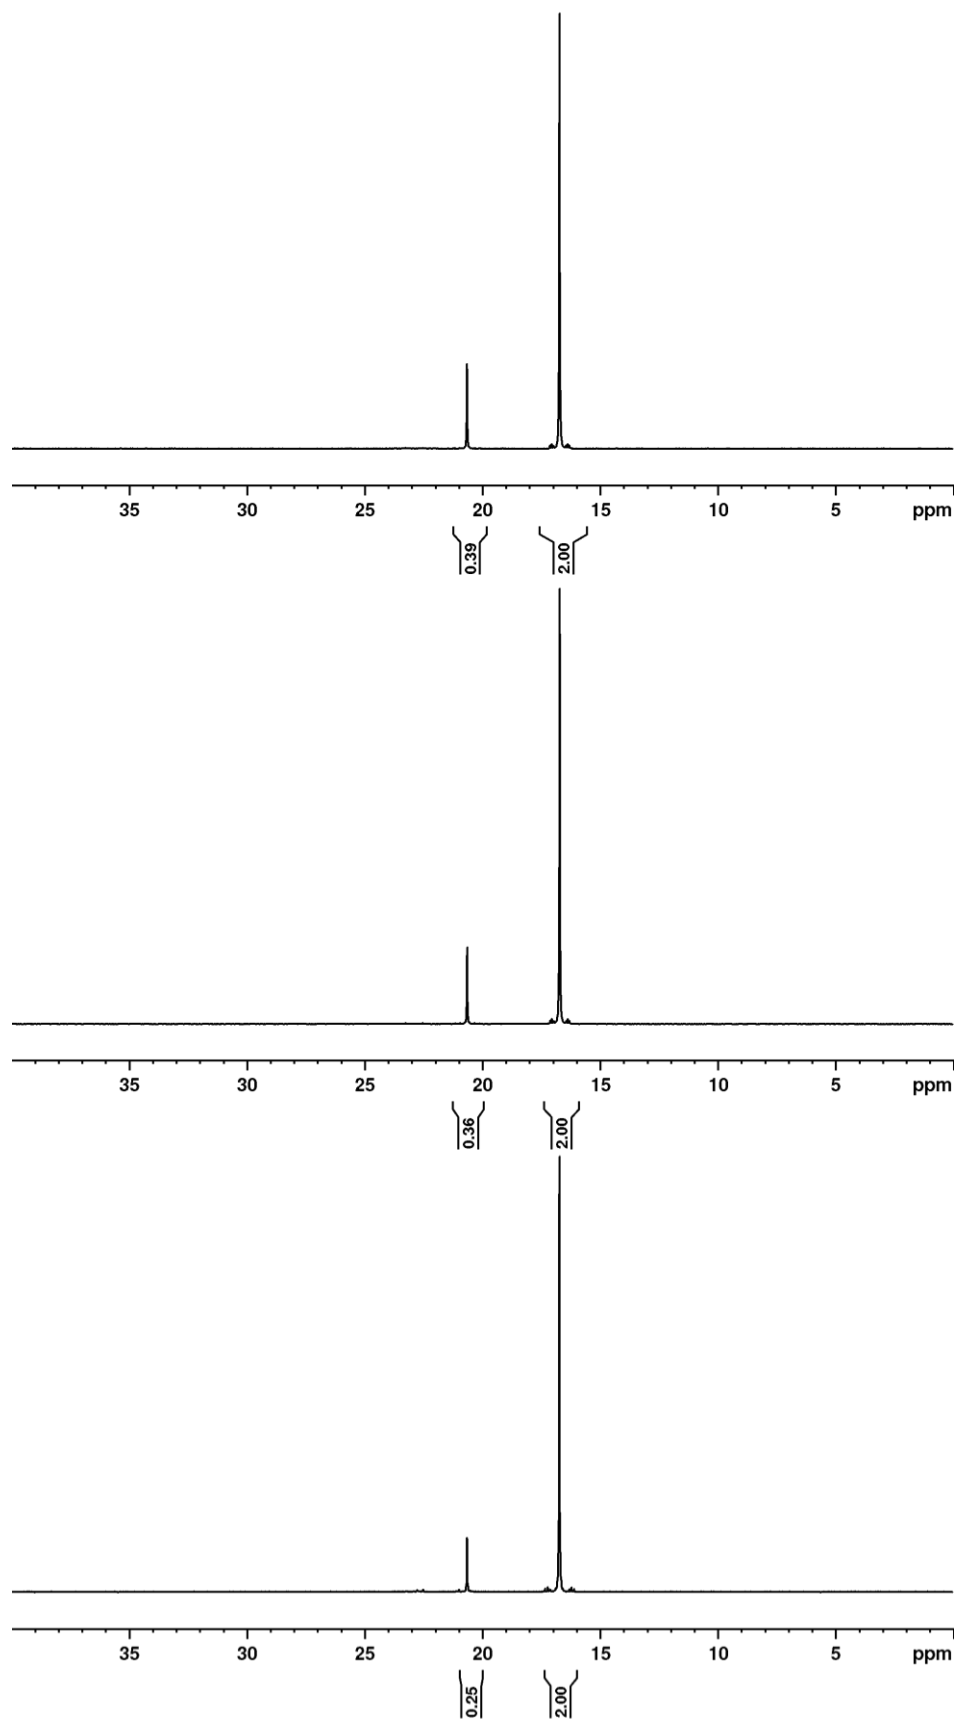

**Figure S 44:** From bottom to top:  $^{31}\text{P}\{^1\text{H}\}$  NMR spectrum (81.01 MHz, oDFB, 298 K),  $^{31}\text{P}\{^1\text{H}\}$  NMR spectrum (121.52 MHz, oDFB, 298 K) and  $^{31}\text{P}\{^1\text{H}\}$  NMR spectrum (81.01 MHz, oDFB, 298 K) of a mixture of  $[\text{Ga}(\text{PhF})_2][\text{pf}]$  and  $\text{CDP}^{\text{Ph}}$  (1.0 : 1.0) directly after mixing the components, 2 days after mixing the components and 3 months after mixing the components, respectively.

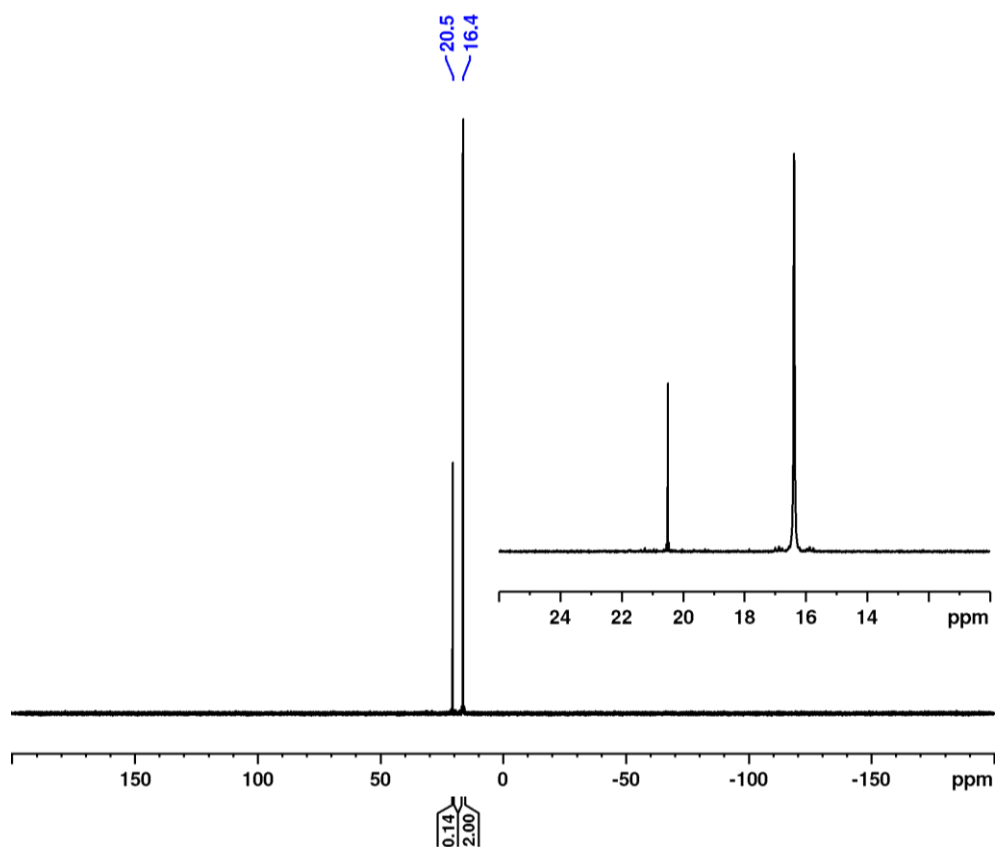

**Figure S 45:**  $^{31}\text{P}\{^1\text{H}\}$ -NMR spectrum (81.01 MHz, PhF, 298 K) of a mixture of  $[\text{Ga}(\text{PhF})_2][\text{pf}]$  and  $\text{CDP}^{\text{Ph}}$  (1.0 : 1.0).

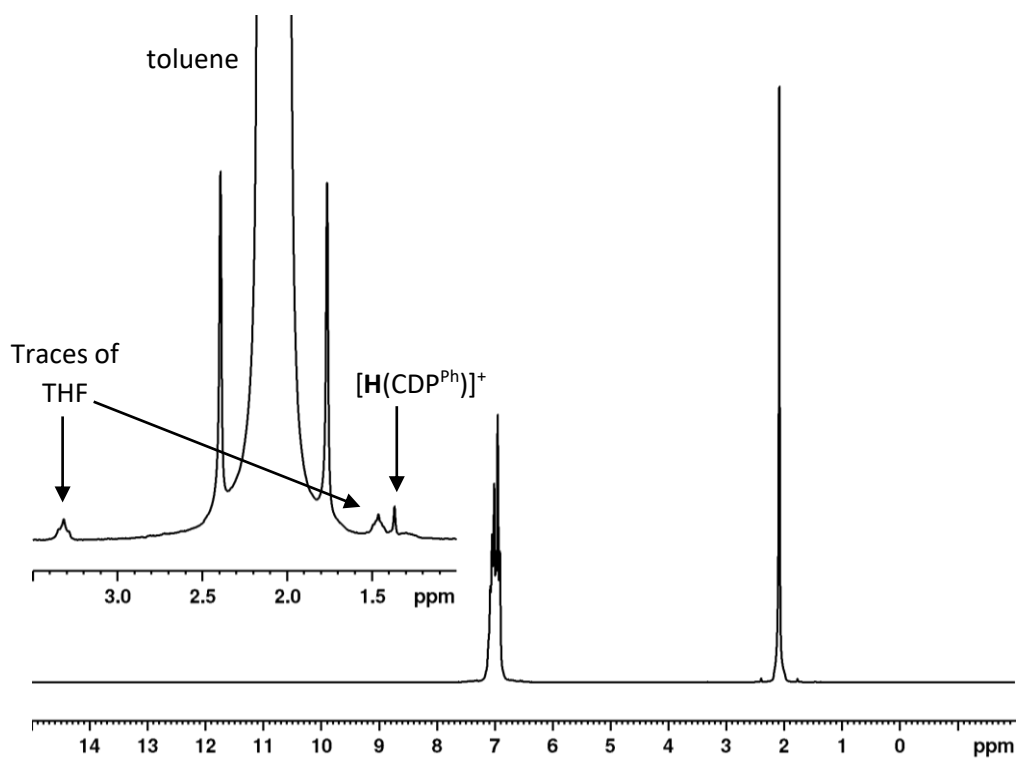

**Figure S 46:**  $^1\text{H}\{^{31}\text{P}\}$ -NMR spectrum (200.13 MHz, toluene, 298 K) of a mixture of  $[\text{Ga}(\text{PhF})_2][\text{pf}]$  and  $\text{CDP}^{\text{Ph}}$  (1.0 : 1.0; spectrum).

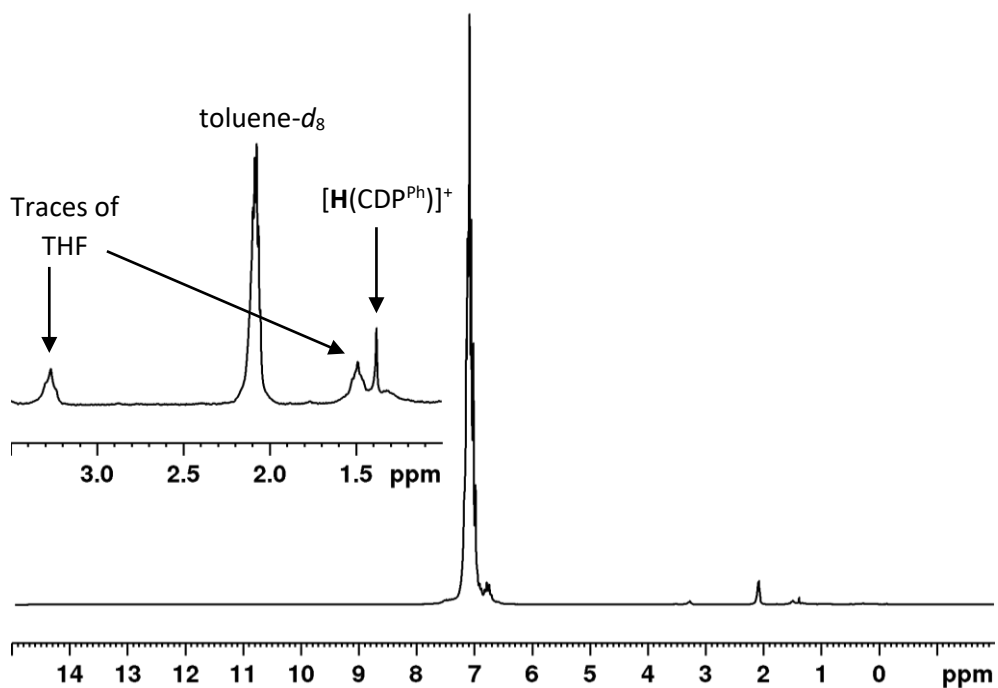

**Figure S 47:**  $^1\text{H}\{^{31}\text{P}\}$ -NMR spectrum (200.13 MHz, toluene- $d_8$ , 298 K) of a mixture of  $[\text{Ga}(\text{PhF})_2][\text{pf}]$  and  $\text{CDP}^{\text{Ph}}$  (1.0 : 1.0).

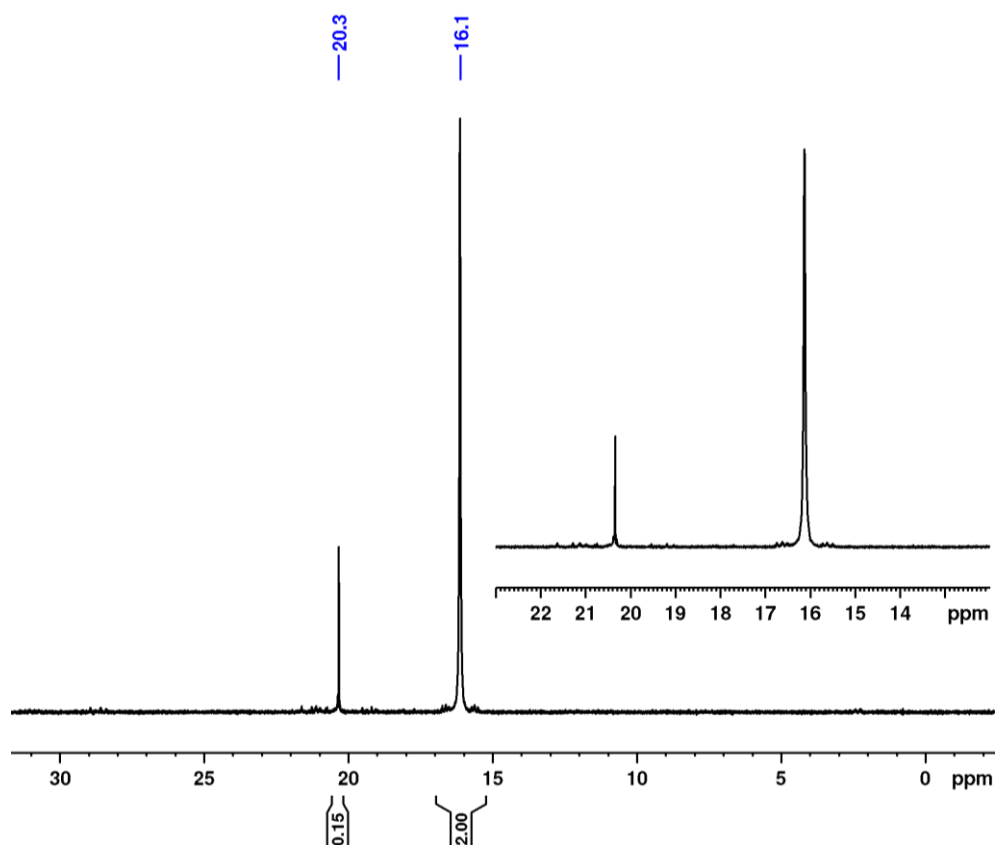

**Figure S 48:**  $^{31}\text{P}\{^1\text{H}\}$ -NMR spectrum (81.01 MHz, toluene- $d_8$ , 298 K) of a mixture of  $[\text{Ga}(\text{PhF})_2][\text{pf}]$  and  $\text{CDP}^{\text{Ph}}$  (1.0 : 1.0).

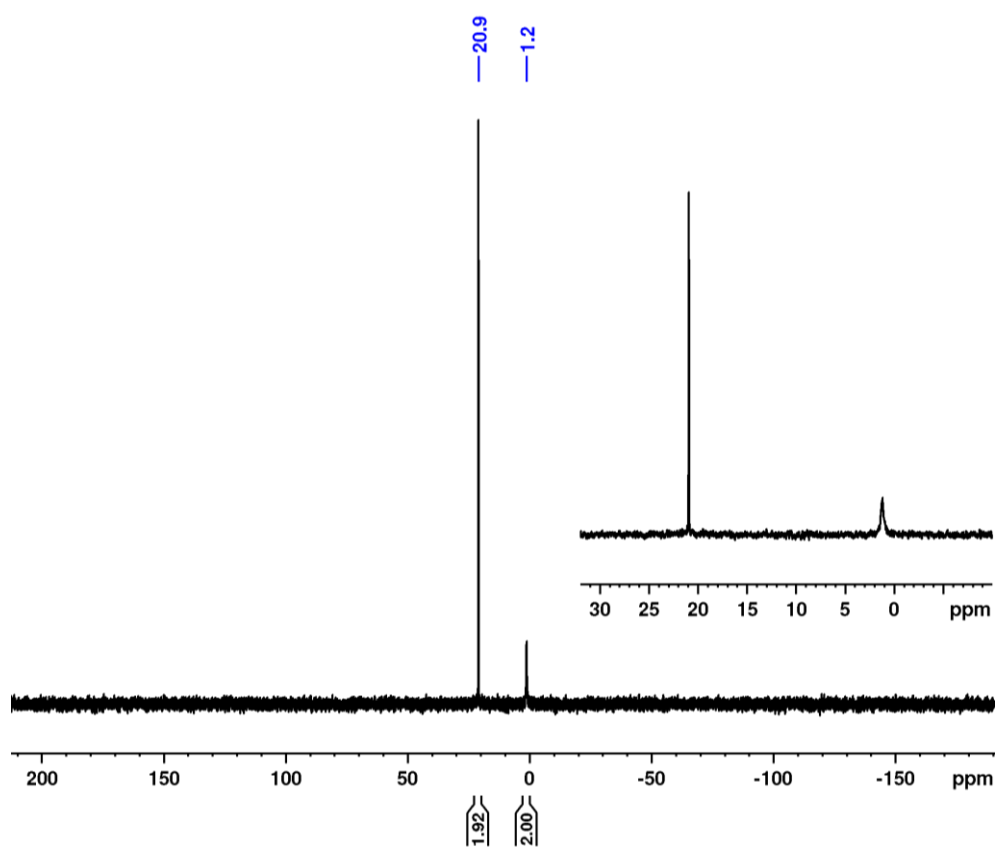

**Figure S 49:**  $^{31}\text{P}\{^1\text{H}\}$ -NMR spectrum (121.52 MHz,  $\text{Et}_2\text{O}$ , 298 K) of a  $[\text{Ga}(\text{PhF})_2][\text{pf}]/\text{CDP}^{\text{Ph}}$  (1.0 : 1.0) mixture.

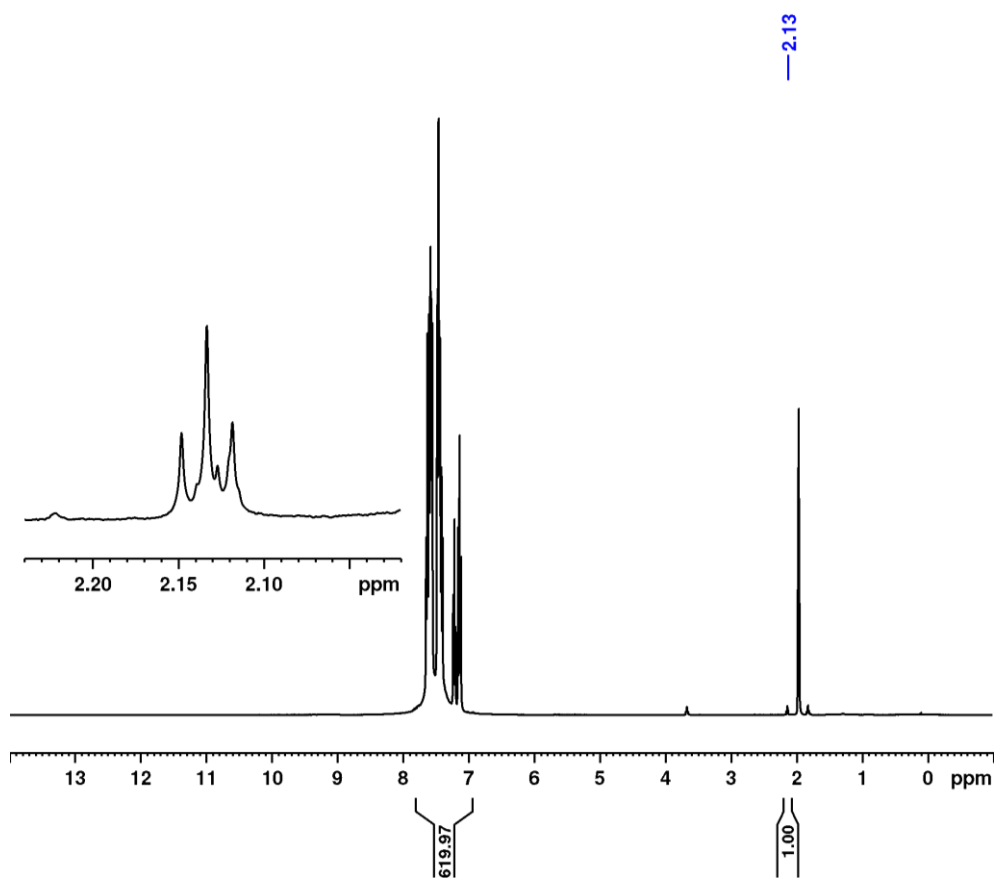

**Figure S 50:**  $^1\text{H}$ -NMR spectrum (400.17 MHz, acetonitrile- $d_3$ , 298 K) of a  $[\text{Ga}(\text{PhF})_2][\text{pf}]/\text{CDP}^{\text{Ph}}$  (1.0 : 1.0) mixture.

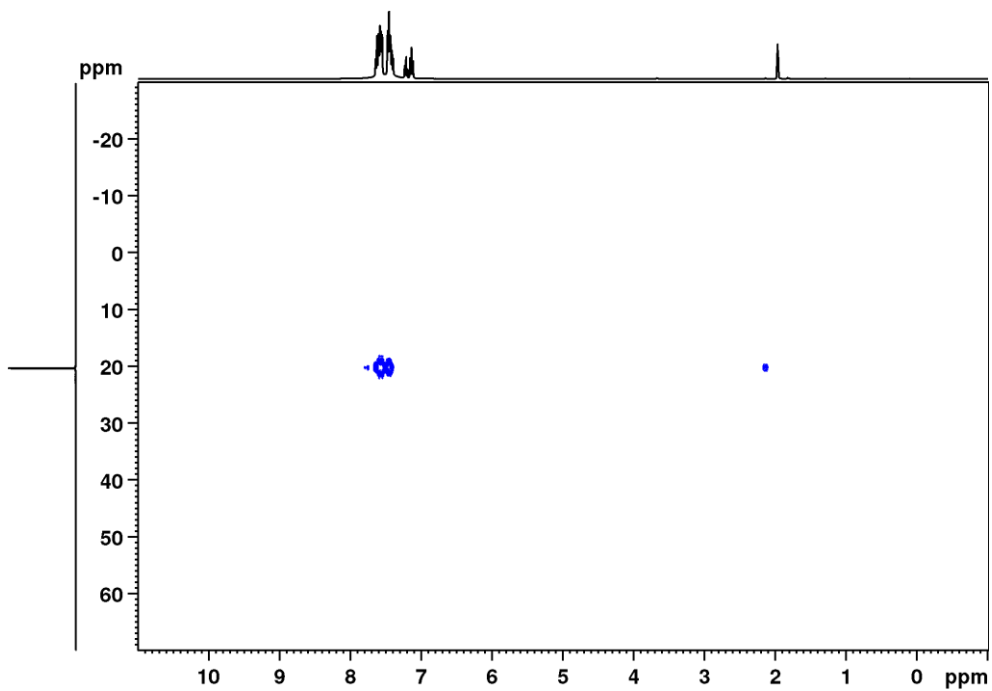

**Figure S 51:**  $^1\text{H}$ ,  $^{31}\text{P}$ -HMBC NMR spectrum (400.17 MHz, acetonitrile- $d_3$ , 298 K, optimized for  $J = 15$  Hz) of a  $[\text{Ga}(\text{PhF})_2][\text{pf}]/\text{CDP}^{\text{Ph}}$  (1.0 : 1.0) mixture.



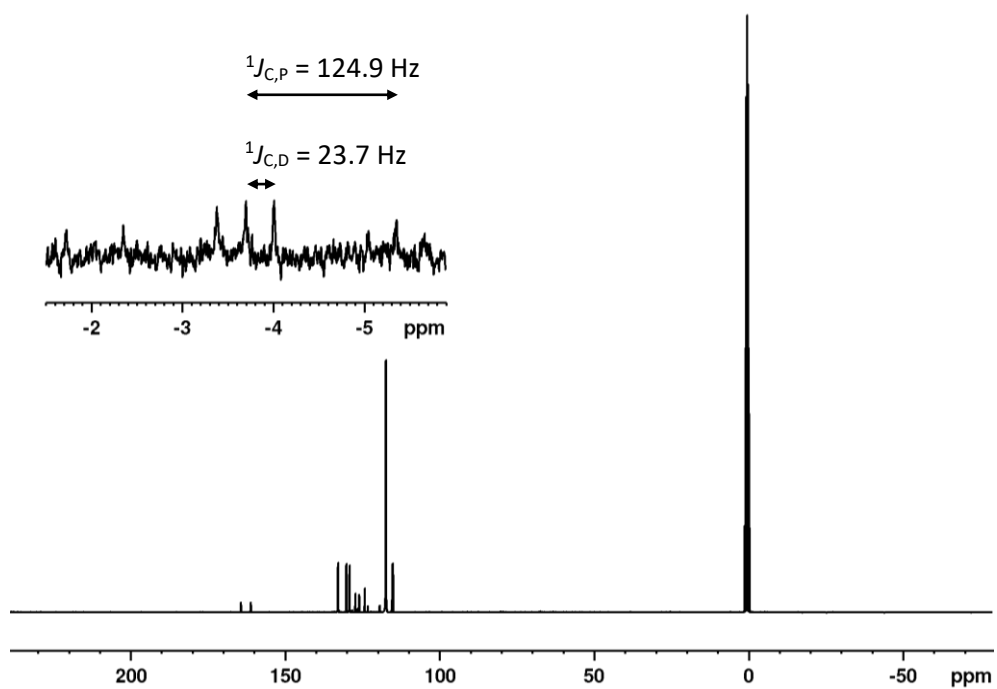

**Figure S 52:**  $^{13}\text{C}\{^1\text{H}\}$ -NMR spectrum (75.48 MHz, acetonitrile- $d_3$ , 298 K) of a  $[\text{Ga}(\text{PhF})_2][\text{pf}]/\text{CDP}^{\text{Ph}}$  (1.0 : 1.0) mixture. The enlarged part of the spectrum (top left) shows the coupling pattern of the  $^{13}\text{C}$  signal of the central  $\text{C}^{\text{CDP}}$ .

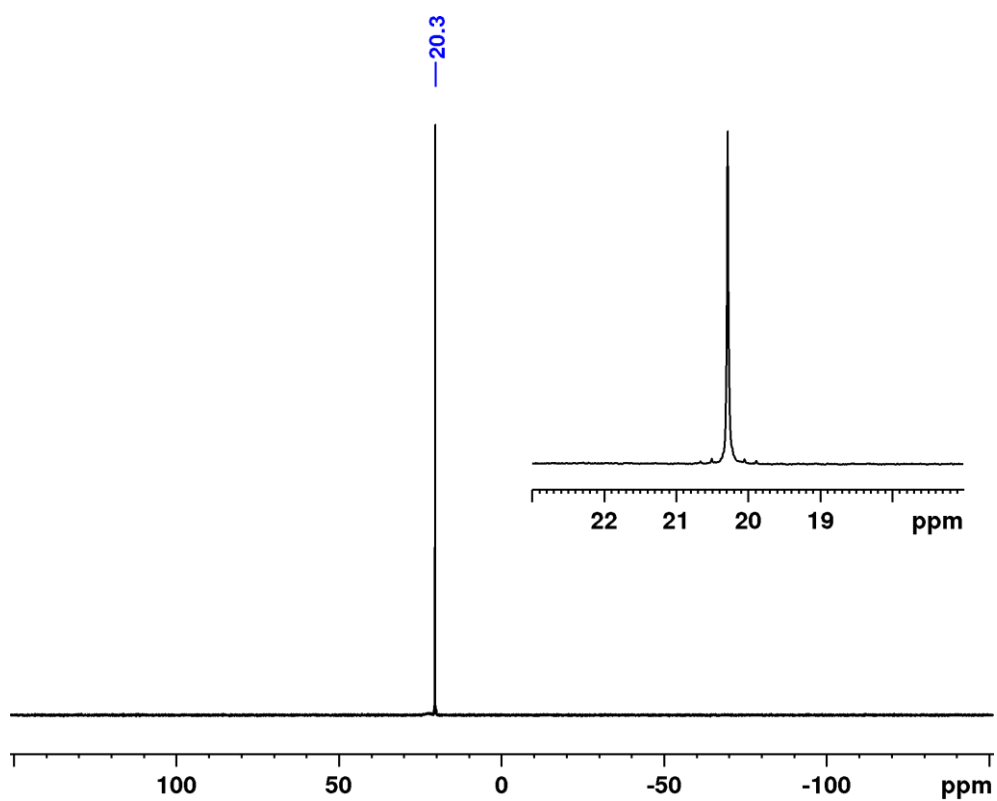

**Figure S 53:**  $^{31}\text{P}\{^1\text{H}\}$ -NMR spectrum (161.99 MHz, acetonitrile- $d_3$ , 298 K) of a  $[\text{Ga}(\text{PhF})_2][\text{pf}]/\text{CDP}^{\text{Ph}}$  (1.0 : 1.0) mixture.

## 5.8 Comparison of NMR shifts and Coupling Constants in CDP<sup>Ph</sup> and

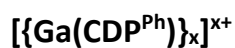

The different chemical shifts and coupling constants in **Table S 9** and **Table S 10** clearly confirm that CDP<sup>Ph</sup> coordinates to Ga<sup>+</sup> in solution.

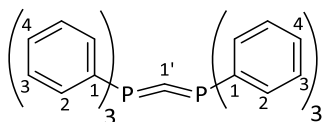

**Table S 9:** Chemical shifts and coupling constants for CDP<sup>Ph</sup> in oDFB.

| Group | $\delta(^1\text{H})$<br>[ppm] | $\delta(^{13}\text{C})$<br>[ppm] | $\delta(^{31}\text{P})$<br>[ppm] | $J_{\text{H,P}}$                        | $J_{\text{C,P}}$                          | $J_{\text{P,P}}$            |
|-------|-------------------------------|----------------------------------|----------------------------------|-----------------------------------------|-------------------------------------------|-----------------------------|
| 1     | -                             | 137.5                            | -                                | -                                       | $^1J_{\text{C}^1,\text{P}} = 48.0$ Hz     | -                           |
| 2     | 7.76                          | 132.1                            | -                                | $^2J_{\text{C}^2,\text{H,P}} = 12.4$ Hz | $^2J_{\text{C}^2,\text{P}} = 5.3$ Hz      | -                           |
| 3     | 7.20                          | 129.0                            | -                                | not resolved                            | $^3J_{\text{C}^3,\text{P}} = 5.9$ Hz      | -                           |
| 4     | 7.13                          | 127.3                            | -                                | not resolved                            | $^4J_{\text{C}^4,\text{P}} = 1.4$ Hz      | -                           |
| 1'    | -                             | 12.4                             | -                                | -                                       | $^1J_{\text{C}^{1'},\text{P}} = 121.0$ Hz | -                           |
| P     | -                             | -                                | -3.9                             | -                                       | -                                         | $^2J_{\text{P,P}} = 9.0$ Hz |

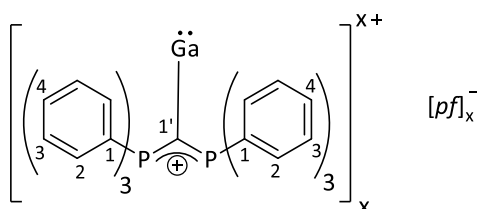

**Table S 10:** Chemical shifts and coupling constants for [{Ga(CDP<sup>Ph</sup>)<sub>x</sub>}][PF<sub>6</sub>]<sub>x</sub> (x = 1 or 2) in oDFB.

| Group | $\delta(^1\text{H})$<br>[ppm] | $\delta(^{13}\text{C})$<br>[ppm] | $\delta(^{31}\text{P})$<br>[ppm] | $J_{\text{H,P}}$ | $J_{\text{C,P}}$                         | $J_{\text{P,P}}$            |
|-------|-------------------------------|----------------------------------|----------------------------------|------------------|------------------------------------------|-----------------------------|
| 1     | -                             | 137.5                            | -                                | -                | $^1J_{\text{C}^1,\text{P}} = 90.5$ Hz    | -                           |
| 2     | 7.44                          | 132.6                            | -                                | not resolved     | not resolved                             | -                           |
| 3     | 7.32                          | 128.9                            | -                                | not resolved     | not resolved                             | -                           |
| 4     | 7.44                          | not detected                     | -                                | not resolved     | not resolved                             | -                           |
| 1'    | -                             | 53.6                             | -                                | -                | $^1J_{\text{C}^{1'},\text{P}} = 64.5$ Hz | -                           |
| P     | -                             | -                                | 16.7                             | -                | -                                        | $^2J_{\text{P,P}} = 8.9$ Hz |

## 5.9 DOSY Measurements

DOSY-NMR spectra with a stimulated echo impulse sequence were measured for solutions of LiNacNac<sup>Mes</sup>,  $[\{\text{Ga}(\text{NacNac}^{\text{Mes}})\}_2][\text{pf}]_2 \cdot 1.5\text{oDFB}$  ( $[\mathbf{1}][\text{pf}]_2 \cdot 1.5\text{oDFB}$ ) and  $[\{\text{Ga}(\text{CDP}^{\text{Ph}})\}_2][\text{pf}]_2$  ( $[\mathbf{2}][\text{pf}]_2$ ) in oDFB at rt. Calibration of the diffusion coefficients was performed with respect to a solution of D<sub>2</sub>O (98.9 %), H<sub>2</sub>O (1 %), MeOH (0.1 %) and GdCl<sub>3</sub> (0.1 mg).<sup>[50]</sup> The results are summarized in **Table S 11**.

**Table S 11:** Diffusion coefficients of different species in an oDFB solution at rt. Diffusion coefficients were determined with <sup>1</sup>H DOSY NMR experiments (for LiNacNac<sup>Mes</sup> and  $\mathbf{1}^{2+}$ ), <sup>19</sup>F DOSY NMR experiments (for the  $[\text{pf}]^-$  anion) and <sup>31</sup>P DOSY NMR experiments (for the CDP<sup>Ph</sup> complexes).

| Entry | Species                                                       | Diffusion Coefficient [ $10^{-10} \text{ m}^2 \text{ s}^{-1}$ ] |
|-------|---------------------------------------------------------------|-----------------------------------------------------------------|
| 1     | LiNacNac <sup>Mes</sup>                                       | 6.433±0.003                                                     |
| 2     | $\mathbf{1}^{2+}$                                             | 4.503±0.002                                                     |
| 3     | $[\text{H}(\text{CDP}^{\text{Ph}})]^+$                        | 1.004±0.002 <sup>a)</sup>                                       |
| 4     | $[\{\text{Ga}(\text{CDP}^{\text{Ph}})\}_x]^{x+}$ (x = 1 or 2) | 1.084±0.001 <sup>a)</sup>                                       |
| 5     | $[\text{pf}]^-$                                               | 6.438±0.008 <sup>a)</sup>                                       |

a) <sup>19</sup>F and <sup>31</sup>P DOSY NMR measured in the same NMR sample of crystalline  $[\mathbf{2}][\text{pf}]$  in oDFB.

It follows from the diffusion coefficients of LiNacNac<sup>Mes</sup> and  $\mathbf{1}^{2+}$  (entry 1 and 2 in **Table S 11**) that the intact dimer  $\mathbf{1}^{2+}$  exists in solution, which is in line with quantum chemical calculations (section 8.1).

The dissociation behavior of  $\mathbf{2}^{2+}$  is more ambiguous. On the one hand, the diffusion coefficients obtained for the side product  $[\text{H}(\text{CDP}^{\text{Ph}})]^+$  and the putative  $\mathbf{2}^{2+}$  or  $[\text{Ga}(\text{CDP}^{\text{Ph}})]^+$  (entry 3 and 4 in **Table S 11**) are very similar, which may suggest that monomeric  $[\text{Ga}(\text{CDP}^{\text{Ph}})]^+$  is present in oDFB. On the other hand, the diffusion coefficient of the Ga-CDP<sup>Ph</sup> complex is significantly smaller than the diffusion coefficient of the  $[\text{pf}]^-$  anion (entry 4 and 5 in **Table S 11**). The thermochemical volumes found in the solid state for the  $[\text{pf}]^-$  anion (ca. 720 Å<sup>3</sup>, on the basis of the volumes for the alkali metal-*pf* salts)<sup>[51]</sup> and for  $\mathbf{2}^{2+}$  (ca. 1460 Å<sup>3</sup> as calculated from the latter value and the volume for  $[\mathbf{2}][\text{pf}]_2$ , see **Table S 1**) clearly are in better agreement with the dimer in solution. It cannot be ruled out that the CDP<sup>Ph</sup> ligands in  $[\text{H}(\text{CDP}^{\text{Ph}})]^+$  and  $[\{\text{Ga}(\text{CDP}^{\text{Ph}})\}_x]^{x+}$  (x = 1 or 2) undergo ligand exchange or that monomeric  $[\text{Ga}(\text{CDP}^{\text{Ph}})]^+$  and dimeric  $\mathbf{2}^{2+}$  are in chemical equilibrium, which stresses the need to be cautious about the interpretation of these diffusion coefficients. Thus, the <sup>31</sup>P-DOSY experiments did not allow to clarify whether  $\mathbf{2}^{2+}$  dissociates in solution, while quantum chemical calculations suggest that monomer and dimer are similarly stable in oDFB, but that the dimerization is thermodynamically slightly favored (section 8.1).

## 6 Vibrational Spectroscopy

In **Figure S 54–Figure S 58**, the experimental vibrational spectra of  $[\{\text{Ga}(\text{NacNac}^{\text{Mes}})\}_2][\text{pf}]_2 \cdot 1.5\text{oDFB}$  ( $[\mathbf{1}][\text{pf}]_2 \cdot 1.5\text{oDFB}$ ),  $[\{\text{Ga}(\text{CDP}^{\text{Ph}})\}_2][\text{pf}]_2$  ( $[\mathbf{2}][\text{pf}]_2$ ) and  $[\text{In}(\text{CDP}^{\text{Ph}})][\text{pf}]$  are compared with the calculated spectra of the cations, calculated spectra of possible cationic side products and the experimental spectra of  $\text{NO}[\text{pf}]$ . The spectrum of  $\text{NO}[\text{pf}]$  is displayed in order to show the vibrations dedicated to the anion.

### 6.1 $[\{\text{Ga}(\text{NacNac}^{\text{Mes}})\}_2][\text{pf}]_2 \cdot 1.5\text{oDFB}$ ( $[\mathbf{1}][\text{pf}]_2 \cdot 1.5\text{oDFB}$ )

**IR (Diamond-ATR):**  $\tilde{\nu}$  [ $\text{cm}^{-1}$ ] = 3615 (vw), 3408 (vw), 2931 (vw), 1648 (vw), 1609 (vw), 1546 (vw), 1517 (vw), 1478 (vw), 1442 (vw), 1350 (vw), 1298 (w), 1274 (m), 1240 (m), 1211 (vs), 1171 (w), 1034 (vw), 1026 (vw), 970 (vs), 889 (vw), 857 (vw), 831 (vw), 755 (vw), 726 (vs), 662 (vw), 560 (vw), 536 (w), 443 (w), 415 (vw). **FT-Raman:**  $\tilde{\nu}$  [ $\text{cm}^{-1}$ ] = 3034 (vw), 2939 (vw), 2750 (vw), 2124 (vw), 1676 (vw), 1610 (vw), 1478 (vw), 1386 (vw), 1309 (w), 1226 (vw), 1159 (vw), 970 (vw), 797 (w), 745 (w), 646 (w), 575 (m), 528 (m), 412 (m), 363 (m), 321 (s), 285 (s), 215 (s), 138 (s), 104 (vs).

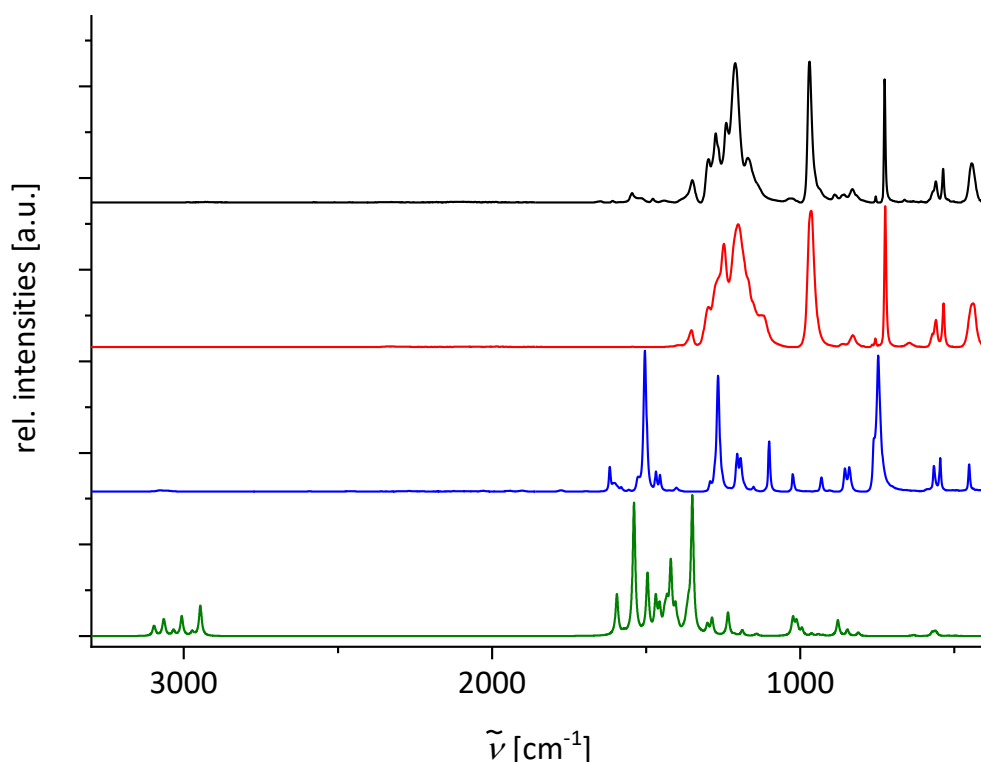

**Figure S 54:** Comparison of the experimental IR spectra of  $[\{\text{Ga}(\text{NacNac}^{\text{Mes}})\}_2][\text{pf}]_2 \cdot 1.5\text{oDFB}$  (black),  $\text{NO}[\text{pf}]$  (red) and  $\text{oDFB}$  (blue) with the calculated IR spectra (RI-BP86(D3BJ)/def2-TZVPP) of  $[\{\text{Ga}(\text{NacNac}^{\text{Mes}})\}_2]^{2+}$  (green).

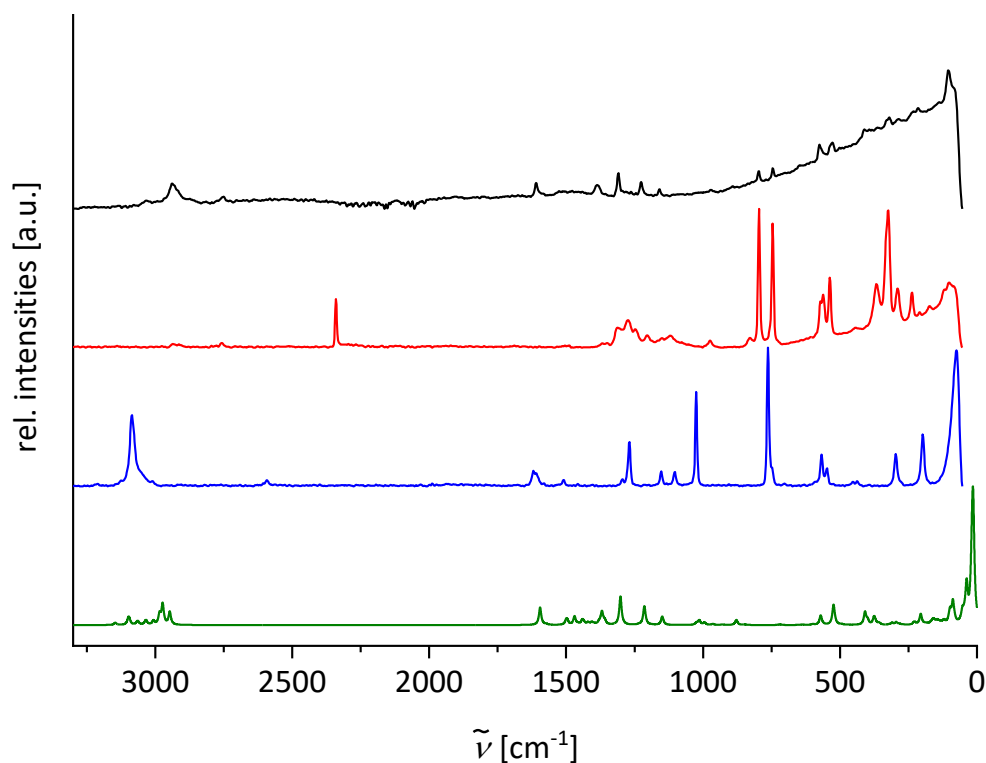

**Figure S 55:** Comparison of the experimental Raman spectra of  $[1][pf]_2 \cdot 1.5oDFB$  (black),  $NO[pf]$  (red) and  $oDFB$  (blue) with the calculated IR spectra (RI-BP86(D3BJ)/def2-TZVPP) of  $1^{2+}$  (green).

**Table S 12:** IR and Raman bands with the assignment of the respective vibration modes in  $[1][pf]_2 \cdot 1.5oDFB$ .

| $[1][pf]_2 \cdot 1.5oDFB$ |          | Assignment                                      |
|---------------------------|----------|-------------------------------------------------|
| IR                        | Raman    |                                                 |
| -                         | 104 (vs) | C-C ( $[pf]^-$ ) <sup>a</sup>                   |
| -                         | 138 (s)  | -                                               |
| -                         | 215 (s)  | C-C, Al-O, O-C ( $[pf]^-$ ) <sup>a</sup>        |
| -                         | 285 (s)  | C-C ( $[pf]^-$ ) <sup>b</sup>                   |
| -                         | 321 (s)  | C-C, Al-O ( $[pf]^-$ ) <sup>b</sup>             |
| -                         | 363 (m)  | Al-O, O-C ( $[pf]^-$ ) <sup>a</sup>             |
| 415 (vw)                  | 412 (m)  | Ga-Ga, Ga-N, C-C (mesityl, NacNac) <sup>a</sup> |
| 443 (w)                   | -        | O-C, Al-O, C-F ( $[pf]^-$ ) <sup>a</sup>        |
| 536 (w)                   | 528 (m)  | C-C, C-O ( $[pf]^-$ ) <sup>b</sup>              |
| 560 (vw)                  | -        | C-C, Al-O ( $[pf]^-$ ) <sup>b</sup>             |
| -                         | 575 (m)  | C-C, Al-O ( $[pf]^-$ ) <sup>b</sup>             |
| -                         | 646 (w)  | C-C, C-H (NacNac) <sup>a</sup>                  |
| 662 (vw)                  | -        | -                                               |
| 726 (vs)                  | -        | C-C, C-O ( $[pf]^-$ ) <sup>b</sup>              |
| -                         | 745 (w)  | C-H ( $oDFB$ ) <sup>a</sup>                     |
| 755 (vw)                  | -        | C-C, C-O ( $[pf]^-$ ) <sup>b</sup>              |
| -                         | 797 (w)  | Al-O, C-C, C-F ( $[pf]^-$ ) <sup>a</sup>        |
| 831 (vw)                  | -        | Al-O, C-C ( $[pf]^-$ ) <sup>b</sup>             |
| 857 (vw)                  | -        | C-H (mesityl) <sup>a</sup>                      |
| 889 (vw)                  | -        | C-H ( $oDFB$ ) <sup>a</sup>                     |

|           |           |                                                                                                           |
|-----------|-----------|-----------------------------------------------------------------------------------------------------------|
| 970 (vs)  | 970 (vw)  | C–C, C–F ([ <i>ρfj</i> <sup>-</sup> ) <sup>b</sup>                                                        |
| 1026 (vw) | -         | C–H, C–C ( <i>oDFB</i> ) <sup>a</sup> , C–C (mesityl, NacNac) <sup>a</sup>                                |
| 1034 (vw) | -         | C–C (mesityl, NacNac) <sup>a</sup>                                                                        |
| -         | 1159 (vw) | C–C, C–F ([ <i>ρfj</i> <sup>-</sup> ) <sup>a</sup>                                                        |
| 1171 (w)  | -         | C–C, C–F ([ <i>ρfj</i> <sup>-</sup> ) <sup>a</sup>                                                        |
| 1211 (vs) | -         | C–H, C–C (mesityl), <sup>a</sup> N–C, N–Ga, C–C, C–F ([ <i>ρfj</i> <sup>-</sup> ) <sup>b</sup>            |
| -         | 1226 (vw) | C–N, C–H (mesityl, NacNac) <sup>a</sup>                                                                   |
| 1240 (m)  | -         | C–H (mesityl), <sup>a</sup> C–C, C–F ([ <i>ρfj</i> <sup>-</sup> ) <sup>b</sup>                            |
| 1274 (m)  | -         | C–N, C–C (mesityl), <sup>a</sup> C–C, C–F ([ <i>ρfj</i> <sup>-</sup> ) <sup>b</sup>                       |
| 1298 (w)  | -         | C–H (NacNac), <sup>a</sup> C–C (mesityl), <sup>a</sup> C–C, C–F ([ <i>ρfj</i> <sup>-</sup> ) <sup>b</sup> |
| -         | 1309 (w)  | C–C (mesityl) <sup>a</sup>                                                                                |
| 1350 (vw) | -         | C–H, C–C, C–N (NacNac), <sup>a</sup> C–C, C–F ([ <i>ρfj</i> <sup>-</sup> ) <sup>b</sup>                   |
| 1442 (vw) | -         | C–H (mesityl CH <sub>3</sub> groups) <sup>a</sup>                                                         |
| 1478 (vw) | 1478 (vw) | C–H, C–C (mesityl) <sup>a</sup>                                                                           |
| 1517 (vw) | -         | C–H, C–C, C–F ( <i>oDFB</i> ) <sup>a</sup>                                                                |
| 1546 (vw) | -         | C–H, C–C (NacNac) <sup>a</sup>                                                                            |
| 1609 (vw) | 1610 (vw) | C–C (mesityl) <sup>a</sup>                                                                                |
| 1648 (vw) | -         | -                                                                                                         |
| -         | 1676 (vw) | -                                                                                                         |
| -         | 2124 (vw) | -                                                                                                         |
| -         | 2750 (vw) | -                                                                                                         |
| 2931 (vw) | 2939 (vw) | C–H (mesityl CH <sub>3</sub> groups) <sup>a</sup>                                                         |
| -         | 3034 (vw) | C–H (mesityl CH <sub>3</sub> groups) <sup>a</sup>                                                         |
| 3408 (vw) | -         | -                                                                                                         |
| 3615 (vw) | -         | -                                                                                                         |

a) Calculated at RI-BP86(D3BJ)/def2-TZVPP level of theory in the gas phase (section 8.14). b) Assignments based on literature values.<sup>[52–54]</sup>

## 6.2 $[\{\text{Ga}(\text{CDP}^{\text{Ph}})\}_2][\text{pf}]_2$ ( $[\mathbf{2}][\text{pf}]_2$ )

**IR (Diamond-ATR):**  $\tilde{\nu}$  [ $\text{cm}^{-1}$ ] = 3070 (vw), 2975 (vw), 1589 (vw), 1483 (vw), 1438 (vw), 1351 (vw), 1297 (w), 1274 (m), 1238 (m), 1211 (vs), 1167 (w), 1102 (w), 1069 (vw), 1026 (vw), 997 (vw), 969 (vs), 832 (vw), 778 (w), 754 (vw), 739 (w), 726 (vs), 691 (m), 678 (w), 618 (vw), 571 (vw), 559 (vw), 536 (vw), 526 (m), 500 (m), 442 (w), 386 (vw). **FT-Raman:**  $\tilde{\nu}$  [ $\text{cm}^{-1}$ ] = 3064 (w), 2938 (vw), 1589 (w), 1575 (vw), 1297 (vw), 1188 (vw), 1164 (vw), 1101 (vw), 1030 (w), 1001 (m), 842 (vw), 797 (vw), 746 (vw), 618 (vw), 574 (vw), 322 (vw), 234 (vw), 200 (vw), 173 (vw), 154 (vw), 81 (vs).

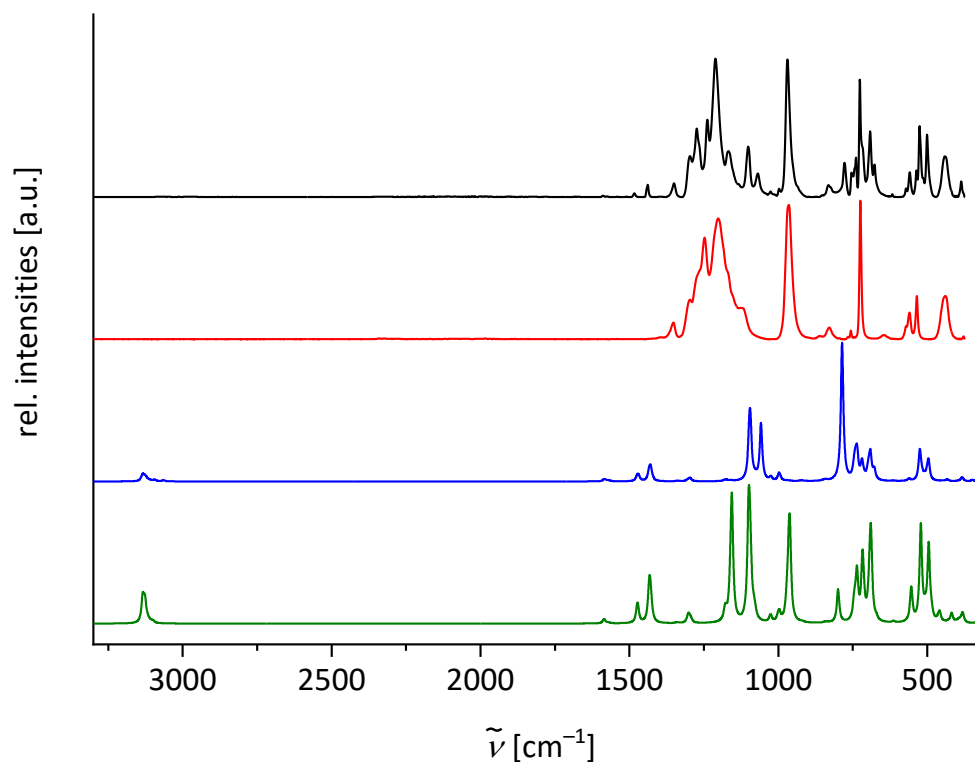

**Figure S 56:** Comparison of the experimental IR spectra of putative  $[\mathbf{2}][\text{pf}]_2$  (black) and  $\text{NO}[\text{pf}]$  (red) with the calculated IR spectra (RI-BP86(D3BJ)/def2-TZVPP) of  $\mathbf{2}^{2+}$  (blue) and  $[\text{H}(\text{CDP}^{\text{Ph}})]^+$  (green).

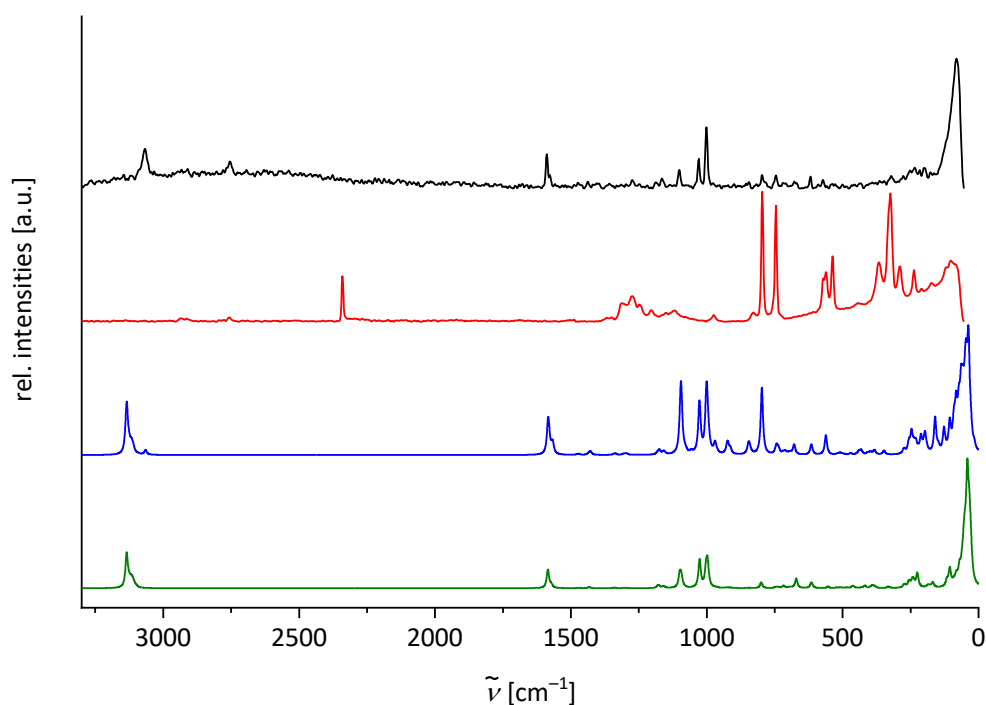

**Figure S 57:** Comparison of the experimental Raman spectra of putative  $[2][pf]_2$  (black) and  $NO[pf]$  (red) with the calculated IR spectra (RI-BP86(D3BJ)/def2-TZVPP) of  $2^{2+}$  (blue) and  $[H(CDP^{Ph})]^+$  (green).

**Table S 13:** IR and Raman bands with the assignment of the respective vibration modes in  $[2][pf]_2$ .

| $[2][pf]_2$ |          | Assignment                          |
|-------------|----------|-------------------------------------|
| IR          | Raman    |                                     |
| -           | 81 (vs)  | C-C ( $[pf]^-$ ) <sup>a</sup>       |
| -           | 154 (vw) | Ga-Ga, P-C (CDP) <sup>a</sup>       |
| -           | 173 (vw) | -                                   |
| -           | 200 (vw) | P-C, C-C (CDP) <sup>a</sup>         |
| -           | 234 (vw) | P-C, C-C (CDP) <sup>a</sup>         |
| -           | 322 (vw) | C-C, Al-O ( $[pf]^-$ ) <sup>b</sup> |
| 386 (vw)    | -        | C-O ( $[pf]^-$ ) <sup>a</sup>       |
| 442 (w)     | -        | C-O, Al-O ( $[pf]^-$ ) <sup>a</sup> |
| 500 (m)     | -        | P-C, C-C, C-H (CDP) <sup>a</sup>    |
| 526 (m)     | -        | P-C, C-C, C-H (CDP) <sup>a</sup>    |
| 536 (vw)    | -        | C-C, C-O ( $[pf]^-$ ) <sup>b</sup>  |
| 559 (vw)    | -        | C-C, Al-O ( $[pf]^-$ ) <sup>b</sup> |
| 571 (vw)    | 574 (vw) | C-C, Al-O ( $[pf]^-$ ) <sup>b</sup> |
| 618 (vw)    | 618 (vw) | C-C (CDP) <sup>a</sup>              |
| 678 (w)     | -        | C-Ga, C-C, C-P (CDP) <sup>a</sup>   |
| 691 (m)     | -        | C-C, C-H (CDP) <sup>a</sup>         |
| 726 (vs)    | -        | C-C, C-O ( $[pf]^-$ ) <sup>b</sup>  |
| 739 (w)     | -        | C-H (CDP) <sup>a</sup>              |
| -           | 746 (vw) | C-H (CDP) <sup>a</sup>              |
| 754 (vw)    | -        | C-C, C-O ( $[pf]^-$ ) <sup>b</sup>  |
| 778 (w)     | -        | -                                   |
| -           | 797 (vw) | C-Ga, C-C, C-P (CDP) <sup>a</sup>   |
| 832 (vw)    | -        | C-C, Al-O ( $[pf]^-$ ) <sup>b</sup> |



|           |           |                                      |
|-----------|-----------|--------------------------------------|
| -         | 842 (vw)  | C-H (CDP) <sup>a</sup>               |
| 969 (vs)  | -         | C-C, C-F ([ $\rho f$ ]) <sup>b</sup> |
| 997 (vw)  | 1001 (m)  | C-C, C-H (CDP) <sup>a</sup>          |
| 1026 (vw) | 1030 (w)  | C-C, C-H (CDP) <sup>a</sup>          |
| 1069 (vw) | -         | C-C, C-H (CDP) <sup>a</sup>          |
| 1102 (w)  | 1101 (vw) | C-C, C-H, C-P (CDP) <sup>a</sup>     |
| 1167 (w)  | 1164 (vw) | C-H (CDP) <sup>a</sup>               |
| -         | 1188 (vw) | C-H (CDP) <sup>a</sup>               |
| 1211 (vs) | -         | C-C, C-F ([ $\rho f$ ]) <sup>b</sup> |
| 1238 (m)  | -         | C-C, C-F ([ $\rho f$ ]) <sup>b</sup> |
| 1274 (m)  | -         | C-C, C-F ([ $\rho f$ ]) <sup>b</sup> |
| 1297 (w)  | 1297 (vw) | C-C, C-F ([ $\rho f$ ]) <sup>b</sup> |
| 1351 (vw) | -         | C-C, C-F ([ $\rho f$ ]) <sup>b</sup> |
| 1438 (vw) | -         | C-C, C-H (CDP) <sup>a</sup>          |
| 1483 (vw) | -         | C-C, C-H (CDP) <sup>a</sup>          |
| -         | 1575 (vw) | C-C, C-H (CDP) <sup>a</sup>          |
| 1589 (vw) | 1589 (w)  | C-C, C-H (CDP) <sup>a</sup>          |
| -         | 2938 (vw) | -                                    |
| 2975 (vw) | -         | -                                    |
| 3070 (vw) | 3064 (w)  | C-H (CDP) <sup>a</sup>               |

a) Calculated at RI-BP86(D3BJ)/def2-TZVPP level of theory in the gas phase (section 8.14). b) Assignments based on literature values.<sup>[52-54]</sup>

### 6.3 $[\text{In}(\text{CDP}^{\text{Ph}})][\text{pf}]$

**FT-Raman:**  $\tilde{\nu}$  [ $\text{cm}^{-1}$ ] = 3596 (vw), 3538 (vw), 3063 (w), 3046 (vw), 1590 (w), 1576 (vw), 1488 (vw), 1327 (vw), 1309 (vw), 1103 (vw), 1031 (w), 1002 (m), 796 (vw), 767 (vw), 745 (vw), 664 (vw), 618 (vw), 565 (vw), 530 (vw), 320 (vw), 252 (vw), 231 (vw), 204 (vw), 189 (vw), 80 (vs).

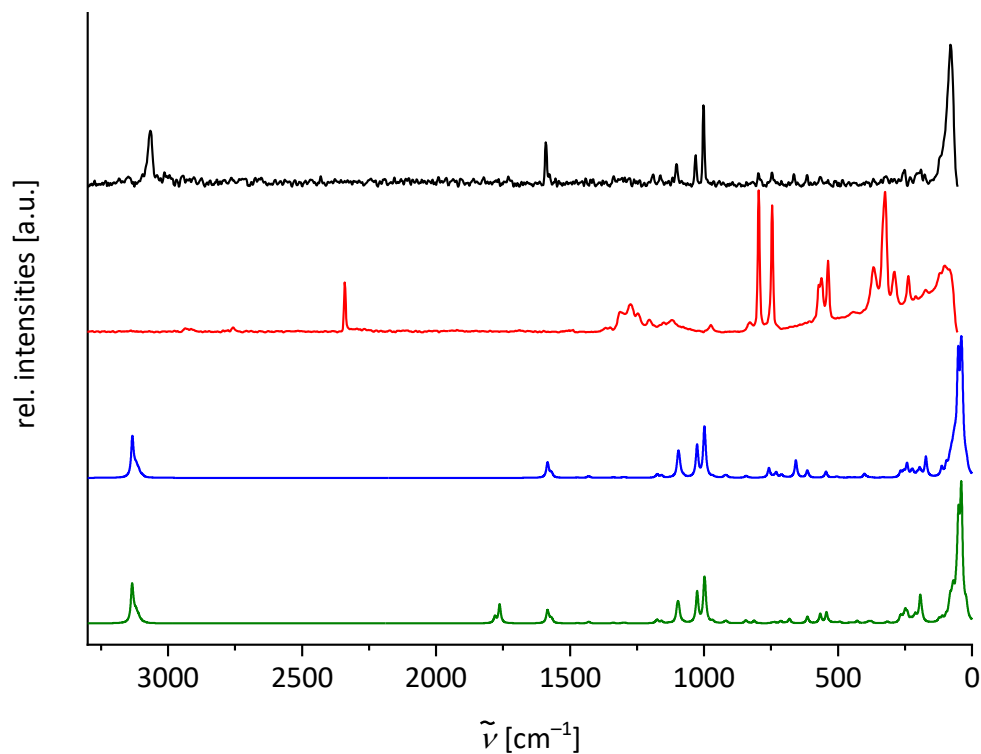

**Figure S 58:** Comparison of the experimental Raman spectrum of  $[\text{In}(\text{CDP}^{\text{Ph}})][\text{pf}]$  (black), and  $\text{NO}[\text{pf}]$  (red) and calculated Raman spectra (RI-BP86(D3BJ)/def2-TZVPP) of  $[\text{In}(\text{CDP}^{\text{Ph}})]^+$  (blue) and  $[\text{H}_2\text{In}(\text{CDP}^{\text{Ph}})]^+$  (green).

**Table S 14:** Raman bands with the assignment of the respective vibration modes in  $[\text{In}(\text{CDP}^{\text{Ph}})]_2[\text{pf}]$ .

| $[\text{In}(\text{CDP}^{\text{Ph}})]_2[\text{pf}]_2$<br>Raman | Assignment                                           |
|---------------------------------------------------------------|------------------------------------------------------|
| 80 (vs)                                                       | C–C (CDP and $[\text{pf}]^-$ ) <sup>a</sup>          |
| 189 (vw)                                                      | P–C (CDP) <sup>a</sup>                               |
| 204 (vw)                                                      | P–C, C–C (CDP) <sup>a</sup>                          |
| 231 (vw)                                                      | P–C, C–C (CDP) <sup>a</sup>                          |
| 252 (vw)                                                      | P–C, C–C (CDP) <sup>a</sup>                          |
| 320 (vw)                                                      | C–C, Al–O ( $[\text{pf}]^-$ ) <sup>b</sup>           |
| 530 (vw)                                                      | P–C, C–C, C–H (CDP) <sup>a</sup>                     |
| 565 (vw)                                                      | C–C, Al–O ( $[\text{pf}]^-$ ) <sup>b</sup>           |
| 618 (vw)                                                      | C–C (CDP) <sup>a</sup>                               |
| 664 (vw)                                                      | -                                                    |
| 745 (vw)                                                      | C–C (CDP) <sup>a</sup>                               |
| 767 (vw)                                                      | C–C, C–F, Al–O, C–O ( $[\text{pf}]^-$ ) <sup>a</sup> |
| 796 (vw)                                                      | C–C, C–P (CDP) <sup>a</sup>                          |
| 1002 (m)                                                      | C–C, C–H (CDP) <sup>a</sup>                          |
| 1031 (w)                                                      | C–C, C–H (CDP) <sup>a</sup>                          |
| 1103 (vw)                                                     | C–C, C–H, C–P (CDP) <sup>a</sup>                     |
| 1309 (vw)                                                     | C–C, C–H, C–P (CDP) <sup>a</sup>                     |
| 1327 (vw)                                                     | C–C, Al–O, C–O ( $[\text{pf}]^-$ ) <sup>a</sup>      |
| 1488 (vw)                                                     | C–C, C–H (CDP) <sup>a</sup>                          |
| 1576 (vw)                                                     | C–C, C–H (CDP) <sup>a</sup>                          |
| 1590 (w)                                                      | C–C, C–H (CDP) <sup>a</sup>                          |
| 3046 (vw)                                                     | -                                                    |
| 3063 (w)                                                      | C–H (CDP) <sup>a</sup>                               |

a) Calculated at RI-BP86(D3BJ)/def2-TZVPP level of theory in the gas phase (section 8.14). b) Assignments based on literature values.<sup>[52–54]</sup>

## 7 Mass Spectrometry

In order to investigate Coulomb explosion of  $[\{\text{Ga}(\text{NacNac}^{\text{Mes}})\}_2]^{2+}$  ( $\mathbf{1}^{2+}$ ) and  $[\{\text{Ga}(\text{CDP}^{\text{Ph}})\}_2]^{2+}$  ( $\mathbf{2}^{2+}$ ) in the gas phase, crystals of  $[\mathbf{1}][\text{pf}]_2 \cdot 1.5\text{oDFB}$  and  $[\mathbf{2}][\text{pf}]_2$  were dissolved in *o*DFB and analyzed by mass spectrometry (MS). Unfortunately, in both cases, the signal of the protonated ligands, *i.e.*  $[\text{H}_2\text{NacNac}^{\text{Mes}}]^+$  and  $[\text{H}-\text{CDP}^{\text{Ph}}]^+$  is by far the most intensive signal, and no significant amounts of the dimeric or monomeric Ga complexes are observed ( $m/z = 402$  and  $605$  for  $\mathbf{1}^{2+}$  and  $\mathbf{2}^{2+}$ , respectively). This also the case when cooling the *o*DFB solution to  $-30$  °C or when spraying from a  $\text{CH}_2\text{Cl}_2$  solution which is cooled to  $-78$  °C. Obviously,  $\mathbf{1}^{2+}$  and  $\mathbf{2}^{2+}$  cannot be analyzed by ESI without protonation of the carbodiphosphorane and  $\beta$ -diketiminato ligands, due to their high basicity.

In **Figure S 59** and **Figure S 60**, the full ESI mass spectra (cation mode) and the isotope patterns of the most intensive signals when spraying from a *o*DFB solution ( $-30$  °C) and a  $\text{CH}_2\text{Cl}_2$  solution ( $-78$  °C) are shown. The depicted spectra were recorded using the normal scan mode. To confirm the identity of selected ions, the relative signal intensities of the experimental patterns were compared with calculated isotope patterns (black bars).

In the ESI mass spectra of the digallene solutions,  $[\text{Ph}_3\text{P}=\text{CH}(\text{POH})\text{Ph}_2]^+$  the protonated form of  $[\text{Ph}_3\text{P}=\text{CH}(\text{PO})\text{Ph}_2]$ , is detected (**Figure S 60**), which can be attributed to the presence of water during the spraying process. The latter is generated by hydrolysis of  $\text{CDP}^{\text{Ph}}$ .<sup>[28]</sup> The ESI mass spectra showed more signals at higher  $m/z$  values for solutions of  $[\mathbf{1}][\text{pf}]_2 \cdot 1.5\text{oDFB}$  than for solutions of  $[\mathbf{2}][\text{pf}]_2$ . This may indicate that dinuclear species are only present in the gas phase for the digallane and not for the digallene, again underlining that the Ga–Ga single bond is stronger than the Ga $\rightleftharpoons$ Ga double bond. However, care must be taken since no reasonable elemental composition could be found for these signals.

## 7.1 $[\{\text{Ga}(\text{NacNac}^{\text{Mes}})_2\}][\text{pf}]_2 \cdot 1.5\text{oDFB}$ ( $[1][\text{pf}]_2 \cdot 1.5\text{oDFB}$ )

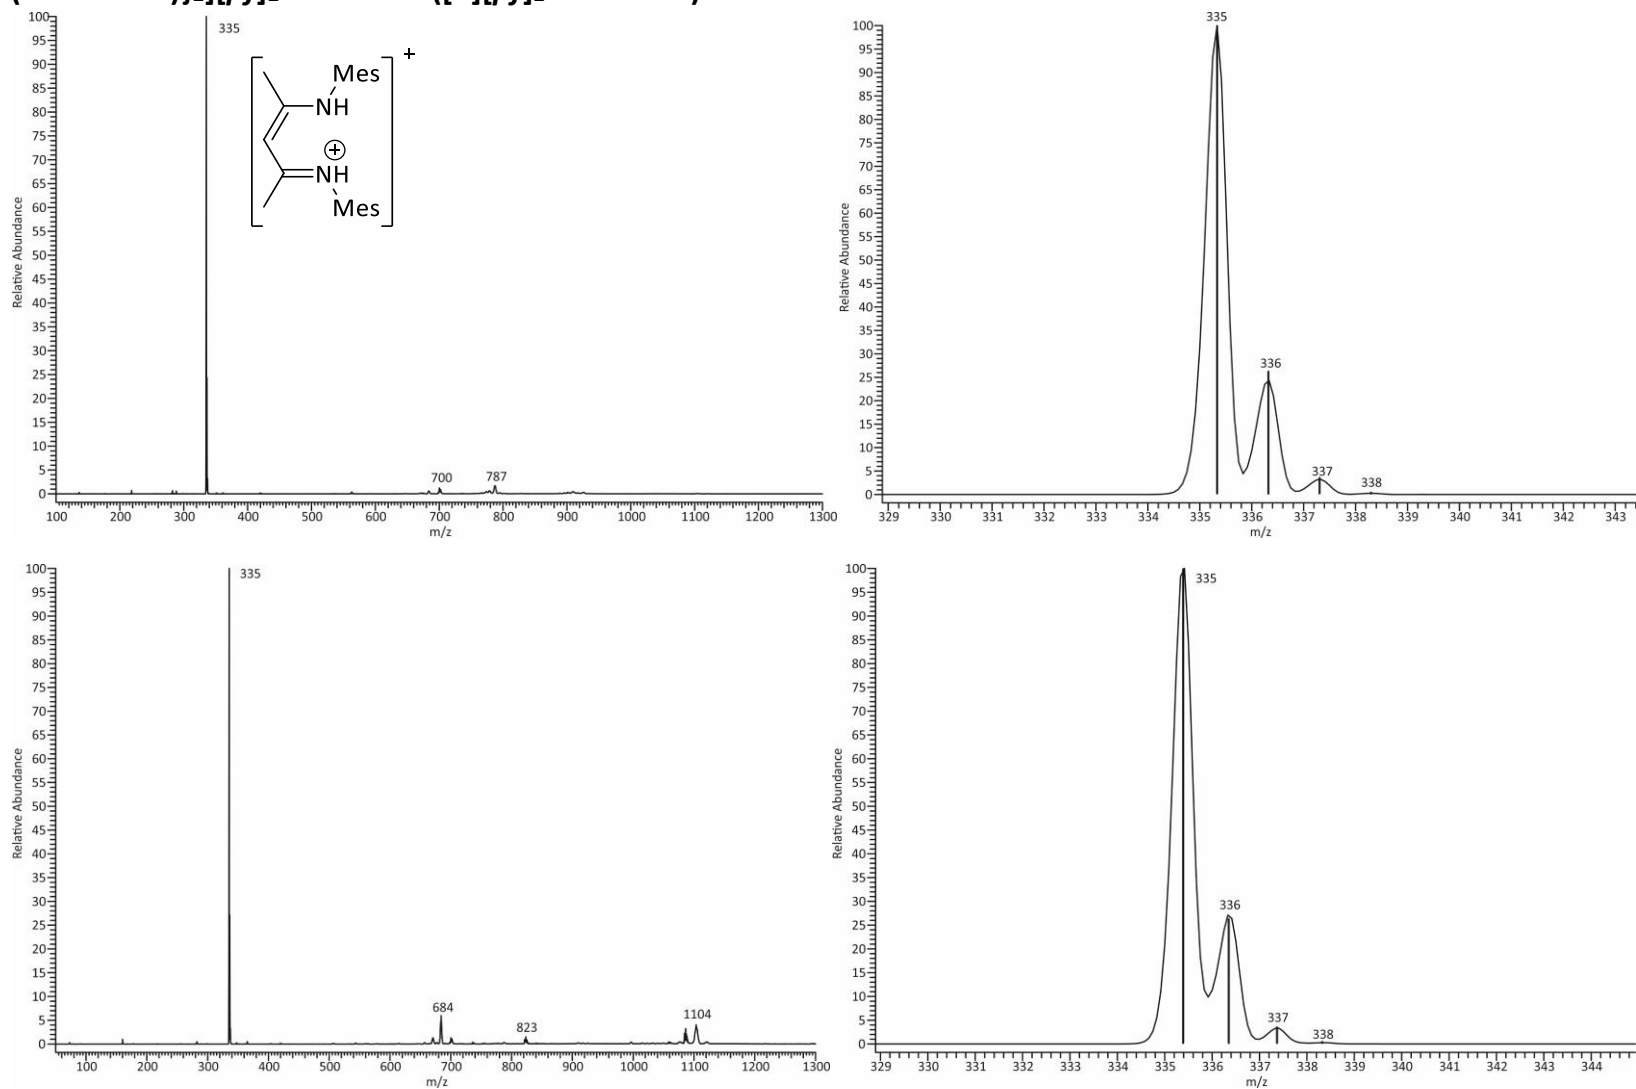

**Figure S 59:** ESI mass spectra (cation mode) of crystals of  $[1][\text{pf}]_2 \cdot 1.5\text{oDFB}$  dissolved in  $\text{oDFB}$  at  $-30\text{ }^\circ\text{C}$  (top left) and in  $\text{CH}_2\text{Cl}_2$  at  $-78\text{ }^\circ\text{C}$  (bottom left). The signal pattern of the most intensive signal is also shown (top right and bottom right, respectively).

## 7.2 $[\{\text{Ga}(\text{CDP}^{\text{Ph}})\}_2][\text{pf}]_2$ ( $[\mathbf{2}][\text{pf}]_2$ )

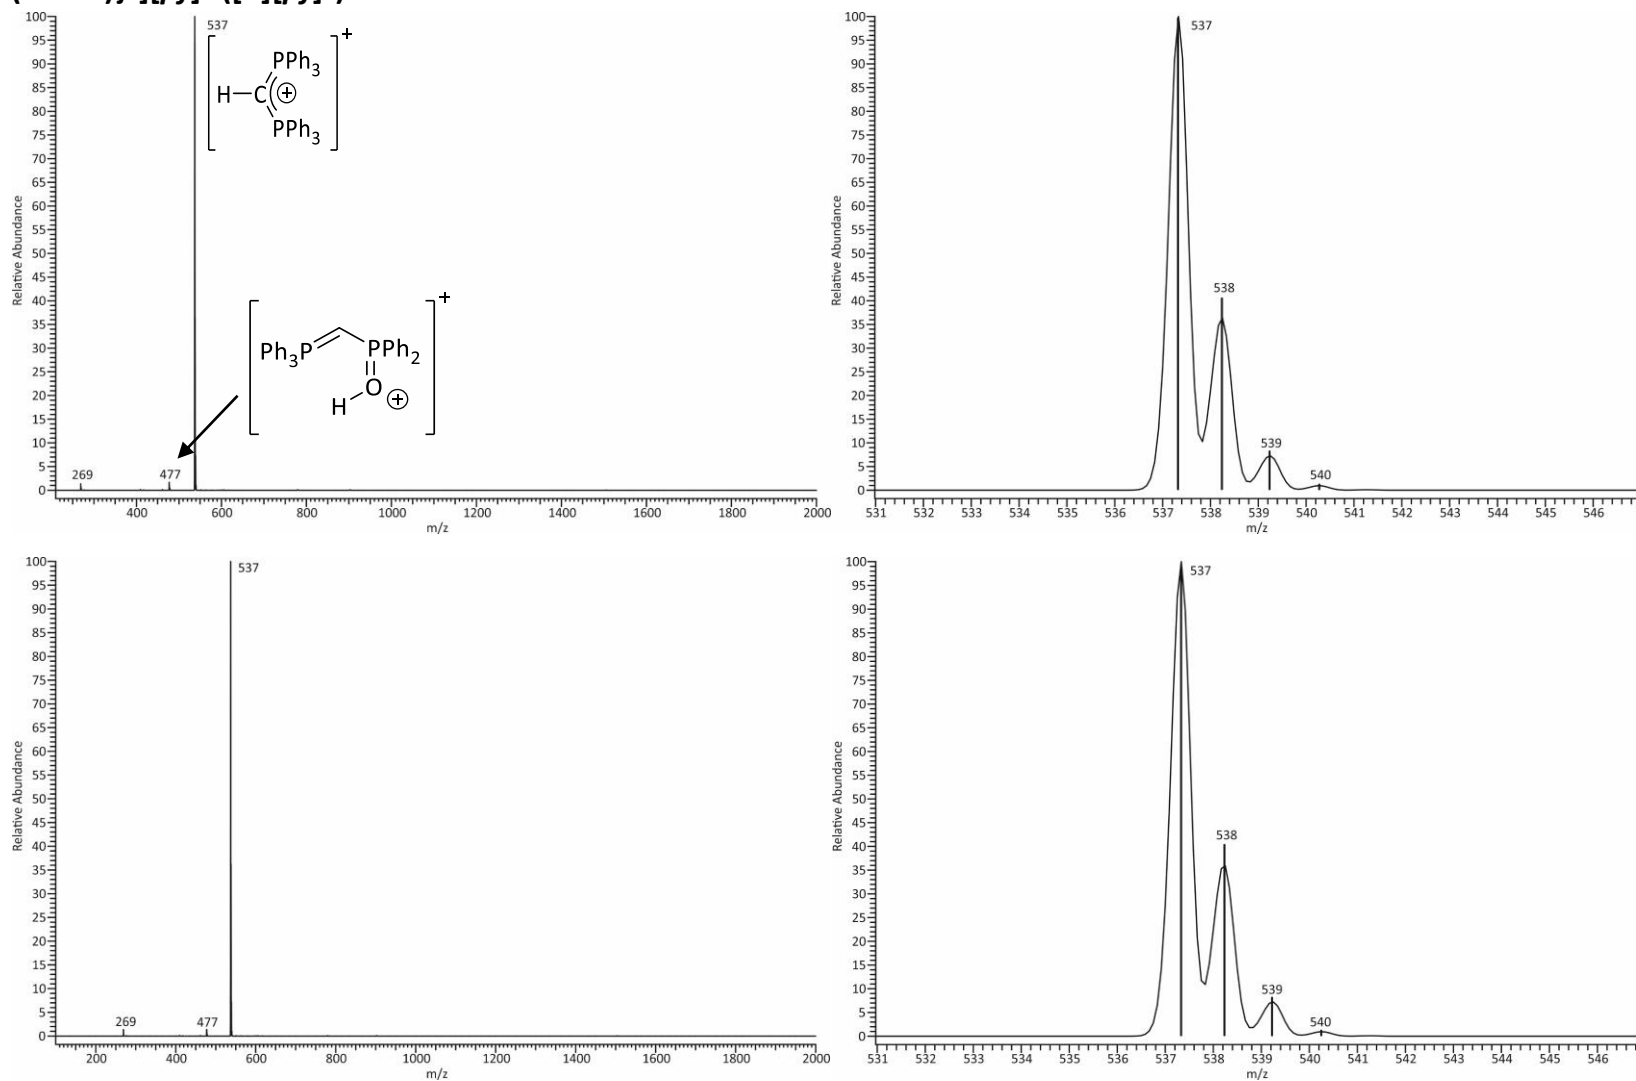

**Figure S 60:** ESI mass spectra (cation mode) of crystals of  $[\mathbf{2}][\text{pf}]_2$  dissolved in *o*DFB at  $-30^\circ\text{C}$  (top) and in  $\text{CH}_2\text{Cl}_2$  at  $-78^\circ\text{C}$  (bottom). The signal pattern of the most intensive signal is also shown (top right and bottom right, respectively).

## 8 Quantum Chemical Calculations

### 8.1 Dissociation of $[\{\text{Ga}(\text{NacNac}^{\text{Mes}})\}_2]^{2+}$ ( $1^{2+}$ ) and $[\{\text{Ga}(\text{CDP}^{\text{Ph}})\}_2]^{2+}$ ( $2^{2+}$ )

Quantum chemical calculations (RI-BP86(D3BJ)/def2-TZVPP) suggest that the dissociation of  $1^{2+}$  into  $[\text{Ga}(\text{NacNac}^{\text{Mes}})]^+$  is both endergonic in the gas phase and in an *o*DFB solution, as delineated in **Figure S 61** ( $\epsilon = 13.38$  D).<sup>[26]</sup>

Conversely, the twice positively charged  $2^{2+}$  dimer is predicted to dissociate into the monomers in the gas phase. In this dimer, the weaker Ga $\leftrightarrow$ Ga bond does not allow to overcome Coulomb explosion. However, in an *o*DFB solution, dimerization of  $[\text{Ga}(\text{CDP}^{\text{Ph}})]^+$  to  $2^{2+}$  is favored by  $39 \text{ kJ mol}^{-1}$  (RI-BP86(D3BJ)/def2-TZVPP). Since  $^{31}\text{P}$  DOSY NMR experiments are inconclusive (section 5.9), it cannot unambiguously be stated whether  $2^{2+}$  dissociates into monomeric  $[\text{Ga}(\text{CDP}^{\text{Ph}})]^+$  in solution.

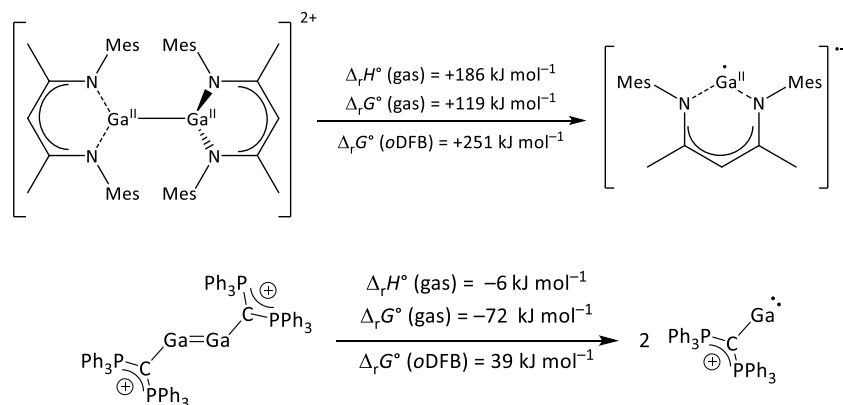

**Figure S 61:** Dissociation of  $1^{2+}$  (top) and  $2^{2+}$  (bottom) and calculated thermodynamics both in the gas phase and in *o*DFB, respectively.

## 8.2 Molecular orbitals of $1^{2+}$ and $2^{2+}$

In **Figure S 62**, the shape of the Kohn-Sham frontier orbitals of  $1^{2+}$  and  $2^{2+}$  are shown, along with their energy levels.

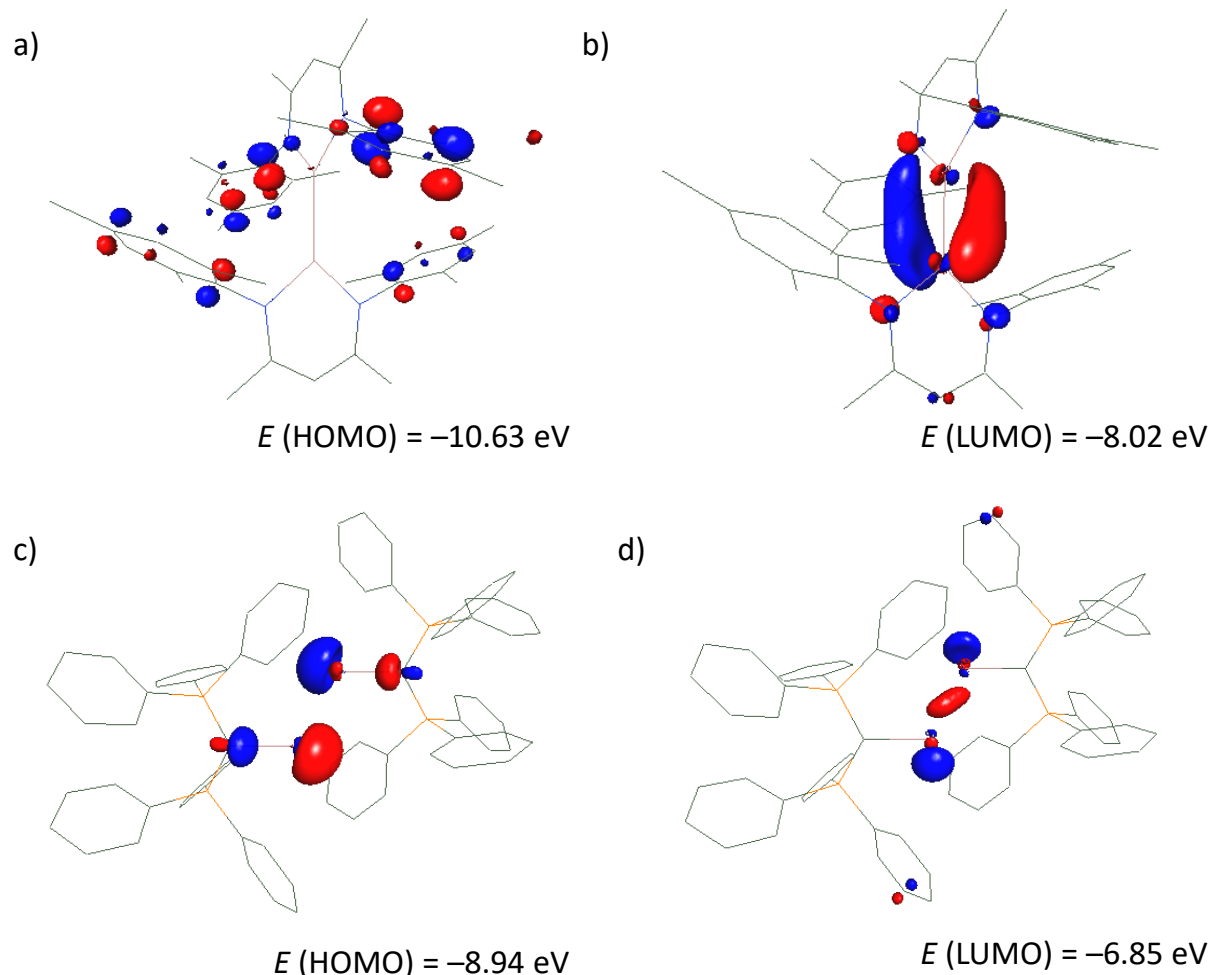

**Figure S 62:** Kohn-Sham frontier orbitals of  $1^{2+}$  (a) HOMO and b) LUMO) and  $2^{2+}$  (c) HOMO and d) LUMO) as well as their energies (RI-BP86(D3BJ)/def2-TZVPP, *iso* value = 0.065).

The HOMO-LUMO gap is considerably smaller in the dicationic digallene (2.1 eV) than in the dicationic digallane (2.6 eV). This is in good agreement with the reduced stability and increased reactivity of  $2^{2+}$  in solution compared to  $1^{2+}$ . Interestingly, the LUMO of both compounds is a GaGa bonding orbital. While it has  $\sigma$  character for  $2^{2+}$ , it is a twisted  $\pi$  bond for  $1^{2+}$ . The fact that the 10 highest occupied orbitals have no significant Ga–Ga bonding character implies that this bonding interaction is comparatively stable.



## 8.3 EDA-NOCV Analysis

### 8.3.1 The Ga–Ga Bond in $[\{\text{Ga}(\text{CDP}^{\text{Ph}})\}_2]^{2+}$ ( $2^{2+}$ )

The bonding situation in  $[\{\text{Ga}(\text{CDP}^{\text{Ph}})\}_2]^{2+}$  ( $2^{2+}$ ) was analyzed with the EDA-NOCV method.<sup>[55]</sup> Three different orbital fragmentation modes were investigated, as shown in **Scheme S 5**.

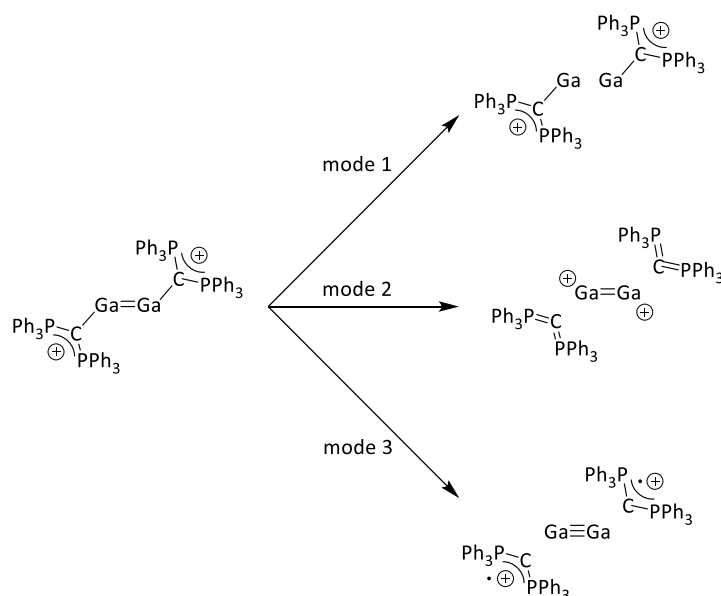

**Scheme S 5:** Three different orbital fragmentation modes investigated by EDA-NOCV.

An EDA-NOCV analysis was performed for the three different orbital fragmentation modes and for the structure found in the solid state (with optimized position of the hydrogen atoms) as well as for the gas phase-optimized structure, respectively. The orbital interactions for the  $\Delta E_{\text{orb}}$  are summarized in **Table S 15**.

**Table S 15:** Calculated orbital interactions  $\Delta E_{\text{orb}}$  for the three orbital fragmentation modes depicted in **Scheme S 5**. The interaction energies were calculated for both the gas phase-optimized structure as well as for the structure found in the solid state (values in parentheses; with optimized position of the hydrogen atoms). Energy values are given in  $\text{kcal mol}^{-1}$ .

|                                    | Fragmentation Mode 1 | Fragmentation Mode 2 | Fragmentation Mode 3 |
|------------------------------------|----------------------|----------------------|----------------------|
| $\Delta E_{\text{orb}}^{\text{a}}$ | -29.9 (-40.4)        | -313.2 (-338.3)      | -301.8 (-307.2)      |

a) Values in parentheses refer to the structure found in the solid state.

The EDA-NOCV analysis clearly suggests that the Ga–Ga bond is significantly weaker than the C–Ga bond. In **Table S 16**, the EDA-NOCV results for the weak Ga–Ga interaction are presented.

**Table S 16:** EDA-NOCV results for the  $2^{2+}$  complex using two  $[(\text{CDP}^{\text{Ph}})\text{Ga}]^+$  interacting fragments at the RI-BP86(D3BJ)/def2-TZVPP level. Energy values are given in  $\text{kcal mol}^{-1}$ . Both the scXRD structure and the gas phase-optimized structure were analyzed.

| Energies                                        | Orbital Interaction                                                                                                                                                                                                                              | $[(\text{CDP}^{\text{Ph}})\text{Ga}]^+ + [\text{Ga}(\text{CDP}^{\text{Ph}})]^+$ |                                   |
|-------------------------------------------------|--------------------------------------------------------------------------------------------------------------------------------------------------------------------------------------------------------------------------------------------------|---------------------------------------------------------------------------------|-----------------------------------|
|                                                 |                                                                                                                                                                                                                                                  | Solid State Structure                                                           | Gas Phase-Optimized Structure     |
| $\Delta E_{\text{int}}$                         |                                                                                                                                                                                                                                                  | 2.9                                                                             | -1.7                              |
| $\Delta E_{\text{Pauli}}$                       |                                                                                                                                                                                                                                                  | 82.5                                                                            | 60.2                              |
| $\Delta E_{\text{disp}}^{\text{a}}$             |                                                                                                                                                                                                                                                  | -29.8 (37.4 %)                                                                  | -36.1 (54.7 %)                    |
| $\Delta E_{\text{elstat}}^{\text{a}}$           |                                                                                                                                                                                                                                                  | -9.4 (11.8 %)                                                                   | 4.1                               |
| $\Delta E_{\text{orb}}^{\text{a}}$              |                                                                                                                                                                                                                                                  | -40.4 (50.8 %)                                                                  | -29.9 (45.3 %)                    |
| $\Delta E_{\text{orb}(1)}^{\text{b}}$           | $(\text{CDP}^{\text{Ph}})\text{Ga}^+$ (HOMO) $\rightarrow$ $\text{Ga}^+(\text{CDP}^{\text{Ph}})$ (LUMO)                                                                                                                                          | -16.0 (39.6 %)<br>$ \nu_1  = 0.50$                                              | -8.7 (29.1 %)<br>$ \nu_1  = 0.37$ |
| $\Delta E_{\text{orb}(2)}^{\text{b}}$           | $(\text{CDP}^{\text{Ph}})\text{Ga}^+$ (HOMO) $\rightarrow$ $\text{Ga}^+(\text{CDP}^{\text{Ph}})$ (LUMO)                                                                                                                                          | -15.0 (37.1 %)<br>$ \nu_2  = 0.43$                                              | -9.6 (32.1 %)<br>$ \nu_2  = 0.36$ |
| $\Delta E_{\text{orb}(3)}^{\text{b}}$           | $(\text{CDP}^{\text{Ph}})\text{Ga}^+$ (HOMO-1) $\rightarrow$ $\text{Ga}^+(\text{CDP}^{\text{Ph}})$ (HOMO) (solid state) or $(\text{CDP}^{\text{Ph}})\text{Ga}^+$ (HOMO) $\rightarrow$ $\text{Ga}^+(\text{CDP}^{\text{Ph}})$ (HOMO-1) (gas phase) | -1.3 (3.2 %)<br>$ \nu_3  = 0.11$                                                | -1.3 (4.3 %)<br>$ \nu_3  = 0.11$  |
| $\Delta E_{\text{orb}(\text{rest})}^{\text{b}}$ |                                                                                                                                                                                                                                                  | -9.4 (20.0 %)                                                                   | -10.3 (34.4 %)                    |

a) Values in parentheses show the contribution to the total attractive interaction. b) Values in parentheses show the contribution to the total orbital interaction  $\Delta E_{\text{orb}}$ . The eigenvalues  $|\nu_1|$ ,  $|\nu_2|$  and  $|\nu_3|$  give the size of the charge migration in e.

It follows from the breakdown of the attractive interactions between the two  $[\text{Ga}(\text{CDP}^{\text{Ph}})]^+$  fragments that the covalent orbital interaction  $\Delta E_{\text{orb}}$  and the dispersion interaction  $\Delta E_{\text{disp}}$  have similar strength and that the electrostatic interaction  $\Delta E_{\text{elstat}}$  is rather negligible. The largest contribution, providing ca. 60–75 %, to the orbital term, comes from the donation of s-orbital electron density from one Ga atom into the p-orbital of the second Ga atom, which is the typical interaction between heavy elements involved in a non-classical double bond.

The individual orbital interactions are visualized by the associated deformation densities  $\Delta\rho$ , which are displayed in **Figure S 63** along with the most important fragment orbitals.

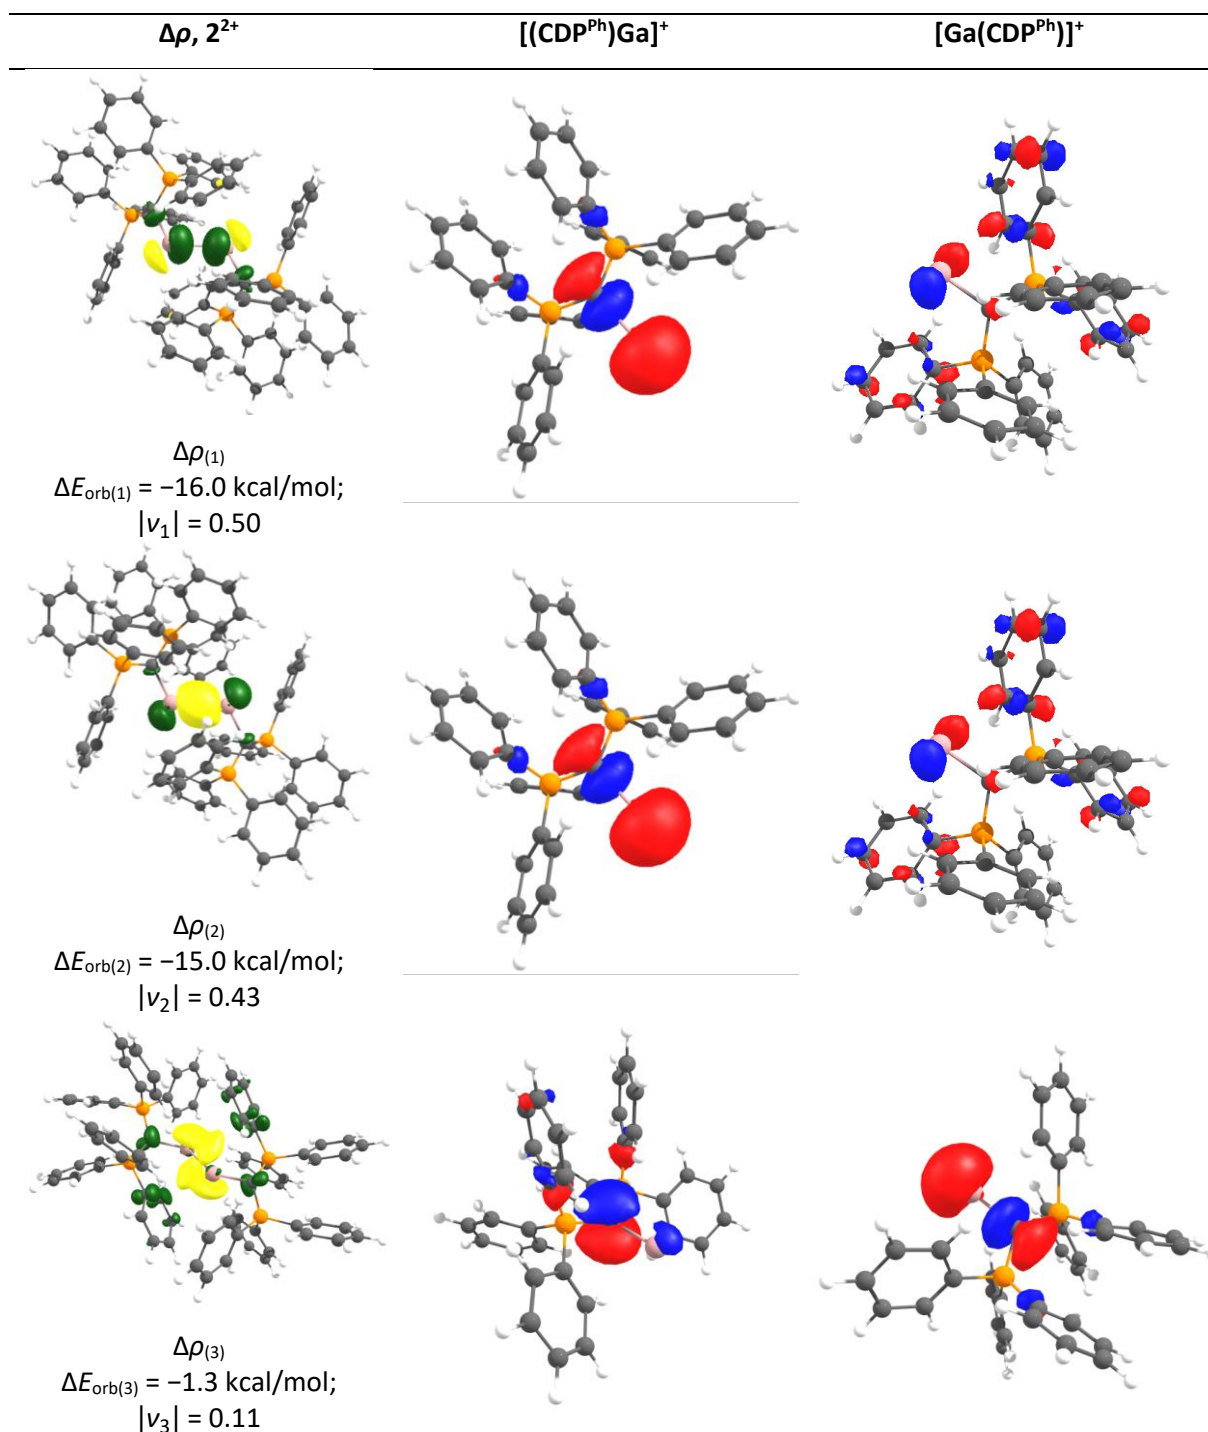

**Figure S 63:** Shape of the deformation densities  $\Delta\rho_{(1)-(3)}$ , corresponding to  $\Delta E_{\text{orb}(1)-(3)}$ , and the fragment orbitals of the two  $[(\text{CDP}^{\text{Ph}})\text{Ga}]^+$  moieties at the RI-BP86(D3BJ)/def2-TZVPP level (Isosurface values: 0.002 au for  $\Delta\rho_{(1)-(3)}$  (for  $\Delta\rho_{(3)}$ : 0.0002 au) and 0.05 au for the molecular orbitals). The results for the solid-state structure is shown; note that for the gas phase-optimized structure, the first two deformation densities are virtually identical to the ones shown here, while the shape of  $\Delta\rho_{(3)}$  deviates slightly. In the solid-state structure, the HOMO-1 of one  $[\text{Ga}(\text{CDP}^{\text{Ph}})]^+$  fragment donates electron density in the HOMO of the other  $[\text{Ga}(\text{CDP}^{\text{Ph}})]^+$  fragment, while it is the other way around in the gas phase-optimized structure. The eigenvalues  $|v_1|$ ,  $|v_2|$  and  $|v_3|$  give the size of the charge migration in e. The direction of the charge flow of the deformation densities is green  $\rightarrow$  yellow.

### 8.3.2 The C–Ga Bond in [Ga(CDP<sup>Ph</sup>)]<sup>+</sup>

In **Table S 17**, the results for the EDA-NOCV analysis of the CDP<sup>Ph</sup>/Ga analysis are presented. Obviously, the Ga–CDP<sup>Ph</sup> bond is likewise stabilized by electrostatic interactions and orbital interactions while dispersion interactions are significantly less important. Interestingly, both the  $\sigma$  (orbital interaction 1) and the  $\pi$  electron pair (orbital interaction 2) at C<sup>CDP</sup> bind to Ga<sup>+</sup>. Comparison of  $\Delta E_{\text{orb}(1)}$  and  $\Delta E_{\text{orb}(2)}$  reveals that the  $\sigma$  bond is stronger due to better orbital overlap. However, the orbital interaction energy and especially the charge migration associated with the  $\pi$  interaction is still significant.

**Table S 17:** EDA-NOCV results for the monomeric [Ga(CDP<sup>Ph</sup>)]<sup>+</sup> complex using CDP<sup>Ph</sup> and Ga<sup>+</sup> as interacting fragments at the RI-BP86(D3BJ)/def2-TZVPP level. Energy values are given in kcal mol<sup>-1</sup>. The gas phase-optimized structure of [Ga(CDP<sup>Ph</sup>)]<sup>+</sup> was analyzed.

| Energies                                        | Orbital Interaction                                                                           | CDP <sup>Ph</sup> + Ga <sup>+</sup> |
|-------------------------------------------------|-----------------------------------------------------------------------------------------------|-------------------------------------|
| $\Delta E_{\text{int}}$                         |                                                                                               | -110.1                              |
| $\Delta E_{\text{Pauli}}$                       |                                                                                               | 131.3                               |
| $\Delta E_{\text{disp}}^{\text{a}}$             |                                                                                               | -15.3 (6.3 %)                       |
| $\Delta E_{\text{elstat}}^{\text{a}}$           |                                                                                               | -112.1 (46.5 %)                     |
| $\Delta E_{\text{orb}}^{\text{a}}$              |                                                                                               | -113.8 (47.2 %)                     |
| $\Delta E_{\text{orb}(1)}^{\text{b}}$           | CDP <sup>Ph</sup> (HOMO–1) → Ga <sup>+</sup> ( <i>p</i> ) $\sigma$ donation                   | -61.7 (54.2 %)<br>$ v_1  = 0.76$    |
| $\Delta E_{\text{orb}(2)}^{\text{b}}$           | CDP <sup>Ph</sup> (HOMO) → Ga <sup>+</sup> ( <i>p</i> ) $\pi$ donation                        | -17.6 (15.5 %)<br>$ v_2  = 0.43$    |
| $\Delta E_{\text{orb}(3)}^{\text{b}}$           | CDP <sup>Ph</sup> (HOMO–6) → Ga <sup>+</sup> ( <i>p</i> ) $\sigma$ donation                   | -8.6 (7.6 %)<br>$ v_3  = 0.25$      |
| $\Delta E_{\text{orb}(4)}^{\text{b}}$           | (CDP <sup>Ph</sup> )Ga <sup>+</sup> (HOMO–1) → Ga <sup>+</sup> ( <i>s</i> ) $\sigma$ donation | -6.9 (6.1 %)<br>$ v_4  = 0.24$      |
| $\Delta E_{\text{orb}(\text{rest})}^{\text{b}}$ |                                                                                               | -19.08 (16.8 %)                     |

a) Values in parentheses show the contribution to the total attractive interaction. b) Values in parentheses show the contribution to the total orbital interaction  $\Delta E_{\text{orb}}$ . The eigenvalues  $|v_1|$ ,  $|v_2|$  and  $|v_3|$  give the size of the charge migration in e.

The individual orbital interactions for the CDP<sup>Ph</sup> and Ga<sup>+</sup> in monomeric [(CDP<sup>Ph</sup>)Ga]<sup>+</sup> are visualized by the associated deformation densities  $\Delta\rho$ , which are displayed in **Figure S 64** along with the most important fragment orbitals.

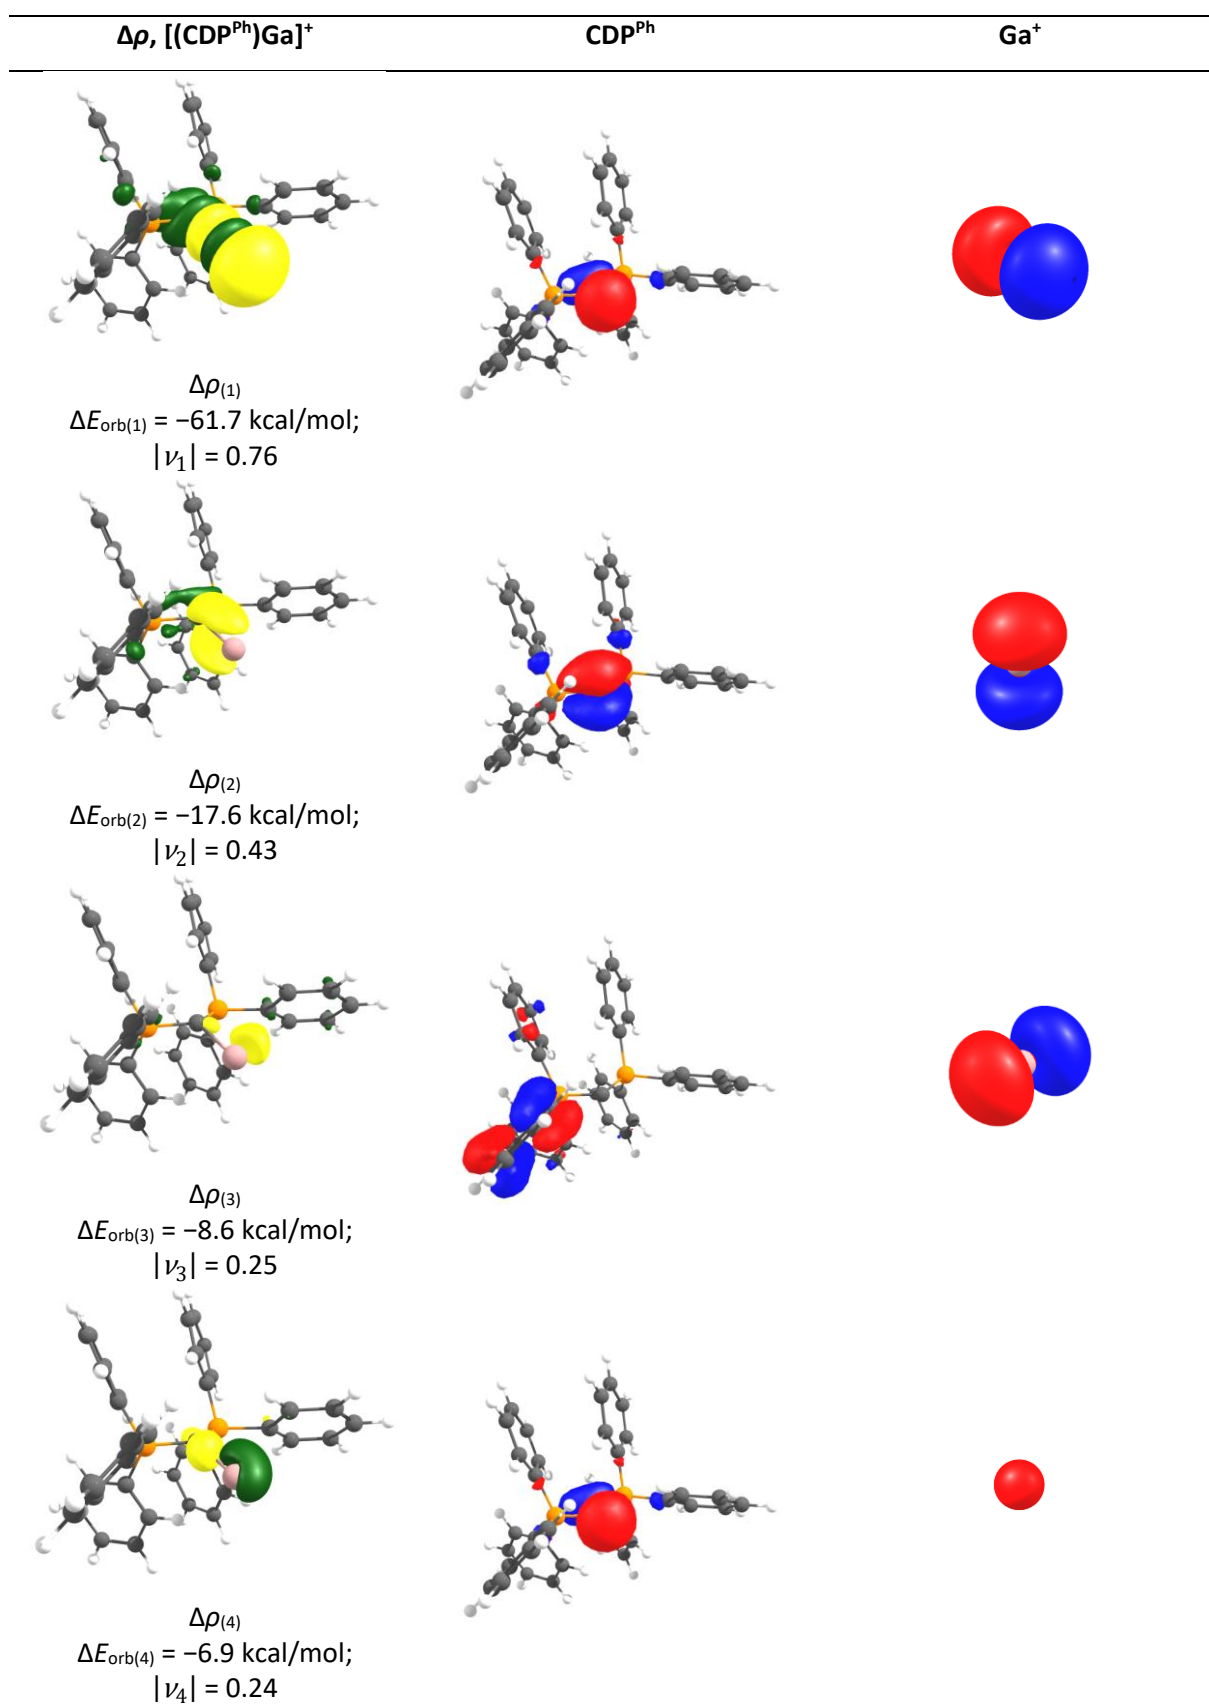

**Figure S 64:** Shape of the deformation densities  $\Delta\rho_{(1)-(4)}$ , corresponding to  $\Delta E_{orb(1)-(4)}$ , and the fragment orbitals of the  $CDP^{Ph}$  moiety and the  $Ga^+$  cation at the RI-BP86(D3BJ)/def2-TZVPP level (Isosurface values: 0.002 au for  $\Delta\rho$  and 0.05 au for the molecular orbitals). The eigenvalues  $|v_{1-4}|$  give the size of the charge migration in e. The direction of the charge flow of the deformation densities is green  $\rightarrow$  yellow.

## 8.4 Structure of $\{[Ga(CDP^{Ph})]_2\}^{2+}$ in the Gas Phase and in the Solid State

The main structural parameters of the crystal structure and the optimized structure of  $2^{2+}$  are compared in **Table S 18**.

**Table S 18:** Comparison of structural parameters in the  $2^{2+}$  complex cation for the optimized structures and the molecular structure found by XRD.

| Structural Parameter           | RI-BP86(D3BJ)/def2-SVP | RI-BP86(D3BJ)/def2-TZVPP | RI-PBEh-3c(D3BJ)/def2-mSVP | Crystal Structure         |
|--------------------------------|------------------------|--------------------------|----------------------------|---------------------------|
| Ga–Ga [pm]                     | 294.3                  | 297.3                    | 297.3                      | 269.00(3)                 |
| $C^{CDP}$ –P [pm]              | 173.5,<br>173.3        | 171.7,<br>171.6          | 171.8,<br>171.4            | 171.27(10),<br>171.19(10) |
| $C^{CDP}$ –Ga [pm]             | 204.7                  | 205.0                    | 202.1                      | 200.56(11)                |
| Ga–Ga– $C^{CDP}$ [°]           | 115.3                  | 115.5                    | 118.2                      | 118.18(3)                 |
| Angle sum around $C^{CDP}$ [°] | 357.3                  | 357.6                    | 359.6                      | 356.3                     |

While the overall structure, *e.g.* the slight pyramidalization around of the  $C^{CDP}$  atom and the trans-bent geometry, is well reproduced by DFT calculations, the experimental bond lengths and angles are in poor agreement with quantum chemical calculations. Calculations at the RI-PBEh-3c(D3BJ)/def2-mSVP level of theory predict the C–Ga bond length and the C–Ga–Ga angle very well, but fail to reproduce the Ga–Ga bond length and the pyramidalization about the central carbon atom. The rather poor agreement of the crystal structure with the optimized structures from quantum chemical calculations may be due to the fact that weak interactions are generally difficult to simulate, and that donor-acceptor bonds are often overestimated in gas phase DFT calculations compared to solid state structures.<sup>[56]</sup> For example, the bond length in a  $\beta$ -diketiminato-indium dimer with “diindene”-character is likewise overestimated by DFT calculations.<sup>[57]</sup>

## 8.5 1<sup>2+</sup>

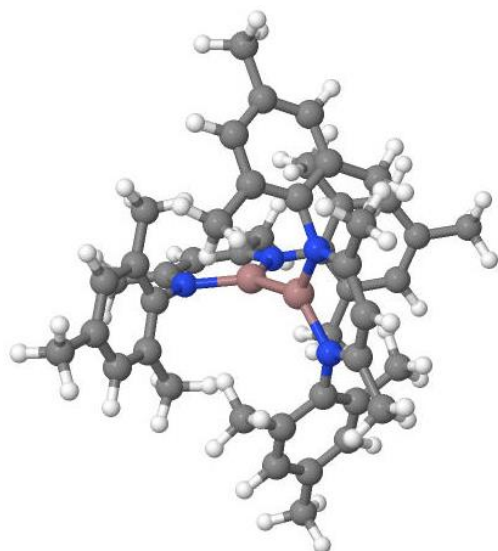

Method: (RI-)BP86(D3BJ)/def2-TZVPP  
Symmetry: c1

Cartesian coordinates in Ångström:

|    |            |            |            |
|----|------------|------------|------------|
| N  | -0.4413626 | 0.1154015  | -1.6557078 |
| C  | -0.6423290 | -1.1977738 | -1.3912982 |
| Ga | -0.2498149 | 1.3689902  | -0.2838043 |
| C  | -0.7203144 | -1.7094195 | -0.0867171 |
| C  | -0.7859075 | -2.1324526 | -2.5541396 |
| C  | -0.6174973 | -1.0393747 | 1.1422183  |
| H  | -0.8847048 | -2.7813575 | -0.0180985 |
| N  | -0.4123424 | 0.2961890  | 1.2371475  |
| C  | -0.7381428 | -1.8218351 | 2.4149017  |
| H  | -1.6287256 | -1.8319731 | -3.1917249 |
| H  | -0.9433175 | -3.1600089 | -2.2165707 |
| H  | 0.1079337  | -2.0982276 | -3.1921428 |
| H  | -0.9023221 | -2.8829651 | 2.2108171  |
| H  | -1.5681368 | -1.4422747 | 3.0266027  |
| H  | 0.1681085  | -1.7109503 | 3.0260763  |
| C  | -0.0080348 | 2.9680474  | 6.3039963  |
| C  | -0.1100953 | 2.2924098  | 4.9646349  |
| C  | -1.3496878 | 2.1404139  | 4.3288230  |
| H  | -2.2456162 | 2.5422369  | 4.8046158  |
| C  | -1.4786504 | 1.4789360  | 3.1032897  |
| C  | -0.3123407 | 0.9555827  | 2.5173441  |
| C  | 0.9555696  | 1.1035907  | 3.1070502  |
| C  | 2.1902371  | 0.5621496  | 2.4383687  |
| C  | 1.0279967  | 1.7735805  | 4.3325910  |
| H  | 2.0018994  | 1.8871308  | 4.8112992  |
| H  | -2.3431847 | 1.9018442  | -5.4405912 |
| C  | -1.5437244 | 1.0573275  | -3.6347831 |
| C  | -1.4380638 | 1.5618065  | -4.9349418 |
| C  | -0.3660998 | 0.6102760  | -3.0097040 |
| C  | -0.2103730 | 1.6340193  | -5.6068318 |
| C  | -0.1335189 | 2.1395860  | -7.0208005 |
| C  | 0.8907738  | 0.6835785  | -3.6361302 |
| C  | 0.9399095  | 1.1969323  | -4.9362000 |
| H  | 1.9048172  | 1.2500882  | -5.4428299 |

|    |            |            |            |
|----|------------|------------|------------|
| H  | 2.1219699  | -0.5187202 | 2.2518737  |
| H  | 3.0762318  | 0.7392141  | 3.0569088  |
| H  | 2.3747275  | 1.0391246  | 1.4618944  |
| H  | -3.6107463 | 1.7684309  | 3.0473435  |
| C  | -2.8171699 | 1.3334207  | 2.4309695  |
| H  | -2.8475593 | 1.8438535  | 1.4543754  |
| H  | 3.0122687  | 0.3248856  | -3.5806844 |
| C  | 2.1382709  | 0.2282483  | -2.9282152 |
| H  | 2.3409253  | 0.8235912  | -2.0229809 |
| H  | -3.6749269 | 1.3523395  | -3.5765505 |
| C  | -2.8694987 | 0.9973327  | -2.9252700 |
| H  | -2.8829553 | 1.6258038  | -2.0198053 |
| H  | -3.0761098 | 0.2819481  | 2.2436878  |
| H  | -3.1230497 | -0.0224390 | -2.6035658 |
| H  | 2.0742838  | -0.8206129 | -2.6064584 |
| H  | -0.9230223 | 2.8707909  | -7.2321200 |
| H  | -0.2596267 | 1.3099658  | -7.7324108 |
| H  | 0.8376460  | 2.6030819  | -7.2321372 |
| H  | -0.7919551 | 3.7233997  | 6.4364736  |
| H  | 0.9677675  | 3.4494711  | 6.4406130  |
| H  | -0.1243894 | 2.2330564  | 7.1144357  |
| H  | 3.4096286  | 3.3287774  | -3.8263923 |
| H  | -3.1496604 | 4.3395284  | -3.8401362 |
| C  | 2.8297234  | 3.7440780  | -2.9956197 |
| C  | -2.4743518 | 4.5614134  | -3.0072900 |
| H  | 2.7381422  | 4.8269916  | -3.1588341 |
| H  | -2.0619232 | 5.5671918  | -3.1686780 |
| H  | -1.6280297 | 3.8587823  | -3.0790366 |
| H  | 1.8119450  | 3.3272312  | -3.0694476 |
| H  | 5.0829214  | 2.2820513  | -2.5401680 |
| H  | -5.0638604 | 3.8431722  | -2.5599735 |
| C  | 3.4787625  | 3.4200919  | -1.6771014 |
| C  | -3.1944309 | 4.4458208  | -1.6909245 |
| C  | 4.6396876  | 2.6429529  | -1.6107452 |
| C  | -4.5352789 | 4.0529657  | -1.6287797 |
| H  | 3.6624414  | 6.3339240  | -1.5043097 |
| H  | -2.4961654 | 7.2787783  | -1.5154427 |
| H  | -6.9441417 | 2.9157391  | -1.2303892 |
| H  | 6.5942423  | 0.8341433  | -1.2021027 |
| Ga | 0.1083440  | 3.7208829  | -0.4350886 |
| C  | -1.8391774 | 7.4441618  | -0.6504903 |
| C  | 3.0823348  | 6.6899510  | -0.6418292 |
| C  | 0.5804861  | 6.7992476  | -0.6286770 |
| C  | 1.7445374  | 6.0161230  | -0.5892423 |
| C  | -0.7647593 | 6.4006104  | -0.5944012 |
| C  | 2.9352337  | 3.8873481  | -0.4672499 |
| C  | -2.5390107 | 4.7265548  | -0.4789154 |
| C  | -5.2184384 | 3.9306773  | -0.4113292 |
| C  | 5.2522553  | 2.3243364  | -0.3912380 |
| C  | -6.6725821 | 3.5496990  | -0.3777636 |
| C  | 6.5252119  | 1.5249885  | -0.3532129 |
| N  | 1.7193108  | 4.6644833  | -0.5047688 |
| N  | -1.1459194 | 5.1033943  | -0.5117463 |
| H  | -1.4107456 | 8.4475769  | -0.7153975 |
| H  | 2.9743102  | 7.7755118  | -0.7088901 |
| H  | 0.7448612  | 7.8712534  | -0.6962437 |
| H  | 7.3988026  | 2.1918753  | -0.4048200 |
| H  | -7.3058851 | 4.4481372  | -0.4257285 |



|   |            |           |           |
|---|------------|-----------|-----------|
| H | -2.4827551 | 7.3865300 | 0.2381297 |
| H | 3.6762137  | 6.4437204 | 0.2491468 |
| H | -6.9305260 | 3.0203663 | 0.5473916 |
| H | 6.6124572  | 0.9477016 | 0.5750906 |
| C | -4.5182858 | 4.1996200 | 0.7725083 |
| C | 4.6626774  | 2.7938468 | 0.7902223 |
| C | -3.1771565 | 4.5964606 | 0.7674006 |
| C | 3.5022950  | 3.5746075 | 0.7809684 |
| H | -5.0335013 | 4.1050937 | 1.7296703 |
| H | 5.1238547  | 2.5514020 | 1.7489126 |
| C | -2.4389550 | 4.8721830 | 2.0495386 |
| C | 2.8777511  | 4.0611886 | 2.0607955 |
| H | 1.8624470  | 3.6571430 | 2.2053301 |
| H | -1.5908563 | 4.1832774 | 2.1951951 |
| H | -2.0255023 | 5.8899491 | 2.0804632 |
| H | 2.7869130  | 5.1560340 | 2.0891036 |
| H | -3.1023988 | 4.7546632 | 2.9126410 |
| H | 3.4741959  | 3.7528645 | 2.9257180 |

SCF energy GEOOPT = -5857.896968119 H  
ZPE = 2374. kJ/mol  
FREEH energy = 2533.76 kJ/mol  
FREEH entropy = 1.43446 kJ/mol/K

\$vibrational spectrum

| # | mode | symmetry | wave number | IR intensity | selection rules |       |
|---|------|----------|-------------|--------------|-----------------|-------|
| # |      |          | cm**(-1)    | km/mol       | IR              | RAMAN |
|   | 1    |          | -0.00       | 0.00000      | -               | -     |
|   | 2    |          | -0.00       | 0.00000      | -               | -     |
|   | 3    |          | -0.00       | 0.00000      | -               | -     |
|   | 4    |          | 0.00        | 0.00000      | -               | -     |
|   | 5    |          | 0.00        | 0.00000      | -               | -     |
|   | 6    |          | 0.00        | 0.00000      | -               | -     |
|   | 7    | a        | 13.13       | 0.00983      | YES             | YES   |
|   | 8    | a        | 14.37       | 0.03722      | YES             | YES   |
|   | 9    | a        | 16.21       | 0.03661      | YES             | YES   |
|   | 10   | a        | 17.24       | 0.00413      | YES             | YES   |
|   | 11   | a        | 18.64       | 0.00086      | YES             | YES   |
|   | 12   | a        | 20.77       | 0.00198      | YES             | YES   |
|   | 13   | a        | 37.02       | 0.00006      | YES             | YES   |
|   | 14   | a        | 38.68       | 0.00010      | YES             | YES   |
|   | 15   | a        | 42.89       | 0.25027      | YES             | YES   |
|   | 16   | a        | 45.24       | 0.30895      | YES             | YES   |
|   | 17   | a        | 45.96       | 0.15765      | YES             | YES   |
|   | 18   | a        | 48.90       | 0.19508      | YES             | YES   |
|   | 19   | a        | 52.45       | 0.05032      | YES             | YES   |
|   | 20   | a        | 52.66       | 0.10252      | YES             | YES   |
|   | 21   | a        | 53.22       | 0.03410      | YES             | YES   |
|   | 22   | a        | 53.88       | 0.01451      | YES             | YES   |
|   | 23   | a        | 58.44       | 0.17150      | YES             | YES   |
|   | 24   | a        | 59.03       | 0.19045      | YES             | YES   |
|   | 25   | a        | 82.42       | 0.00247      | YES             | YES   |
|   | 26   | a        | 87.71       | 0.06216      | YES             | YES   |
|   | 27   | a        | 88.12       | 0.03039      | YES             | YES   |
|   | 28   | a        | 98.00       | 0.00066      | YES             | YES   |
|   | 29   | a        | 99.56       | 0.61626      | YES             | YES   |
|   | 30   | a        | 101.19      | 0.79211      | YES             | YES   |
|   | 31   | a        | 101.49      | 0.28934      | YES             | YES   |

|    |   |        |          |     |     |
|----|---|--------|----------|-----|-----|
| 32 | a | 102.51 | 0.38479  | YES | YES |
| 33 | a | 107.58 | 0.10791  | YES | YES |
| 34 | a | 119.93 | 0.03629  | YES | YES |
| 35 | a | 123.24 | 2.56981  | YES | YES |
| 36 | a | 123.57 | 3.38676  | YES | YES |
| 37 | a | 124.79 | 0.91727  | YES | YES |
| 38 | a | 129.28 | 0.19824  | YES | YES |
| 39 | a | 137.13 | 1.62963  | YES | YES |
| 40 | a | 137.78 | 1.60823  | YES | YES |
| 41 | a | 145.01 | 4.26438  | YES | YES |
| 42 | a | 148.43 | 0.34226  | YES | YES |
| 43 | a | 150.33 | 0.14258  | YES | YES |
| 44 | a | 153.45 | 0.26487  | YES | YES |
| 45 | a | 155.74 | 0.41074  | YES | YES |
| 46 | a | 156.46 | 0.13047  | YES | YES |
| 47 | a | 159.95 | 0.42657  | YES | YES |
| 48 | a | 162.14 | 0.22612  | YES | YES |
| 49 | a | 169.01 | 0.34871  | YES | YES |
| 50 | a | 184.35 | 0.00861  | YES | YES |
| 51 | a | 192.28 | 6.06946  | YES | YES |
| 52 | a | 192.72 | 2.21666  | YES | YES |
| 53 | a | 192.98 | 11.21720 | YES | YES |
| 54 | a | 205.30 | 0.00289  | YES | YES |
| 55 | a | 207.39 | 1.94996  | YES | YES |
| 56 | a | 207.78 | 1.78178  | YES | YES |
| 57 | a | 210.54 | 1.15003  | YES | YES |
| 58 | a | 210.70 | 0.95148  | YES | YES |
| 59 | a | 226.14 | 0.00296  | YES | YES |
| 60 | a | 229.64 | 0.17304  | YES | YES |
| 61 | a | 229.90 | 0.19167  | YES | YES |
| 62 | a | 233.07 | 0.00298  | YES | YES |
| 63 | a | 270.76 | 0.28546  | YES | YES |
| 64 | a | 270.91 | 0.51410  | YES | YES |
| 65 | a | 271.07 | 0.49490  | YES | YES |
| 66 | a | 271.21 | 0.58393  | YES | YES |
| 67 | a | 283.71 | 12.71061 | YES | YES |
| 68 | a | 294.67 | 0.07569  | YES | YES |
| 69 | a | 295.21 | 0.41552  | YES | YES |
| 70 | a | 309.57 | 0.98361  | YES | YES |
| 71 | a | 309.93 | 0.97647  | YES | YES |
| 72 | a | 319.72 | 0.00005  | YES | YES |
| 73 | a | 353.90 | 24.24783 | YES | YES |
| 74 | a | 357.69 | 4.25864  | YES | YES |
| 75 | a | 357.71 | 4.22751  | YES | YES |
| 76 | a | 369.87 | 0.01187  | YES | YES |
| 77 | a | 370.38 | 0.00116  | YES | YES |
| 78 | a | 374.11 | 0.00316  | YES | YES |
| 79 | a | 376.15 | 4.95257  | YES | YES |
| 80 | a | 376.23 | 4.96890  | YES | YES |
| 81 | a | 381.27 | 4.17184  | YES | YES |
| 82 | a | 381.57 | 4.13022  | YES | YES |
| 83 | a | 399.23 | 0.01984  | YES | YES |
| 84 | a | 408.75 | 0.00005  | YES | YES |
| 85 | a | 476.73 | 0.34477  | YES | YES |
| 86 | a | 476.76 | 0.34745  | YES | YES |
| 87 | a | 494.47 | 0.00244  | YES | YES |
| 88 | a | 494.66 | 0.00108  | YES | YES |
| 89 | a | 496.72 | 1.45289  | YES | YES |

|     |   |        |          |     |     |
|-----|---|--------|----------|-----|-----|
| 90  | a | 496.80 | 1.43753  | YES | YES |
| 91  | a | 502.85 | 0.00407  | YES | YES |
| 92  | a | 503.00 | 0.00087  | YES | YES |
| 93  | a | 503.66 | 0.00964  | YES | YES |
| 94  | a | 503.77 | 0.00813  | YES | YES |
| 95  | a | 519.62 | 2.56956  | YES | YES |
| 96  | a | 523.71 | 0.00003  | YES | YES |
| 97  | a | 528.01 | 0.00110  | YES | YES |
| 98  | a | 528.34 | 0.00024  | YES | YES |
| 99  | a | 557.00 | 3.90198  | YES | YES |
| 100 | a | 557.04 | 3.89270  | YES | YES |
| 101 | a | 562.22 | 16.46986 | YES | YES |
| 102 | a | 563.11 | 0.00158  | YES | YES |
| 103 | a | 570.46 | 5.94079  | YES | YES |
| 104 | a | 570.50 | 6.11373  | YES | YES |
| 105 | a | 570.54 | 1.75784  | YES | YES |
| 106 | a | 571.01 | 0.75551  | YES | YES |
| 107 | a | 575.02 | 1.76348  | YES | YES |
| 108 | a | 575.13 | 1.74712  | YES | YES |
| 109 | a | 598.80 | 0.00047  | YES | YES |
| 110 | a | 599.07 | 0.00028  | YES | YES |
| 111 | a | 631.27 | 2.14839  | YES | YES |
| 112 | a | 631.32 | 2.31745  | YES | YES |
| 113 | a | 637.89 | 0.17385  | YES | YES |
| 114 | a | 637.93 | 0.44782  | YES | YES |
| 115 | a | 642.17 | 0.64354  | YES | YES |
| 116 | a | 642.39 | 0.66407  | YES | YES |
| 117 | a | 719.62 | 0.02953  | YES | YES |
| 118 | a | 720.34 | 0.17548  | YES | YES |
| 119 | a | 720.41 | 0.19588  | YES | YES |
| 120 | a | 720.94 | 0.01862  | YES | YES |
| 121 | a | 811.09 | 7.69389  | YES | YES |
| 122 | a | 811.31 | 7.69733  | YES | YES |
| 123 | a | 845.80 | 3.99447  | YES | YES |
| 124 | a | 845.84 | 3.88180  | YES | YES |
| 125 | a | 847.40 | 19.85335 | YES | YES |
| 126 | a | 847.43 | 0.17504  | YES | YES |
| 127 | a | 871.56 | 0.57267  | YES | YES |
| 128 | a | 871.62 | 0.60453  | YES | YES |
| 129 | a | 877.93 | 68.76695 | YES | YES |
| 130 | a | 879.12 | 0.07373  | YES | YES |
| 131 | a | 886.13 | 0.05801  | YES | YES |
| 132 | a | 886.52 | 0.16355  | YES | YES |
| 133 | a | 887.00 | 0.17883  | YES | YES |
| 134 | a | 887.24 | 0.13528  | YES | YES |
| 135 | a | 925.24 | 0.96687  | YES | YES |
| 136 | a | 925.36 | 1.11906  | YES | YES |
| 137 | a | 925.46 | 0.51758  | YES | YES |
| 138 | a | 925.47 | 0.35286  | YES | YES |
| 139 | a | 928.48 | 1.22069  | YES | YES |
| 140 | a | 930.54 | 0.00043  | YES | YES |
| 141 | a | 941.52 | 3.86773  | YES | YES |
| 142 | a | 941.54 | 3.81472  | YES | YES |
| 143 | a | 963.01 | 5.13480  | YES | YES |
| 144 | a | 963.04 | 5.15187  | YES | YES |
| 145 | a | 963.98 | 0.01228  | YES | YES |
| 146 | a | 964.55 | 0.00636  | YES | YES |
| 147 | a | 994.26 | 3.54212  | YES | YES |

|     |   |         |           |     |     |
|-----|---|---------|-----------|-----|-----|
| 148 | a | 994.48  | 12.48490  | YES | YES |
| 149 | a | 994.56  | 9.75590   | YES | YES |
| 150 | a | 994.77  | 4.52945   | YES | YES |
| 151 | a | 1005.58 | 0.02099   | YES | YES |
| 152 | a | 1005.76 | 0.01961   | YES | YES |
| 153 | a | 1005.80 | 0.03545   | YES | YES |
| 154 | a | 1005.92 | 0.00023   | YES | YES |
| 155 | a | 1008.01 | 7.24066   | YES | YES |
| 156 | a | 1008.07 | 8.36598   | YES | YES |
| 157 | a | 1012.55 | 49.19301  | YES | YES |
| 158 | a | 1013.97 | 0.02037   | YES | YES |
| 159 | a | 1014.79 | 0.73093   | YES | YES |
| 160 | a | 1014.89 | 1.62308   | YES | YES |
| 161 | a | 1016.53 | 0.47008   | YES | YES |
| 162 | a | 1016.77 | 0.03915   | YES | YES |
| 163 | a | 1020.47 | 0.08728   | YES | YES |
| 164 | a | 1021.43 | 0.06208   | YES | YES |
| 165 | a | 1021.52 | 0.23321   | YES | YES |
| 166 | a | 1021.74 | 0.06240   | YES | YES |
| 167 | a | 1023.05 | 1.72132   | YES | YES |
| 168 | a | 1023.09 | 0.22870   | YES | YES |
| 169 | a | 1023.22 | 3.37651   | YES | YES |
| 170 | a | 1023.34 | 14.40212  | YES | YES |
| 171 | a | 1023.51 | 25.60519  | YES | YES |
| 172 | a | 1023.68 | 14.87318  | YES | YES |
| 173 | a | 1024.37 | 15.62716  | YES | YES |
| 174 | a | 1025.62 | 0.02149   | YES | YES |
| 175 | a | 1027.26 | 0.03451   | YES | YES |
| 176 | a | 1027.51 | 0.03511   | YES | YES |
| 177 | a | 1027.68 | 0.02036   | YES | YES |
| 178 | a | 1028.82 | 0.00423   | YES | YES |
| 179 | a | 1141.10 | 4.60042   | YES | YES |
| 180 | a | 1141.18 | 4.61311   | YES | YES |
| 181 | a | 1148.26 | 1.69768   | YES | YES |
| 182 | a | 1149.32 | 0.00305   | YES | YES |
| 183 | a | 1188.17 | 11.82293  | YES | YES |
| 184 | a | 1188.28 | 11.86710  | YES | YES |
| 185 | a | 1212.93 | 4.83731   | YES | YES |
| 186 | a | 1214.88 | 0.00070   | YES | YES |
| 187 | a | 1234.35 | 50.25131  | YES | YES |
| 188 | a | 1234.55 | 50.21481  | YES | YES |
| 189 | a | 1240.29 | 0.12671   | YES | YES |
| 190 | a | 1240.40 | 0.09269   | YES | YES |
| 191 | a | 1240.63 | 0.05169   | YES | YES |
| 192 | a | 1240.94 | 0.00897   | YES | YES |
| 193 | a | 1285.99 | 5.26581   | YES | YES |
| 194 | a | 1286.10 | 65.95875  | YES | YES |
| 195 | a | 1301.00 | 20.37717  | YES | YES |
| 196 | a | 1301.01 | 17.63103  | YES | YES |
| 197 | a | 1301.23 | 4.93337   | YES | YES |
| 198 | a | 1301.81 | 0.18763   | YES | YES |
| 199 | a | 1322.50 | 0.16764   | YES | YES |
| 200 | a | 1322.73 | 1.73775   | YES | YES |
| 201 | a | 1322.78 | 1.57221   | YES | YES |
| 202 | a | 1323.16 | 0.09518   | YES | YES |
| 203 | a | 1350.24 | 297.32348 | YES | YES |
| 204 | a | 1350.32 | 298.65593 | YES | YES |
| 205 | a | 1358.24 | 2.58054   | YES | YES |

|     |   |         |           |     |     |
|-----|---|---------|-----------|-----|-----|
| 206 | a | 1359.02 | 2.05703   | YES | YES |
| 207 | a | 1362.62 | 39.79768  | YES | YES |
| 208 | a | 1362.87 | 37.53476  | YES | YES |
| 209 | a | 1368.85 | 13.41986  | YES | YES |
| 210 | a | 1368.99 | 18.17588  | YES | YES |
| 211 | a | 1369.14 | 8.75350   | YES | YES |
| 212 | a | 1369.40 | 3.07982   | YES | YES |
| 213 | a | 1369.48 | 0.49910   | YES | YES |
| 214 | a | 1372.29 | 0.73431   | YES | YES |
| 215 | a | 1372.38 | 0.82274   | YES | YES |
| 216 | a | 1373.66 | 0.02656   | YES | YES |
| 217 | a | 1377.09 | 0.51625   | YES | YES |
| 218 | a | 1377.93 | 3.80809   | YES | YES |
| 219 | a | 1377.99 | 3.98842   | YES | YES |
| 220 | a | 1380.48 | 0.10343   | YES | YES |
| 221 | a | 1394.69 | 0.07089   | YES | YES |
| 222 | a | 1396.06 | 11.08095  | YES | YES |
| 223 | a | 1396.10 | 10.87999  | YES | YES |
| 224 | a | 1396.98 | 0.14711   | YES | YES |
| 225 | a | 1404.46 | 60.26270  | YES | YES |
| 226 | a | 1405.57 | 19.96490  | YES | YES |
| 227 | a | 1405.75 | 21.13420  | YES | YES |
| 228 | a | 1407.33 | 0.29387   | YES | YES |
| 229 | a | 1417.27 | 4.19585   | YES | YES |
| 230 | a | 1417.52 | 1.01613   | YES | YES |
| 231 | a | 1418.18 | 26.77897  | YES | YES |
| 232 | a | 1418.23 | 22.09754  | YES | YES |
| 233 | a | 1420.30 | 247.66913 | YES | YES |
| 234 | a | 1420.59 | 3.62726   | YES | YES |
| 235 | a | 1431.59 | 28.04691  | YES | YES |
| 236 | a | 1431.83 | 28.46738  | YES | YES |
| 237 | a | 1432.27 | 14.81158  | YES | YES |
| 238 | a | 1432.48 | 20.35077  | YES | YES |
| 239 | a | 1435.29 | 0.25687   | YES | YES |
| 240 | a | 1435.77 | 0.73512   | YES | YES |
| 241 | a | 1436.50 | 16.60554  | YES | YES |
| 242 | a | 1436.55 | 15.71113  | YES | YES |
| 243 | a | 1437.38 | 0.62231   | YES | YES |
| 244 | a | 1437.53 | 0.56227   | YES | YES |
| 245 | a | 1438.08 | 0.24772   | YES | YES |
| 246 | a | 1439.54 | 11.85765  | YES | YES |
| 247 | a | 1439.66 | 10.83517  | YES | YES |
| 248 | a | 1440.65 | 0.83538   | YES | YES |
| 249 | a | 1441.36 | 13.91806  | YES | YES |
| 250 | a | 1441.45 | 6.82796   | YES | YES |
| 251 | a | 1441.52 | 6.11585   | YES | YES |
| 252 | a | 1441.59 | 4.87924   | YES | YES |
| 253 | a | 1455.55 | 2.30934   | YES | YES |
| 254 | a | 1456.14 | 31.46319  | YES | YES |
| 255 | a | 1456.23 | 51.89979  | YES | YES |
| 256 | a | 1456.44 | 19.90883  | YES | YES |
| 257 | a | 1468.43 | 46.57304  | YES | YES |
| 258 | a | 1468.44 | 48.74974  | YES | YES |
| 259 | a | 1469.28 | 53.17038  | YES | YES |
| 260 | a | 1469.38 | 2.00352   | YES | YES |
| 261 | a | 1495.57 | 260.61527 | YES | YES |
| 262 | a | 1499.69 | 0.00901   | YES | YES |
| 263 | a | 1539.39 | 288.65622 | YES | YES |

|     |   |         |           |     |     |
|-----|---|---------|-----------|-----|-----|
| 264 | a | 1539.46 | 288.70544 | YES | YES |
| 265 | a | 1572.18 | 5.28449   | YES | YES |
| 266 | a | 1572.21 | 5.26756   | YES | YES |
| 267 | a | 1572.64 | 0.01556   | YES | YES |
| 268 | a | 1572.95 | 0.01827   | YES | YES |
| 269 | a | 1594.91 | 31.82498  | YES | YES |
| 270 | a | 1594.97 | 27.07249  | YES | YES |
| 271 | a | 1595.10 | 64.45992  | YES | YES |
| 272 | a | 1595.16 | 54.70487  | YES | YES |
| 273 | a | 2945.71 | 17.09640  | YES | YES |
| 274 | a | 2946.19 | 28.47532  | YES | YES |
| 275 | a | 2946.29 | 15.57536  | YES | YES |
| 276 | a | 2946.51 | 31.63965  | YES | YES |
| 277 | a | 2946.63 | 14.47065  | YES | YES |
| 278 | a | 2946.96 | 10.08513  | YES | YES |
| 279 | a | 2947.27 | 15.39638  | YES | YES |
| 280 | a | 2947.38 | 0.59867   | YES | YES |
| 281 | a | 2972.98 | 5.08069   | YES | YES |
| 282 | a | 2972.98 | 5.88325   | YES | YES |
| 283 | a | 2972.99 | 5.00807   | YES | YES |
| 284 | a | 2973.00 | 2.37948   | YES | YES |
| 285 | a | 2984.11 | 0.09474   | YES | YES |
| 286 | a | 2984.14 | 0.10292   | YES | YES |
| 287 | a | 2984.31 | 0.10445   | YES | YES |
| 288 | a | 2984.52 | 0.10335   | YES | YES |
| 289 | a | 3006.19 | 1.36259   | YES | YES |
| 290 | a | 3006.39 | 3.48471   | YES | YES |
| 291 | a | 3006.47 | 3.23765   | YES | YES |
| 292 | a | 3006.50 | 4.68748   | YES | YES |
| 293 | a | 3006.76 | 17.58986  | YES | YES |
| 294 | a | 3006.84 | 40.22633  | YES | YES |
| 295 | a | 3006.91 | 13.67634  | YES | YES |
| 296 | a | 3007.13 | 1.41804   | YES | YES |
| 297 | a | 3033.36 | 1.62886   | YES | YES |
| 298 | a | 3033.36 | 5.02341   | YES | YES |
| 299 | a | 3033.37 | 2.26890   | YES | YES |
| 300 | a | 3033.39 | 15.27196  | YES | YES |
| 301 | a | 3036.85 | 0.13541   | YES | YES |
| 302 | a | 3036.90 | 0.10628   | YES | YES |
| 303 | a | 3037.06 | 0.20352   | YES | YES |
| 304 | a | 3037.30 | 0.17513   | YES | YES |
| 305 | a | 3062.30 | 4.52691   | YES | YES |
| 306 | a | 3062.33 | 5.29302   | YES | YES |
| 307 | a | 3062.36 | 6.71800   | YES | YES |
| 308 | a | 3062.37 | 4.55629   | YES | YES |
| 309 | a | 3064.72 | 0.08615   | YES | YES |
| 310 | a | 3064.83 | 0.46556   | YES | YES |
| 311 | a | 3064.89 | 0.55937   | YES | YES |
| 312 | a | 3065.21 | 10.81548  | YES | YES |
| 313 | a | 3065.94 | 1.94352   | YES | YES |
| 314 | a | 3066.07 | 21.54800  | YES | YES |
| 315 | a | 3066.11 | 22.06409  | YES | YES |
| 316 | a | 3066.35 | 0.61825   | YES | YES |
| 317 | a | 3094.17 | 7.37191   | YES | YES |
| 318 | a | 3094.23 | 5.96474   | YES | YES |
| 319 | a | 3094.44 | 0.04307   | YES | YES |
| 320 | a | 3094.50 | 0.03913   | YES | YES |
| 321 | a | 3097.15 | 0.48506   | YES | YES |

|      |   |         |          |     |     |
|------|---|---------|----------|-----|-----|
| 322  | a | 3097.28 | 10.54623 | YES | YES |
| 323  | a | 3097.31 | 10.89891 | YES | YES |
| 324  | a | 3097.43 | 0.63824  | YES | YES |
| 325  | a | 3098.38 | 1.85094  | YES | YES |
| 326  | a | 3098.43 | 5.31175  | YES | YES |
| 327  | a | 3098.45 | 4.18134  | YES | YES |
| 328  | a | 3098.54 | 0.38599  | YES | YES |
| 329  | a | 3145.96 | 0.13860  | YES | YES |
| 330  | a | 3146.02 | 0.12593  | YES | YES |
| §end |   |         |          |     |     |

COSMO energy + OC correction = -5858.0516036994 H

## 8.6 [Ga(NacNac<sup>Mes</sup>)]<sup>+</sup>

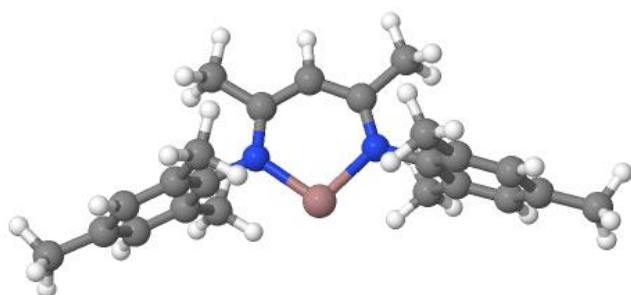

Method: (RI-)BP86(D3BJ)/def2-TZVPP

Symmetry: c1

Cartesian coordinates in Ångström:

|    |            |            |            |
|----|------------|------------|------------|
| H  | -4.7908348 | 0.0057055  | 1.4822288  |
| H  | 0.0055929  | -4.7906808 | 1.4819315  |
| C  | -3.7305044 | 0.1507858  | 1.7143936  |
| C  | 0.1505600  | -3.7302339 | 1.7136075  |
| H  | -3.5613564 | -0.1704114 | 2.7520774  |
| H  | -0.1710712 | -3.5605540 | 2.7510518  |
| H  | -0.5391683 | -3.1543567 | 1.0745829  |
| H  | -3.1542700 | -0.5392070 | 1.0759580  |
| H  | -5.2450485 | 2.2043402  | 0.7652642  |
| H  | 2.2044373  | -5.2451375 | 0.7657562  |
| C  | -3.3211578 | 1.5797987  | 1.4846446  |
| C  | 1.5796459  | -3.3209728 | 1.4841855  |
| C  | -4.2217353 | 2.5187287  | 0.9765014  |
| C  | 2.5187660  | -4.2217673 | 0.9767900  |
| H  | -2.8160730 | 1.5741010  | 4.3149206  |
| H  | 1.5743631  | -2.8163144 | 4.3139629  |
| H  | 4.3616201  | -5.6219984 | -0.3943174 |
| H  | -5.6217790 | 4.3613984  | -0.3951619 |
| Ga | 0.0002222  | 0.0005958  | 1.0173521  |
| C  | 1.7499838  | -1.7494232 | 4.5067236  |
| C  | -1.7491227 | 1.7496883  | 4.5075174  |
| C  | 0.0002526  | -0.0000177 | 4.1884436  |
| C  | -0.9005775 | 0.9008856  | 3.6014518  |
| C  | 0.9010182  | -0.9007099 | 3.6009813  |
| C  | -2.0078403 | 2.0080173  | 1.7574724  |
| C  | 2.0077921  | -2.0076131 | 1.7567545  |
| C  | 3.8459233  | -3.8464734 | 0.7253078  |
| C  | -3.8463342 | 3.8457829  | 0.7246340  |

|   |            |            |            |
|---|------------|------------|------------|
| C | 4.8444620  | -4.8454172 | 0.2112269  |
| C | -4.8452369 | 4.8442806  | 0.2104014  |
| N | -1.0590074 | 1.0594903  | 2.2663965  |
| N | 1.0593501  | -1.0588668 | 2.2659186  |
| H | 1.5353966  | -1.5348841 | 5.5570811  |
| H | -1.5343841 | 1.5349034  | 5.5578067  |
| H | 0.0004036  | -0.0001359 | 5.2747666  |
| H | -5.3509441 | 5.3497395  | 1.0473570  |
| H | 5.3498677  | -5.3510681 | 1.0482476  |
| H | 2.8168159  | -1.5734600 | 4.3139439  |
| H | -1.5731897 | 2.8165784  | 4.3148985  |
| H | 5.6212743  | -4.3628805 | -0.3942661 |
| H | -4.3626591 | 5.6210561  | -0.3951070 |
| C | 4.2218325  | -2.5195445 | 0.9771042  |
| C | -2.5195093 | 4.2217999  | 0.9768190  |
| C | 3.3213905  | -1.5800374 | 1.4844201  |
| C | -1.5801918 | 3.3215734  | 1.4848789  |
| H | 5.2454380  | -2.2057269 | 0.7664488  |
| H | -2.2056336 | 5.2453503  | 0.7659666  |
| C | 3.7313850  | -0.1512425 | 1.7143492  |
| C | -0.1514675 | 3.7316503  | 1.7151251  |
| H | 0.5390620  | 3.1558737  | 1.0768579  |
| H | 3.1559666  | 0.5390282  | 1.0754982  |
| H | 3.5617532  | 0.1701188  | 2.7518876  |
| H | 0.1694664  | 3.5625492  | 2.7529006  |
| H | 4.7919426  | -0.0067765 | 1.4828646  |
| H | -0.0068877 | 4.7920914  | 1.4831511  |

SCF energy GEOOPT = -2928.910685675 H

ZPE = 1181. kJ/mol

FREEH energy = 1259.64 kJ/mol

FREEH entropy = 0.83017 kJ/mol/K

\$vibrational spectrum

| # | mode | symmetry | wave number<br>cm**(-1) | IR intensity<br>km/mol | selection rules |       |
|---|------|----------|-------------------------|------------------------|-----------------|-------|
| # |      |          |                         |                        | IR              | RAMAN |
|   | 1    |          | -0.00                   | 0.00000                | -               | -     |
|   | 2    |          | 0.00                    | 0.00000                | -               | -     |
|   | 3    |          | 0.00                    | 0.00000                | -               | -     |
|   | 4    |          | 0.00                    | 0.00000                | -               | -     |
|   | 5    |          | 0.00                    | 0.00000                | -               | -     |
|   | 6    |          | 0.00                    | 0.00000                | -               | -     |
|   | 7    | a        | 15.03                   | 0.01319                | YES             | YES   |
|   | 8    | a        | 17.00                   | 0.00012                | YES             | YES   |
|   | 9    | a        | 32.51                   | 0.01198                | YES             | YES   |
|   | 10   | a        | 37.92                   | 0.13491                | YES             | YES   |
|   | 11   | a        | 38.07                   | 0.35948                | YES             | YES   |
|   | 12   | a        | 41.68                   | 0.00574                | YES             | YES   |
|   | 13   | a        | 53.90                   | 0.85453                | YES             | YES   |
|   | 14   | a        | 55.68                   | 0.00000                | YES             | YES   |
|   | 15   | a        | 87.89                   | 1.20491                | YES             | YES   |
|   | 16   | a        | 104.98                  | 0.12984                | YES             | YES   |
|   | 17   | a        | 118.85                  | 0.00000                | YES             | YES   |
|   | 18   | a        | 130.10                  | 0.46535                | YES             | YES   |
|   | 19   | a        | 131.85                  | 0.01355                | YES             | YES   |
|   | 20   | a        | 135.98                  | 0.11732                | YES             | YES   |
|   | 21   | a        | 136.69                  | 0.18672                | YES             | YES   |
|   | 22   | a        | 137.08                  | 1.09312                | YES             | YES   |



|    |   |         |          |     |     |
|----|---|---------|----------|-----|-----|
| 23 | a | 139.85  | 0.00018  | YES | YES |
| 24 | a | 147.61  | 0.74079  | YES | YES |
| 25 | a | 151.37  | 0.00544  | YES | YES |
| 26 | a | 179.96  | 7.41872  | YES | YES |
| 27 | a | 183.77  | 1.81629  | YES | YES |
| 28 | a | 206.90  | 0.98844  | YES | YES |
| 29 | a | 209.82  | 0.00225  | YES | YES |
| 30 | a | 220.73  | 0.01276  | YES | YES |
| 31 | a | 220.84  | 0.00068  | YES | YES |
| 32 | a | 251.84  | 3.20123  | YES | YES |
| 33 | a | 269.38  | 0.67504  | YES | YES |
| 34 | a | 269.54  | 0.00066  | YES | YES |
| 35 | a | 290.26  | 0.17843  | YES | YES |
| 36 | a | 298.03  | 6.52160  | YES | YES |
| 37 | a | 324.05  | 0.01347  | YES | YES |
| 38 | a | 346.08  | 4.98745  | YES | YES |
| 39 | a | 361.91  | 2.36479  | YES | YES |
| 40 | a | 370.10  | 0.00020  | YES | YES |
| 41 | a | 380.98  | 10.30488 | YES | YES |
| 42 | a | 401.91  | 0.49169  | YES | YES |
| 43 | a | 470.44  | 69.18577 | YES | YES |
| 44 | a | 490.30  | 1.93629  | YES | YES |
| 45 | a | 491.60  | 0.00007  | YES | YES |
| 46 | a | 494.46  | 0.93757  | YES | YES |
| 47 | a | 496.99  | 0.05961  | YES | YES |
| 48 | a | 500.44  | 0.00001  | YES | YES |
| 49 | a | 525.33  | 0.00000  | YES | YES |
| 50 | a | 550.58  | 16.84422 | YES | YES |
| 51 | a | 563.92  | 8.90897  | YES | YES |
| 52 | a | 569.92  | 0.05958  | YES | YES |
| 53 | a | 570.09  | 0.04091  | YES | YES |
| 54 | a | 571.60  | 1.55996  | YES | YES |
| 55 | a | 594.69  | 0.00003  | YES | YES |
| 56 | a | 616.81  | 0.01319  | YES | YES |
| 57 | a | 620.77  | 30.45469 | YES | YES |
| 58 | a | 640.07  | 0.22137  | YES | YES |
| 59 | a | 715.91  | 0.27560  | YES | YES |
| 60 | a | 724.26  | 47.94845 | YES | YES |
| 61 | a | 795.32  | 10.60307 | YES | YES |
| 62 | a | 816.12  | 2.11475  | YES | YES |
| 63 | a | 820.92  | 65.47330 | YES | YES |
| 64 | a | 852.67  | 37.87895 | YES | YES |
| 65 | a | 853.31  | 3.22857  | YES | YES |
| 66 | a | 879.49  | 0.10534  | YES | YES |
| 67 | a | 879.61  | 0.19066  | YES | YES |
| 68 | a | 925.27  | 1.99712  | YES | YES |
| 69 | a | 925.50  | 0.07927  | YES | YES |
| 70 | a | 927.34  | 0.01082  | YES | YES |
| 71 | a | 933.38  | 19.68501 | YES | YES |
| 72 | a | 958.40  | 13.41381 | YES | YES |
| 73 | a | 959.94  | 0.07513  | YES | YES |
| 74 | a | 990.39  | 20.73660 | YES | YES |
| 75 | a | 991.91  | 0.09300  | YES | YES |
| 76 | a | 1005.40 | 0.26327  | YES | YES |
| 77 | a | 1005.69 | 0.00002  | YES | YES |
| 78 | a | 1006.96 | 8.94786  | YES | YES |
| 79 | a | 1006.98 | 11.91739 | YES | YES |
| 80 | a | 1014.48 | 6.06764  | YES | YES |

|     |   |         |           |     |     |
|-----|---|---------|-----------|-----|-----|
| 81  | a | 1015.97 | 0.00004   | YES | YES |
| 82  | a | 1019.13 | 0.97772   | YES | YES |
| 83  | a | 1019.44 | 0.03301   | YES | YES |
| 84  | a | 1020.44 | 1.57610   | YES | YES |
| 85  | a | 1020.68 | 9.46469   | YES | YES |
| 86  | a | 1021.42 | 73.36814  | YES | YES |
| 87  | a | 1022.68 | 3.77680   | YES | YES |
| 88  | a | 1027.52 | 0.12645   | YES | YES |
| 89  | a | 1028.02 | 0.00070   | YES | YES |
| 90  | a | 1129.63 | 114.64825 | YES | YES |
| 91  | a | 1145.66 | 0.44237   | YES | YES |
| 92  | a | 1180.41 | 5.91079   | YES | YES |
| 93  | a | 1206.25 | 1.93498   | YES | YES |
| 94  | a | 1226.24 | 42.13008  | YES | YES |
| 95  | a | 1240.29 | 0.00001   | YES | YES |
| 96  | a | 1240.76 | 0.00013   | YES | YES |
| 97  | a | 1264.72 | 23.16405  | YES | YES |
| 98  | a | 1290.06 | 269.74000 | YES | YES |
| 99  | a | 1296.64 | 0.12589   | YES | YES |
| 100 | a | 1322.75 | 2.52837   | YES | YES |
| 101 | a | 1323.02 | 0.84118   | YES | YES |
| 102 | a | 1335.83 | 4.63070   | YES | YES |
| 103 | a | 1357.26 | 5.23233   | YES | YES |
| 104 | a | 1357.69 | 2.02005   | YES | YES |
| 105 | a | 1366.84 | 0.02341   | YES | YES |
| 106 | a | 1366.84 | 0.51464   | YES | YES |
| 107 | a | 1366.90 | 17.24834  | YES | YES |
| 108 | a | 1367.86 | 9.42013   | YES | YES |
| 109 | a | 1372.61 | 4.79808   | YES | YES |
| 110 | a | 1374.03 | 0.09447   | YES | YES |
| 111 | a | 1397.67 | 0.04953   | YES | YES |
| 112 | a | 1397.89 | 4.50840   | YES | YES |
| 113 | a | 1402.63 | 63.15577  | YES | YES |
| 114 | a | 1404.47 | 12.10456  | YES | YES |
| 115 | a | 1418.06 | 0.55070   | YES | YES |
| 116 | a | 1418.78 | 22.56656  | YES | YES |
| 117 | a | 1418.89 | 106.85453 | YES | YES |
| 118 | a | 1432.60 | 4.10761   | YES | YES |
| 119 | a | 1433.44 | 34.22922  | YES | YES |
| 120 | a | 1434.05 | 0.04495   | YES | YES |
| 121 | a | 1434.60 | 1.98921   | YES | YES |
| 122 | a | 1436.17 | 0.00339   | YES | YES |
| 123 | a | 1436.25 | 9.67132   | YES | YES |
| 124 | a | 1437.30 | 0.12732   | YES | YES |
| 125 | a | 1440.76 | 8.47779   | YES | YES |
| 126 | a | 1440.80 | 16.94764  | YES | YES |
| 127 | a | 1457.38 | 0.31339   | YES | YES |
| 128 | a | 1457.60 | 53.30553  | YES | YES |
| 129 | a | 1463.76 | 0.48034   | YES | YES |
| 130 | a | 1464.52 | 15.43852  | YES | YES |
| 131 | a | 1498.27 | 104.29536 | YES | YES |
| 132 | a | 1528.45 | 36.49513  | YES | YES |
| 133 | a | 1558.63 | 11.07865  | YES | YES |
| 134 | a | 1559.70 | 0.02901   | YES | YES |
| 135 | a | 1592.39 | 557.99405 | YES | YES |
| 136 | a | 1593.05 | 8.59222   | YES | YES |
| 137 | a | 2941.82 | 0.01134   | YES | YES |
| 138 | a | 2942.64 | 11.29819  | YES | YES |

|     |   |         |           |     |     |
|-----|---|---------|-----------|-----|-----|
| 139 | a | 2943.64 | 105.55812 | YES | YES |
| 140 | a | 2944.23 | 0.22730   | YES | YES |
| 141 | a | 2967.48 | 1.34724   | YES | YES |
| 142 | a | 2967.50 | 0.39184   | YES | YES |
| 143 | a | 2985.07 | 1.18587   | YES | YES |
| 144 | a | 2985.09 | 1.16246   | YES | YES |
| 145 | a | 3001.20 | 0.00052   | YES | YES |
| 146 | a | 3001.42 | 9.29578   | YES | YES |
| 147 | a | 3001.89 | 14.34030  | YES | YES |
| 148 | a | 3002.28 | 32.82117  | YES | YES |
| 149 | a | 3028.90 | 13.80781  | YES | YES |
| 150 | a | 3028.94 | 14.54889  | YES | YES |
| 151 | a | 3040.19 | 0.40642   | YES | YES |
| 152 | a | 3040.21 | 0.69921   | YES | YES |
| 153 | a | 3060.56 | 5.59000   | YES | YES |
| 154 | a | 3060.57 | 7.54381   | YES | YES |
| 155 | a | 3064.63 | 1.94883   | YES | YES |
| 156 | a | 3064.75 | 16.33744  | YES | YES |
| 157 | a | 3064.85 | 27.41751  | YES | YES |
| 158 | a | 3065.09 | 4.58529   | YES | YES |
| 159 | a | 3088.85 | 11.04516  | YES | YES |
| 160 | a | 3089.22 | 0.23630   | YES | YES |
| 161 | a | 3097.37 | 6.20297   | YES | YES |
| 162 | a | 3097.40 | 9.55745   | YES | YES |
| 163 | a | 3098.49 | 33.77893  | YES | YES |
| 164 | a | 3098.62 | 1.30730   | YES | YES |
| 165 | a | 3145.36 | 0.29430   | YES | YES |

§end

COSMO energy + OC correction = -2928.9628423506 H

## 8.7 2<sup>2+</sup> (optimized in the gas phase)

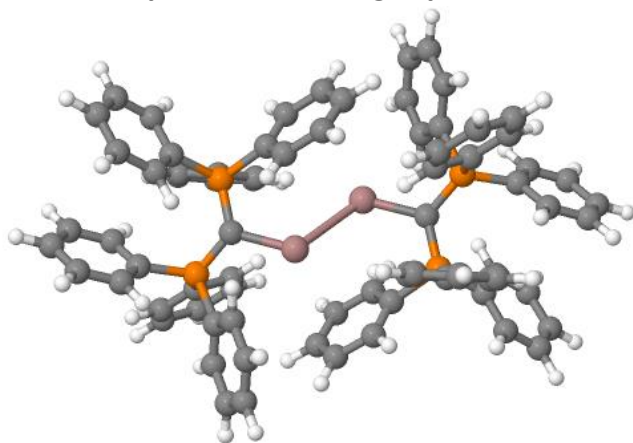

Method: (RI-)BP86(D3BJ)/def2-TZVPP

Symmetry: ci

Cartesian coordinates in Ångström:

```

Ga  -1.4822481  -0.0509055  0.0980367
P   -1.7885651  2.1093451  -2.2959706
C   -2.4983425  0.7762944  -1.4783886
P   -3.7568555  -0.1522297  -2.1845218
C   -0.5112288  2.7750740  -1.1831924
C   -0.8192377  2.8750878  0.1867291

```

|   |            |            |            |
|---|------------|------------|------------|
| H | -1.8295599 | 2.6547562  | 0.5335066  |
| C | 0.1548861  | 3.2900281  | 1.0965034  |
| H | -0.0869485 | 3.3591413  | 2.1557127  |
| C | 1.4322136  | 3.6305844  | 0.6457577  |
| H | 2.1959462  | 3.9379744  | 1.3579301  |
| C | 1.7178383  | 3.6051186  | -0.7222127 |
| H | 2.7044657  | 3.8980748  | -1.0765503 |
| C | 0.7503463  | 3.1849060  | -1.6358404 |
| H | 0.9878944  | 3.1525357  | -2.6973561 |
| C | -0.9778305 | 1.6404970  | -3.8490186 |
| C | -1.6224548 | 1.8035591  | -5.0840617 |
| H | -2.5492748 | 2.3706671  | -5.1439337 |
| C | -1.0756547 | 1.2473656  | -6.2415710 |
| H | -1.5855819 | 1.3773341  | -7.1952307 |
| C | 0.1236497  | 0.5362122  | -6.1790937 |
| H | 0.5524549  | 0.1104104  | -7.0853601 |
| C | 0.7733633  | 0.3739364  | -4.9518305 |
| H | 1.7101934  | -0.1803322 | -4.8993182 |
| C | 0.2225302  | 0.9097163  | -3.7903879 |
| H | 0.7129457  | 0.7437662  | -2.8290370 |
| C | -2.9096705 | 3.4925808  | -2.6194952 |
| C | -4.0528765 | 3.6182015  | -1.8178971 |
| H | -4.2696939 | 2.8545834  | -1.0727422 |
| C | -4.9115452 | 4.7009478  | -1.9942555 |
| H | -5.8056472 | 4.7884655  | -1.3787580 |
| C | -4.6276235 | 5.6668566  | -2.9632546 |
| H | -5.3022594 | 6.5103522  | -3.1052683 |
| C | -3.4730463 | 5.5600785  | -3.7439823 |
| H | -3.2436652 | 6.3221453  | -4.4877818 |
| C | -2.6080381 | 4.4797933  | -3.5706447 |
| H | -1.7030273 | 4.4090438  | -4.1729456 |
| C | -3.2319471 | -1.2023757 | -3.5668473 |
| C | -4.1436417 | -1.6648893 | -4.5299513 |
| H | -5.1902985 | -1.3664216 | -4.4817148 |
| C | -3.7047156 | -2.5024183 | -5.5557069 |
| H | -4.4124301 | -2.8585169 | -6.3032879 |
| C | -2.3603287 | -2.8787890 | -5.6265599 |
| H | -2.0194495 | -3.5255046 | -6.4342967 |
| C | -1.4537236 | -2.4214741 | -4.6667129 |
| H | -0.4033315 | -2.7037173 | -4.7317505 |
| C | -1.8875649 | -1.5884172 | -3.6372747 |
| H | -1.1871266 | -1.2137572 | -2.8925681 |
| C | -5.1810534 | 0.7860364  | -2.7947688 |
| C | -6.2917332 | 1.0136517  | -1.9698731 |
| H | -6.3616506 | 0.5280012  | -0.9971933 |
| C | -7.3155931 | 1.8588604  | -2.3996351 |
| H | -8.1817022 | 2.0265779  | -1.7605384 |
| C | -7.2345944 | 2.4813199  | -3.6475627 |
| H | -8.0343843 | 3.1425143  | -3.9787267 |
| C | -6.1359223 | 2.2446610  | -4.4785600 |
| H | -6.0782240 | 2.7187738  | -5.4574405 |
| C | -5.1142040 | 1.3972362  | -4.0570118 |
| H | -4.2657545 | 1.1995555  | -4.7100406 |
| C | -4.3721121 | -1.2741497 | -0.8929873 |
| C | -4.7591473 | -2.5849283 | -1.2043199 |
| H | -4.6675363 | -2.9510458 | -2.2261000 |
| C | -5.2619643 | -3.4215306 | -0.2068926 |
| H | -5.5672350 | -4.4369296 | -0.4571523 |

|    |            |            |            |
|----|------------|------------|------------|
| C  | -5.3760586 | -2.9593264 | 1.1077601  |
| H  | -5.7733881 | -3.6143644 | 1.8824513  |
| C  | -4.9913461 | -1.6548060 | 1.4255076  |
| H  | -5.0904996 | -1.2876886 | 2.4462556  |
| C  | -4.4966398 | -0.8104437 | 0.4293705  |
| H  | -4.2374323 | 0.2218180  | 0.6659179  |
| Ga | 1.4822481  | 0.0509055  | -0.0980367 |
| P  | 1.7885651  | -2.1093451 | 2.2959706  |
| C  | 2.4983425  | -0.7762944 | 1.4783886  |
| P  | 3.7568555  | 0.1522297  | 2.1845218  |
| C  | 0.5112288  | -2.7750740 | 1.1831924  |
| C  | 0.8192377  | -2.8750878 | -0.1867291 |
| H  | 1.8295599  | -2.6547562 | -0.5335066 |
| C  | -0.1548861 | -3.2900281 | -1.0965034 |
| H  | 0.0869485  | -3.3591413 | -2.1557127 |
| C  | -1.4322136 | -3.6305844 | -0.6457577 |
| H  | -2.1959462 | -3.9379744 | -1.3579301 |
| C  | -1.7178383 | -3.6051186 | 0.7222127  |
| H  | -2.7044657 | -3.8980748 | 1.0765503  |
| C  | -0.7503463 | -3.1849060 | 1.6358404  |
| H  | -0.9878944 | -3.1525357 | 2.6973561  |
| C  | 0.9778305  | -1.6404970 | 3.8490186  |
| C  | 1.6224548  | -1.8035591 | 5.0840617  |
| H  | 2.5492748  | -2.3706671 | 5.1439337  |
| C  | 1.0756547  | -1.2473656 | 6.2415710  |
| H  | 1.5855819  | -1.3773341 | 7.1952307  |
| C  | -0.1236497 | -0.5362122 | 6.1790937  |
| H  | -0.5524549 | -0.1104104 | 7.0853601  |
| C  | -0.7733633 | -0.3739364 | 4.9518305  |
| H  | -1.7101934 | 0.1803322  | 4.8993182  |
| C  | -0.2225302 | -0.9097163 | 3.7903879  |
| H  | -0.7129457 | -0.7437662 | 2.8290370  |
| C  | 2.9096705  | -3.4925808 | 2.6194952  |
| C  | 4.0528765  | -3.6182015 | 1.8178971  |
| H  | 4.2696939  | -2.8545834 | 1.0727422  |
| C  | 4.9115452  | -4.7009478 | 1.9942555  |
| H  | 5.8056472  | -4.7884655 | 1.3787580  |
| C  | 4.6276235  | -5.6668566 | 2.9632546  |
| H  | 5.3022594  | -6.5103522 | 3.1052683  |
| C  | 3.4730463  | -5.5600785 | 3.7439823  |
| H  | 3.2436652  | -6.3221453 | 4.4877818  |
| C  | 2.6080381  | -4.4797933 | 3.5706447  |
| H  | 1.7030273  | -4.4090438 | 4.1729456  |
| C  | 3.2319471  | 1.2023757  | 3.5668473  |
| C  | 4.1436417  | 1.6648893  | 4.5299513  |
| H  | 5.1902985  | 1.3664216  | 4.4817148  |
| C  | 3.7047156  | 2.5024183  | 5.5557069  |
| H  | 4.4124301  | 2.8585169  | 6.3032879  |
| C  | 2.3603287  | 2.8787890  | 5.6265599  |
| H  | 2.0194495  | 3.5255046  | 6.4342967  |
| C  | 1.4537236  | 2.4214741  | 4.6667129  |
| H  | 0.4033315  | 2.7037173  | 4.7317505  |
| C  | 1.8875649  | 1.5884172  | 3.6372747  |
| H  | 1.1871266  | 1.2137572  | 2.8925681  |
| C  | 5.1810534  | -0.7860364 | 2.7947688  |
| C  | 6.2917332  | -1.0136517 | 1.9698731  |
| H  | 6.3616506  | -0.5280012 | 0.9971933  |
| C  | 7.3155931  | -1.8588604 | 2.3996351  |

|   |           |            |            |
|---|-----------|------------|------------|
| H | 8.1817022 | -2.0265779 | 1.7605384  |
| C | 7.2345944 | -2.4813199 | 3.6475627  |
| H | 8.0343843 | -3.1425143 | 3.9787267  |
| C | 6.1359223 | -2.2446610 | 4.4785600  |
| H | 6.0782240 | -2.7187738 | 5.4574405  |
| C | 5.1142040 | -1.3972362 | 4.0570118  |
| H | 4.2657545 | -1.1995555 | 4.7100406  |
| C | 4.3721121 | 1.2741497  | 0.8929873  |
| C | 4.7591473 | 2.5849283  | 1.2043199  |
| H | 4.6675363 | 2.9510458  | 2.2261000  |
| C | 5.2619643 | 3.4215306  | 0.2068926  |
| H | 5.5672350 | 4.4369296  | 0.4571523  |
| C | 5.3760586 | 2.9593264  | -1.1077601 |
| H | 5.7733881 | 3.6143644  | -1.8824513 |
| C | 4.9913461 | 1.6548060  | -1.4255076 |
| H | 5.0904996 | 1.2876886  | -2.4462556 |
| C | 4.4966398 | 0.8104437  | -0.4293705 |
| H | 4.2374323 | -0.2218180 | -0.6659179 |

SCF energy GEOOPT = -8073.093172308 H  
ZPE = 2856. kJ/mol  
FREEH energy = 3048.96 kJ/mol  
FREEH entropy = 1.68039 kJ/mol/K

\$vibrational spectrum

| # | mode | symmetry | wave number | IR intensity | selection rules |       |
|---|------|----------|-------------|--------------|-----------------|-------|
| # |      |          | cm**(-1)    | km/mol       | IR              | RAMAN |
|   | 1    |          | -0.00       | 0.00000      | -               | -     |
|   | 2    |          | -0.00       | 0.00000      | -               | -     |
|   | 3    |          | -0.00       | 0.00000      | -               | -     |
|   | 4    |          | -0.00       | 0.00000      | -               | -     |
|   | 5    |          | 0.00        | 0.00000      | -               | -     |
|   | 6    |          | 0.00        | 0.00000      | -               | -     |
|   | 7    | au       | 7.37        | 0.02986      | YES             | NO    |
|   | 8    | au       | 13.88       | 0.17751      | YES             | NO    |
|   | 9    | ag       | 15.81       | 0.00000      | NO              | YES   |
|   | 10   | au       | 19.09       | 0.07407      | YES             | NO    |
|   | 11   | au       | 25.56       | 0.03695      | YES             | NO    |
|   | 12   | ag       | 28.10       | 0.00000      | NO              | YES   |
|   | 13   | ag       | 31.72       | 0.00000      | NO              | YES   |
|   | 14   | au       | 36.54       | 0.02182      | YES             | NO    |
|   | 15   | ag       | 36.75       | 0.00000      | NO              | YES   |
|   | 16   | ag       | 39.54       | 0.00000      | NO              | YES   |
|   | 17   | au       | 41.99       | 0.03150      | YES             | NO    |
|   | 18   | ag       | 45.31       | 0.00000      | NO              | YES   |
|   | 19   | au       | 46.32       | 0.14900      | YES             | NO    |
|   | 20   | au       | 47.98       | 0.11387      | YES             | NO    |
|   | 21   | ag       | 48.54       | 0.00000      | NO              | YES   |
|   | 22   | ag       | 52.52       | 0.00000      | NO              | YES   |
|   | 23   | au       | 54.35       | 0.13317      | YES             | NO    |
|   | 24   | au       | 55.89       | 0.21810      | YES             | NO    |
|   | 25   | ag       | 56.46       | 0.00000      | NO              | YES   |
|   | 26   | ag       | 58.51       | 0.00000      | NO              | YES   |
|   | 27   | au       | 62.49       | 0.02468      | YES             | NO    |
|   | 28   | ag       | 63.36       | 0.00000      | NO              | YES   |
|   | 29   | ag       | 65.89       | 0.00000      | NO              | YES   |
|   | 30   | au       | 66.06       | 0.50459      | YES             | NO    |
|   | 31   | au       | 66.29       | 0.17128      | YES             | NO    |

|    |    |        |          |     |     |
|----|----|--------|----------|-----|-----|
| 32 | ag | 72.12  | 0.00000  | NO  | YES |
| 33 | au | 72.51  | 0.16091  | YES | NO  |
| 34 | ag | 75.74  | 0.00000  | NO  | YES |
| 35 | au | 78.55  | 0.63214  | YES | NO  |
| 36 | ag | 82.46  | 0.00000  | NO  | YES |
| 37 | au | 84.51  | 0.36180  | YES | NO  |
| 38 | ag | 88.60  | 0.00000  | NO  | YES |
| 39 | au | 90.37  | 0.05705  | YES | NO  |
| 40 | ag | 91.75  | 0.00000  | NO  | YES |
| 41 | au | 95.78  | 0.14154  | YES | NO  |
| 42 | au | 102.00 | 0.33960  | YES | NO  |
| 43 | ag | 105.66 | 0.00000  | NO  | YES |
| 44 | ag | 107.07 | 0.00000  | NO  | YES |
| 45 | au | 112.09 | 1.01142  | YES | NO  |
| 46 | ag | 121.16 | 0.00000  | NO  | YES |
| 47 | au | 125.36 | 0.35542  | YES | NO  |
| 48 | ag | 127.20 | 0.00000  | NO  | YES |
| 49 | au | 132.46 | 2.93771  | YES | NO  |
| 50 | ag | 147.46 | 0.00000  | NO  | YES |
| 51 | au | 150.04 | 8.50855  | YES | NO  |
| 52 | ag | 159.84 | 0.00000  | NO  | YES |
| 53 | ag | 190.24 | 0.00000  | NO  | YES |
| 54 | au | 190.24 | 0.68480  | YES | NO  |
| 55 | au | 196.53 | 5.94200  | YES | NO  |
| 56 | ag | 196.90 | 0.00000  | NO  | YES |
| 57 | au | 201.99 | 5.80308  | YES | NO  |
| 58 | ag | 202.44 | 0.00000  | NO  | YES |
| 59 | ag | 211.99 | 0.00000  | NO  | YES |
| 60 | au | 213.98 | 28.33492 | YES | NO  |
| 61 | au | 221.77 | 1.92819  | YES | NO  |
| 62 | ag | 222.13 | 0.00000  | NO  | YES |
| 63 | au | 229.64 | 0.50914  | YES | NO  |
| 64 | ag | 230.52 | 0.00000  | NO  | YES |
| 65 | ag | 236.80 | 0.00000  | NO  | YES |
| 66 | au | 237.07 | 5.54100  | YES | NO  |
| 67 | ag | 238.91 | 0.00000  | NO  | YES |
| 68 | au | 240.64 | 7.41471  | YES | NO  |
| 69 | ag | 246.52 | 0.00000  | NO  | YES |
| 70 | au | 246.53 | 7.41447  | YES | NO  |
| 71 | au | 254.25 | 0.73753  | YES | NO  |
| 72 | ag | 254.80 | 0.00000  | NO  | YES |
| 73 | ag | 258.30 | 0.00000  | NO  | YES |
| 74 | au | 258.49 | 0.78959  | YES | NO  |
| 75 | au | 272.75 | 0.84651  | YES | NO  |
| 76 | ag | 272.75 | 0.00000  | NO  | YES |
| 77 | ag | 276.82 | 0.00000  | NO  | YES |
| 78 | au | 277.01 | 3.73519  | YES | NO  |
| 79 | ag | 347.96 | 0.00000  | NO  | YES |
| 80 | au | 348.01 | 12.26368 | YES | NO  |
| 81 | ag | 382.21 | 0.00000  | NO  | YES |
| 82 | au | 382.42 | 25.18018 | YES | NO  |
| 83 | au | 384.76 | 8.76779  | YES | NO  |
| 84 | ag | 385.19 | 0.00000  | NO  | YES |
| 85 | ag | 391.66 | 0.00000  | NO  | YES |
| 86 | au | 392.11 | 1.18984  | YES | NO  |
| 87 | ag | 398.36 | 0.00000  | NO  | YES |
| 88 | au | 398.87 | 1.05162  | YES | NO  |
| 89 | au | 399.89 | 0.97980  | YES | NO  |

|     |    |        |           |     |     |
|-----|----|--------|-----------|-----|-----|
| 90  | ag | 400.23 | 0.00000   | NO  | YES |
| 91  | ag | 405.10 | 0.00000   | NO  | YES |
| 92  | au | 405.74 | 0.24385   | YES | NO  |
| 93  | au | 408.45 | 0.25086   | YES | NO  |
| 94  | ag | 409.25 | 0.00000   | NO  | YES |
| 95  | ag | 428.93 | 0.00000   | NO  | YES |
| 96  | au | 429.02 | 0.53613   | YES | NO  |
| 97  | ag | 433.02 | 0.00000   | NO  | YES |
| 98  | au | 433.34 | 14.97277  | YES | NO  |
| 99  | ag | 440.83 | 0.00000   | NO  | YES |
| 100 | au | 440.97 | 0.56773   | YES | NO  |
| 101 | ag | 450.94 | 0.00000   | NO  | YES |
| 102 | au | 451.27 | 3.17721   | YES | NO  |
| 103 | au | 470.27 | 1.61435   | YES | NO  |
| 104 | ag | 470.52 | 0.00000   | NO  | YES |
| 105 | ag | 494.00 | 0.00000   | NO  | YES |
| 106 | au | 495.85 | 157.24199 | YES | NO  |
| 107 | ag | 500.26 | 0.00000   | NO  | YES |
| 108 | au | 500.72 | 35.33910  | YES | NO  |
| 109 | au | 508.49 | 24.15875  | YES | NO  |
| 110 | ag | 509.15 | 0.00000   | NO  | YES |
| 111 | ag | 517.05 | 0.00000   | NO  | YES |
| 112 | au | 517.32 | 32.65251  | YES | NO  |
| 113 | ag | 524.38 | 0.00000   | NO  | YES |
| 114 | au | 524.91 | 248.31892 | YES | NO  |
| 115 | au | 561.68 | 19.36746  | YES | NO  |
| 116 | ag | 561.88 | 0.00000   | NO  | YES |
| 117 | au | 612.37 | 0.92289   | YES | NO  |
| 118 | ag | 612.44 | 0.00000   | NO  | YES |
| 119 | au | 613.35 | 0.09028   | YES | NO  |
| 120 | ag | 613.38 | 0.00000   | NO  | YES |
| 121 | ag | 613.74 | 0.00000   | NO  | YES |
| 122 | au | 613.86 | 0.08043   | YES | NO  |
| 123 | ag | 614.35 | 0.00000   | NO  | YES |
| 124 | au | 614.36 | 0.15856   | YES | NO  |
| 125 | au | 615.39 | 1.39189   | YES | NO  |
| 126 | ag | 615.54 | 0.00000   | NO  | YES |
| 127 | ag | 615.83 | 0.00000   | NO  | YES |
| 128 | au | 615.91 | 0.92267   | YES | NO  |
| 129 | au | 677.62 | 78.57675  | YES | NO  |
| 130 | ag | 678.21 | 0.00000   | NO  | YES |
| 131 | ag | 680.85 | 0.00000   | NO  | YES |
| 132 | au | 680.95 | 3.49786   | YES | NO  |
| 133 | ag | 690.17 | 0.00000   | NO  | YES |
| 134 | au | 690.54 | 165.12984 | YES | NO  |
| 135 | au | 691.93 | 32.43423  | YES | NO  |
| 136 | ag | 692.18 | 0.00000   | NO  | YES |
| 137 | au | 695.23 | 44.48541  | YES | NO  |
| 138 | ag | 695.51 | 0.00000   | NO  | YES |
| 139 | ag | 696.71 | 0.00000   | NO  | YES |
| 140 | au | 696.96 | 26.47631  | YES | NO  |
| 141 | au | 699.21 | 35.73700  | YES | NO  |
| 142 | ag | 699.24 | 0.00000   | NO  | YES |
| 143 | au | 702.23 | 4.52363   | YES | NO  |
| 144 | ag | 702.45 | 0.00000   | NO  | YES |
| 145 | ag | 708.81 | 0.00000   | NO  | YES |
| 146 | au | 708.90 | 1.37570   | YES | NO  |
| 147 | au | 711.08 | 6.56001   | YES | NO  |



|     |    |        |            |     |     |
|-----|----|--------|------------|-----|-----|
| 148 | ag | 711.16 | 0.00000    | NO  | YES |
| 149 | au | 716.55 | 30.82517   | YES | NO  |
| 150 | ag | 716.59 | 0.00000    | NO  | YES |
| 151 | ag | 719.48 | 0.00000    | NO  | YES |
| 152 | au | 719.59 | 119.72412  | YES | NO  |
| 153 | ag | 734.88 | 0.00000    | NO  | YES |
| 154 | au | 735.18 | 140.83170  | YES | NO  |
| 155 | ag | 737.44 | 0.00000    | NO  | YES |
| 156 | au | 737.73 | 86.89234   | YES | NO  |
| 157 | au | 740.39 | 20.51211   | YES | NO  |
| 158 | ag | 740.50 | 0.00000    | NO  | YES |
| 159 | au | 742.50 | 93.81724   | YES | NO  |
| 160 | ag | 742.97 | 0.00000    | NO  | YES |
| 161 | au | 744.56 | 12.00074   | YES | NO  |
| 162 | ag | 744.88 | 0.00000    | NO  | YES |
| 163 | ag | 746.60 | 0.00000    | NO  | YES |
| 164 | au | 746.88 | 56.69228   | YES | NO  |
| 165 | au | 786.01 | 1132.01457 | YES | NO  |
| 166 | ag | 797.31 | 0.00000    | NO  | YES |
| 167 | ag | 833.18 | 0.00000    | NO  | YES |
| 168 | au | 833.85 | 0.70713    | YES | NO  |
| 169 | au | 836.54 | 2.64283    | YES | NO  |
| 170 | ag | 837.24 | 0.00000    | NO  | YES |
| 171 | ag | 841.08 | 0.00000    | NO  | YES |
| 172 | au | 841.52 | 2.09289    | YES | NO  |
| 173 | au | 842.26 | 4.57313    | YES | NO  |
| 174 | ag | 842.69 | 0.00000    | NO  | YES |
| 175 | au | 846.43 | 2.96906    | YES | NO  |
| 176 | ag | 846.73 | 0.00000    | NO  | YES |
| 177 | au | 851.29 | 3.39281    | YES | NO  |
| 178 | ag | 851.50 | 0.00000    | NO  | YES |
| 179 | au | 911.35 | 2.00008    | YES | NO  |
| 180 | ag | 911.55 | 0.00000    | NO  | YES |
| 181 | au | 914.01 | 0.72692    | YES | NO  |
| 182 | ag | 914.07 | 0.00000    | NO  | YES |
| 183 | au | 921.93 | 1.76788    | YES | NO  |
| 184 | ag | 921.95 | 0.00000    | NO  | YES |
| 185 | au | 923.19 | 3.43366    | YES | NO  |
| 186 | ag | 923.24 | 0.00000    | NO  | YES |
| 187 | au | 925.43 | 1.46503    | YES | NO  |
| 188 | ag | 925.47 | 0.00000    | NO  | YES |
| 189 | ag | 933.20 | 0.00000    | NO  | YES |
| 190 | au | 933.28 | 0.42337    | YES | NO  |
| 191 | au | 960.59 | 1.90273    | YES | NO  |
| 192 | ag | 960.77 | 0.00000    | NO  | YES |
| 193 | ag | 964.85 | 0.00000    | NO  | YES |
| 194 | au | 965.18 | 0.17834    | YES | NO  |
| 195 | ag | 967.66 | 0.00000    | NO  | YES |
| 196 | au | 967.77 | 1.49859    | YES | NO  |
| 197 | au | 968.47 | 0.51713    | YES | NO  |
| 198 | ag | 968.65 | 0.00000    | NO  | YES |
| 199 | au | 970.22 | 1.72060    | YES | NO  |
| 200 | ag | 970.26 | 0.00000    | NO  | YES |
| 201 | au | 974.87 | 0.24379    | YES | NO  |
| 202 | ag | 975.01 | 0.00000    | NO  | YES |
| 203 | au | 984.24 | 1.64548    | YES | NO  |
| 204 | ag | 984.24 | 0.00000    | NO  | YES |
| 205 | au | 989.38 | 0.19098    | YES | NO  |

|     |    |         |           |     |     |
|-----|----|---------|-----------|-----|-----|
| 206 | ag | 989.38  | 0.00000   | NO  | YES |
| 207 | ag | 990.98  | 0.00000   | NO  | YES |
| 208 | au | 990.98  | 0.26527   | YES | NO  |
| 209 | au | 992.20  | 5.29360   | YES | NO  |
| 210 | ag | 992.23  | 0.00000   | NO  | YES |
| 211 | au | 992.53  | 0.93139   | YES | NO  |
| 212 | ag | 992.54  | 0.00000   | NO  | YES |
| 213 | ag | 993.07  | 0.00000   | NO  | YES |
| 214 | au | 993.09  | 2.21928   | YES | NO  |
| 215 | au | 996.64  | 9.22193   | YES | NO  |
| 216 | ag | 996.75  | 0.00000   | NO  | YES |
| 217 | ag | 997.13  | 0.00000   | NO  | YES |
| 218 | au | 997.40  | 15.05472  | YES | NO  |
| 219 | ag | 997.50  | 0.00000   | NO  | YES |
| 220 | au | 997.68  | 31.58797  | YES | NO  |
| 221 | au | 998.48  | 3.70501   | YES | NO  |
| 222 | ag | 998.90  | 0.00000   | NO  | YES |
| 223 | au | 999.21  | 1.86634   | YES | NO  |
| 224 | ag | 999.26  | 0.00000   | NO  | YES |
| 225 | ag | 1001.82 | 0.00000   | NO  | YES |
| 226 | au | 1001.84 | 1.58252   | YES | NO  |
| 227 | ag | 1024.24 | 0.00000   | NO  | YES |
| 228 | au | 1024.41 | 16.60894  | YES | NO  |
| 229 | ag | 1025.51 | 0.00000   | NO  | YES |
| 230 | au | 1025.59 | 2.79385   | YES | NO  |
| 231 | ag | 1026.02 | 0.00000   | NO  | YES |
| 232 | au | 1026.25 | 1.38329   | YES | NO  |
| 233 | au | 1026.47 | 6.85367   | YES | NO  |
| 234 | ag | 1026.74 | 0.00000   | NO  | YES |
| 235 | au | 1027.21 | 1.74360   | YES | NO  |
| 236 | ag | 1027.23 | 0.00000   | NO  | YES |
| 237 | au | 1027.99 | 1.12554   | YES | NO  |
| 238 | ag | 1028.01 | 0.00000   | NO  | YES |
| 239 | ag | 1056.90 | 0.00000   | NO  | YES |
| 240 | au | 1058.35 | 465.40875 | YES | NO  |
| 241 | au | 1073.82 | 7.33155   | YES | NO  |
| 242 | ag | 1073.95 | 0.00000   | NO  | YES |
| 243 | ag | 1075.77 | 0.00000   | NO  | YES |
| 244 | au | 1075.90 | 1.89249   | YES | NO  |
| 245 | ag | 1077.25 | 0.00000   | NO  | YES |
| 246 | au | 1077.33 | 7.51349   | YES | NO  |
| 247 | au | 1078.61 | 4.06695   | YES | NO  |
| 248 | ag | 1078.70 | 0.00000   | NO  | YES |
| 249 | au | 1081.43 | 0.18900   | YES | NO  |
| 250 | ag | 1081.47 | 0.00000   | NO  | YES |
| 251 | au | 1082.69 | 9.28144   | YES | NO  |
| 252 | ag | 1082.72 | 0.00000   | NO  | YES |
| 253 | au | 1092.55 | 108.49310 | YES | NO  |
| 254 | ag | 1092.56 | 0.00000   | NO  | YES |
| 255 | ag | 1093.51 | 0.00000   | NO  | YES |
| 256 | au | 1093.68 | 11.78013  | YES | NO  |
| 257 | au | 1094.43 | 157.01499 | YES | NO  |
| 258 | ag | 1094.49 | 0.00000   | NO  | YES |
| 259 | ag | 1094.81 | 0.00000   | NO  | YES |
| 260 | au | 1094.82 | 141.42111 | YES | NO  |
| 261 | ag | 1097.59 | 0.00000   | NO  | YES |
| 262 | au | 1097.67 | 135.20653 | YES | NO  |
| 263 | ag | 1097.89 | 0.00000   | NO  | YES |

|     |    |         |           |     |     |
|-----|----|---------|-----------|-----|-----|
| 264 | au | 1098.02 | 124.65275 | YES | NO  |
| 265 | ag | 1153.43 | 0.00000   | NO  | YES |
| 266 | au | 1153.45 | 0.79713   | YES | NO  |
| 267 | au | 1158.17 | 0.43994   | YES | NO  |
| 268 | ag | 1158.18 | 0.00000   | NO  | YES |
| 269 | ag | 1158.94 | 0.00000   | NO  | YES |
| 270 | au | 1158.96 | 0.43180   | YES | NO  |
| 271 | au | 1159.13 | 1.42348   | YES | NO  |
| 272 | ag | 1159.20 | 0.00000   | NO  | YES |
| 273 | au | 1159.46 | 1.93736   | YES | NO  |
| 274 | ag | 1159.49 | 0.00000   | NO  | YES |
| 275 | ag | 1160.74 | 0.00000   | NO  | YES |
| 276 | au | 1160.76 | 1.32437   | YES | NO  |
| 277 | au | 1173.21 | 1.92029   | YES | NO  |
| 278 | ag | 1173.36 | 0.00000   | NO  | YES |
| 279 | au | 1173.94 | 2.81223   | YES | NO  |
| 280 | ag | 1174.33 | 0.00000   | NO  | YES |
| 281 | ag | 1174.84 | 0.00000   | NO  | YES |
| 282 | au | 1175.40 | 3.58514   | YES | NO  |
| 283 | ag | 1175.84 | 0.00000   | NO  | YES |
| 284 | au | 1176.03 | 2.92558   | YES | NO  |
| 285 | ag | 1179.15 | 0.00000   | NO  | YES |
| 286 | au | 1179.18 | 2.65071   | YES | NO  |
| 287 | au | 1182.60 | 4.60529   | YES | NO  |
| 288 | ag | 1182.77 | 0.00000   | NO  | YES |
| 289 | au | 1289.87 | 2.24729   | YES | NO  |
| 290 | ag | 1289.88 | 0.00000   | NO  | YES |
| 291 | ag | 1295.91 | 0.00000   | NO  | YES |
| 292 | au | 1295.92 | 6.32165   | YES | NO  |
| 293 | au | 1296.55 | 11.90485  | YES | NO  |
| 294 | ag | 1296.57 | 0.00000   | NO  | YES |
| 295 | ag | 1298.63 | 0.00000   | NO  | YES |
| 296 | au | 1298.67 | 10.79280  | YES | NO  |
| 297 | ag | 1304.51 | 0.00000   | NO  | YES |
| 298 | au | 1304.55 | 2.08441   | YES | NO  |
| 299 | au | 1306.12 | 7.74160   | YES | NO  |
| 300 | ag | 1306.15 | 0.00000   | NO  | YES |
| 301 | au | 1335.81 | 0.86671   | YES | NO  |
| 302 | ag | 1335.87 | 0.00000   | NO  | YES |
| 303 | au | 1337.25 | 2.51852   | YES | NO  |
| 304 | ag | 1337.27 | 0.00000   | NO  | YES |
| 305 | ag | 1339.32 | 0.00000   | NO  | YES |
| 306 | au | 1339.39 | 1.17049   | YES | NO  |
| 307 | au | 1339.47 | 0.20897   | YES | NO  |
| 308 | ag | 1339.49 | 0.00000   | NO  | YES |
| 309 | ag | 1340.74 | 0.00000   | NO  | YES |
| 310 | au | 1340.76 | 0.93821   | YES | NO  |
| 311 | ag | 1341.99 | 0.00000   | NO  | YES |
| 312 | au | 1342.00 | 0.41525   | YES | NO  |
| 313 | au | 1423.82 | 12.61626  | YES | NO  |
| 314 | ag | 1423.92 | 0.00000   | NO  | YES |
| 315 | ag | 1428.40 | 0.00000   | NO  | YES |
| 316 | au | 1428.40 | 28.61287  | YES | NO  |
| 317 | ag | 1428.86 | 0.00000   | NO  | YES |
| 318 | au | 1429.02 | 55.68076  | YES | NO  |
| 319 | ag | 1429.41 | 0.00000   | NO  | YES |
| 320 | au | 1429.44 | 9.25970   | YES | NO  |
| 321 | ag | 1433.71 | 0.00000   | NO  | YES |

|     |    |         |          |     |     |
|-----|----|---------|----------|-----|-----|
| 322 | au | 1433.72 | 12.93917 | YES | NO  |
| 323 | au | 1434.07 | 60.48918 | YES | NO  |
| 324 | ag | 1434.17 | 0.00000  | NO  | YES |
| 325 | ag | 1468.08 | 0.00000  | NO  | YES |
| 326 | au | 1468.14 | 16.21380 | YES | NO  |
| 327 | au | 1469.98 | 13.79948 | YES | NO  |
| 328 | ag | 1470.15 | 0.00000  | NO  | YES |
| 329 | ag | 1470.71 | 0.00000  | NO  | YES |
| 330 | au | 1470.86 | 10.97678 | YES | NO  |
| 331 | ag | 1471.24 | 0.00000  | NO  | YES |
| 332 | au | 1471.27 | 3.81969  | YES | NO  |
| 333 | ag | 1474.21 | 0.00000  | NO  | YES |
| 334 | au | 1474.21 | 18.23805 | YES | NO  |
| 335 | au | 1475.07 | 13.93256 | YES | NO  |
| 336 | ag | 1475.10 | 0.00000  | NO  | YES |
| 337 | au | 1563.92 | 1.68873  | YES | NO  |
| 338 | ag | 1564.04 | 0.00000  | NO  | YES |
| 339 | au | 1566.57 | 0.71855  | YES | NO  |
| 340 | ag | 1566.60 | 0.00000  | NO  | YES |
| 341 | ag | 1568.49 | 0.00000  | NO  | YES |
| 342 | au | 1568.49 | 0.62316  | YES | NO  |
| 343 | ag | 1569.27 | 0.00000  | NO  | YES |
| 344 | au | 1569.27 | 0.74775  | YES | NO  |
| 345 | au | 1571.16 | 1.88663  | YES | NO  |
| 346 | ag | 1571.21 | 0.00000  | NO  | YES |
| 347 | au | 1572.03 | 3.85094  | YES | NO  |
| 348 | ag | 1572.12 | 0.00000  | NO  | YES |
| 349 | au | 1579.58 | 3.94459  | YES | NO  |
| 350 | ag | 1579.64 | 0.00000  | NO  | YES |
| 351 | ag | 1580.75 | 0.00000  | NO  | YES |
| 352 | au | 1580.76 | 1.41647  | YES | NO  |
| 353 | ag | 1582.67 | 0.00000  | NO  | YES |
| 354 | au | 1582.67 | 0.81481  | YES | NO  |
| 355 | au | 1583.64 | 3.91816  | YES | NO  |
| 356 | ag | 1583.65 | 0.00000  | NO  | YES |
| 357 | au | 1584.66 | 3.40910  | YES | NO  |
| 358 | ag | 1584.67 | 0.00000  | NO  | YES |
| 359 | au | 1585.20 | 8.15318  | YES | NO  |
| 360 | ag | 1585.21 | 0.00000  | NO  | YES |
| 361 | au | 3064.98 | 10.28913 | YES | NO  |
| 362 | ag | 3065.02 | 0.00000  | NO  | YES |
| 363 | ag | 3091.19 | 0.00000  | NO  | YES |
| 364 | au | 3091.26 | 4.74259  | YES | NO  |
| 365 | au | 3095.62 | 9.80249  | YES | NO  |
| 366 | ag | 3095.68 | 0.00000  | NO  | YES |
| 367 | au | 3104.51 | 0.56605  | YES | NO  |
| 368 | ag | 3104.52 | 0.00000  | NO  | YES |
| 369 | ag | 3107.62 | 0.00000  | NO  | YES |
| 370 | au | 3107.62 | 1.20586  | YES | NO  |
| 371 | au | 3107.94 | 0.13931  | YES | NO  |
| 372 | ag | 3107.94 | 0.00000  | NO  | YES |
| 373 | au | 3109.43 | 2.32520  | YES | NO  |
| 374 | ag | 3109.44 | 0.00000  | NO  | YES |
| 375 | au | 3110.03 | 1.38778  | YES | NO  |
| 376 | ag | 3110.04 | 0.00000  | NO  | YES |
| 377 | au | 3110.91 | 1.19137  | YES | NO  |
| 378 | ag | 3110.92 | 0.00000  | NO  | YES |
| 379 | ag | 3111.97 | 0.00000  | NO  | YES |

|     |    |         |          |     |     |
|-----|----|---------|----------|-----|-----|
| 380 | au | 3111.97 | 0.91369  | YES | NO  |
| 381 | au | 3112.26 | 0.24167  | YES | NO  |
| 382 | ag | 3112.26 | 0.00000  | NO  | YES |
| 383 | au | 3116.14 | 2.96739  | YES | NO  |
| 384 | ag | 3116.16 | 0.00000  | NO  | YES |
| 385 | ag | 3116.62 | 0.00000  | NO  | YES |
| 386 | au | 3116.62 | 1.65501  | YES | NO  |
| 387 | ag | 3117.01 | 0.00000  | NO  | YES |
| 388 | au | 3117.02 | 1.82119  | YES | NO  |
| 389 | au | 3119.02 | 0.35323  | YES | NO  |
| 390 | ag | 3119.03 | 0.00000  | NO  | YES |
| 391 | ag | 3119.26 | 0.00000  | NO  | YES |
| 392 | au | 3119.26 | 1.86301  | YES | NO  |
| 393 | au | 3119.65 | 0.06302  | YES | NO  |
| 394 | ag | 3119.66 | 0.00000  | NO  | YES |
| 395 | ag | 3123.23 | 0.00000  | NO  | YES |
| 396 | au | 3123.23 | 11.00098 | YES | NO  |
| 397 | au | 3124.41 | 0.82282  | YES | NO  |
| 398 | ag | 3124.41 | 0.00000  | NO  | YES |
| 399 | ag | 3125.26 | 0.00000  | NO  | YES |
| 400 | au | 3125.26 | 4.46880  | YES | NO  |
| 401 | ag | 3125.83 | 0.00000  | NO  | YES |
| 402 | au | 3125.84 | 11.06381 | YES | NO  |
| 403 | au | 3126.53 | 3.90363  | YES | NO  |
| 404 | ag | 3126.53 | 0.00000  | NO  | YES |
| 405 | ag | 3127.39 | 0.00000  | NO  | YES |
| 406 | au | 3127.39 | 9.10859  | YES | NO  |
| 407 | ag | 3132.22 | 0.00000  | NO  | YES |
| 408 | au | 3132.23 | 7.82311  | YES | NO  |
| 409 | ag | 3133.18 | 0.00000  | NO  | YES |
| 410 | au | 3133.18 | 7.65097  | YES | NO  |
| 411 | ag | 3133.32 | 0.00000  | NO  | YES |
| 412 | au | 3133.32 | 6.09943  | YES | NO  |
| 413 | au | 3134.41 | 10.68048 | YES | NO  |
| 414 | ag | 3134.41 | 0.00000  | NO  | YES |
| 415 | ag | 3134.92 | 0.00000  | NO  | YES |
| 416 | au | 3134.92 | 2.13444  | YES | NO  |
| 417 | au | 3135.09 | 18.96669 | YES | NO  |
| 418 | ag | 3135.11 | 0.00000  | NO  | YES |
| 419 | ag | 3139.62 | 0.00000  | NO  | YES |
| 420 | au | 3139.62 | 7.02037  | YES | NO  |

§end

COSMO energy + OC correction = -8073.2358004620 H

Method: (RI-)BP86(D3BJ)/def2-SVP

Symmetry: ci

Cartesian coordinates in Ångström:

|    |            |            |            |
|----|------------|------------|------------|
| Ga | -1.4662960 | -0.0548290 | 0.1105240  |
| P  | -1.7736621 | 2.1123061  | -2.2970011 |
| C  | -2.4938638 | 0.7795676  | -1.4504037 |
| P  | -3.7691014 | -0.1431588 | -2.1758734 |
| C  | -0.4941656 | 2.7937583  | -1.1777452 |
| C  | -0.8065774 | 2.8889163  | 0.1990061  |

|   |            |            |            |
|---|------------|------------|------------|
| H | -1.8257306 | 2.6621430  | 0.5479412  |
| C | 0.1743014  | 3.3008875  | 1.1153801  |
| H | -0.0699071 | 3.3686014  | 2.1848101  |
| C | 1.4603064  | 3.6398325  | 0.6635462  |
| H | 2.2329350  | 3.9436812  | 1.3836665  |
| C | 1.7475055  | 3.6205795  | -0.7123038 |
| H | 2.7452608  | 3.9136529  | -1.0675344 |
| C | 0.7732635  | 3.2071667  | -1.6341198 |
| H | 1.0128329  | 3.1807206  | -2.7061398 |
| C | -0.9540295 | 1.6092275  | -3.8494782 |
| C | -1.6134828 | 1.7236912  | -5.0911040 |
| H | -2.5571105 | 2.2810787  | -5.1658227 |
| C | -1.0645866 | 1.1320615  | -6.2394210 |
| H | -1.5882998 | 1.2242591  | -7.2020273 |
| C | 0.1501319  | 0.4333777  | -6.1612585 |
| H | 0.5819176  | -0.0218369 | -7.0646740 |
| C | 0.8121317  | 0.3174583  | -4.9266852 |
| H | 1.7636683  | -0.2311633 | -4.8607008 |
| C | 0.2597331  | 0.8878031  | -3.7725346 |
| H | 0.7599918  | 0.7506497  | -2.8000842 |
| C | -2.9161361 | 3.4866394  | -2.6484756 |
| C | -4.0547201 | 3.6182988  | -1.8280551 |
| H | -4.2459704 | 2.8698622  | -1.0459231 |
| C | -4.9418743 | 4.6829666  | -2.0319355 |
| H | -5.8367330 | 4.7768866  | -1.4000931 |
| C | -4.6898318 | 5.6230327  | -3.0457051 |
| H | -5.3899868 | 6.4555197  | -3.2096868 |
| C | -3.5379129 | 5.5107297  | -3.8430840 |
| H | -3.3319330 | 6.2581202  | -4.6234049 |
| C | -2.6425263 | 4.4489951  | -3.6429682 |
| H | -1.7349048 | 4.3754959  | -4.2599418 |
| C | -3.2345407 | -1.1719081 | -3.5862277 |
| C | -4.1405220 | -1.6043487 | -4.5785134 |
| H | -5.1973976 | -1.3020979 | -4.5363433 |
| C | -3.6853557 | -2.4185622 | -5.6272314 |
| H | -4.3896457 | -2.7542759 | -6.4025868 |
| C | -2.3341340 | -2.8004335 | -5.6889590 |
| H | -1.9804168 | -3.4316075 | -6.5176103 |
| C | -1.4351736 | -2.3735498 | -4.6967364 |
| H | -0.3752623 | -2.6623776 | -4.7534196 |
| C | -1.8834015 | -1.5640641 | -3.6444394 |
| H | -1.1882258 | -1.2105289 | -2.8697364 |
| C | -5.2038602 | 0.8149610  | -2.7679445 |
| C | -6.3101315 | 1.0369014  | -1.9229656 |
| H | -6.3750128 | 0.5315759  | -0.9482041 |
| C | -7.3368793 | 1.9017723  | -2.3321620 |
| H | -8.2041269 | 2.0670128  | -1.6760217 |
| C | -7.2621845 | 2.5478760  | -3.5774230 |
| H | -8.0677323 | 3.2271433  | -3.8929405 |
| C | -6.1665674 | 2.3169404  | -4.4267400 |
| H | -6.1121245 | 2.8135883  | -5.4063372 |
| C | -5.1409303 | 1.4509996  | -4.0263305 |
| H | -4.2896167 | 1.2610831  | -4.6945327 |
| C | -4.3815752 | -1.2943565 | -0.8936642 |
| C | -4.7766018 | -2.6036454 | -1.2333973 |
| H | -4.6946630 | -2.9511147 | -2.2737447 |
| C | -5.2749412 | -3.4637427 | -0.2423166 |
| H | -5.5886685 | -4.4827834 | -0.5127641 |

|    |            |            |            |
|----|------------|------------|------------|
| C  | -5.3753635 | -3.0256102 | 1.0901295  |
| H  | -5.7706055 | -3.7021807 | 1.8624328  |
| C  | -4.9812668 | -1.7217637 | 1.4334310  |
| H  | -5.0695364 | -1.3730873 | 2.4728541  |
| C  | -4.4915100 | -0.8524009 | 0.4449959  |
| H  | -4.2232592 | 0.1836286  | 0.7023985  |
| Ga | 1.4662960  | 0.0548290  | -0.1105240 |
| P  | 1.7736621  | -2.1123061 | 2.2970011  |
| C  | 2.4938638  | -0.7795676 | 1.4504037  |
| P  | 3.7691014  | 0.1431588  | 2.1758734  |
| C  | 0.4941656  | -2.7937583 | 1.1777452  |
| C  | 0.8065774  | -2.8889163 | -0.1990061 |
| H  | 1.8257306  | -2.6621430 | -0.5479412 |
| C  | -0.1743014 | -3.3008875 | -1.1153801 |
| H  | 0.0699071  | -3.3686014 | -2.1848101 |
| C  | -1.4603064 | -3.6398325 | -0.6635462 |
| H  | -2.2329350 | -3.9436812 | -1.3836665 |
| C  | -1.7475055 | -3.6205795 | 0.7123038  |
| H  | -2.7452608 | -3.9136529 | 1.0675344  |
| C  | -0.7732635 | -3.2071667 | 1.6341198  |
| H  | -1.0128329 | -3.1807206 | 2.7061398  |
| C  | 0.9540295  | -1.6092275 | 3.8494782  |
| C  | 1.6134828  | -1.7236912 | 5.0911040  |
| H  | 2.5571105  | -2.2810787 | 5.1658227  |
| C  | 1.0645866  | -1.1320615 | 6.2394210  |
| H  | 1.5882998  | -1.2242591 | 7.2020273  |
| C  | -0.1501319 | -0.4333777 | 6.1612585  |
| H  | -0.5819176 | 0.0218369  | 7.0646740  |
| C  | -0.8121317 | -0.3174583 | 4.9266852  |
| H  | -1.7636683 | 0.2311633  | 4.8607008  |
| C  | -0.2597331 | -0.8878031 | 3.7725346  |
| H  | -0.7599918 | -0.7506497 | 2.8000842  |
| C  | 2.9161361  | -3.4866394 | 2.6484756  |
| C  | 4.0547201  | -3.6182988 | 1.8280551  |
| H  | 4.2459704  | -2.8698622 | 1.0459231  |
| C  | 4.9418743  | -4.6829666 | 2.0319355  |
| H  | 5.8367330  | -4.7768866 | 1.4000931  |
| C  | 4.6898318  | -5.6230327 | 3.0457051  |
| H  | 5.3899868  | -6.4555197 | 3.2096868  |
| C  | 3.5379129  | -5.5107297 | 3.8430840  |
| H  | 3.3319330  | -6.2581202 | 4.6234049  |
| C  | 2.6425263  | -4.4489951 | 3.6429682  |
| H  | 1.7349048  | -4.3754959 | 4.2599418  |
| C  | 3.2345407  | 1.1719081  | 3.5862277  |
| C  | 4.1405220  | 1.6043487  | 4.5785134  |
| H  | 5.1973976  | 1.3020979  | 4.5363433  |
| C  | 3.6853557  | 2.4185622  | 5.6272314  |
| H  | 4.3896457  | 2.7542759  | 6.4025868  |
| C  | 2.3341340  | 2.8004335  | 5.6889590  |
| H  | 1.9804168  | 3.4316075  | 6.5176103  |
| C  | 1.4351736  | 2.3735498  | 4.6967364  |
| H  | 0.3752623  | 2.6623776  | 4.7534196  |
| C  | 1.8834015  | 1.5640641  | 3.6444394  |
| H  | 1.1882258  | 1.2105289  | 2.8697364  |
| C  | 5.2038602  | -0.8149610 | 2.7679445  |
| C  | 6.3101315  | -1.0369014 | 1.9229656  |
| H  | 6.3750128  | -0.5315759 | 0.9482041  |
| C  | 7.3368793  | -1.9017723 | 2.3321620  |

|   |           |            |            |
|---|-----------|------------|------------|
| H | 8.2041269 | -2.0670128 | 1.6760217  |
| C | 7.2621845 | -2.5478760 | 3.5774230  |
| H | 8.0677323 | -3.2271433 | 3.8929405  |
| C | 6.1665674 | -2.3169404 | 4.4267400  |
| H | 6.1121245 | -2.8135883 | 5.4063372  |
| C | 5.1409303 | -1.4509996 | 4.0263305  |
| H | 4.2896167 | -1.2610831 | 4.6945327  |
| C | 4.3815752 | 1.2943565  | 0.8936642  |
| C | 4.7766018 | 2.6036454  | 1.2333973  |
| H | 4.6946630 | 2.9511147  | 2.2737447  |
| C | 5.2749412 | 3.4637427  | 0.2423166  |
| H | 5.5886685 | 4.4827834  | 0.5127641  |
| C | 5.3753635 | 3.0256102  | -1.0901295 |
| H | 5.7706055 | 3.7021807  | -1.8624328 |
| C | 4.9812668 | 1.7217637  | -1.4334310 |
| H | 5.0695364 | 1.3730873  | -2.4728541 |
| C | 4.4915100 | 0.8524009  | -0.4449959 |
| H | 4.2232592 | -0.1836286 | -0.7023985 |

SCF energy GEOOPT = -8069.059771435 H  
 ZPE = 2857. kJ/mol  
 FREEH energy = 3049.39 kJ/mol  
 FREEH entropy = 1.66775 kJ/mol/K

\$vibrational spectrum

| # | mode | symmetry | wave number | IR intensity | selection rules |       |
|---|------|----------|-------------|--------------|-----------------|-------|
| # |      |          | cm**(-1)    | km/mol       | IR              | RAMAN |
|   | 1    |          | -0.00       | 0.00000      | -               | -     |
|   | 2    |          | 0.00        | 0.00000      | -               | -     |
|   | 3    |          | 0.00        | 0.00000      | -               | -     |
|   | 4    |          | 0.00        | 0.00000      | -               | -     |
|   | 5    |          | 0.00        | 0.00000      | -               | -     |
|   | 6    |          | 0.00        | 0.00000      | -               | -     |
|   | 7    | au       | 9.14        | 0.05057      | YES             | NO    |
|   | 8    | au       | 15.06       | 0.16389      | YES             | NO    |
|   | 9    | ag       | 17.65       | 0.00000      | NO              | YES   |
|   | 10   | au       | 19.17       | 0.08858      | YES             | NO    |
|   | 11   | au       | 26.57       | 0.03960      | YES             | NO    |
|   | 12   | ag       | 28.93       | 0.00000      | NO              | YES   |
|   | 13   | ag       | 32.52       | 0.00000      | NO              | YES   |
|   | 14   | ag       | 37.40       | 0.00000      | NO              | YES   |
|   | 15   | au       | 37.80       | 0.02146      | YES             | NO    |
|   | 16   | ag       | 40.61       | 0.00000      | NO              | YES   |
|   | 17   | au       | 42.99       | 0.06456      | YES             | NO    |
|   | 18   | ag       | 45.33       | 0.00000      | NO              | YES   |
|   | 19   | au       | 46.60       | 0.12755      | YES             | NO    |
|   | 20   | au       | 48.78       | 0.16786      | YES             | NO    |
|   | 21   | ag       | 48.87       | 0.00000      | NO              | YES   |
|   | 22   | ag       | 53.30       | 0.00000      | NO              | YES   |
|   | 23   | au       | 54.32       | 0.15813      | YES             | NO    |
|   | 24   | au       | 56.58       | 0.31808      | YES             | NO    |
|   | 25   | ag       | 57.50       | 0.00000      | NO              | YES   |
|   | 26   | ag       | 59.53       | 0.00000      | NO              | YES   |
|   | 27   | ag       | 64.27       | 0.00000      | NO              | YES   |
|   | 28   | au       | 65.10       | 0.03682      | YES             | NO    |
|   | 29   | au       | 66.79       | 0.72460      | YES             | NO    |
|   | 30   | ag       | 67.61       | 0.00000      | NO              | YES   |
|   | 31   | au       | 67.84       | 0.07748      | YES             | NO    |



|    |    |        |          |     |     |
|----|----|--------|----------|-----|-----|
| 32 | ag | 75.35  | 0.00000  | NO  | YES |
| 33 | au | 75.97  | 0.27222  | YES | NO  |
| 34 | ag | 79.21  | 0.00000  | NO  | YES |
| 35 | au | 79.70  | 0.48515  | YES | NO  |
| 36 | ag | 86.11  | 0.00000  | NO  | YES |
| 37 | au | 88.98  | 0.35763  | YES | NO  |
| 38 | ag | 90.97  | 0.00000  | NO  | YES |
| 39 | au | 91.65  | 0.06309  | YES | NO  |
| 40 | ag | 93.89  | 0.00000  | NO  | YES |
| 41 | au | 97.76  | 0.09526  | YES | NO  |
| 42 | ag | 107.28 | 0.00000  | NO  | YES |
| 43 | au | 108.84 | 0.60799  | YES | NO  |
| 44 | ag | 113.28 | 0.00000  | NO  | YES |
| 45 | au | 115.60 | 0.86768  | YES | NO  |
| 46 | ag | 125.68 | 0.00000  | NO  | YES |
| 47 | au | 127.30 | 0.46590  | YES | NO  |
| 48 | ag | 129.40 | 0.00000  | NO  | YES |
| 49 | au | 135.88 | 2.25796  | YES | NO  |
| 50 | ag | 149.85 | 0.00000  | NO  | YES |
| 51 | au | 151.86 | 9.23687  | YES | NO  |
| 52 | ag | 162.48 | 0.00000  | NO  | YES |
| 53 | ag | 191.68 | 0.00000  | NO  | YES |
| 54 | au | 191.73 | 1.09348  | YES | NO  |
| 55 | au | 197.45 | 6.24895  | YES | NO  |
| 56 | ag | 198.57 | 0.00000  | NO  | YES |
| 57 | ag | 203.38 | 0.00000  | NO  | YES |
| 58 | au | 204.18 | 7.77219  | YES | NO  |
| 59 | ag | 213.25 | 0.00000  | NO  | YES |
| 60 | au | 214.47 | 25.05752 | YES | NO  |
| 61 | au | 222.27 | 2.25714  | YES | NO  |
| 62 | ag | 222.61 | 0.00000  | NO  | YES |
| 63 | au | 230.08 | 0.35211  | YES | NO  |
| 64 | ag | 231.18 | 0.00000  | NO  | YES |
| 65 | ag | 237.47 | 0.00000  | NO  | YES |
| 66 | au | 237.80 | 7.08382  | YES | NO  |
| 67 | ag | 239.63 | 0.00000  | NO  | YES |
| 68 | au | 241.09 | 5.27522  | YES | NO  |
| 69 | ag | 246.17 | 0.00000  | NO  | YES |
| 70 | au | 246.18 | 8.17621  | YES | NO  |
| 71 | au | 254.49 | 1.69811  | YES | NO  |
| 72 | ag | 255.06 | 0.00000  | NO  | YES |
| 73 | ag | 257.88 | 0.00000  | NO  | YES |
| 74 | au | 258.33 | 0.75308  | YES | NO  |
| 75 | ag | 273.01 | 0.00000  | NO  | YES |
| 76 | au | 273.05 | 0.78038  | YES | NO  |
| 77 | ag | 276.88 | 0.00000  | NO  | YES |
| 78 | au | 277.04 | 4.28331  | YES | NO  |
| 79 | au | 349.85 | 15.42203 | YES | NO  |
| 80 | ag | 349.89 | 0.00000  | NO  | YES |
| 81 | ag | 382.46 | 0.00000  | NO  | YES |
| 82 | au | 382.67 | 33.39866 | YES | NO  |
| 83 | au | 387.69 | 2.11115  | YES | NO  |
| 84 | ag | 388.28 | 0.00000  | NO  | YES |
| 85 | ag | 394.92 | 0.00000  | NO  | YES |
| 86 | au | 395.41 | 0.89423  | YES | NO  |
| 87 | ag | 402.08 | 0.00000  | NO  | YES |
| 88 | au | 402.71 | 0.91560  | YES | NO  |
| 89 | au | 404.57 | 1.11545  | YES | NO  |

|     |    |        |           |     |     |
|-----|----|--------|-----------|-----|-----|
| 90  | ag | 404.90 | 0.00000   | NO  | YES |
| 91  | ag | 409.66 | 0.00000   | NO  | YES |
| 92  | au | 410.35 | 0.27428   | YES | NO  |
| 93  | au | 413.96 | 0.27705   | YES | NO  |
| 94  | ag | 414.84 | 0.00000   | NO  | YES |
| 95  | ag | 431.30 | 0.00000   | NO  | YES |
| 96  | au | 431.59 | 0.96822   | YES | NO  |
| 97  | ag | 434.47 | 0.00000   | NO  | YES |
| 98  | au | 434.73 | 12.13419  | YES | NO  |
| 99  | ag | 442.89 | 0.00000   | NO  | YES |
| 100 | au | 442.92 | 0.75982   | YES | NO  |
| 101 | ag | 453.04 | 0.00000   | NO  | YES |
| 102 | au | 453.44 | 3.26819   | YES | NO  |
| 103 | au | 471.77 | 2.87933   | YES | NO  |
| 104 | ag | 472.23 | 0.00000   | NO  | YES |
| 105 | ag | 493.81 | 0.00000   | NO  | YES |
| 106 | au | 495.74 | 150.27933 | YES | NO  |
| 107 | ag | 500.70 | 0.00000   | NO  | YES |
| 108 | au | 501.09 | 38.97383  | YES | NO  |
| 109 | au | 508.07 | 19.22663  | YES | NO  |
| 110 | ag | 508.74 | 0.00000   | NO  | YES |
| 111 | ag | 516.77 | 0.00000   | NO  | YES |
| 112 | au | 516.90 | 35.75481  | YES | NO  |
| 113 | ag | 524.19 | 0.00000   | NO  | YES |
| 114 | au | 524.66 | 258.61093 | YES | NO  |
| 115 | au | 560.72 | 13.15976  | YES | NO  |
| 116 | ag | 561.02 | 0.00000   | NO  | YES |
| 117 | au | 608.08 | 0.99120   | YES | NO  |
| 118 | ag | 608.15 | 0.00000   | NO  | YES |
| 119 | au | 609.02 | 0.03779   | YES | NO  |
| 120 | ag | 609.05 | 0.00000   | NO  | YES |
| 121 | ag | 609.44 | 0.00000   | NO  | YES |
| 122 | au | 609.54 | 0.02256   | YES | NO  |
| 123 | au | 610.16 | 0.45992   | YES | NO  |
| 124 | ag | 610.20 | 0.00000   | NO  | YES |
| 125 | au | 611.00 | 0.90524   | YES | NO  |
| 126 | ag | 611.10 | 0.00000   | NO  | YES |
| 127 | ag | 611.79 | 0.00000   | NO  | YES |
| 128 | au | 611.87 | 0.47592   | YES | NO  |
| 129 | au | 676.69 | 39.52162  | YES | NO  |
| 130 | ag | 677.04 | 0.00000   | NO  | YES |
| 131 | ag | 678.46 | 0.00000   | NO  | YES |
| 132 | au | 678.55 | 15.75245  | YES | NO  |
| 133 | ag | 693.04 | 0.00000   | NO  | YES |
| 134 | au | 693.11 | 155.27254 | YES | NO  |
| 135 | ag | 693.67 | 0.00000   | NO  | YES |
| 136 | au | 693.72 | 32.03903  | YES | NO  |
| 137 | au | 698.81 | 41.76570  | YES | NO  |
| 138 | ag | 698.90 | 0.00000   | NO  | YES |
| 139 | ag | 701.60 | 0.00000   | NO  | YES |
| 140 | au | 701.78 | 32.94870  | YES | NO  |
| 141 | ag | 703.28 | 0.00000   | NO  | YES |
| 142 | au | 703.42 | 23.49456  | YES | NO  |
| 143 | au | 704.03 | 4.50518   | YES | NO  |
| 144 | ag | 704.89 | 0.00000   | NO  | YES |
| 145 | ag | 706.45 | 0.00000   | NO  | YES |
| 146 | au | 706.94 | 2.68820   | YES | NO  |
| 147 | au | 708.21 | 8.27715   | YES | NO  |

|     |    |        |            |     |     |
|-----|----|--------|------------|-----|-----|
| 148 | ag | 708.34 | 0.00000    | NO  | YES |
| 149 | ag | 713.36 | 0.00000    | NO  | YES |
| 150 | au | 713.45 | 53.19001   | YES | NO  |
| 151 | ag | 716.59 | 0.00000    | NO  | YES |
| 152 | au | 716.78 | 83.66074   | YES | NO  |
| 153 | ag | 735.18 | 0.00000    | NO  | YES |
| 154 | au | 735.63 | 95.35410   | YES | NO  |
| 155 | ag | 738.30 | 0.00000    | NO  | YES |
| 156 | au | 738.67 | 64.25337   | YES | NO  |
| 157 | au | 740.75 | 23.28039   | YES | NO  |
| 158 | ag | 740.99 | 0.00000    | NO  | YES |
| 159 | au | 743.24 | 74.94239   | YES | NO  |
| 160 | ag | 743.90 | 0.00000    | NO  | YES |
| 161 | au | 745.10 | 6.07379    | YES | NO  |
| 162 | ag | 745.33 | 0.00000    | NO  | YES |
| 163 | ag | 746.81 | 0.00000    | NO  | YES |
| 164 | au | 747.12 | 52.48314   | YES | NO  |
| 165 | au | 790.39 | 1188.95751 | YES | NO  |
| 166 | ag | 801.87 | 0.00000    | NO  | YES |
| 167 | ag | 831.41 | 0.00000    | NO  | YES |
| 168 | au | 832.20 | 1.10435    | YES | NO  |
| 169 | au | 833.83 | 1.23139    | YES | NO  |
| 170 | ag | 834.74 | 0.00000    | NO  | YES |
| 171 | ag | 840.77 | 0.00000    | NO  | YES |
| 172 | au | 840.92 | 2.04995    | YES | NO  |
| 173 | au | 841.58 | 4.35797    | YES | NO  |
| 174 | ag | 841.75 | 0.00000    | NO  | YES |
| 175 | au | 845.09 | 2.50797    | YES | NO  |
| 176 | ag | 845.26 | 0.00000    | NO  | YES |
| 177 | au | 849.68 | 2.94580    | YES | NO  |
| 178 | ag | 849.83 | 0.00000    | NO  | YES |
| 179 | au | 908.53 | 2.46210    | YES | NO  |
| 180 | ag | 908.75 | 0.00000    | NO  | YES |
| 181 | au | 912.79 | 1.17352    | YES | NO  |
| 182 | ag | 912.85 | 0.00000    | NO  | YES |
| 183 | au | 919.83 | 0.75737    | YES | NO  |
| 184 | ag | 919.86 | 0.00000    | NO  | YES |
| 185 | ag | 922.66 | 0.00000    | NO  | YES |
| 186 | au | 922.80 | 3.79223    | YES | NO  |
| 187 | au | 923.99 | 0.96124    | YES | NO  |
| 188 | ag | 924.02 | 0.00000    | NO  | YES |
| 189 | ag | 931.01 | 0.00000    | NO  | YES |
| 190 | au | 931.12 | 0.74779    | YES | NO  |
| 191 | au | 961.87 | 1.98482    | YES | NO  |
| 192 | ag | 961.98 | 0.00000    | NO  | YES |
| 193 | ag | 967.11 | 0.00000    | NO  | YES |
| 194 | au | 967.35 | 0.21645    | YES | NO  |
| 195 | ag | 969.35 | 0.00000    | NO  | YES |
| 196 | au | 969.40 | 1.12351    | YES | NO  |
| 197 | au | 971.32 | 0.93627    | YES | NO  |
| 198 | ag | 971.67 | 0.00000    | NO  | YES |
| 199 | ag | 971.73 | 0.00000    | NO  | YES |
| 200 | au | 971.86 | 1.79507    | YES | NO  |
| 201 | au | 975.57 | 0.87628    | YES | NO  |
| 202 | ag | 975.64 | 0.00000    | NO  | YES |
| 203 | ag | 983.93 | 0.00000    | NO  | YES |
| 204 | au | 984.07 | 41.28743   | YES | NO  |
| 205 | au | 984.76 | 2.30217    | YES | NO  |

|     |    |         |           |     |     |
|-----|----|---------|-----------|-----|-----|
| 206 | ag | 984.92  | 0.00000   | NO  | YES |
| 207 | ag | 985.29  | 0.00000   | NO  | YES |
| 208 | au | 985.36  | 8.35639   | YES | NO  |
| 209 | au | 986.51  | 9.99100   | YES | NO  |
| 210 | ag | 986.54  | 0.00000   | NO  | YES |
| 211 | ag | 987.64  | 0.00000   | NO  | YES |
| 212 | au | 987.65  | 1.70869   | YES | NO  |
| 213 | au | 989.29  | 0.79244   | YES | NO  |
| 214 | ag | 989.68  | 0.00000   | NO  | YES |
| 215 | ag | 990.84  | 0.00000   | NO  | YES |
| 216 | au | 991.08  | 1.04495   | YES | NO  |
| 217 | au | 997.81  | 0.26409   | YES | NO  |
| 218 | ag | 997.83  | 0.00000   | NO  | YES |
| 219 | au | 999.17  | 0.13321   | YES | NO  |
| 220 | ag | 999.18  | 0.00000   | NO  | YES |
| 221 | au | 999.83  | 0.46510   | YES | NO  |
| 222 | ag | 999.83  | 0.00000   | NO  | YES |
| 223 | ag | 1000.47 | 0.00000   | NO  | YES |
| 224 | au | 1000.49 | 0.37189   | YES | NO  |
| 225 | au | 1001.29 | 0.29993   | YES | NO  |
| 226 | ag | 1001.31 | 0.00000   | NO  | YES |
| 227 | ag | 1021.64 | 0.00000   | NO  | YES |
| 228 | au | 1021.75 | 10.11658  | YES | NO  |
| 229 | ag | 1022.18 | 0.00000   | NO  | YES |
| 230 | au | 1022.24 | 2.04597   | YES | NO  |
| 231 | ag | 1023.10 | 0.00000   | NO  | YES |
| 232 | au | 1023.28 | 3.58303   | YES | NO  |
| 233 | au | 1023.75 | 11.56002  | YES | NO  |
| 234 | ag | 1023.94 | 0.00000   | NO  | YES |
| 235 | ag | 1024.31 | 0.00000   | NO  | YES |
| 236 | au | 1024.34 | 0.56717   | YES | NO  |
| 237 | au | 1025.76 | 0.99315   | YES | NO  |
| 238 | ag | 1025.81 | 0.00000   | NO  | YES |
| 239 | ag | 1044.05 | 0.00000   | NO  | YES |
| 240 | au | 1045.42 | 497.00665 | YES | NO  |
| 241 | au | 1068.23 | 3.19560   | YES | NO  |
| 242 | ag | 1068.38 | 0.00000   | NO  | YES |
| 243 | ag | 1070.22 | 0.00000   | NO  | YES |
| 244 | au | 1070.36 | 2.03853   | YES | NO  |
| 245 | ag | 1071.95 | 0.00000   | NO  | YES |
| 246 | au | 1071.97 | 8.19454   | YES | NO  |
| 247 | au | 1073.33 | 4.20821   | YES | NO  |
| 248 | ag | 1073.39 | 0.00000   | NO  | YES |
| 249 | au | 1076.88 | 0.05305   | YES | NO  |
| 250 | ag | 1076.92 | 0.00000   | NO  | YES |
| 251 | au | 1078.33 | 10.89570  | YES | NO  |
| 252 | ag | 1078.36 | 0.00000   | NO  | YES |
| 253 | au | 1088.57 | 80.22605  | YES | NO  |
| 254 | ag | 1088.71 | 0.00000   | NO  | YES |
| 255 | ag | 1089.94 | 0.00000   | NO  | YES |
| 256 | au | 1090.41 | 95.78495  | YES | NO  |
| 257 | au | 1090.83 | 85.94336  | YES | NO  |
| 258 | ag | 1090.83 | 0.00000   | NO  | YES |
| 259 | au | 1092.25 | 83.58380  | YES | NO  |
| 260 | ag | 1092.69 | 0.00000   | NO  | YES |
| 261 | ag | 1093.79 | 0.00000   | NO  | YES |
| 262 | au | 1093.90 | 161.54695 | YES | NO  |
| 263 | au | 1094.05 | 97.90957  | YES | NO  |

|     |    |         |          |     |     |
|-----|----|---------|----------|-----|-----|
| 264 | ag | 1094.09 | 0.00000  | NO  | YES |
| 265 | ag | 1139.83 | 0.00000  | NO  | YES |
| 266 | au | 1139.87 | 0.84759  | YES | NO  |
| 267 | au | 1144.99 | 0.48725  | YES | NO  |
| 268 | ag | 1145.00 | 0.00000  | NO  | YES |
| 269 | ag | 1145.71 | 0.00000  | NO  | YES |
| 270 | au | 1145.72 | 0.34447  | YES | NO  |
| 271 | au | 1145.89 | 1.15822  | YES | NO  |
| 272 | ag | 1145.97 | 0.00000  | NO  | YES |
| 273 | au | 1146.53 | 1.60574  | YES | NO  |
| 274 | ag | 1146.54 | 0.00000  | NO  | YES |
| 275 | ag | 1147.64 | 0.00000  | NO  | YES |
| 276 | au | 1147.64 | 1.22055  | YES | NO  |
| 277 | au | 1159.00 | 1.54638  | YES | NO  |
| 278 | ag | 1159.12 | 0.00000  | NO  | YES |
| 279 | au | 1159.52 | 2.56285  | YES | NO  |
| 280 | ag | 1160.02 | 0.00000  | NO  | YES |
| 281 | ag | 1160.44 | 0.00000  | NO  | YES |
| 282 | au | 1161.11 | 3.41895  | YES | NO  |
| 283 | ag | 1161.56 | 0.00000  | NO  | YES |
| 284 | au | 1161.71 | 2.22059  | YES | NO  |
| 285 | ag | 1165.74 | 0.00000  | NO  | YES |
| 286 | au | 1165.78 | 2.62281  | YES | NO  |
| 287 | au | 1169.59 | 4.23707  | YES | NO  |
| 288 | ag | 1169.81 | 0.00000  | NO  | YES |
| 289 | au | 1273.96 | 1.36453  | YES | NO  |
| 290 | ag | 1273.97 | 0.00000  | NO  | YES |
| 291 | ag | 1278.40 | 0.00000  | NO  | YES |
| 292 | au | 1278.41 | 3.81566  | YES | NO  |
| 293 | ag | 1279.27 | 0.00000  | NO  | YES |
| 294 | au | 1279.29 | 11.60460 | YES | NO  |
| 295 | ag | 1280.31 | 0.00000  | NO  | YES |
| 296 | au | 1280.34 | 11.50016 | YES | NO  |
| 297 | au | 1287.12 | 2.90877  | YES | NO  |
| 298 | ag | 1287.13 | 0.00000  | NO  | YES |
| 299 | au | 1289.95 | 5.23518  | YES | NO  |
| 300 | ag | 1289.96 | 0.00000  | NO  | YES |
| 301 | au | 1361.29 | 1.31904  | YES | NO  |
| 302 | ag | 1361.34 | 0.00000  | NO  | YES |
| 303 | ag | 1365.08 | 0.00000  | NO  | YES |
| 304 | au | 1365.09 | 3.40027  | YES | NO  |
| 305 | ag | 1365.93 | 0.00000  | NO  | YES |
| 306 | au | 1366.00 | 2.15318  | YES | NO  |
| 307 | au | 1366.45 | 0.88360  | YES | NO  |
| 308 | ag | 1366.48 | 0.00000  | NO  | YES |
| 309 | ag | 1369.21 | 0.00000  | NO  | YES |
| 310 | au | 1369.24 | 2.42325  | YES | NO  |
| 311 | au | 1370.52 | 0.76712  | YES | NO  |
| 312 | ag | 1370.53 | 0.00000  | NO  | YES |
| 313 | au | 1418.62 | 13.28184 | YES | NO  |
| 314 | ag | 1418.77 | 0.00000  | NO  | YES |
| 315 | ag | 1422.74 | 0.00000  | NO  | YES |
| 316 | au | 1422.74 | 27.40394 | YES | NO  |
| 317 | ag | 1423.50 | 0.00000  | NO  | YES |
| 318 | au | 1423.69 | 67.22299 | YES | NO  |
| 319 | au | 1424.26 | 6.66862  | YES | NO  |
| 320 | ag | 1424.27 | 0.00000  | NO  | YES |
| 321 | ag | 1428.56 | 0.00000  | NO  | YES |

|     |    |         |          |     |     |
|-----|----|---------|----------|-----|-----|
| 322 | au | 1428.57 | 14.53726 | YES | NO  |
| 323 | au | 1428.95 | 60.89851 | YES | NO  |
| 324 | ag | 1429.03 | 0.00000  | NO  | YES |
| 325 | ag | 1459.10 | 0.00000  | NO  | YES |
| 326 | au | 1459.15 | 16.50885 | YES | NO  |
| 327 | au | 1461.17 | 14.15374 | YES | NO  |
| 328 | ag | 1461.30 | 0.00000  | NO  | YES |
| 329 | ag | 1461.88 | 0.00000  | NO  | YES |
| 330 | au | 1461.98 | 12.81167 | YES | NO  |
| 331 | ag | 1462.27 | 0.00000  | NO  | YES |
| 332 | au | 1462.30 | 2.37518  | YES | NO  |
| 333 | ag | 1464.98 | 0.00000  | NO  | YES |
| 334 | au | 1464.99 | 16.08794 | YES | NO  |
| 335 | au | 1466.02 | 14.01671 | YES | NO  |
| 336 | ag | 1466.07 | 0.00000  | NO  | YES |
| 337 | au | 1577.88 | 1.70207  | YES | NO  |
| 338 | ag | 1577.98 | 0.00000  | NO  | YES |
| 339 | au | 1580.96 | 0.68070  | YES | NO  |
| 340 | ag | 1580.99 | 0.00000  | NO  | YES |
| 341 | au | 1582.62 | 0.57585  | YES | NO  |
| 342 | ag | 1582.62 | 0.00000  | NO  | YES |
| 343 | au | 1583.77 | 1.04304  | YES | NO  |
| 344 | ag | 1583.77 | 0.00000  | NO  | YES |
| 345 | au | 1586.13 | 1.99990  | YES | NO  |
| 346 | ag | 1586.17 | 0.00000  | NO  | YES |
| 347 | au | 1586.90 | 4.07331  | YES | NO  |
| 348 | ag | 1586.99 | 0.00000  | NO  | YES |
| 349 | au | 1593.24 | 4.28804  | YES | NO  |
| 350 | ag | 1593.30 | 0.00000  | NO  | YES |
| 351 | ag | 1594.48 | 0.00000  | NO  | YES |
| 352 | au | 1594.50 | 1.14197  | YES | NO  |
| 353 | ag | 1596.57 | 0.00000  | NO  | YES |
| 354 | au | 1596.57 | 0.39181  | YES | NO  |
| 355 | au | 1597.57 | 2.96241  | YES | NO  |
| 356 | ag | 1597.58 | 0.00000  | NO  | YES |
| 357 | ag | 1598.41 | 0.00000  | NO  | YES |
| 358 | au | 1598.42 | 5.06011  | YES | NO  |
| 359 | au | 1599.17 | 6.46770  | YES | NO  |
| 360 | ag | 1599.21 | 0.00000  | NO  | YES |
| 361 | au | 3062.05 | 19.84334 | YES | NO  |
| 362 | ag | 3062.12 | 0.00000  | NO  | YES |
| 363 | ag | 3097.91 | 0.00000  | NO  | YES |
| 364 | au | 3097.99 | 4.22999  | YES | NO  |
| 365 | au | 3099.92 | 8.60013  | YES | NO  |
| 366 | ag | 3100.00 | 0.00000  | NO  | YES |
| 367 | au | 3109.33 | 0.31699  | YES | NO  |
| 368 | ag | 3109.34 | 0.00000  | NO  | YES |
| 369 | ag | 3112.27 | 0.00000  | NO  | YES |
| 370 | au | 3112.27 | 0.28686  | YES | NO  |
| 371 | au | 3113.28 | 0.15626  | YES | NO  |
| 372 | ag | 3113.28 | 0.00000  | NO  | YES |
| 373 | au | 3114.60 | 3.26982  | YES | NO  |
| 374 | ag | 3114.61 | 0.00000  | NO  | YES |
| 375 | ag | 3114.68 | 0.00000  | NO  | YES |
| 376 | au | 3114.68 | 1.12211  | YES | NO  |
| 377 | au | 3115.22 | 1.51137  | YES | NO  |
| 378 | ag | 3115.23 | 0.00000  | NO  | YES |
| 379 | ag | 3115.59 | 0.00000  | NO  | YES |

|     |    |         |         |     |     |
|-----|----|---------|---------|-----|-----|
| 380 | au | 3115.59 | 0.92245 | YES | NO  |
| 381 | ag | 3118.82 | 0.00000 | NO  | YES |
| 382 | au | 3118.82 | 0.14547 | YES | NO  |
| 383 | au | 3120.27 | 3.10405 | YES | NO  |
| 384 | ag | 3120.27 | 0.00000 | NO  | YES |
| 385 | ag | 3121.61 | 0.00000 | NO  | YES |
| 386 | au | 3121.61 | 1.52478 | YES | NO  |
| 387 | ag | 3122.19 | 0.00000 | NO  | YES |
| 388 | au | 3122.20 | 0.62799 | YES | NO  |
| 389 | au | 3123.39 | 0.22633 | YES | NO  |
| 390 | ag | 3123.39 | 0.00000 | NO  | YES |
| 391 | ag | 3124.92 | 0.00000 | NO  | YES |
| 392 | au | 3124.93 | 1.26933 | YES | NO  |
| 393 | au | 3125.28 | 0.57235 | YES | NO  |
| 394 | ag | 3125.28 | 0.00000 | NO  | YES |
| 395 | au | 3127.80 | 6.27998 | YES | NO  |
| 396 | ag | 3127.80 | 0.00000 | NO  | YES |
| 397 | ag | 3129.77 | 0.00000 | NO  | YES |
| 398 | au | 3129.77 | 2.33478 | YES | NO  |
| 399 | au | 3129.89 | 0.52282 | YES | NO  |
| 400 | ag | 3129.89 | 0.00000 | NO  | YES |
| 401 | ag | 3130.64 | 0.00000 | NO  | YES |
| 402 | au | 3130.64 | 5.27321 | YES | NO  |
| 403 | au | 3131.74 | 1.05564 | YES | NO  |
| 404 | ag | 3131.74 | 0.00000 | NO  | YES |
| 405 | ag | 3131.92 | 0.00000 | NO  | YES |
| 406 | au | 3131.92 | 7.04875 | YES | NO  |
| 407 | ag | 3137.25 | 0.00000 | NO  | YES |
| 408 | au | 3137.25 | 5.79453 | YES | NO  |
| 409 | ag | 3137.44 | 0.00000 | NO  | YES |
| 410 | au | 3137.44 | 1.41755 | YES | NO  |
| 411 | ag | 3137.53 | 0.00000 | NO  | YES |
| 412 | au | 3137.55 | 5.71709 | YES | NO  |
| 413 | au | 3138.86 | 6.30869 | YES | NO  |
| 414 | ag | 3138.86 | 0.00000 | NO  | YES |
| 415 | au | 3139.23 | 4.28404 | YES | NO  |
| 416 | ag | 3139.24 | 0.00000 | NO  | YES |
| 417 | au | 3139.50 | 8.36078 | YES | NO  |
| 418 | ag | 3139.51 | 0.00000 | NO  | YES |
| 419 | ag | 3144.66 | 0.00000 | NO  | YES |
| 420 | au | 3144.66 | 4.55334 | YES | NO  |

Send

Method: (RI-)pbeh-3c(D3)/def2-mSVP  
Symmetry: ci

Cartesian coordinates in Ångström:

|    |            |            |            |
|----|------------|------------|------------|
| Ga | -1.3611341 | 0.5790760  | 0.1465951  |
| P  | -1.9288995 | 2.3856961  | -2.3146307 |
| C  | -2.4282471 | 0.9457025  | -1.5305661 |
| P  | -3.5799610 | -0.1595951 | -2.1646389 |
| C  | -0.4889486 | 2.9857741  | -1.3763530 |
| C  | -0.7086390 | 3.7717241  | -0.2407842 |
| H  | -1.7147731 | 4.0586766  | 0.0396027  |
| C  | 0.3645333  | 4.2188019  | 0.5125272  |
| H  | 0.1904808  | 4.8406946  | 1.3798979  |

|   |            |            |            |
|---|------------|------------|------------|
| C | 1.6596419  | 3.8834162  | 0.1445794  |
| H | 2.4954924  | 4.2399130  | 0.7307984  |
| C | 1.8842317  | 3.1042961  | -0.9799666 |
| H | 2.8941519  | 2.8559617  | -1.2773705 |
| C | 0.8147011  | 2.6566423  | -1.7421092 |
| H | 1.0073414  | 2.0742111  | -2.6329242 |
| C | -1.4213668 | 2.1582657  | -4.0399113 |
| C | -1.8059331 | 3.0203555  | -5.0648969 |
| H | -2.4187081 | 3.8868811  | -4.8597822 |
| C | -1.4324619 | 2.7514278  | -6.3728082 |
| H | -1.7367493 | 3.4230642  | -7.1640648 |
| C | -0.6806684 | 1.6236289  | -6.6684383 |
| H | -0.3978453 | 1.4157138  | -7.6915769 |
| C | -0.2998580 | 0.7586726  | -5.6522946 |
| H | 0.2749586  | -0.1291703 | -5.8780317 |
| C | -0.6699098 | 1.0228173  | -4.3444757 |
| H | -0.3860974 | 0.3326800  | -3.5606882 |
| C | -3.0734951 | 3.7851921  | -2.2575972 |
| C | -4.3698877 | 3.6233327  | -1.7881857 |
| H | -4.7066710 | 2.6544760  | -1.4497524 |
| C | -5.2324429 | 4.7087017  | -1.7389921 |
| H | -6.2436909 | 4.5743896  | -1.3801359 |
| C | -4.7967347 | 5.9600530  | -2.1440086 |
| H | -5.4691011 | 6.8064403  | -2.1042539 |
| C | -3.4914507 | 6.1334803  | -2.5883984 |
| H | -3.1448401 | 7.1134279  | -2.8870084 |
| C | -2.6291272 | 5.0526117  | -2.6422453 |
| H | -1.6072929 | 5.2035417  | -2.9709534 |
| C | -2.8877831 | -1.4505780 | -3.2371361 |
| C | -3.6294539 | -2.0005116 | -4.2815485 |
| H | -4.6319817 | -1.6504773 | -4.4904439 |
| C | -3.0823087 | -3.0009075 | -5.0711037 |
| H | -3.6610463 | -3.4187175 | -5.8835399 |
| C | -1.7966137 | -3.4583543 | -4.8235418 |
| H | -1.3693019 | -4.2321627 | -5.4472473 |
| C | -1.0602300 | -2.9218876 | -3.7763663 |
| H | -0.0563071 | -3.2743637 | -3.5796177 |
| C | -1.6043192 | -1.9256928 | -2.9827741 |
| H | -1.0141624 | -1.5089651 | -2.1750141 |
| C | -4.9288849 | 0.5811148  | -3.1175593 |
| C | -6.2062925 | 0.7003071  | -2.5751480 |
| H | -6.4379074 | 0.2769433  | -1.6064470 |
| C | -7.1988502 | 1.3629427  | -3.2815469 |
| H | -8.1911170 | 1.4474313  | -2.8596100 |
| C | -6.9232818 | 1.9060445  | -4.5273113 |
| H | -7.6994232 | 2.4231404  | -5.0751380 |
| C | -5.6568499 | 1.7708060  | -5.0793502 |
| H | -5.4444147 | 2.1760057  | -6.0593073 |
| C | -4.6622005 | 1.1070200  | -4.3819572 |
| H | -3.6866522 | 0.9883878  | -4.8355938 |
| C | -4.3590419 | -1.0323636 | -0.7796360 |
| C | -4.8088365 | -2.3421567 | -0.9326863 |
| H | -4.6414575 | -2.8748632 | -1.8599511 |
| C | -5.4784752 | -2.9726688 | 0.1044012  |
| H | -5.8311612 | -3.9873824 | -0.0221121 |
| C | -5.7004228 | -2.3030709 | 1.3007680  |
| H | -6.2248436 | -2.7975173 | 2.1074323  |
| C | -5.2600613 | -0.9966669 | 1.4565617  |



|    |            |            |            |
|----|------------|------------|------------|
| H  | -5.4451587 | -0.4676651 | 2.3816348  |
| C  | -4.5983440 | -0.3580969 | 0.4173371  |
| H  | -4.2970831 | 0.6761970  | 0.5299401  |
| Ga | 1.3611341  | -0.5790760 | -0.1465951 |
| P  | 1.9288995  | -2.3856961 | 2.3146307  |
| C  | 2.4282471  | -0.9457025 | 1.5305661  |
| P  | 3.5799610  | 0.1595951  | 2.1646389  |
| C  | 0.4889486  | -2.9857741 | 1.3763530  |
| C  | 0.7086390  | -3.7717241 | 0.2407842  |
| H  | 1.7147731  | -4.0586766 | -0.0396027 |
| C  | -0.3645333 | -4.2188019 | -0.5125272 |
| H  | -0.1904808 | -4.8406946 | -1.3798979 |
| C  | -1.6596419 | -3.8834162 | -0.1445794 |
| H  | -2.4954924 | -4.2399130 | -0.7307984 |
| C  | -1.8842317 | -3.1042961 | 0.9799666  |
| H  | -2.8941519 | -2.8559617 | 1.2773705  |
| C  | -0.8147011 | -2.6566423 | 1.7421092  |
| H  | -1.0073414 | -2.0742111 | 2.6329242  |
| C  | 1.4213668  | -2.1582657 | 4.0399113  |
| C  | 1.8059331  | -3.0203555 | 5.0648969  |
| H  | 2.4187081  | -3.8868811 | 4.8597822  |
| C  | 1.4324619  | -2.7514278 | 6.3728082  |
| H  | 1.7367493  | -3.4230642 | 7.1640648  |
| C  | 0.6806684  | -1.6236289 | 6.6684383  |
| H  | 0.3978453  | -1.4157138 | 7.6915769  |
| C  | 0.2998580  | -0.7586726 | 5.6522946  |
| H  | -0.2749586 | 0.1291703  | 5.8780317  |
| C  | 0.6699098  | -1.0228173 | 4.3444757  |
| H  | 0.3860974  | -0.3326800 | 3.5606882  |
| C  | 3.0734951  | -3.7851921 | 2.2575972  |
| C  | 4.3698877  | -3.6233327 | 1.7881857  |
| H  | 4.7066710  | -2.6544760 | 1.4497524  |
| C  | 5.2324429  | -4.7087017 | 1.7389921  |
| H  | 6.2436909  | -4.5743896 | 1.3801359  |
| C  | 4.7967347  | -5.9600530 | 2.1440086  |
| H  | 5.4691011  | -6.8064403 | 2.1042539  |
| C  | 3.4914507  | -6.1334803 | 2.5883984  |
| H  | 3.1448401  | -7.1134279 | 2.8870084  |
| C  | 2.6291272  | -5.0526117 | 2.6422453  |
| H  | 1.6072929  | -5.2035417 | 2.9709534  |
| C  | 2.8877831  | 1.4505780  | 3.2371361  |
| C  | 3.6294539  | 2.0005116  | 4.2815485  |
| H  | 4.6319817  | 1.6504773  | 4.4904439  |
| C  | 3.0823087  | 3.0009075  | 5.0711037  |
| H  | 3.6610463  | 3.4187175  | 5.8835399  |
| C  | 1.7966137  | 3.4583543  | 4.8235418  |
| H  | 1.3693019  | 4.2321627  | 5.4472473  |
| C  | 1.0602300  | 2.9218876  | 3.7763663  |
| H  | 0.0563071  | 3.2743637  | 3.5796177  |
| C  | 1.6043192  | 1.9256928  | 2.9827741  |
| H  | 1.0141624  | 1.5089651  | 2.1750141  |
| C  | 4.9288849  | -0.5811148 | 3.1175593  |
| C  | 6.2062925  | -0.7003071 | 2.5751480  |
| H  | 6.4379074  | -0.2769433 | 1.6064470  |
| C  | 7.1988502  | -1.3629427 | 3.2815469  |
| H  | 8.1911170  | -1.4474313 | 2.8596100  |
| C  | 6.9232818  | -1.9060445 | 4.5273113  |
| H  | 7.6994232  | -2.4231404 | 5.0751380  |

|   |           |            |            |
|---|-----------|------------|------------|
| C | 5.6568499 | -1.7708060 | 5.0793502  |
| H | 5.4444147 | -2.1760057 | 6.0593073  |
| C | 4.6622005 | -1.1070200 | 4.3819572  |
| H | 3.6866522 | -0.9883878 | 4.8355938  |
| C | 4.3590419 | 1.0323636  | 0.7796360  |
| C | 4.8088365 | 2.3421567  | 0.9326863  |
| H | 4.6414575 | 2.8748632  | 1.8599511  |
| C | 5.4784752 | 2.9726688  | -0.1044012 |
| H | 5.8311612 | 3.9873824  | 0.0221121  |
| C | 5.7004228 | 2.3030709  | -1.3007680 |
| H | 6.2248436 | 2.7975173  | -2.1074323 |
| C | 5.2600613 | 0.9966669  | -1.4565617 |
| H | 5.4451587 | 0.4676651  | -2.3816348 |
| C | 4.5983440 | 0.3580969  | -0.4173371 |
| H | 4.2970831 | -0.6761970 | -0.5299401 |

SCF energy GEOOPT = -8060.881239220 H  
 ZPE = 3026. kJ/mol  
 FREEH energy = 3210.72 kJ/mol  
 FREEH entropy = 1.64482 kJ/mol/K

\$vibrational spectrum

| # | mode | symmetry | wave number<br>cm**(-1) | IR intensity<br>km/mol | selection rules |       |
|---|------|----------|-------------------------|------------------------|-----------------|-------|
| # |      |          |                         |                        | IR              | RAMAN |
|   | 1    |          | -0.00                   | 0.00000                | -               | -     |
|   | 2    |          | -0.00                   | 0.00000                | -               | -     |
|   | 3    |          | -0.00                   | 0.00000                | -               | -     |
|   | 4    |          | -0.00                   | 0.00000                | -               | -     |
|   | 5    |          | 0.00                    | 0.00000                | -               | -     |
|   | 6    |          | 0.00                    | 0.00000                | -               | -     |
|   | 7    | au       | 8.93                    | 0.09497                | YES             | NO    |
|   | 8    | ag       | 13.50                   | 0.00000                | NO              | YES   |
|   | 9    | au       | 13.67                   | 0.16212                | YES             | NO    |
|   | 10   | au       | 19.55                   | 0.16875                | YES             | NO    |
|   | 11   | ag       | 26.16                   | 0.00000                | NO              | YES   |
|   | 12   | au       | 28.18                   | 0.17635                | YES             | NO    |
|   | 13   | ag       | 29.00                   | 0.00000                | NO              | YES   |
|   | 14   | au       | 29.92                   | 0.43609                | YES             | NO    |
|   | 15   | ag       | 32.27                   | 0.00000                | NO              | YES   |
|   | 16   | au       | 34.33                   | 0.18099                | YES             | NO    |
|   | 17   | ag       | 36.14                   | 0.00000                | NO              | YES   |
|   | 18   | ag       | 39.99                   | 0.00000                | NO              | YES   |
|   | 19   | ag       | 46.30                   | 0.00000                | NO              | YES   |
|   | 20   | au       | 47.79                   | 0.75847                | YES             | NO    |
|   | 21   | ag       | 50.85                   | 0.00000                | NO              | YES   |
|   | 22   | au       | 51.57                   | 0.24298                | YES             | NO    |
|   | 23   | ag       | 54.72                   | 0.00000                | NO              | YES   |
|   | 24   | au       | 55.72                   | 0.21024                | YES             | NO    |
|   | 25   | au       | 56.89                   | 0.35269                | YES             | NO    |
|   | 26   | au       | 61.03                   | 0.13048                | YES             | NO    |
|   | 27   | ag       | 61.09                   | 0.00000                | NO              | YES   |
|   | 28   | ag       | 63.39                   | 0.00000                | NO              | YES   |
|   | 29   | au       | 64.24                   | 0.10644                | YES             | NO    |
|   | 30   | ag       | 65.87                   | 0.00000                | NO              | YES   |
|   | 31   | au       | 68.56                   | 0.65734                | YES             | NO    |
|   | 32   | ag       | 70.90                   | 0.00000                | NO              | YES   |
|   | 33   | au       | 71.57                   | 1.05867                | YES             | NO    |
|   | 34   | au       | 75.52                   | 0.68314                | YES             | NO    |

|    |    |        |          |     |     |
|----|----|--------|----------|-----|-----|
| 35 | ag | 79.58  | 0.00000  | NO  | YES |
| 36 | ag | 82.80  | 0.00000  | NO  | YES |
| 37 | au | 83.96  | 0.69010  | YES | NO  |
| 38 | ag | 86.95  | 0.00000  | NO  | YES |
| 39 | au | 92.90  | 0.34516  | YES | NO  |
| 40 | ag | 95.78  | 0.00000  | NO  | YES |
| 41 | au | 96.29  | 0.16943  | YES | NO  |
| 42 | ag | 102.21 | 0.00000  | NO  | YES |
| 43 | au | 102.58 | 0.03868  | YES | NO  |
| 44 | ag | 105.92 | 0.00000  | NO  | YES |
| 45 | au | 108.64 | 0.02041  | YES | NO  |
| 46 | ag | 109.16 | 0.00000  | NO  | YES |
| 47 | au | 110.53 | 0.94849  | YES | NO  |
| 48 | ag | 117.62 | 0.00000  | NO  | YES |
| 49 | au | 128.55 | 3.23248  | YES | NO  |
| 50 | ag | 129.60 | 0.00000  | NO  | YES |
| 51 | au | 148.83 | 11.51437 | YES | NO  |
| 52 | ag | 154.60 | 0.00000  | NO  | YES |
| 53 | ag | 205.40 | 0.00000  | NO  | YES |
| 54 | au | 205.75 | 11.58394 | YES | NO  |
| 55 | au | 212.31 | 15.02783 | YES | NO  |
| 56 | ag | 213.88 | 0.00000  | NO  | YES |
| 57 | au | 220.94 | 13.98659 | YES | NO  |
| 58 | ag | 221.78 | 0.00000  | NO  | YES |
| 59 | au | 223.14 | 4.46353  | YES | NO  |
| 60 | ag | 224.77 | 0.00000  | NO  | YES |
| 61 | au | 226.02 | 1.09986  | YES | NO  |
| 62 | ag | 227.96 | 0.00000  | NO  | YES |
| 63 | ag | 238.80 | 0.00000  | NO  | YES |
| 64 | au | 239.30 | 7.23458  | YES | NO  |
| 65 | au | 247.85 | 2.84371  | YES | NO  |
| 66 | ag | 248.05 | 0.00000  | NO  | YES |
| 67 | ag | 261.25 | 0.00000  | NO  | YES |
| 68 | au | 261.75 | 3.11007  | YES | NO  |
| 69 | au | 263.37 | 4.23628  | YES | NO  |
| 70 | ag | 263.92 | 0.00000  | NO  | YES |
| 71 | au | 270.18 | 1.08690  | YES | NO  |
| 72 | ag | 270.65 | 0.00000  | NO  | YES |
| 73 | au | 274.31 | 1.07735  | YES | NO  |
| 74 | ag | 274.42 | 0.00000  | NO  | YES |
| 75 | au | 286.26 | 2.88290  | YES | NO  |
| 76 | ag | 286.84 | 0.00000  | NO  | YES |
| 77 | ag | 287.96 | 0.00000  | NO  | YES |
| 78 | au | 288.28 | 1.14462  | YES | NO  |
| 79 | au | 365.14 | 6.63827  | YES | NO  |
| 80 | ag | 366.80 | 0.00000  | NO  | YES |
| 81 | ag | 408.85 | 0.00000  | NO  | YES |
| 82 | au | 409.31 | 44.67387 | YES | NO  |
| 83 | au | 416.04 | 0.20313  | YES | NO  |
| 84 | ag | 416.24 | 0.00000  | NO  | YES |
| 85 | ag | 418.02 | 0.00000  | NO  | YES |
| 86 | au | 418.48 | 0.78386  | YES | NO  |
| 87 | au | 422.32 | 0.78696  | YES | NO  |
| 88 | ag | 422.55 | 0.00000  | NO  | YES |
| 89 | au | 425.11 | 0.98986  | YES | NO  |
| 90 | ag | 425.51 | 0.00000  | NO  | YES |
| 91 | au | 429.29 | 0.15741  | YES | NO  |
| 92 | ag | 429.75 | 0.00000  | NO  | YES |

|     |    |        |           |     |     |
|-----|----|--------|-----------|-----|-----|
| 93  | ag | 432.71 | 0.00000   | NO  | YES |
| 94  | au | 433.17 | 0.23069   | YES | NO  |
| 95  | au | 452.68 | 0.94300   | YES | NO  |
| 96  | ag | 453.10 | 0.00000   | NO  | YES |
| 97  | au | 464.93 | 8.45939   | YES | NO  |
| 98  | ag | 465.21 | 0.00000   | NO  | YES |
| 99  | au | 472.84 | 12.44413  | YES | NO  |
| 100 | ag | 473.24 | 0.00000   | NO  | YES |
| 101 | ag | 477.85 | 0.00000   | NO  | YES |
| 102 | au | 478.47 | 6.86902   | YES | NO  |
| 103 | ag | 490.08 | 0.00000   | NO  | YES |
| 104 | au | 490.96 | 5.24401   | YES | NO  |
| 105 | au | 526.67 | 93.43142  | YES | NO  |
| 106 | ag | 528.79 | 0.00000   | NO  | YES |
| 107 | ag | 532.53 | 0.00000   | NO  | YES |
| 108 | au | 533.99 | 123.38221 | YES | NO  |
| 109 | au | 538.63 | 92.36731  | YES | NO  |
| 110 | ag | 538.70 | 0.00000   | NO  | YES |
| 111 | ag | 548.31 | 0.00000   | NO  | YES |
| 112 | au | 548.70 | 16.18493  | YES | NO  |
| 113 | ag | 556.32 | 0.00000   | NO  | YES |
| 114 | au | 556.73 | 218.68263 | YES | NO  |
| 115 | au | 599.05 | 5.00124   | YES | NO  |
| 116 | ag | 600.07 | 0.00000   | NO  | YES |
| 117 | ag | 641.74 | 0.00000   | NO  | YES |
| 118 | au | 641.85 | 0.04845   | YES | NO  |
| 119 | au | 642.27 | 0.07973   | YES | NO  |
| 120 | ag | 642.42 | 0.00000   | NO  | YES |
| 121 | ag | 642.83 | 0.00000   | NO  | YES |
| 122 | au | 642.84 | 0.12059   | YES | NO  |
| 123 | au | 643.14 | 0.16889   | YES | NO  |
| 124 | ag | 643.18 | 0.00000   | NO  | YES |
| 125 | au | 643.67 | 0.53594   | YES | NO  |
| 126 | ag | 643.76 | 0.00000   | NO  | YES |
| 127 | ag | 644.68 | 0.00000   | NO  | YES |
| 128 | au | 644.83 | 1.15477   | YES | NO  |
| 129 | au | 714.79 | 86.52791  | YES | NO  |
| 130 | ag | 715.42 | 0.00000   | NO  | YES |
| 131 | au | 715.56 | 3.77530   | YES | NO  |
| 132 | ag | 715.87 | 0.00000   | NO  | YES |
| 133 | au | 728.39 | 82.72398  | YES | NO  |
| 134 | ag | 728.94 | 0.00000   | NO  | YES |
| 135 | ag | 731.94 | 0.00000   | NO  | YES |
| 136 | au | 732.39 | 77.54974  | YES | NO  |
| 137 | au | 734.37 | 95.17094  | YES | NO  |
| 138 | ag | 734.63 | 0.00000   | NO  | YES |
| 139 | ag | 734.90 | 0.00000   | NO  | YES |
| 140 | au | 735.20 | 77.23225  | YES | NO  |
| 141 | au | 737.63 | 32.23128  | YES | NO  |
| 142 | ag | 737.70 | 0.00000   | NO  | YES |
| 143 | au | 738.85 | 11.28743  | YES | NO  |
| 144 | ag | 738.95 | 0.00000   | NO  | YES |
| 145 | au | 743.96 | 0.56469   | YES | NO  |
| 146 | ag | 744.54 | 0.00000   | NO  | YES |
| 147 | au | 749.50 | 8.24436   | YES | NO  |
| 148 | ag | 749.84 | 0.00000   | NO  | YES |
| 149 | au | 750.14 | 42.59344  | YES | NO  |
| 150 | ag | 750.23 | 0.00000   | NO  | YES |

|     |    |         |            |     |     |
|-----|----|---------|------------|-----|-----|
| 151 | ag | 754.15  | 0.00000    | NO  | YES |
| 152 | au | 754.21  | 80.77290   | YES | NO  |
| 153 | ag | 789.88  | 0.00000    | NO  | YES |
| 154 | au | 790.53  | 351.78772  | YES | NO  |
| 155 | au | 792.72  | 73.34809   | YES | NO  |
| 156 | ag | 792.82  | 0.00000    | NO  | YES |
| 157 | ag | 794.04  | 0.00000    | NO  | YES |
| 158 | au | 794.05  | 127.56239  | YES | NO  |
| 159 | au | 795.39  | 109.80507  | YES | NO  |
| 160 | ag | 797.78  | 0.00000    | NO  | YES |
| 161 | au | 798.94  | 134.96372  | YES | NO  |
| 162 | ag | 798.99  | 0.00000    | NO  | YES |
| 163 | ag | 800.39  | 0.00000    | NO  | YES |
| 164 | au | 801.12  | 28.34040   | YES | NO  |
| 165 | au | 833.70  | 1454.98211 | YES | NO  |
| 166 | ag | 854.39  | 0.00000    | NO  | YES |
| 167 | ag | 900.13  | 0.00000    | NO  | YES |
| 168 | au | 900.46  | 0.55191    | YES | NO  |
| 169 | ag | 902.17  | 0.00000    | NO  | YES |
| 170 | au | 903.14  | 9.51777    | YES | NO  |
| 171 | au | 904.12  | 0.40103    | YES | NO  |
| 172 | ag | 904.15  | 0.00000    | NO  | YES |
| 173 | au | 906.93  | 2.42120    | YES | NO  |
| 174 | ag | 908.28  | 0.00000    | NO  | YES |
| 175 | ag | 910.43  | 0.00000    | NO  | YES |
| 176 | au | 910.98  | 1.15776    | YES | NO  |
| 177 | au | 912.80  | 4.39796    | YES | NO  |
| 178 | ag | 912.87  | 0.00000    | NO  | YES |
| 179 | au | 986.66  | 1.34593    | YES | NO  |
| 180 | ag | 987.01  | 0.00000    | NO  | YES |
| 181 | ag | 989.61  | 0.00000    | NO  | YES |
| 182 | au | 989.69  | 2.26827    | YES | NO  |
| 183 | ag | 990.69  | 0.00000    | NO  | YES |
| 184 | au | 990.72  | 0.74761    | YES | NO  |
| 185 | au | 993.22  | 3.70938    | YES | NO  |
| 186 | ag | 993.57  | 0.00000    | NO  | YES |
| 187 | ag | 998.05  | 0.00000    | NO  | YES |
| 188 | au | 998.31  | 0.17070    | YES | NO  |
| 189 | au | 998.60  | 1.09563    | YES | NO  |
| 190 | ag | 998.86  | 0.00000    | NO  | YES |
| 191 | au | 1038.44 | 11.40463   | YES | NO  |
| 192 | ag | 1038.80 | 0.00000    | NO  | YES |
| 193 | ag | 1039.39 | 0.00000    | NO  | YES |
| 194 | au | 1039.48 | 4.77871    | YES | NO  |
| 195 | ag | 1039.98 | 0.00000    | NO  | YES |
| 196 | au | 1040.32 | 16.64691   | YES | NO  |
| 197 | au | 1040.45 | 9.53236    | YES | NO  |
| 198 | ag | 1040.55 | 0.00000    | NO  | YES |
| 199 | ag | 1040.98 | 0.00000    | NO  | YES |
| 200 | au | 1041.34 | 6.00439    | YES | NO  |
| 201 | au | 1042.15 | 5.37780    | YES | NO  |
| 202 | ag | 1042.45 | 0.00000    | NO  | YES |
| 203 | ag | 1043.21 | 0.00000    | NO  | YES |
| 204 | au | 1043.27 | 7.29504    | YES | NO  |
| 205 | ag | 1043.65 | 0.00000    | NO  | YES |
| 206 | au | 1043.71 | 6.47707    | YES | NO  |
| 207 | au | 1044.15 | 2.23609    | YES | NO  |
| 208 | ag | 1044.28 | 0.00000    | NO  | YES |

|     |    |         |           |     |     |
|-----|----|---------|-----------|-----|-----|
| 209 | au | 1044.84 | 2.93711   | YES | NO  |
| 210 | ag | 1045.61 | 0.00000   | NO  | YES |
| 211 | ag | 1048.06 | 0.00000   | NO  | YES |
| 212 | au | 1048.20 | 3.81576   | YES | NO  |
| 213 | ag | 1048.81 | 0.00000   | NO  | YES |
| 214 | au | 1048.99 | 0.89372   | YES | NO  |
| 215 | ag | 1065.14 | 0.00000   | NO  | YES |
| 216 | au | 1065.20 | 0.18532   | YES | NO  |
| 217 | au | 1067.78 | 0.36794   | YES | NO  |
| 218 | ag | 1067.84 | 0.00000   | NO  | YES |
| 219 | ag | 1069.15 | 0.00000   | NO  | YES |
| 220 | au | 1069.22 | 0.46396   | YES | NO  |
| 221 | au | 1070.56 | 0.27557   | YES | NO  |
| 222 | ag | 1070.59 | 0.00000   | NO  | YES |
| 223 | au | 1070.75 | 0.50730   | YES | NO  |
| 224 | ag | 1070.79 | 0.00000   | NO  | YES |
| 225 | au | 1071.19 | 0.70678   | YES | NO  |
| 226 | ag | 1071.21 | 0.00000   | NO  | YES |
| 227 | ag | 1083.20 | 0.00000   | NO  | YES |
| 228 | au | 1083.31 | 12.81757  | YES | NO  |
| 229 | au | 1084.34 | 0.93814   | YES | NO  |
| 230 | ag | 1084.34 | 0.00000   | NO  | YES |
| 231 | ag | 1084.58 | 0.00000   | NO  | YES |
| 232 | au | 1084.63 | 1.39759   | YES | NO  |
| 233 | au | 1085.29 | 1.79980   | YES | NO  |
| 234 | ag | 1085.32 | 0.00000   | NO  | YES |
| 235 | ag | 1085.62 | 0.00000   | NO  | YES |
| 236 | au | 1085.66 | 3.56683   | YES | NO  |
| 237 | au | 1085.77 | 0.58383   | YES | NO  |
| 238 | ag | 1085.84 | 0.00000   | NO  | YES |
| 239 | ag | 1120.92 | 0.00000   | NO  | YES |
| 240 | au | 1123.40 | 697.00560 | YES | NO  |
| 241 | ag | 1143.09 | 0.00000   | NO  | YES |
| 242 | au | 1143.16 | 7.51164   | YES | NO  |
| 243 | au | 1144.55 | 8.94456   | YES | NO  |
| 244 | ag | 1144.59 | 0.00000   | NO  | YES |
| 245 | ag | 1145.03 | 0.00000   | NO  | YES |
| 246 | au | 1145.50 | 6.28858   | YES | NO  |
| 247 | au | 1146.35 | 1.24926   | YES | NO  |
| 248 | ag | 1146.86 | 0.00000   | NO  | YES |
| 249 | au | 1149.43 | 2.31581   | YES | NO  |
| 250 | ag | 1149.65 | 0.00000   | NO  | YES |
| 251 | ag | 1151.44 | 0.00000   | NO  | YES |
| 252 | au | 1151.61 | 3.98980   | YES | NO  |
| 253 | au | 1162.16 | 124.50558 | YES | NO  |
| 254 | ag | 1162.21 | 0.00000   | NO  | YES |
| 255 | au | 1162.43 | 136.62713 | YES | NO  |
| 256 | ag | 1162.52 | 0.00000   | NO  | YES |
| 257 | ag | 1164.98 | 0.00000   | NO  | YES |
| 258 | au | 1165.64 | 205.12235 | YES | NO  |
| 259 | au | 1165.67 | 85.69275  | YES | NO  |
| 260 | ag | 1165.88 | 0.00000   | NO  | YES |
| 261 | au | 1166.09 | 180.55044 | YES | NO  |
| 262 | ag | 1166.26 | 0.00000   | NO  | YES |
| 263 | au | 1167.11 | 121.28368 | YES | NO  |
| 264 | ag | 1167.18 | 0.00000   | NO  | YES |
| 265 | au | 1220.00 | 7.43167   | YES | NO  |
| 266 | ag | 1220.01 | 0.00000   | NO  | YES |

|     |    |         |          |     |     |
|-----|----|---------|----------|-----|-----|
| 267 | ag | 1220.19 | 0.00000  | NO  | YES |
| 268 | au | 1220.20 | 0.30036  | YES | NO  |
| 269 | au | 1222.28 | 1.68045  | YES | NO  |
| 270 | ag | 1222.32 | 0.00000  | NO  | YES |
| 271 | au | 1222.57 | 2.08916  | YES | NO  |
| 272 | ag | 1222.57 | 0.00000  | NO  | YES |
| 273 | ag | 1222.73 | 0.00000  | NO  | YES |
| 274 | au | 1222.76 | 0.48688  | YES | NO  |
| 275 | ag | 1223.74 | 0.00000  | NO  | YES |
| 276 | au | 1223.74 | 1.47979  | YES | NO  |
| 277 | ag | 1246.77 | 0.00000  | NO  | YES |
| 278 | au | 1246.80 | 1.74189  | YES | NO  |
| 279 | au | 1248.56 | 4.27700  | YES | NO  |
| 280 | ag | 1248.69 | 0.00000  | NO  | YES |
| 281 | au | 1249.99 | 9.57720  | YES | NO  |
| 282 | ag | 1250.00 | 0.00000  | NO  | YES |
| 283 | ag | 1251.32 | 0.00000  | NO  | YES |
| 284 | au | 1251.73 | 10.22828 | YES | NO  |
| 285 | ag | 1254.63 | 0.00000  | NO  | YES |
| 286 | au | 1254.68 | 4.85413  | YES | NO  |
| 287 | au | 1255.98 | 2.05969  | YES | NO  |
| 288 | ag | 1256.21 | 0.00000  | NO  | YES |
| 289 | au | 1365.01 | 13.29302 | YES | NO  |
| 290 | ag | 1365.52 | 0.00000  | NO  | YES |
| 291 | ag | 1365.88 | 0.00000  | NO  | YES |
| 292 | au | 1366.25 | 3.98601  | YES | NO  |
| 293 | ag | 1367.80 | 0.00000  | NO  | YES |
| 294 | au | 1367.88 | 6.16299  | YES | NO  |
| 295 | au | 1368.96 | 5.91821  | YES | NO  |
| 296 | ag | 1368.97 | 0.00000  | NO  | YES |
| 297 | au | 1374.51 | 3.92735  | YES | NO  |
| 298 | ag | 1374.52 | 0.00000  | NO  | YES |
| 299 | ag | 1376.67 | 0.00000  | NO  | YES |
| 300 | au | 1376.67 | 5.49786  | YES | NO  |
| 301 | au | 1403.94 | 1.81727  | YES | NO  |
| 302 | ag | 1403.97 | 0.00000  | NO  | YES |
| 303 | au | 1404.65 | 4.35407  | YES | NO  |
| 304 | ag | 1404.83 | 0.00000  | NO  | YES |
| 305 | ag | 1405.53 | 0.00000  | NO  | YES |
| 306 | au | 1405.55 | 3.23878  | YES | NO  |
| 307 | ag | 1406.34 | 0.00000  | NO  | YES |
| 308 | au | 1406.66 | 3.11704  | YES | NO  |
| 309 | au | 1407.87 | 4.61016  | YES | NO  |
| 310 | ag | 1408.24 | 0.00000  | NO  | YES |
| 311 | au | 1409.69 | 3.01302  | YES | NO  |
| 312 | ag | 1409.70 | 0.00000  | NO  | YES |
| 313 | ag | 1515.81 | 0.00000  | NO  | YES |
| 314 | au | 1515.84 | 38.22621 | YES | NO  |
| 315 | au | 1519.43 | 63.63072 | YES | NO  |
| 316 | ag | 1519.53 | 0.00000  | NO  | YES |
| 317 | ag | 1520.01 | 0.00000  | NO  | YES |
| 318 | au | 1520.03 | 30.40700 | YES | NO  |
| 319 | ag | 1521.06 | 0.00000  | NO  | YES |
| 320 | au | 1521.09 | 34.06238 | YES | NO  |
| 321 | au | 1524.15 | 57.29652 | YES | NO  |
| 322 | ag | 1524.17 | 0.00000  | NO  | YES |
| 323 | au | 1524.82 | 66.91887 | YES | NO  |
| 324 | ag | 1524.82 | 0.00000  | NO  | YES |

|     |    |         |          |     |     |
|-----|----|---------|----------|-----|-----|
| 325 | au | 1569.98 | 18.43802 | YES | NO  |
| 326 | ag | 1570.07 | 0.00000  | NO  | YES |
| 327 | ag | 1570.44 | 0.00000  | NO  | YES |
| 328 | au | 1570.54 | 24.62268 | YES | NO  |
| 329 | au | 1571.54 | 1.64714  | YES | NO  |
| 330 | ag | 1571.55 | 0.00000  | NO  | YES |
| 331 | ag | 1571.73 | 0.00000  | NO  | YES |
| 332 | au | 1571.75 | 15.39688 | YES | NO  |
| 333 | au | 1572.42 | 22.10725 | YES | NO  |
| 334 | ag | 1572.44 | 0.00000  | NO  | YES |
| 335 | ag | 1573.79 | 0.00000  | NO  | YES |
| 336 | au | 1573.80 | 17.02455 | YES | NO  |
| 337 | au | 1689.46 | 0.61371  | YES | NO  |
| 338 | ag | 1689.61 | 0.00000  | NO  | YES |
| 339 | au | 1691.38 | 0.88232  | YES | NO  |
| 340 | ag | 1691.38 | 0.00000  | NO  | YES |
| 341 | ag | 1692.40 | 0.00000  | NO  | YES |
| 342 | au | 1692.43 | 1.56946  | YES | NO  |
| 343 | au | 1692.63 | 2.16471  | YES | NO  |
| 344 | ag | 1692.75 | 0.00000  | NO  | YES |
| 345 | au | 1694.95 | 3.37371  | YES | NO  |
| 346 | ag | 1694.99 | 0.00000  | NO  | YES |
| 347 | au | 1696.49 | 3.88019  | YES | NO  |
| 348 | ag | 1696.52 | 0.00000  | NO  | YES |
| 349 | au | 1706.85 | 5.31087  | YES | NO  |
| 350 | ag | 1706.92 | 0.00000  | NO  | YES |
| 351 | ag | 1707.45 | 0.00000  | NO  | YES |
| 352 | au | 1707.48 | 3.57438  | YES | NO  |
| 353 | au | 1709.44 | 13.39788 | YES | NO  |
| 354 | ag | 1709.45 | 0.00000  | NO  | YES |
| 355 | ag | 1709.84 | 0.00000  | NO  | YES |
| 356 | au | 1709.87 | 2.28499  | YES | NO  |
| 357 | ag | 1710.24 | 0.00000  | NO  | YES |
| 358 | au | 1710.25 | 22.43896 | YES | NO  |
| 359 | au | 1711.24 | 7.75932  | YES | NO  |
| 360 | ag | 1711.24 | 0.00000  | NO  | YES |
| 361 | au | 3252.17 | 0.04999  | YES | NO  |
| 362 | ag | 3252.19 | 0.00000  | NO  | YES |
| 363 | ag | 3256.37 | 0.00000  | NO  | YES |
| 364 | au | 3256.37 | 2.21911  | YES | NO  |
| 365 | au | 3262.25 | 4.87070  | YES | NO  |
| 366 | ag | 3262.27 | 0.00000  | NO  | YES |
| 367 | au | 3265.77 | 0.60656  | YES | NO  |
| 368 | ag | 3265.78 | 0.00000  | NO  | YES |
| 369 | au | 3272.80 | 0.47150  | YES | NO  |
| 370 | ag | 3272.80 | 0.00000  | NO  | YES |
| 371 | ag | 3272.99 | 0.00000  | NO  | YES |
| 372 | au | 3272.99 | 0.23748  | YES | NO  |
| 373 | au | 3273.44 | 0.64458  | YES | NO  |
| 374 | ag | 3273.45 | 0.00000  | NO  | YES |
| 375 | ag | 3273.73 | 0.00000  | NO  | YES |
| 376 | au | 3273.74 | 1.31599  | YES | NO  |
| 377 | ag | 3275.86 | 0.00000  | NO  | YES |
| 378 | au | 3275.86 | 0.88024  | YES | NO  |
| 379 | ag | 3277.98 | 0.00000  | NO  | YES |
| 380 | au | 3277.98 | 2.03220  | YES | NO  |
| 381 | au | 3279.49 | 0.05963  | YES | NO  |
| 382 | ag | 3279.49 | 0.00000  | NO  | YES |



|     |    |         |         |     |     |
|-----|----|---------|---------|-----|-----|
| 383 | ag | 3279.83 | 0.00000 | NO  | YES |
| 384 | au | 3279.84 | 0.60962 | YES | NO  |
| 385 | au | 3280.41 | 5.05390 | YES | NO  |
| 386 | ag | 3280.42 | 0.00000 | NO  | YES |
| 387 | ag | 3281.71 | 0.00000 | NO  | YES |
| 388 | au | 3281.71 | 0.50695 | YES | NO  |
| 389 | ag | 3283.69 | 0.00000 | NO  | YES |
| 390 | au | 3283.69 | 0.08393 | YES | NO  |
| 391 | au | 3285.89 | 1.70759 | YES | NO  |
| 392 | ag | 3285.89 | 0.00000 | NO  | YES |
| 393 | au | 3287.34 | 5.14264 | YES | NO  |
| 394 | ag | 3287.36 | 0.00000 | NO  | YES |
| 395 | ag | 3287.52 | 0.00000 | NO  | YES |
| 396 | au | 3287.54 | 0.93695 | YES | NO  |
| 397 | ag | 3288.94 | 0.00000 | NO  | YES |
| 398 | au | 3288.94 | 1.75983 | YES | NO  |
| 399 | au | 3289.92 | 1.25441 | YES | NO  |
| 400 | ag | 3289.92 | 0.00000 | NO  | YES |
| 401 | ag | 3291.14 | 0.00000 | NO  | YES |
| 402 | au | 3291.14 | 2.28552 | YES | NO  |
| 403 | au | 3293.48 | 2.22390 | YES | NO  |
| 404 | ag | 3293.49 | 0.00000 | NO  | YES |
| 405 | au | 3294.79 | 0.95425 | YES | NO  |
| 406 | ag | 3294.79 | 0.00000 | NO  | YES |
| 407 | au | 3297.55 | 3.80544 | YES | NO  |
| 408 | ag | 3297.56 | 0.00000 | NO  | YES |
| 409 | au | 3297.81 | 3.56794 | YES | NO  |
| 410 | ag | 3297.82 | 0.00000 | NO  | YES |
| 411 | ag | 3298.44 | 0.00000 | NO  | YES |
| 412 | au | 3298.44 | 2.47980 | YES | NO  |
| 413 | au | 3299.42 | 5.04070 | YES | NO  |
| 414 | ag | 3299.42 | 0.00000 | NO  | YES |
| 415 | au | 3300.27 | 6.42375 | YES | NO  |
| 416 | ag | 3300.27 | 0.00000 | NO  | YES |
| 417 | ag | 3300.58 | 0.00000 | NO  | YES |
| 418 | au | 3300.60 | 5.02248 | YES | NO  |
| 419 | au | 3307.00 | 2.90051 | YES | NO  |
| 420 | ag | 3307.00 | 0.00000 | NO  | YES |

§end

## 8.8 2<sup>2+</sup> (positions of non-hydrogen atoms as found in the solid state structure; optimized positions of H atoms)

Method: (RI-)BP86 (D3BJ) /def2-TZVPP

Symmetry: ci

Cartesian coordinates in Ångström:

|    |            |            |            |
|----|------------|------------|------------|
| Ga | -1.3327353 | 0.1115299  | 0.1429312  |
| P  | -1.6226553 | 2.2346999  | -2.1865088 |
| C  | -2.3788453 | 0.9450399  | -1.3510588 |
| P  | -3.6286953 | -0.0412601 | -1.9802088 |
| C  | -0.4488053 | 3.0193499  | -1.0476988 |
| C  | -0.7329253 | 3.0762699  | 0.3241512  |
| H  | -1.6760854 | 2.6798375  | 0.7029783  |
| C  | 0.1595147  | 3.6936899  | 1.1995412  |
| H  | -0.0653114 | 3.7243971  | 2.2644678  |
| C  | 1.3161347  | 4.2893699  | 0.7156312  |

|   |            |            |            |
|---|------------|------------|------------|
| H | 2.0080975  | 4.7727681  | 1.4040012  |
| C | 1.5695047  | 4.2968699  | -0.6519288 |
| H | 2.4579083  | 4.7904054  | -1.0419570 |
| C | 0.6964647  | 3.6637899  | -1.5329288 |
| H | 0.9105413  | 3.6703627  | -2.6000968 |
| C | -0.7102253 | 1.7436999  | -3.6672888 |
| C | -1.3582653 | 1.6744299  | -4.9070988 |
| H | -2.3676856 | 2.0675470  | -5.0173106 |
| C | -0.7164153 | 1.1095199  | -6.0020088 |
| H | -1.2286162 | 1.0666072  | -6.9624003 |
| C | 0.5692447  | 0.5986599  | -5.8735988 |
| H | 1.0676289  | 0.1581756  | -6.7366957 |
| C | 1.2171847  | 0.6549199  | -4.6473188 |
| H | 2.2266431  | 0.2572047  | -4.5428533 |
| C | 0.5882747  | 1.2252299  | -3.5481288 |
| H | 1.0979905  | 1.2461918  | -2.5855140 |
| C | -2.7391053 | 3.5711299  | -2.6634888 |
| C | -3.8787253 | 3.7829299  | -1.8808488 |
| H | -4.0921692 | 3.1097000  | -1.0514258 |
| C | -4.7445553 | 4.8273599  | -2.1799088 |
| H | -5.6369339 | 4.9796018  | -1.5743856 |
| C | -4.4735153 | 5.6688199  | -3.2540188 |
| H | -5.1553888 | 6.4842070  | -3.4933992 |
| C | -3.3309453 | 5.4754499  | -4.0178388 |
| H | -3.1122775 | 6.1427275  | -4.8511578 |
| C | -2.4529853 | 4.4358699  | -3.7247288 |
| H | -1.5548340 | 4.2997808  | -4.3253339 |
| C | -3.1098653 | -1.0965001 | -3.3599788 |
| C | -4.0070153 | -1.5589301 | -4.3337388 |
| H | -5.0688028 | -1.3290099 | -4.2537728 |
| C | -3.5354453 | -2.2829101 | -5.4243488 |
| H | -4.2339127 | -2.6240157 | -6.1876190 |
| C | -2.1768453 | -2.5616601 | -5.5438488 |
| H | -1.8114039 | -3.1134239 | -6.4096020 |
| C | -1.2910453 | -2.1484401 | -4.5581988 |
| H | -0.2276790 | -2.3669981 | -4.6496895 |
| C | -1.7520253 | -1.4142001 | -3.4685788 |
| H | -1.0500989 | -1.0473661 | -2.7195389 |
| C | -5.1029753 | 0.8316399  | -2.5634688 |
| C | -6.1826753 | 1.0488499  | -1.7032588 |
| H | -6.1895236 | 0.6100632  | -0.7061557 |
| C | -7.2635253 | 1.8212499  | -2.1280788 |
| H | -8.1083283 | 1.9812356  | -1.4591934 |
| C | -7.2679653 | 2.3717099  | -3.4045388 |
| H | -8.1163136 | 2.9714043  | -3.7331365 |
| C | -6.1995753 | 2.1551699  | -4.2640888 |
| H | -6.2050342 | 2.5840099  | -5.2653897 |
| C | -5.1204253 | 1.3860699  | -3.8498288 |
| H | -4.2878015 | 1.2103654  | -4.5295465 |
| C | -4.1518353 | -1.1344501 | -0.6291488 |
| C | -4.4940353 | -2.4654701 | -0.8717688 |
| H | -4.4357093 | -2.8674991 | -1.8826041 |
| C | -4.9013253 | -3.2835501 | 0.1812212  |
| H | -5.1759508 | -4.3186537 | -0.0198590 |
| C | -4.9577653 | -2.7871401 | 1.4781412  |
| H | -5.2761837 | -3.4333510 | 2.2956879  |
| C | -4.6259953 | -1.4627401 | 1.7276812  |
| H | -4.6895755 | -1.0606929 | 2.7381673  |

|    |            |            |            |
|----|------------|------------|------------|
| C  | -4.2316853 | -0.6339601 | 0.6786612  |
| H  | -4.0186773 | 0.4185905  | 0.8677207  |
| Ga | 1.3327353  | -0.1115299 | -0.1429312 |
| P  | 1.6226553  | -2.2346999 | 2.1865088  |
| C  | 2.3788453  | -0.9450399 | 1.3510588  |
| P  | 3.6286953  | 0.0412601  | 1.9802088  |
| C  | 0.4488053  | -3.0193499 | 1.0476988  |
| C  | 0.7329253  | -3.0762699 | -0.3241512 |
| H  | 1.6760854  | -2.6798375 | -0.7029783 |
| C  | -0.1595147 | -3.6936899 | -1.1995412 |
| H  | 0.0653114  | -3.7243971 | -2.2644678 |
| C  | -1.3161347 | -4.2893699 | -0.7156312 |
| H  | -2.0080975 | -4.7727681 | -1.4040012 |
| C  | -1.5695047 | -4.2968699 | 0.6519288  |
| H  | -2.4579083 | -4.7904054 | 1.0419570  |
| C  | -0.6964647 | -3.6637899 | 1.5329288  |
| H  | -0.9105413 | -3.6703627 | 2.6000968  |
| C  | 0.7102253  | -1.7436999 | 3.6672888  |
| C  | 1.3582653  | -1.6744299 | 4.9070988  |
| H  | 2.3676856  | -2.0675470 | 5.0173106  |
| C  | 0.7164153  | -1.1095199 | 6.0020088  |
| H  | 1.2286162  | -1.0666072 | 6.9624003  |
| C  | -0.5692447 | -0.5986599 | 5.8735988  |
| H  | -1.0676289 | -0.1581756 | 6.7366957  |
| C  | -1.2171847 | -0.6549199 | 4.6473188  |
| H  | -2.2266431 | -0.2572047 | 4.5428533  |
| C  | -0.5882747 | -1.2252299 | 3.5481288  |
| H  | -1.0979905 | -1.2461918 | 2.5855140  |
| C  | 2.7391053  | -3.5711299 | 2.6634888  |
| C  | 3.8787253  | -3.7829299 | 1.8808488  |
| H  | 4.0921692  | -3.1097000 | 1.0514258  |
| C  | 4.7445553  | -4.8273599 | 2.1799088  |
| H  | 5.6369339  | -4.9796018 | 1.5743856  |
| C  | 4.4735153  | -5.6688199 | 3.2540188  |
| H  | 5.1553888  | -6.4842070 | 3.4933992  |
| C  | 3.3309453  | -5.4754499 | 4.0178388  |
| H  | 3.1122775  | -6.1427275 | 4.8511578  |
| C  | 2.4529853  | -4.4358699 | 3.7247288  |
| H  | 1.5548340  | -4.2997808 | 4.3253339  |
| C  | 3.1098653  | 1.0965001  | 3.3599788  |
| C  | 4.0070153  | 1.5589301  | 4.3337388  |
| H  | 5.0688028  | 1.3290099  | 4.2537728  |
| C  | 3.5354453  | 2.2829101  | 5.4243488  |
| H  | 4.2339127  | 2.6240157  | 6.1876190  |
| C  | 2.1768453  | 2.5616601  | 5.5438488  |
| H  | 1.8114039  | 3.1134239  | 6.4096020  |
| C  | 1.2910453  | 2.1484401  | 4.5581988  |
| H  | 0.2276790  | 2.3669981  | 4.6496895  |
| C  | 1.7520253  | 1.4142001  | 3.4685788  |
| H  | 1.0500989  | 1.0473661  | 2.7195389  |
| C  | 5.1029753  | -0.8316399 | 2.5634688  |
| C  | 6.1826753  | -1.0488499 | 1.7032588  |
| H  | 6.1895236  | -0.6100632 | 0.7061557  |
| C  | 7.2635253  | -1.8212499 | 2.1280788  |
| H  | 8.1083283  | -1.9812356 | 1.4591934  |
| C  | 7.2679653  | -2.3717099 | 3.4045388  |
| H  | 8.1163136  | -2.9714043 | 3.7331365  |
| C  | 6.1995753  | -2.1551699 | 4.2640888  |

|   |           |            |            |
|---|-----------|------------|------------|
| H | 6.2050342 | -2.5840099 | 5.2653897  |
| C | 5.1204253 | -1.3860699 | 3.8498288  |
| H | 4.2878015 | -1.2103654 | 4.5295465  |
| C | 4.1518353 | 1.1344501  | 0.6291488  |
| C | 4.4940353 | 2.4654701  | 0.8717688  |
| H | 4.4357093 | 2.8674991  | 1.8826041  |
| C | 4.9013253 | 3.2835501  | -0.1812212 |
| H | 5.1759508 | 4.3186537  | 0.0198590  |
| C | 4.9577653 | 2.7871401  | -1.4781412 |
| H | 5.2761837 | 3.4333510  | -2.2956879 |
| C | 4.6259953 | 1.4627401  | -1.7276812 |
| H | 4.6895755 | 1.0606929  | -2.7381673 |
| C | 4.2316853 | 0.6339601  | -0.6786612 |
| H | 4.0186773 | -0.4185905 | -0.8677207 |

SCF energy GEOOPT = -8073.078142926 H

## 8.9 [Ga(CDP<sup>Ph</sup>)]<sup>+</sup>

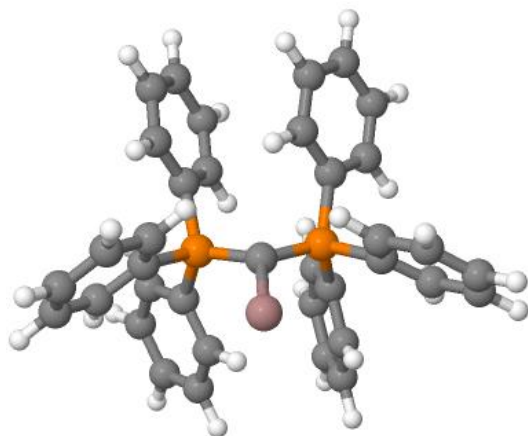

Method: (RI-)BP86(D3BJ)/def2-TZVPP  
Symmetry: c1

Cartesian coordinates in Ångström:

|   |            |            |            |
|---|------------|------------|------------|
| C | -4.3053879 | 0.5386114  | 0.0727101  |
| H | -4.3838707 | 1.2084095  | 5.7210030  |
| C | -3.6937787 | 1.3928044  | 4.8987020  |
| H | -2.7035167 | 3.0384536  | 5.8851901  |
| C | -2.7501279 | 2.4198621  | 4.9897070  |
| C | -3.7547334 | 0.6038137  | 3.7530827  |
| H | -4.4835750 | -0.2020465 | 3.6860685  |
| H | -1.9262755 | 2.0327870  | -0.4928792 |
| C | -1.8596135 | 2.6457257  | 3.9378333  |
| C | -2.8732784 | 0.8371633  | 2.6849173  |
| H | -1.1114453 | 3.4339600  | 4.0145475  |
| P | -3.1006824 | -0.0719844 | 1.1304987  |
| C | -1.9183408 | 1.8580933  | 2.7867754  |
| C | -1.2457743 | 1.1817073  | -0.5319677 |
| H | -4.3669122 | -2.2716980 | -0.2096521 |
| H | 0.1517996  | 2.1608259  | -1.8485490 |
| C | -3.9598622 | -2.6717642 | 0.7183064  |
| C | -0.0742149 | 1.2551152  | -1.2872193 |
| C | -1.5450426 | 0.0139679  | 0.1970889  |
| C | -3.3057888 | -1.8111953 | 1.6097408  |

|    |            |            |            |
|----|------------|------------|------------|
| H  | -1.2165672 | 2.0348104  | 1.9726165  |
| C  | -4.1042340 | -4.0225244 | 1.0280341  |
| H  | -4.6205853 | -4.6848647 | 0.3345991  |
| C  | -2.7802978 | -2.3178694 | 2.8087660  |
| C  | 0.8026756  | 0.1683091  | -1.3221540 |
| C  | -3.5943265 | -4.5219517 | 2.2291525  |
| C  | -0.6575461 | -1.0703019 | 0.1616233  |
| H  | -2.2575461 | -1.6580095 | 3.4996285  |
| C  | -2.9294402 | -3.6707062 | 3.1157668  |
| C  | 0.5106605  | -0.9902582 | -0.5980528 |
| H  | 1.7139919  | 0.2236872  | -1.9163891 |
| H  | -3.7126562 | -5.5769987 | 2.4740314  |
| H  | -0.8865129 | -1.9791442 | 0.7160725  |
| H  | -2.5239483 | -4.0607585 | 4.0486797  |
| H  | 1.1922965  | -1.8394060 | -0.6288341 |
| H  | -6.4941486 | 3.7323115  | -3.2889749 |
| C  | -6.9680518 | 2.9709815  | -2.6708192 |
| H  | -8.8242954 | 2.9978298  | -3.7717316 |
| C  | -8.2766660 | 2.5622794  | -2.9368996 |
| C  | -6.2673643 | 2.4125452  | -1.6010050 |
| H  | -5.2666332 | 2.7725244  | -1.3582894 |
| H  | -4.2651142 | 2.9660249  | 1.3860070  |
| C  | -8.8886542 | 1.6058860  | -2.1226640 |
| C  | -6.8670963 | 1.4229068  | -0.8003468 |
| H  | -9.9151294 | 1.2982270  | -2.3186674 |
| P  | -5.9170771 | 0.7705409  | 0.6043219  |
| C  | -8.1910186 | 1.0390848  | -1.0550190 |
| C  | -5.1420580 | 3.0038762  | 2.0305993  |
| H  | -6.5213134 | -0.4182682 | 3.2579633  |
| H  | -4.5104955 | 4.7754633  | 3.0773231  |
| C  | -6.7852379 | -1.1376874 | 2.4852261  |
| C  | -5.2817784 | 4.0126755  | 2.9808625  |
| C  | -6.1240382 | 2.0104296  | 1.9117322  |
| C  | -6.7122855 | -0.7737831 | 1.1333693  |
| H  | -8.6779300 | 0.2977995  | -0.4235739 |
| C  | -7.2013505 | -2.4200882 | 2.8468044  |
| H  | -7.2468613 | -2.6953842 | 3.8997388  |
| C  | -7.0614856 | -1.7140249 | 0.1492344  |
| C  | -6.4047563 | 4.0379981  | 3.8120398  |
| C  | -7.5637423 | -3.3424989 | 1.8645111  |
| C  | -7.2671678 | 2.0557312  | 2.7234984  |
| H  | -6.9790607 | -1.4543484 | -0.9067026 |
| C  | -7.5000194 | -2.9843142 | 0.5145452  |
| C  | -7.3991449 | 3.0650794  | 3.6775834  |
| H  | -6.5109848 | 4.8227705  | 4.5602861  |
| H  | -7.8941803 | -4.3407135 | 2.1488581  |
| H  | -8.0533570 | 1.3099580  | 2.6115638  |
| H  | -7.7819286 | -3.7010092 | -0.2560853 |
| H  | -8.2831497 | 3.0951496  | 4.3136222  |
| Ga | -3.9126457 | 0.3934621  | -2.0044267 |

SCF energy GEOOPT = -4036.546666519 H

ZPE = 1426. kJ/mol

FREEH energy = 1520.35 kJ/mol

FREEH entropy = 0.94993 kJ/mol/K

\$vibrational spectrum

| # | mode | symmetry | wave number | IR intensity | selection rules |
|---|------|----------|-------------|--------------|-----------------|
|---|------|----------|-------------|--------------|-----------------|

| #  |   | cm**(-1) | km/mol    | IR  | RAMAN |
|----|---|----------|-----------|-----|-------|
| 1  |   | -0.00    | 0.00000   | -   | -     |
| 2  |   | 0.00     | 0.00000   | -   | -     |
| 3  |   | 0.00     | 0.00000   | -   | -     |
| 4  |   | 0.00     | 0.00000   | -   | -     |
| 5  |   | 0.00     | 0.00000   | -   | -     |
| 6  |   | 0.00     | 0.00000   | -   | -     |
| 7  | a | 14.69    | 0.01374   | YES | YES   |
| 8  | a | 26.48    | 0.10898   | YES | YES   |
| 9  | a | 30.82    | 0.04512   | YES | YES   |
| 10 | a | 37.82    | 0.02867   | YES | YES   |
| 11 | a | 38.81    | 0.05687   | YES | YES   |
| 12 | a | 41.29    | 0.02648   | YES | YES   |
| 13 | a | 44.29    | 0.10315   | YES | YES   |
| 14 | a | 48.89    | 0.07173   | YES | YES   |
| 15 | a | 53.30    | 0.09828   | YES | YES   |
| 16 | a | 62.08    | 0.18585   | YES | YES   |
| 17 | a | 65.35    | 0.00546   | YES | YES   |
| 18 | a | 70.60    | 0.49984   | YES | YES   |
| 19 | a | 73.27    | 0.08187   | YES | YES   |
| 20 | a | 82.85    | 0.31655   | YES | YES   |
| 21 | a | 86.40    | 0.12640   | YES | YES   |
| 22 | a | 98.16    | 0.41758   | YES | YES   |
| 23 | a | 109.10   | 1.32296   | YES | YES   |
| 24 | a | 117.46   | 0.24439   | YES | YES   |
| 25 | a | 125.36   | 2.16516   | YES | YES   |
| 26 | a | 142.59   | 2.22254   | YES | YES   |
| 27 | a | 186.43   | 0.30460   | YES | YES   |
| 28 | a | 194.29   | 5.00370   | YES | YES   |
| 29 | a | 195.15   | 2.63346   | YES | YES   |
| 30 | a | 204.57   | 6.40551   | YES | YES   |
| 31 | a | 221.25   | 0.88636   | YES | YES   |
| 32 | a | 228.16   | 0.35095   | YES | YES   |
| 33 | a | 232.92   | 1.18290   | YES | YES   |
| 34 | a | 239.32   | 5.50095   | YES | YES   |
| 35 | a | 243.25   | 0.91883   | YES | YES   |
| 36 | a | 251.89   | 0.32167   | YES | YES   |
| 37 | a | 258.73   | 0.16254   | YES | YES   |
| 38 | a | 270.01   | 0.32843   | YES | YES   |
| 39 | a | 275.57   | 1.07540   | YES | YES   |
| 40 | a | 347.28   | 5.67538   | YES | YES   |
| 41 | a | 380.84   | 18.87157  | YES | YES   |
| 42 | a | 385.02   | 0.87088   | YES | YES   |
| 43 | a | 392.85   | 0.15507   | YES | YES   |
| 44 | a | 396.52   | 0.19859   | YES | YES   |
| 45 | a | 400.59   | 0.59198   | YES | YES   |
| 46 | a | 402.75   | 0.11872   | YES | YES   |
| 47 | a | 406.26   | 0.04239   | YES | YES   |
| 48 | a | 424.09   | 3.60913   | YES | YES   |
| 49 | a | 429.08   | 2.37971   | YES | YES   |
| 50 | a | 443.27   | 0.95121   | YES | YES   |
| 51 | a | 453.33   | 3.39086   | YES | YES   |
| 52 | a | 472.46   | 0.79241   | YES | YES   |
| 53 | a | 496.18   | 30.51158  | YES | YES   |
| 54 | a | 497.32   | 85.37066  | YES | YES   |
| 55 | a | 508.93   | 21.82243  | YES | YES   |
| 56 | a | 516.23   | 17.50158  | YES | YES   |
| 57 | a | 526.03   | 133.46422 | YES | YES   |

|     |   |         |           |     |     |
|-----|---|---------|-----------|-----|-----|
| 58  | a | 554.89  | 24.89149  | YES | YES |
| 59  | a | 612.52  | 0.08077   | YES | YES |
| 60  | a | 613.35  | 0.44455   | YES | YES |
| 61  | a | 613.94  | 0.77318   | YES | YES |
| 62  | a | 614.15  | 0.50558   | YES | YES |
| 63  | a | 615.11  | 1.10245   | YES | YES |
| 64  | a | 616.01  | 0.74802   | YES | YES |
| 65  | a | 671.88  | 33.77614  | YES | YES |
| 66  | a | 680.71  | 0.24253   | YES | YES |
| 67  | a | 690.30  | 109.56060 | YES | YES |
| 68  | a | 693.58  | 3.47993   | YES | YES |
| 69  | a | 695.06  | 13.69313  | YES | YES |
| 70  | a | 696.69  | 14.31132  | YES | YES |
| 71  | a | 698.17  | 13.85597  | YES | YES |
| 72  | a | 702.05  | 13.18189  | YES | YES |
| 73  | a | 709.11  | 3.61357   | YES | YES |
| 74  | a | 711.80  | 4.32526   | YES | YES |
| 75  | a | 715.32  | 21.38647  | YES | YES |
| 76  | a | 718.63  | 50.71467  | YES | YES |
| 77  | a | 734.18  | 88.44708  | YES | YES |
| 78  | a | 736.37  | 31.72663  | YES | YES |
| 79  | a | 739.61  | 7.75154   | YES | YES |
| 80  | a | 741.80  | 24.92408  | YES | YES |
| 81  | a | 744.14  | 1.83551   | YES | YES |
| 82  | a | 745.22  | 14.38676  | YES | YES |
| 83  | a | 775.18  | 243.71746 | YES | YES |
| 84  | a | 833.40  | 0.15068   | YES | YES |
| 85  | a | 838.52  | 1.19316   | YES | YES |
| 86  | a | 839.87  | 0.95574   | YES | YES |
| 87  | a | 843.14  | 0.60779   | YES | YES |
| 88  | a | 845.58  | 0.58916   | YES | YES |
| 89  | a | 847.41  | 1.95747   | YES | YES |
| 90  | a | 911.11  | 0.04436   | YES | YES |
| 91  | a | 917.89  | 0.94228   | YES | YES |
| 92  | a | 920.12  | 0.60732   | YES | YES |
| 93  | a | 920.60  | 1.25299   | YES | YES |
| 94  | a | 924.65  | 0.33359   | YES | YES |
| 95  | a | 928.64  | 0.31663   | YES | YES |
| 96  | a | 961.43  | 0.48274   | YES | YES |
| 97  | a | 964.94  | 0.59474   | YES | YES |
| 98  | a | 966.72  | 0.42662   | YES | YES |
| 99  | a | 968.34  | 0.75234   | YES | YES |
| 100 | a | 969.51  | 1.14877   | YES | YES |
| 101 | a | 971.83  | 0.51797   | YES | YES |
| 102 | a | 985.74  | 0.09569   | YES | YES |
| 103 | a | 987.44  | 0.04978   | YES | YES |
| 104 | a | 988.43  | 0.03898   | YES | YES |
| 105 | a | 989.54  | 0.04214   | YES | YES |
| 106 | a | 992.20  | 2.49003   | YES | YES |
| 107 | a | 994.39  | 6.32209   | YES | YES |
| 108 | a | 995.54  | 12.38353  | YES | YES |
| 109 | a | 996.52  | 2.72010   | YES | YES |
| 110 | a | 997.29  | 7.33628   | YES | YES |
| 111 | a | 998.04  | 9.31678   | YES | YES |
| 112 | a | 998.78  | 1.45088   | YES | YES |
| 113 | a | 1002.35 | 0.68382   | YES | YES |
| 114 | a | 1024.59 | 14.12022  | YES | YES |
| 115 | a | 1025.63 | 1.10976   | YES | YES |

|     |   |         |           |     |     |
|-----|---|---------|-----------|-----|-----|
| 116 | a | 1025.86 | 0.48441   | YES | YES |
| 117 | a | 1026.14 | 1.30590   | YES | YES |
| 118 | a | 1026.92 | 1.12195   | YES | YES |
| 119 | a | 1027.46 | 0.26911   | YES | YES |
| 120 | a | 1061.81 | 319.14056 | YES | YES |
| 121 | a | 1074.61 | 3.53177   | YES | YES |
| 122 | a | 1076.84 | 4.26710   | YES | YES |
| 123 | a | 1077.09 | 4.87014   | YES | YES |
| 124 | a | 1079.01 | 2.51519   | YES | YES |
| 125 | a | 1081.44 | 0.50862   | YES | YES |
| 126 | a | 1082.77 | 2.14943   | YES | YES |
| 127 | a | 1092.47 | 52.10579  | YES | YES |
| 128 | a | 1093.60 | 41.78812  | YES | YES |
| 129 | a | 1093.87 | 59.24879  | YES | YES |
| 130 | a | 1095.60 | 67.06644  | YES | YES |
| 131 | a | 1097.41 | 72.27293  | YES | YES |
| 132 | a | 1098.01 | 78.51407  | YES | YES |
| 133 | a | 1157.40 | 0.23737   | YES | YES |
| 134 | a | 1157.49 | 0.46690   | YES | YES |
| 135 | a | 1158.47 | 0.39383   | YES | YES |
| 136 | a | 1159.01 | 0.64725   | YES | YES |
| 137 | a | 1159.34 | 0.19213   | YES | YES |
| 138 | a | 1159.77 | 0.23095   | YES | YES |
| 139 | a | 1173.71 | 0.89886   | YES | YES |
| 140 | a | 1174.41 | 0.61561   | YES | YES |
| 141 | a | 1175.37 | 3.74838   | YES | YES |
| 142 | a | 1176.18 | 1.98111   | YES | YES |
| 143 | a | 1178.90 | 2.40330   | YES | YES |
| 144 | a | 1181.69 | 0.25181   | YES | YES |
| 145 | a | 1290.09 | 1.56771   | YES | YES |
| 146 | a | 1294.79 | 4.73188   | YES | YES |
| 147 | a | 1297.05 | 3.31437   | YES | YES |
| 148 | a | 1299.02 | 7.98669   | YES | YES |
| 149 | a | 1304.04 | 1.29071   | YES | YES |
| 150 | a | 1305.36 | 4.08995   | YES | YES |
| 151 | a | 1335.98 | 0.23612   | YES | YES |
| 152 | a | 1338.25 | 0.54079   | YES | YES |
| 153 | a | 1339.03 | 0.25745   | YES | YES |
| 154 | a | 1339.42 | 0.10610   | YES | YES |
| 155 | a | 1340.69 | 0.30608   | YES | YES |
| 156 | a | 1341.28 | 0.19972   | YES | YES |
| 157 | a | 1425.82 | 5.53328   | YES | YES |
| 158 | a | 1427.72 | 14.01627  | YES | YES |
| 159 | a | 1429.24 | 17.03144  | YES | YES |
| 160 | a | 1430.76 | 24.56656  | YES | YES |
| 161 | a | 1433.29 | 11.87498  | YES | YES |
| 162 | a | 1434.27 | 14.66782  | YES | YES |
| 163 | a | 1469.48 | 5.42528   | YES | YES |
| 164 | a | 1470.30 | 4.77432   | YES | YES |
| 165 | a | 1470.91 | 5.14864   | YES | YES |
| 166 | a | 1471.70 | 3.92627   | YES | YES |
| 167 | a | 1474.10 | 14.70260  | YES | YES |
| 168 | a | 1474.72 | 3.85746   | YES | YES |
| 169 | a | 1566.85 | 0.59452   | YES | YES |
| 170 | a | 1567.48 | 0.09628   | YES | YES |
| 171 | a | 1569.58 | 0.29375   | YES | YES |
| 172 | a | 1570.51 | 0.03150   | YES | YES |
| 173 | a | 1572.02 | 0.36570   | YES | YES |



|     |   |         |          |     |     |
|-----|---|---------|----------|-----|-----|
| 174 | a | 1572.71 | 0.31280  | YES | YES |
| 175 | a | 1581.41 | 0.08300  | YES | YES |
| 176 | a | 1581.58 | 1.52755  | YES | YES |
| 177 | a | 1583.82 | 0.26093  | YES | YES |
| 178 | a | 1584.39 | 0.26642  | YES | YES |
| 179 | a | 1585.22 | 2.40727  | YES | YES |
| 180 | a | 1585.81 | 0.51960  | YES | YES |
| 181 | a | 3090.81 | 4.83915  | YES | YES |
| 182 | a | 3094.64 | 1.68789  | YES | YES |
| 183 | a | 3096.89 | 2.89319  | YES | YES |
| 184 | a | 3102.83 | 0.76597  | YES | YES |
| 185 | a | 3105.83 | 0.28058  | YES | YES |
| 186 | a | 3106.90 | 0.05388  | YES | YES |
| 187 | a | 3109.62 | 0.12630  | YES | YES |
| 188 | a | 3110.04 | 1.43694  | YES | YES |
| 189 | a | 3111.14 | 0.13664  | YES | YES |
| 190 | a | 3111.90 | 0.02995  | YES | YES |
| 191 | a | 3112.28 | 0.13929  | YES | YES |
| 192 | a | 3112.59 | 0.38680  | YES | YES |
| 193 | a | 3116.52 | 0.42602  | YES | YES |
| 194 | a | 3117.38 | 0.92136  | YES | YES |
| 195 | a | 3118.39 | 1.26263  | YES | YES |
| 196 | a | 3119.28 | 0.79939  | YES | YES |
| 197 | a | 3120.03 | 0.91141  | YES | YES |
| 198 | a | 3120.10 | 0.61286  | YES | YES |
| 199 | a | 3125.02 | 2.75561  | YES | YES |
| 200 | a | 3125.29 | 13.40074 | YES | YES |
| 201 | a | 3125.76 | 2.23021  | YES | YES |
| 202 | a | 3126.56 | 5.54471  | YES | YES |
| 203 | a | 3127.35 | 3.31869  | YES | YES |
| 204 | a | 3127.41 | 5.39217  | YES | YES |
| 205 | a | 3132.63 | 6.00645  | YES | YES |
| 206 | a | 3133.02 | 7.83002  | YES | YES |
| 207 | a | 3133.38 | 8.54069  | YES | YES |
| 208 | a | 3134.02 | 6.92951  | YES | YES |
| 209 | a | 3134.93 | 7.63229  | YES | YES |
| 210 | a | 3135.19 | 5.76313  | YES | YES |

§end

COSMO energy + OC correction = -4036.5968923039 H

### 8.10 $[\{\text{In}(\text{CDP}^{\text{Ph}})\}_2]^{2+}$

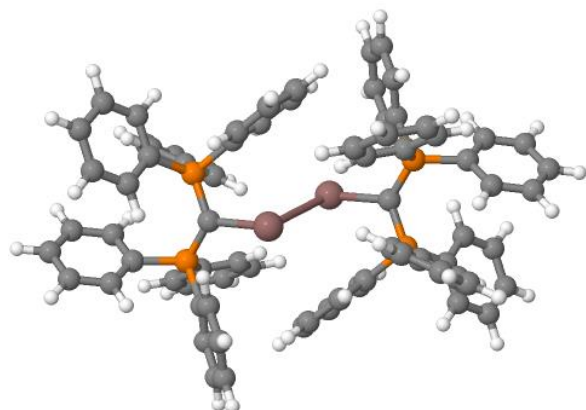

Method: (RI-)BP86(D3BJ)/def2-TZVPP

Symmetry: ci

Cartesian coordinates in Ångström:

|    |            |            |            |
|----|------------|------------|------------|
| In | -1.5451500 | 0.5760388  | 0.6120474  |
| P  | -1.9599960 | 2.3319926  | -2.2431605 |
| C  | -2.5568171 | 0.9827404  | -1.3824534 |
| P  | -3.6610996 | -0.1203017 | -2.0783595 |
| C  | -0.5216604 | 2.9660805  | -1.3170125 |
| C  | -0.7685129 | 3.7225450  | -0.1549433 |
| H  | -1.7932785 | 3.9818436  | 0.1142391  |
| C  | 0.2971122  | 4.1863705  | 0.6183669  |
| H  | 0.1012867  | 4.7894405  | 1.5035125  |
| C  | 1.6112308  | 3.8932150  | 0.2470873  |
| H  | 2.4409265  | 4.2556314  | 0.8512553  |
| C  | 1.8624739  | 3.1485432  | -0.9065172 |
| H  | 2.8875693  | 2.9390088  | -1.2085895 |
| C  | 0.8015624  | 2.6893924  | -1.6914050 |
| H  | 1.0049965  | 2.1436351  | -2.6109318 |
| C  | -1.3944168 | 1.9671130  | -3.9294170 |
| C  | -1.8306678 | 2.6863820  | -5.0522894 |
| H  | -2.4985153 | 3.5372877  | -4.9316567 |
| C  | -1.4323049 | 2.2923632  | -6.3307330 |
| H  | -1.7794398 | 2.8509911  | -7.1991407 |
| C  | -0.5995947 | 1.1831730  | -6.4982329 |
| H  | -0.2976506 | 0.8755379  | -7.4986938 |
| C  | -0.1588473 | 0.4660799  | -5.3823034 |
| H  | 0.4825553  | -0.4053244 | -5.5074013 |
| C  | -0.5544832 | 0.8541122  | -4.1046198 |
| H  | -0.2321724 | 0.2788272  | -3.2374734 |
| C  | -3.0714555 | 3.7606625  | -2.3293665 |
| C  | -4.3747248 | 3.6620944  | -1.8305974 |
| H  | -4.7103916 | 2.7240786  | -1.3940471 |
| C  | -5.2312452 | 4.7616917  | -1.8945439 |
| H  | -6.2483555 | 4.6775862  | -1.5140085 |
| C  | -4.7825870 | 5.9652988  | -2.4423022 |
| H  | -5.4510209 | 6.8241341  | -2.4920659 |
| C  | -3.4704958 | 6.0764632  | -2.9158141 |
| H  | -3.1157335 | 7.0209983  | -3.3264523 |
| C  | -2.6127085 | 4.9795302  | -2.8582380 |
| H  | -1.5862599 | 5.0736840  | -3.2145942 |
| C  | -2.8971370 | -1.3210940 | -3.2106340 |
| C  | -3.5113859 | -1.7334224 | -4.4018340 |
| H  | -4.4945479 | -1.3519598 | -4.6717533 |
| C  | -2.8570464 | -2.6301549 | -5.2494866 |
| H  | -3.3336400 | -2.9390244 | -6.1789702 |
| C  | -1.5977987 | -3.1280863 | -4.9079709 |
| H  | -1.0876540 | -3.8217195 | -5.5755682 |
| C  | -0.9951393 | -2.7377472 | -3.7081754 |
| H  | -0.0132324 | -3.1237829 | -3.4357750 |
| C  | -1.6410944 | -1.8387033 | -2.8646296 |
| H  | -1.1582510 | -1.5118802 | -1.9425765 |
| C  | -5.0492315 | 0.6242065  | -2.9766034 |
| C  | -6.3118895 | 0.7326643  | -2.3747671 |
| H  | -6.5069223 | 0.2502847  | -1.4178391 |
| C  | -7.3224719 | 1.4633022  | -3.0018723 |
| H  | -8.3025080 | 1.5413269  | -2.5326199 |
| C  | -7.0807854 | 2.0866348  | -4.2282377 |
| H  | -7.8705482 | 2.6589173  | -4.7132988 |

|    |            |            |            |
|----|------------|------------|------------|
| C  | -5.8296492 | 1.9644793  | -4.8395323 |
| H  | -5.6427640 | 2.4370255  | -5.8031288 |
| C  | -4.8170628 | 1.2356777  | -4.2200889 |
| H  | -3.8452127 | 1.1459738  | -4.7019215 |
| C  | -4.3943763 | -1.1114926 | -0.7436817 |
| C  | -4.7637935 | -2.4443939 | -0.9735869 |
| H  | -4.5722137 | -2.8998971 | -1.9446169 |
| C  | -5.3742298 | -3.1852918 | 0.0390927  |
| H  | -5.6627451 | -4.2194294 | -0.1456238 |
| C  | -5.6149615 | -2.6045077 | 1.2885998  |
| H  | -6.0896868 | -3.1871374 | 2.0771799  |
| C  | -5.2591276 | -1.2733895 | 1.5209279  |
| H  | -5.4638096 | -0.8120973 | 2.4863230  |
| C  | -4.6601883 | -0.5244193 | 0.5051385  |
| H  | -4.4355766 | 0.5317308  | 0.6618174  |
| In | 1.5451500  | -0.5760388 | -0.6120474 |
| P  | 1.9599960  | -2.3319926 | 2.2431605  |
| C  | 2.5568171  | -0.9827404 | 1.3824534  |
| P  | 3.6610996  | 0.1203017  | 2.0783595  |
| C  | 0.5216604  | -2.9660805 | 1.3170125  |
| C  | 0.7685129  | -3.7225450 | 0.1549433  |
| H  | 1.7932785  | -3.9818436 | -0.1142391 |
| C  | -0.2971122 | -4.1863705 | -0.6183669 |
| H  | -0.1012867 | -4.7894405 | -1.5035125 |
| C  | -1.6112308 | -3.8932150 | -0.2470873 |
| H  | -2.4409265 | -4.2556314 | -0.8512553 |
| C  | -1.8624739 | -3.1485432 | 0.9065172  |
| H  | -2.8875693 | -2.9390088 | 1.2085895  |
| C  | -0.8015624 | -2.6893924 | 1.6914050  |
| H  | -1.0049965 | -2.1436351 | 2.6109318  |
| C  | 1.3944168  | -1.9671130 | 3.9294170  |
| C  | 1.8306678  | -2.6863820 | 5.0522894  |
| H  | 2.4985153  | -3.5372877 | 4.9316567  |
| C  | 1.4323049  | -2.2923632 | 6.3307330  |
| H  | 1.7794398  | -2.8509911 | 7.1991407  |
| C  | 0.5995947  | -1.1831730 | 6.4982329  |
| H  | 0.2976506  | -0.8755379 | 7.4986938  |
| C  | 0.1588473  | -0.4660799 | 5.3823034  |
| H  | -0.4825553 | 0.4053244  | 5.5074013  |
| C  | 0.5544832  | -0.8541122 | 4.1046198  |
| H  | 0.2321724  | -0.2788272 | 3.2374734  |
| C  | 3.0714555  | -3.7606625 | 2.3293665  |
| C  | 4.3747248  | -3.6620944 | 1.8305974  |
| H  | 4.7103916  | -2.7240786 | 1.3940471  |
| C  | 5.2312452  | -4.7616917 | 1.8945439  |
| H  | 6.2483555  | -4.6775862 | 1.5140085  |
| C  | 4.7825870  | -5.9652988 | 2.4423022  |
| H  | 5.4510209  | -6.8241341 | 2.4920659  |
| C  | 3.4704958  | -6.0764632 | 2.9158141  |
| H  | 3.1157335  | -7.0209983 | 3.3264523  |
| C  | 2.6127085  | -4.9795302 | 2.8582380  |
| H  | 1.5862599  | -5.0736840 | 3.2145942  |
| C  | 2.8971370  | 1.3210940  | 3.2106340  |
| C  | 3.5113859  | 1.7334224  | 4.4018340  |
| H  | 4.4945479  | 1.3519598  | 4.6717533  |
| C  | 2.8570464  | 2.6301549  | 5.2494866  |
| H  | 3.3336400  | 2.9390244  | 6.1789702  |
| C  | 1.5977987  | 3.1280863  | 4.9079709  |

|   |           |            |            |
|---|-----------|------------|------------|
| H | 1.0876540 | 3.8217195  | 5.5755682  |
| C | 0.9951393 | 2.7377472  | 3.7081754  |
| H | 0.0132324 | 3.1237829  | 3.4357750  |
| C | 1.6410944 | 1.8387033  | 2.8646296  |
| H | 1.1582510 | 1.5118802  | 1.9425765  |
| C | 5.0492315 | -0.6242065 | 2.9766034  |
| C | 6.3118895 | -0.7326643 | 2.3747671  |
| H | 6.5069223 | -0.2502847 | 1.4178391  |
| C | 7.3224719 | -1.4633022 | 3.0018723  |
| H | 8.3025080 | -1.5413269 | 2.5326199  |
| C | 7.0807854 | -2.0866348 | 4.2282377  |
| H | 7.8705482 | -2.6589173 | 4.7132988  |
| C | 5.8296492 | -1.9644793 | 4.8395323  |
| H | 5.6427640 | -2.4370255 | 5.8031288  |
| C | 4.8170628 | -1.2356777 | 4.2200889  |
| H | 3.8452127 | -1.1459738 | 4.7019215  |
| C | 4.3943763 | 1.1114926  | 0.7436817  |
| C | 4.7637935 | 2.4443939  | 0.9735869  |
| H | 4.5722137 | 2.8998971  | 1.9446169  |
| C | 5.3742298 | 3.1852918  | -0.0390927 |
| H | 5.6627451 | 4.2194294  | 0.1456238  |
| C | 5.6149615 | 2.6045077  | -1.2885998 |
| H | 6.0896868 | 3.1871374  | -2.0771799 |
| C | 5.2591276 | 1.2733895  | -1.5209279 |
| H | 5.4638096 | 0.8120973  | -2.4863230 |
| C | 4.6601883 | 0.5244193  | -0.5051385 |
| H | 4.4355766 | -0.5317308 | -0.6618174 |

SCF energy GEOOPT = -4603.391736262 H

ZPE = 2854. kJ/mol

FREEH energy = 3048.90 kJ/mol

FREEH entropy = 1.71036 kJ/mol/K

\$vibrational spectrum

| # | mode | symmetry | wave number<br>cm**(-1) | IR intensity<br>km/mol | selection rules |       |
|---|------|----------|-------------------------|------------------------|-----------------|-------|
| # |      |          |                         |                        | IR              | RAMAN |
|   | 1    |          | -0.00                   | 0.00000                | -               | -     |
|   | 2    |          | -0.00                   | 0.00000                | -               | -     |
|   | 3    |          | -0.00                   | 0.00000                | -               | -     |
|   | 4    |          | 0.00                    | 0.00000                | -               | -     |
|   | 5    |          | 0.00                    | 0.00000                | -               | -     |
|   | 6    |          | 0.00                    | 0.00000                | -               | -     |
|   | 7    | au       | 12.53                   | 0.01474                | YES             | NO    |
|   | 8    | au       | 14.84                   | 0.17098                | YES             | NO    |
|   | 9    | ag       | 14.94                   | 0.00000                | NO              | YES   |
|   | 10   | au       | 17.71                   | 0.06440                | YES             | NO    |
|   | 11   | ag       | 22.34                   | 0.00000                | NO              | YES   |
|   | 12   | au       | 24.82                   | 0.07638                | YES             | NO    |
|   | 13   | ag       | 24.87                   | 0.00000                | NO              | YES   |
|   | 14   | au       | 28.60                   | 0.05426                | YES             | NO    |
|   | 15   | ag       | 31.21                   | 0.00000                | NO              | YES   |
|   | 16   | ag       | 34.45                   | 0.00000                | NO              | YES   |
|   | 17   | au       | 35.06                   | 0.14917                | YES             | NO    |
|   | 18   | ag       | 40.16                   | 0.00000                | NO              | YES   |
|   | 19   | au       | 40.37                   | 0.12561                | YES             | NO    |
|   | 20   | ag       | 43.96                   | 0.00000                | NO              | YES   |
|   | 21   | au       | 45.81                   | 0.13191                | YES             | NO    |
|   | 22   | ag       | 46.84                   | 0.00000                | NO              | YES   |

|    |    |        |          |     |     |
|----|----|--------|----------|-----|-----|
| 23 | au | 51.04  | 0.15768  | YES | NO  |
| 24 | ag | 52.11  | 0.00000  | NO  | YES |
| 25 | ag | 52.73  | 0.00000  | NO  | YES |
| 26 | au | 54.83  | 0.26565  | YES | NO  |
| 27 | au | 56.13  | 0.03331  | YES | NO  |
| 28 | ag | 60.54  | 0.00000  | NO  | YES |
| 29 | ag | 63.00  | 0.00000  | NO  | YES |
| 30 | au | 63.29  | 0.27864  | YES | NO  |
| 31 | au | 64.92  | 0.08943  | YES | NO  |
| 32 | au | 68.27  | 0.23673  | YES | NO  |
| 33 | ag | 68.78  | 0.00000  | NO  | YES |
| 34 | ag | 78.94  | 0.00000  | NO  | YES |
| 35 | au | 80.54  | 0.55818  | YES | NO  |
| 36 | ag | 81.76  | 0.00000  | NO  | YES |
| 37 | au | 84.13  | 1.51277  | YES | NO  |
| 38 | ag | 85.83  | 0.00000  | NO  | YES |
| 39 | ag | 87.80  | 0.00000  | NO  | YES |
| 40 | au | 87.87  | 0.31880  | YES | NO  |
| 41 | au | 91.59  | 1.10499  | YES | NO  |
| 42 | ag | 92.77  | 0.00000  | NO  | YES |
| 43 | au | 98.77  | 0.61330  | YES | NO  |
| 44 | ag | 101.23 | 0.00000  | NO  | YES |
| 45 | au | 104.25 | 0.50226  | YES | NO  |
| 46 | ag | 106.38 | 0.00000  | NO  | YES |
| 47 | ag | 110.56 | 0.00000  | NO  | YES |
| 48 | au | 112.83 | 1.95718  | YES | NO  |
| 49 | ag | 120.75 | 0.00000  | NO  | YES |
| 50 | au | 122.92 | 1.32249  | YES | NO  |
| 51 | au | 131.58 | 8.50808  | YES | NO  |
| 52 | ag | 134.70 | 0.00000  | NO  | YES |
| 53 | ag | 191.24 | 0.00000  | NO  | YES |
| 54 | au | 191.49 | 16.40260 | YES | NO  |
| 55 | au | 195.90 | 7.86755  | YES | NO  |
| 56 | ag | 196.00 | 0.00000  | NO  | YES |
| 57 | ag | 199.94 | 0.00000  | NO  | YES |
| 58 | au | 200.94 | 2.33876  | YES | NO  |
| 59 | au | 204.13 | 3.34456  | YES | NO  |
| 60 | ag | 204.95 | 0.00000  | NO  | YES |
| 61 | au | 216.35 | 3.72829  | YES | NO  |
| 62 | ag | 218.45 | 0.00000  | NO  | YES |
| 63 | ag | 226.29 | 0.00000  | NO  | YES |
| 64 | au | 228.60 | 4.29822  | YES | NO  |
| 65 | ag | 229.62 | 0.00000  | NO  | YES |
| 66 | au | 230.09 | 3.69843  | YES | NO  |
| 67 | ag | 245.12 | 0.00000  | NO  | YES |
| 68 | au | 245.91 | 4.45786  | YES | NO  |
| 69 | au | 248.11 | 2.01955  | YES | NO  |
| 70 | ag | 248.56 | 0.00000  | NO  | YES |
| 71 | au | 253.70 | 0.49158  | YES | NO  |
| 72 | ag | 254.11 | 0.00000  | NO  | YES |
| 73 | au | 257.46 | 0.82830  | YES | NO  |
| 74 | ag | 257.60 | 0.00000  | NO  | YES |
| 75 | au | 270.75 | 2.13308  | YES | NO  |
| 76 | ag | 271.00 | 0.00000  | NO  | YES |
| 77 | ag | 272.48 | 0.00000  | NO  | YES |
| 78 | au | 272.58 | 1.56478  | YES | NO  |
| 79 | au | 337.00 | 18.76203 | YES | NO  |
| 80 | ag | 337.22 | 0.00000  | NO  | YES |

|     |    |        |           |     |     |
|-----|----|--------|-----------|-----|-----|
| 81  | ag | 379.74 | 0.00000   | NO  | YES |
| 82  | au | 380.33 | 29.62033  | YES | NO  |
| 83  | ag | 388.23 | 0.00000   | NO  | YES |
| 84  | au | 388.66 | 0.52053   | YES | NO  |
| 85  | au | 394.45 | 0.61299   | YES | NO  |
| 86  | ag | 394.54 | 0.00000   | NO  | YES |
| 87  | ag | 395.44 | 0.00000   | NO  | YES |
| 88  | au | 395.46 | 0.06642   | YES | NO  |
| 89  | au | 398.95 | 1.56690   | YES | NO  |
| 90  | ag | 399.53 | 0.00000   | NO  | YES |
| 91  | au | 402.57 | 0.22894   | YES | NO  |
| 92  | ag | 403.38 | 0.00000   | NO  | YES |
| 93  | ag | 408.04 | 0.00000   | NO  | YES |
| 94  | au | 408.60 | 0.55335   | YES | NO  |
| 95  | au | 426.52 | 3.90335   | YES | NO  |
| 96  | ag | 426.85 | 0.00000   | NO  | YES |
| 97  | ag | 432.56 | 0.00000   | NO  | YES |
| 98  | au | 433.22 | 14.44903  | YES | NO  |
| 99  | au | 444.59 | 5.64089   | YES | NO  |
| 100 | ag | 444.64 | 0.00000   | NO  | YES |
| 101 | ag | 453.35 | 0.00000   | NO  | YES |
| 102 | au | 454.12 | 6.79029   | YES | NO  |
| 103 | ag | 465.16 | 0.00000   | NO  | YES |
| 104 | au | 465.64 | 7.06038   | YES | NO  |
| 105 | au | 495.15 | 60.08563  | YES | NO  |
| 106 | ag | 496.60 | 0.00000   | NO  | YES |
| 107 | ag | 502.59 | 0.00000   | NO  | YES |
| 108 | au | 504.04 | 101.77362 | YES | NO  |
| 109 | ag | 508.64 | 0.00000   | NO  | YES |
| 110 | au | 508.83 | 77.86719  | YES | NO  |
| 111 | ag | 516.17 | 0.00000   | NO  | YES |
| 112 | au | 516.48 | 9.10303   | YES | NO  |
| 113 | ag | 521.50 | 0.00000   | NO  | YES |
| 114 | au | 521.85 | 238.71422 | YES | NO  |
| 115 | au | 553.51 | 16.51472  | YES | NO  |
| 116 | ag | 554.27 | 0.00000   | NO  | YES |
| 117 | ag | 613.10 | 0.00000   | NO  | YES |
| 118 | au | 613.23 | 0.29445   | YES | NO  |
| 119 | ag | 613.99 | 0.00000   | NO  | YES |
| 120 | au | 613.99 | 0.39322   | YES | NO  |
| 121 | au | 614.21 | 0.30655   | YES | NO  |
| 122 | ag | 614.23 | 0.00000   | NO  | YES |
| 123 | ag | 614.64 | 0.00000   | NO  | YES |
| 124 | au | 614.68 | 0.84386   | YES | NO  |
| 125 | au | 615.09 | 1.49496   | YES | NO  |
| 126 | ag | 615.72 | 0.00000   | NO  | YES |
| 127 | ag | 615.82 | 0.00000   | NO  | YES |
| 128 | au | 616.39 | 1.24715   | YES | NO  |
| 129 | au | 673.21 | 111.05249 | YES | NO  |
| 130 | ag | 673.47 | 0.00000   | NO  | YES |
| 131 | au | 681.57 | 1.49954   | YES | NO  |
| 132 | ag | 681.71 | 0.00000   | NO  | YES |
| 133 | ag | 691.43 | 0.00000   | NO  | YES |
| 134 | au | 692.14 | 148.20095 | YES | NO  |
| 135 | au | 694.38 | 16.11469  | YES | NO  |
| 136 | ag | 694.82 | 0.00000   | NO  | YES |
| 137 | au | 695.38 | 43.28800  | YES | NO  |
| 138 | ag | 695.51 | 0.00000   | NO  | YES |

|     |    |        |           |     |     |
|-----|----|--------|-----------|-----|-----|
| 139 | ag | 696.33 | 0.00000   | NO  | YES |
| 140 | au | 696.39 | 57.18057  | YES | NO  |
| 141 | ag | 700.36 | 0.00000   | NO  | YES |
| 142 | au | 700.37 | 40.87937  | YES | NO  |
| 143 | au | 701.60 | 7.27921   | YES | NO  |
| 144 | ag | 701.81 | 0.00000   | NO  | YES |
| 145 | ag | 708.33 | 0.00000   | NO  | YES |
| 146 | au | 708.35 | 0.79573   | YES | NO  |
| 147 | au | 712.36 | 4.82713   | YES | NO  |
| 148 | ag | 712.65 | 0.00000   | NO  | YES |
| 149 | ag | 714.57 | 0.00000   | NO  | YES |
| 150 | au | 714.65 | 50.97741  | YES | NO  |
| 151 | au | 718.36 | 79.26658  | YES | NO  |
| 152 | ag | 718.36 | 0.00000   | NO  | YES |
| 153 | ag | 736.60 | 0.00000   | NO  | YES |
| 154 | au | 738.15 | 238.75753 | YES | NO  |
| 155 | au | 739.57 | 82.33404  | YES | NO  |
| 156 | ag | 740.39 | 0.00000   | NO  | YES |
| 157 | ag | 740.88 | 0.00000   | NO  | YES |
| 158 | au | 741.57 | 39.89458  | YES | NO  |
| 159 | au | 743.20 | 57.49259  | YES | NO  |
| 160 | ag | 745.27 | 0.00000   | NO  | YES |
| 161 | ag | 745.91 | 0.00000   | NO  | YES |
| 162 | au | 746.19 | 86.72788  | YES | NO  |
| 163 | ag | 748.30 | 0.00000   | NO  | YES |
| 164 | au | 748.45 | 10.63535  | YES | NO  |
| 165 | au | 776.29 | 905.63722 | YES | NO  |
| 166 | ag | 783.82 | 0.00000   | NO  | YES |
| 167 | ag | 836.20 | 0.00000   | NO  | YES |
| 168 | au | 837.13 | 1.21077   | YES | NO  |
| 169 | ag | 840.15 | 0.00000   | NO  | YES |
| 170 | au | 840.31 | 4.24573   | YES | NO  |
| 171 | ag | 841.78 | 0.00000   | NO  | YES |
| 172 | au | 842.36 | 0.83356   | YES | NO  |
| 173 | au | 843.54 | 3.44068   | YES | NO  |
| 174 | ag | 845.38 | 0.00000   | NO  | YES |
| 175 | ag | 848.52 | 0.00000   | NO  | YES |
| 176 | au | 849.88 | 1.15125   | YES | NO  |
| 177 | au | 850.84 | 3.48410   | YES | NO  |
| 178 | ag | 850.91 | 0.00000   | NO  | YES |
| 179 | au | 914.35 | 0.45970   | YES | NO  |
| 180 | ag | 915.14 | 0.00000   | NO  | YES |
| 181 | ag | 916.39 | 0.00000   | NO  | YES |
| 182 | au | 917.23 | 0.27948   | YES | NO  |
| 183 | au | 921.55 | 4.59942   | YES | NO  |
| 184 | ag | 921.62 | 0.00000   | NO  | YES |
| 185 | au | 922.05 | 2.05542   | YES | NO  |
| 186 | ag | 922.06 | 0.00000   | NO  | YES |
| 187 | au | 927.16 | 1.86184   | YES | NO  |
| 188 | ag | 927.30 | 0.00000   | NO  | YES |
| 189 | au | 929.80 | 2.38855   | YES | NO  |
| 190 | ag | 929.96 | 0.00000   | NO  | YES |
| 191 | ag | 962.99 | 0.00000   | NO  | YES |
| 192 | au | 963.65 | 0.35378   | YES | NO  |
| 193 | au | 965.83 | 4.09857   | YES | NO  |
| 194 | ag | 966.76 | 0.00000   | NO  | YES |
| 195 | au | 967.86 | 0.54471   | YES | NO  |
| 196 | ag | 968.08 | 0.00000   | NO  | YES |

|     |    |         |           |     |     |
|-----|----|---------|-----------|-----|-----|
| 197 | au | 969.61  | 0.63676   | YES | NO  |
| 198 | ag | 970.12  | 0.00000   | NO  | YES |
| 199 | ag | 972.08  | 0.00000   | NO  | YES |
| 200 | au | 972.56  | 2.08183   | YES | NO  |
| 201 | ag | 972.99  | 0.00000   | NO  | YES |
| 202 | au | 973.33  | 2.54043   | YES | NO  |
| 203 | ag | 988.37  | 0.00000   | NO  | YES |
| 204 | au | 988.46  | 1.36034   | YES | NO  |
| 205 | au | 991.53  | 0.07833   | YES | NO  |
| 206 | ag | 991.54  | 0.00000   | NO  | YES |
| 207 | ag | 992.34  | 0.00000   | NO  | YES |
| 208 | au | 992.38  | 1.11255   | YES | NO  |
| 209 | au | 992.67  | 3.20221   | YES | NO  |
| 210 | ag | 992.70  | 0.00000   | NO  | YES |
| 211 | au | 992.87  | 6.65324   | YES | NO  |
| 212 | ag | 992.93  | 0.00000   | NO  | YES |
| 213 | ag | 994.01  | 0.00000   | NO  | YES |
| 214 | au | 994.02  | 0.78669   | YES | NO  |
| 215 | au | 997.58  | 3.33161   | YES | NO  |
| 216 | ag | 997.62  | 0.00000   | NO  | YES |
| 217 | au | 998.05  | 7.66377   | YES | NO  |
| 218 | ag | 998.19  | 0.00000   | NO  | YES |
| 219 | ag | 998.34  | 0.00000   | NO  | YES |
| 220 | au | 998.40  | 23.13421  | YES | NO  |
| 221 | ag | 998.92  | 0.00000   | NO  | YES |
| 222 | au | 999.32  | 3.01470   | YES | NO  |
| 223 | ag | 1000.21 | 0.00000   | NO  | YES |
| 224 | au | 1000.21 | 12.47265  | YES | NO  |
| 225 | au | 1000.76 | 5.31393   | YES | NO  |
| 226 | ag | 1001.12 | 0.00000   | NO  | YES |
| 227 | ag | 1024.07 | 0.00000   | NO  | YES |
| 228 | au | 1024.12 | 9.22197   | YES | NO  |
| 229 | ag | 1024.85 | 0.00000   | NO  | YES |
| 230 | au | 1024.86 | 2.26871   | YES | NO  |
| 231 | ag | 1026.01 | 0.00000   | NO  | YES |
| 232 | au | 1026.10 | 0.76763   | YES | NO  |
| 233 | ag | 1026.53 | 0.00000   | NO  | YES |
| 234 | au | 1026.55 | 3.02017   | YES | NO  |
| 235 | ag | 1027.04 | 0.00000   | NO  | YES |
| 236 | au | 1027.11 | 2.38612   | YES | NO  |
| 237 | au | 1027.91 | 5.78742   | YES | NO  |
| 238 | ag | 1028.04 | 0.00000   | NO  | YES |
| 239 | ag | 1072.71 | 0.00000   | NO  | YES |
| 240 | au | 1073.56 | 164.45646 | YES | NO  |
| 241 | ag | 1074.55 | 0.00000   | NO  | YES |
| 242 | au | 1074.86 | 65.40474  | YES | NO  |
| 243 | ag | 1076.44 | 0.00000   | NO  | YES |
| 244 | ag | 1076.66 | 0.00000   | NO  | YES |
| 245 | au | 1076.71 | 37.83212  | YES | NO  |
| 246 | au | 1077.19 | 121.01155 | YES | NO  |
| 247 | au | 1077.55 | 7.29252   | YES | NO  |
| 248 | ag | 1077.84 | 0.00000   | NO  | YES |
| 249 | au | 1081.44 | 1.89336   | YES | NO  |
| 250 | ag | 1081.67 | 0.00000   | NO  | YES |
| 251 | ag | 1083.21 | 0.00000   | NO  | YES |
| 252 | au | 1083.51 | 12.87443  | YES | NO  |
| 253 | ag | 1092.30 | 0.00000   | NO  | YES |
| 254 | au | 1092.35 | 100.23512 | YES | NO  |



|     |    |         |           |     |     |
|-----|----|---------|-----------|-----|-----|
| 255 | au | 1093.84 | 76.63103  | YES | NO  |
| 256 | ag | 1094.09 | 0.00000   | NO  | YES |
| 257 | ag | 1095.78 | 0.00000   | NO  | YES |
| 258 | au | 1095.88 | 119.47299 | YES | NO  |
| 259 | au | 1096.13 | 138.47923 | YES | NO  |
| 260 | ag | 1096.30 | 0.00000   | NO  | YES |
| 261 | au | 1096.96 | 44.85714  | YES | NO  |
| 262 | ag | 1097.07 | 0.00000   | NO  | YES |
| 263 | ag | 1097.53 | 0.00000   | NO  | YES |
| 264 | au | 1099.12 | 428.78745 | YES | NO  |
| 265 | au | 1154.76 | 4.87540   | YES | NO  |
| 266 | ag | 1154.77 | 0.00000   | NO  | YES |
| 267 | ag | 1155.44 | 0.00000   | NO  | YES |
| 268 | au | 1155.54 | 0.95338   | YES | NO  |
| 269 | ag | 1158.70 | 0.00000   | NO  | YES |
| 270 | au | 1158.70 | 0.71918   | YES | NO  |
| 271 | au | 1158.80 | 1.60486   | YES | NO  |
| 272 | ag | 1158.81 | 0.00000   | NO  | YES |
| 273 | ag | 1159.05 | 0.00000   | NO  | YES |
| 274 | au | 1159.05 | 0.42621   | YES | NO  |
| 275 | ag | 1160.22 | 0.00000   | NO  | YES |
| 276 | au | 1160.22 | 1.31278   | YES | NO  |
| 277 | ag | 1173.17 | 0.00000   | NO  | YES |
| 278 | au | 1173.22 | 1.29592   | YES | NO  |
| 279 | au | 1173.89 | 2.87598   | YES | NO  |
| 280 | ag | 1173.92 | 0.00000   | NO  | YES |
| 281 | ag | 1174.79 | 0.00000   | NO  | YES |
| 282 | au | 1174.88 | 7.18584   | YES | NO  |
| 283 | ag | 1176.93 | 0.00000   | NO  | YES |
| 284 | au | 1177.02 | 6.94823   | YES | NO  |
| 285 | ag | 1179.78 | 0.00000   | NO  | YES |
| 286 | au | 1179.88 | 2.61685   | YES | NO  |
| 287 | ag | 1181.56 | 0.00000   | NO  | YES |
| 288 | au | 1181.59 | 0.76266   | YES | NO  |
| 289 | au | 1293.74 | 13.47534  | YES | NO  |
| 290 | ag | 1293.76 | 0.00000   | NO  | YES |
| 291 | au | 1295.82 | 5.12125   | YES | NO  |
| 292 | ag | 1295.85 | 0.00000   | NO  | YES |
| 293 | au | 1295.94 | 13.50284  | YES | NO  |
| 294 | ag | 1295.97 | 0.00000   | NO  | YES |
| 295 | ag | 1296.55 | 0.00000   | NO  | YES |
| 296 | au | 1296.71 | 7.98851   | YES | NO  |
| 297 | ag | 1303.52 | 0.00000   | NO  | YES |
| 298 | au | 1303.54 | 6.83792   | YES | NO  |
| 299 | ag | 1305.19 | 0.00000   | NO  | YES |
| 300 | au | 1305.21 | 8.64081   | YES | NO  |
| 301 | au | 1335.99 | 2.11849   | YES | NO  |
| 302 | ag | 1336.23 | 0.00000   | NO  | YES |
| 303 | ag | 1337.28 | 0.00000   | NO  | YES |
| 304 | au | 1337.39 | 2.19273   | YES | NO  |
| 305 | ag | 1338.00 | 0.00000   | NO  | YES |
| 306 | au | 1338.04 | 0.77220   | YES | NO  |
| 307 | ag | 1338.43 | 0.00000   | NO  | YES |
| 308 | au | 1338.45 | 0.31228   | YES | NO  |
| 309 | ag | 1340.13 | 0.00000   | NO  | YES |
| 310 | au | 1340.38 | 0.10926   | YES | NO  |
| 311 | au | 1340.92 | 1.15669   | YES | NO  |
| 312 | ag | 1341.22 | 0.00000   | NO  | YES |

|     |    |         |          |     |     |
|-----|----|---------|----------|-----|-----|
| 313 | ag | 1423.45 | 0.00000  | NO  | YES |
| 314 | au | 1423.53 | 20.40569 | YES | NO  |
| 315 | au | 1427.36 | 55.03268 | YES | NO  |
| 316 | ag | 1427.42 | 0.00000  | NO  | YES |
| 317 | ag | 1428.18 | 0.00000  | NO  | YES |
| 318 | au | 1428.21 | 17.80663 | YES | NO  |
| 319 | ag | 1429.33 | 0.00000  | NO  | YES |
| 320 | au | 1429.36 | 18.38010 | YES | NO  |
| 321 | au | 1432.33 | 51.06917 | YES | NO  |
| 322 | ag | 1432.36 | 0.00000  | NO  | YES |
| 323 | au | 1432.90 | 35.63811 | YES | NO  |
| 324 | ag | 1432.90 | 0.00000  | NO  | YES |
| 325 | au | 1469.76 | 12.41793 | YES | NO  |
| 326 | ag | 1469.78 | 0.00000  | NO  | YES |
| 327 | ag | 1470.62 | 0.00000  | NO  | YES |
| 328 | au | 1470.65 | 8.90406  | YES | NO  |
| 329 | au | 1471.25 | 20.79056 | YES | NO  |
| 330 | ag | 1471.28 | 0.00000  | NO  | YES |
| 331 | au | 1471.83 | 5.26480  | YES | NO  |
| 332 | ag | 1471.83 | 0.00000  | NO  | YES |
| 333 | au | 1472.52 | 7.41287  | YES | NO  |
| 334 | ag | 1472.53 | 0.00000  | NO  | YES |
| 335 | ag | 1473.72 | 0.00000  | NO  | YES |
| 336 | au | 1473.73 | 13.71639 | YES | NO  |
| 337 | au | 1565.18 | 0.86545  | YES | NO  |
| 338 | ag | 1565.35 | 0.00000  | NO  | YES |
| 339 | ag | 1566.45 | 0.00000  | NO  | YES |
| 340 | au | 1566.46 | 1.12824  | YES | NO  |
| 341 | ag | 1567.96 | 0.00000  | NO  | YES |
| 342 | au | 1567.98 | 1.30632  | YES | NO  |
| 343 | au | 1568.39 | 2.29166  | YES | NO  |
| 344 | ag | 1568.44 | 0.00000  | NO  | YES |
| 345 | au | 1570.39 | 2.77355  | YES | NO  |
| 346 | ag | 1570.42 | 0.00000  | NO  | YES |
| 347 | au | 1571.93 | 3.56418  | YES | NO  |
| 348 | ag | 1571.94 | 0.00000  | NO  | YES |
| 349 | au | 1579.16 | 2.41851  | YES | NO  |
| 350 | ag | 1579.29 | 0.00000  | NO  | YES |
| 351 | ag | 1580.92 | 0.00000  | NO  | YES |
| 352 | au | 1580.93 | 1.30208  | YES | NO  |
| 353 | ag | 1583.00 | 0.00000  | NO  | YES |
| 354 | au | 1583.01 | 2.46184  | YES | NO  |
| 355 | au | 1583.55 | 6.79810  | YES | NO  |
| 356 | ag | 1583.56 | 0.00000  | NO  | YES |
| 357 | ag | 1584.06 | 0.00000  | NO  | YES |
| 358 | au | 1584.06 | 6.32522  | YES | NO  |
| 359 | ag | 1584.34 | 0.00000  | NO  | YES |
| 360 | au | 1584.40 | 7.21754  | YES | NO  |
| 361 | au | 3078.59 | 4.53779  | YES | NO  |
| 362 | ag | 3078.62 | 0.00000  | NO  | YES |
| 363 | ag | 3086.23 | 0.00000  | NO  | YES |
| 364 | au | 3086.25 | 8.54070  | YES | NO  |
| 365 | ag | 3096.02 | 0.00000  | NO  | YES |
| 366 | au | 3096.02 | 0.62633  | YES | NO  |
| 367 | ag | 3097.88 | 0.00000  | NO  | YES |
| 368 | au | 3097.88 | 3.65549  | YES | NO  |
| 369 | ag | 3099.03 | 0.00000  | NO  | YES |
| 370 | au | 3099.03 | 3.12149  | YES | NO  |

|     |    |         |          |     |     |
|-----|----|---------|----------|-----|-----|
| 371 | ag | 3108.07 | 0.00000  | NO  | YES |
| 372 | au | 3108.08 | 6.98309  | YES | NO  |
| 373 | au | 3108.97 | 0.31808  | YES | NO  |
| 374 | ag | 3108.97 | 0.00000  | NO  | YES |
| 375 | ag | 3109.30 | 0.00000  | NO  | YES |
| 376 | au | 3109.30 | 0.53530  | YES | NO  |
| 377 | au | 3112.18 | 0.38645  | YES | NO  |
| 378 | ag | 3112.19 | 0.00000  | NO  | YES |
| 379 | ag | 3113.26 | 0.00000  | NO  | YES |
| 380 | au | 3113.26 | 0.35948  | YES | NO  |
| 381 | ag | 3114.15 | 0.00000  | NO  | YES |
| 382 | au | 3114.15 | 0.86115  | YES | NO  |
| 383 | ag | 3115.52 | 0.00000  | NO  | YES |
| 384 | au | 3115.56 | 10.05121 | YES | NO  |
| 385 | ag | 3116.83 | 0.00000  | NO  | YES |
| 386 | au | 3116.83 | 7.28931  | YES | NO  |
| 387 | ag | 3117.24 | 0.00000  | NO  | YES |
| 388 | au | 3117.25 | 0.69035  | YES | NO  |
| 389 | au | 3119.81 | 2.56360  | YES | NO  |
| 390 | ag | 3119.81 | 0.00000  | NO  | YES |
| 391 | ag | 3121.61 | 0.00000  | NO  | YES |
| 392 | au | 3121.63 | 2.88031  | YES | NO  |
| 393 | au | 3122.42 | 1.67085  | YES | NO  |
| 394 | ag | 3122.43 | 0.00000  | NO  | YES |
| 395 | ag | 3122.50 | 0.00000  | NO  | YES |
| 396 | au | 3122.50 | 4.31635  | YES | NO  |
| 397 | ag | 3125.01 | 0.00000  | NO  | YES |
| 398 | au | 3125.01 | 3.95493  | YES | NO  |
| 399 | au | 3125.11 | 7.88665  | YES | NO  |
| 400 | ag | 3125.11 | 0.00000  | NO  | YES |
| 401 | ag | 3127.00 | 0.00000  | NO  | YES |
| 402 | au | 3127.00 | 2.44146  | YES | NO  |
| 403 | au | 3127.67 | 2.88906  | YES | NO  |
| 404 | ag | 3127.68 | 0.00000  | NO  | YES |
| 405 | ag | 3128.66 | 0.00000  | NO  | YES |
| 406 | au | 3128.66 | 1.23295  | YES | NO  |
| 407 | au | 3131.19 | 5.11343  | YES | NO  |
| 408 | ag | 3131.19 | 0.00000  | NO  | YES |
| 409 | au | 3133.81 | 7.36819  | YES | NO  |
| 410 | ag | 3133.81 | 0.00000  | NO  | YES |
| 411 | ag | 3134.32 | 0.00000  | NO  | YES |
| 412 | au | 3134.32 | 2.03698  | YES | NO  |
| 413 | ag | 3134.36 | 0.00000  | NO  | YES |
| 414 | au | 3134.37 | 14.12113 | YES | NO  |
| 415 | au | 3134.80 | 16.83055 | YES | NO  |
| 416 | ag | 3134.81 | 0.00000  | NO  | YES |
| 417 | au | 3136.53 | 11.48316 | YES | NO  |
| 418 | ag | 3136.54 | 0.00000  | NO  | YES |
| 419 | ag | 3137.51 | 0.00000  | NO  | YES |
| 420 | au | 3137.53 | 7.03244  | YES | NO  |

\$end

COSMO energy + OC correction = -4603.5331395537 H

## 8.11 [In(CDP<sup>Ph</sup>)]<sup>+</sup>

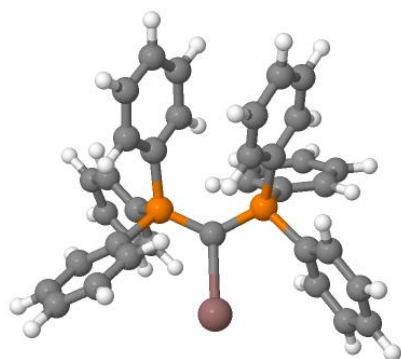

Method: (RI-)BP86(D3BJ)/def2-TZVPP

Symmetry: c1

Cartesian coordinates in Ångström:

|    |            |            |            |
|----|------------|------------|------------|
| P  | 0.1950589  | -0.0447226 | -1.5431635 |
| In | -3.1805405 | 0.8654988  | -1.1785420 |
| P  | -0.8476099 | 0.0887604  | 1.3041749  |
| C  | -1.0298980 | 0.1693831  | -0.3826407 |
| C  | 0.4111226  | -1.7576662 | -2.1163249 |
| C  | 0.4443806  | 1.1835433  | 1.9729305  |
| C  | 1.2138007  | 0.8374059  | 3.0920398  |
| H  | 1.0399086  | -0.1060582 | 3.6065923  |
| C  | 2.2259347  | 1.6909717  | 3.5330085  |
| H  | 2.8256089  | 1.4139407  | 4.3994397  |
| C  | 2.4776629  | 2.8883880  | 2.8604900  |
| H  | 3.2758621  | 3.5471691  | 3.2008566  |
| C  | 1.6424527  | -2.2169340 | -2.6055840 |
| H  | 2.5051836  | -1.5516655 | -2.6214286 |
| C  | 1.7104054  | 3.2389816  | 1.7458631  |
| H  | 1.9100419  | 4.1684247  | 1.2141252  |
| C  | 0.6979617  | 2.3910021  | 1.3036039  |
| H  | 0.1135398  | 2.6403701  | 0.4185767  |
| C  | -2.4348488 | 0.6476187  | 2.0009321  |
| C  | -3.5359656 | -0.2287088 | 1.9556784  |
| H  | -3.3938612 | -1.2620075 | 1.6365693  |
| C  | -4.8018285 | 0.2193354  | 2.3397918  |
| H  | -5.6504515 | -0.4629165 | 2.3068974  |
| C  | -4.9756513 | 1.5372721  | 2.7722016  |
| H  | -5.9630497 | 1.8845411  | 3.0739539  |
| C  | -3.8835616 | 2.4067684  | 2.8243737  |
| H  | -4.0174228 | 3.4311712  | 3.1700628  |
| C  | -2.6145000 | 1.9664343  | 2.4396384  |
| H  | -1.7623020 | 2.6438256  | 2.4863592  |
| C  | -0.5732142 | -1.5334927 | 2.0783384  |
| C  | 0.0202881  | -2.5690783 | 1.3461906  |
| H  | 0.2661703  | -2.4218416 | 0.2966084  |
| C  | 0.2691005  | -3.8025500 | 1.9498876  |
| H  | 0.7273321  | -4.6039180 | 1.3713655  |
| C  | -0.0790317 | -4.0093415 | 3.2865962  |
| H  | 0.1107137  | -4.9736860 | 3.7567606  |
| C  | -0.6820195 | -2.9826247 | 4.0197572  |
| H  | -0.9637559 | -3.1456298 | 5.0594816  |
| C  | -0.9305288 | -1.7480736 | 3.4202331  |
| H  | -1.4107400 | -0.9538060 | 3.9921392  |

|   |            |            |            |
|---|------------|------------|------------|
| C | 1.7609332  | -3.5301504 | -3.0648129 |
| H | 2.7197448  | -3.8882173 | -3.4382051 |
| C | 0.6538419  | -4.3825354 | -3.0447646 |
| H | 0.7503666  | -5.4071922 | -3.4023968 |
| C | -0.5765439 | -3.9247409 | -2.5624425 |
| H | -1.4385745 | -4.5907467 | -2.5432891 |
| C | -0.6976140 | -2.6167241 | -2.0959645 |
| H | -1.6423908 | -2.2561918 | -1.6871719 |
| C | -0.3149998 | 0.8803892  | -3.0279211 |
| C | -0.6840667 | 2.2327111  | -2.8887686 |
| H | -0.6158464 | 2.7115840  | -1.9112219 |
| C | -1.1239421 | 2.9599297  | -3.9950962 |
| H | -1.4024577 | 4.0068318  | -3.8800569 |
| C | -1.2064742 | 2.3431406  | -5.2472398 |
| H | -1.5569626 | 2.9083864  | -6.1100131 |
| C | -0.8402632 | 1.0037159  | -5.3912523 |
| H | -0.9063774 | 0.5214305  | -6.3658043 |
| C | -0.3908469 | 0.2730619  | -4.2881576 |
| H | -0.1080715 | -0.7717798 | -4.4060364 |
| C | 1.8583327  | 0.5311019  | -1.1002597 |
| C | 2.5282529  | -0.1008269 | -0.0387721 |
| H | 2.0899835  | -0.9722742 | 0.4476988  |
| C | 3.7526776  | 0.3899131  | 0.4058552  |
| H | 4.2605712  | -0.0982491 | 1.2363736  |
| C | 4.3236644  | 1.5088537  | -0.2084087 |
| H | 5.2800856  | 1.8935451  | 0.1437956  |
| C | 3.6726564  | 2.1272281  | -1.2766217 |
| H | 4.1225075  | 2.9901068  | -1.7665676 |
| C | 2.4416104  | 1.6424224  | -1.7232042 |
| H | 1.9384547  | 2.1291918  | -2.5571078 |

SCF energy GEOOPT = -2301.699378877 H

ZPE = 1423. kJ/mol

FREEH energy = 1519.44 kJ/mol

FREEH entropy = 0.97133 kJ/mol/K

\$vibrational spectrum

| # | mode | symmetry | wave number<br>cm**(-1) | IR intensity<br>km/mol | selection rules |       |
|---|------|----------|-------------------------|------------------------|-----------------|-------|
| # |      |          |                         |                        | IR              | RAMAN |
|   | 1    |          | -0.00                   | 0.00000                | -               | -     |
|   | 2    |          | 0.00                    | 0.00000                | -               | -     |
|   | 3    |          | 0.00                    | 0.00000                | -               | -     |
|   | 4    |          | 0.00                    | 0.00000                | -               | -     |
|   | 5    |          | 0.00                    | 0.00000                | -               | -     |
|   | 6    |          | 0.00                    | 0.00000                | -               | -     |
|   | 7    | a        | 18.56                   | 0.03920                | YES             | YES   |
|   | 8    | a        | 21.42                   | 0.01731                | YES             | YES   |
|   | 9    | a        | 26.29                   | 0.04203                | YES             | YES   |
|   | 10   | a        | 35.44                   | 0.08181                | YES             | YES   |
|   | 11   | a        | 38.32                   | 0.01874                | YES             | YES   |
|   | 12   | a        | 40.88                   | 0.00827                | YES             | YES   |
|   | 13   | a        | 42.39                   | 0.01280                | YES             | YES   |
|   | 14   | a        | 50.83                   | 0.08666                | YES             | YES   |
|   | 15   | a        | 51.46                   | 0.07311                | YES             | YES   |
|   | 16   | a        | 53.54                   | 0.00792                | YES             | YES   |
|   | 17   | a        | 60.95                   | 0.17747                | YES             | YES   |
|   | 18   | a        | 64.96                   | 0.17566                | YES             | YES   |
|   | 19   | a        | 68.35                   | 0.02697                | YES             | YES   |

|    |   |        |           |     |     |
|----|---|--------|-----------|-----|-----|
| 20 | a | 71.09  | 0.10578   | YES | YES |
| 21 | a | 76.48  | 0.30548   | YES | YES |
| 22 | a | 82.43  | 0.94629   | YES | YES |
| 23 | a | 86.24  | 1.03016   | YES | YES |
| 24 | a | 94.44  | 6.10893   | YES | YES |
| 25 | a | 97.51  | 1.76678   | YES | YES |
| 26 | a | 112.85 | 3.48949   | YES | YES |
| 27 | a | 171.90 | 8.29964   | YES | YES |
| 28 | a | 188.32 | 2.36321   | YES | YES |
| 29 | a | 195.43 | 1.09775   | YES | YES |
| 30 | a | 205.05 | 1.39726   | YES | YES |
| 31 | a | 217.10 | 1.84127   | YES | YES |
| 32 | a | 222.01 | 1.34210   | YES | YES |
| 33 | a | 226.79 | 0.47474   | YES | YES |
| 34 | a | 241.80 | 0.25927   | YES | YES |
| 35 | a | 243.81 | 1.81608   | YES | YES |
| 36 | a | 253.93 | 1.16007   | YES | YES |
| 37 | a | 258.17 | 0.03856   | YES | YES |
| 38 | a | 266.25 | 0.38819   | YES | YES |
| 39 | a | 266.86 | 1.09981   | YES | YES |
| 40 | a | 332.41 | 5.41572   | YES | YES |
| 41 | a | 376.06 | 19.66795  | YES | YES |
| 42 | a | 387.96 | 0.18884   | YES | YES |
| 43 | a | 389.60 | 1.26284   | YES | YES |
| 44 | a | 390.91 | 0.82861   | YES | YES |
| 45 | a | 393.21 | 0.36211   | YES | YES |
| 46 | a | 398.44 | 0.01682   | YES | YES |
| 47 | a | 398.81 | 0.48436   | YES | YES |
| 48 | a | 401.50 | 5.37588   | YES | YES |
| 49 | a | 439.26 | 4.92334   | YES | YES |
| 50 | a | 445.09 | 2.69206   | YES | YES |
| 51 | a | 453.70 | 8.38395   | YES | YES |
| 52 | a | 459.11 | 8.29343   | YES | YES |
| 53 | a | 484.50 | 7.76484   | YES | YES |
| 54 | a | 503.15 | 108.04960 | YES | YES |
| 55 | a | 507.30 | 11.56648  | YES | YES |
| 56 | a | 515.11 | 41.40415  | YES | YES |
| 57 | a | 524.05 | 82.51825  | YES | YES |
| 58 | a | 544.97 | 49.97863  | YES | YES |
| 59 | a | 612.88 | 1.67470   | YES | YES |
| 60 | a | 613.51 | 0.04970   | YES | YES |
| 61 | a | 613.71 | 1.24760   | YES | YES |
| 62 | a | 613.81 | 0.26370   | YES | YES |
| 63 | a | 614.77 | 1.45499   | YES | YES |
| 64 | a | 615.46 | 0.32898   | YES | YES |
| 65 | a | 657.17 | 81.43585  | YES | YES |
| 66 | a | 681.00 | 1.48294   | YES | YES |
| 67 | a | 690.25 | 40.75215  | YES | YES |
| 68 | a | 691.60 | 21.10301  | YES | YES |
| 69 | a | 694.06 | 34.94507  | YES | YES |
| 70 | a | 696.77 | 21.05394  | YES | YES |
| 71 | a | 697.81 | 20.28286  | YES | YES |
| 72 | a | 699.17 | 10.56983  | YES | YES |
| 73 | a | 709.06 | 5.11658   | YES | YES |
| 74 | a | 710.56 | 24.11030  | YES | YES |
| 75 | a | 711.93 | 10.28593  | YES | YES |
| 76 | a | 713.67 | 39.93934  | YES | YES |
| 77 | a | 730.77 | 200.61543 | YES | YES |

|     |   |         |           |     |     |
|-----|---|---------|-----------|-----|-----|
| 78  | a | 736.79  | 28.78207  | YES | YES |
| 79  | a | 741.31  | 2.25601   | YES | YES |
| 80  | a | 742.87  | 9.66339   | YES | YES |
| 81  | a | 746.06  | 12.64768  | YES | YES |
| 82  | a | 746.33  | 5.81286   | YES | YES |
| 83  | a | 757.70  | 107.70786 | YES | YES |
| 84  | a | 834.65  | 0.03150   | YES | YES |
| 85  | a | 837.73  | 2.46769   | YES | YES |
| 86  | a | 840.83  | 0.16266   | YES | YES |
| 87  | a | 843.43  | 0.48965   | YES | YES |
| 88  | a | 844.86  | 0.45465   | YES | YES |
| 89  | a | 846.43  | 0.09912   | YES | YES |
| 90  | a | 912.93  | 0.37485   | YES | YES |
| 91  | a | 916.76  | 0.56074   | YES | YES |
| 92  | a | 919.13  | 0.12847   | YES | YES |
| 93  | a | 920.29  | 0.34506   | YES | YES |
| 94  | a | 922.17  | 0.26990   | YES | YES |
| 95  | a | 923.80  | 0.16797   | YES | YES |
| 96  | a | 962.97  | 0.19520   | YES | YES |
| 97  | a | 964.55  | 0.18729   | YES | YES |
| 98  | a | 967.60  | 0.40212   | YES | YES |
| 99  | a | 968.09  | 0.12315   | YES | YES |
| 100 | a | 968.78  | 0.95395   | YES | YES |
| 101 | a | 970.14  | 0.21524   | YES | YES |
| 102 | a | 985.79  | 0.18806   | YES | YES |
| 103 | a | 987.44  | 0.01531   | YES | YES |
| 104 | a | 991.68  | 0.03924   | YES | YES |
| 105 | a | 992.22  | 0.09266   | YES | YES |
| 106 | a | 992.84  | 0.78380   | YES | YES |
| 107 | a | 993.93  | 1.10529   | YES | YES |
| 108 | a | 996.09  | 8.52622   | YES | YES |
| 109 | a | 996.72  | 6.72340   | YES | YES |
| 110 | a | 997.47  | 3.13653   | YES | YES |
| 111 | a | 997.61  | 4.96224   | YES | YES |
| 112 | a | 998.28  | 2.61780   | YES | YES |
| 113 | a | 999.53  | 1.67646   | YES | YES |
| 114 | a | 1024.18 | 4.23577   | YES | YES |
| 115 | a | 1024.80 | 0.99903   | YES | YES |
| 116 | a | 1025.48 | 1.56802   | YES | YES |
| 117 | a | 1025.75 | 1.89914   | YES | YES |
| 118 | a | 1026.27 | 1.02645   | YES | YES |
| 119 | a | 1027.36 | 0.40736   | YES | YES |
| 120 | a | 1075.02 | 1.66449   | YES | YES |
| 121 | a | 1075.52 | 2.27165   | YES | YES |
| 122 | a | 1075.85 | 8.12232   | YES | YES |
| 123 | a | 1076.78 | 0.86083   | YES | YES |
| 124 | a | 1079.65 | 3.11502   | YES | YES |
| 125 | a | 1082.82 | 3.46794   | YES | YES |
| 126 | a | 1087.20 | 17.17883  | YES | YES |
| 127 | a | 1091.16 | 17.96915  | YES | YES |
| 128 | a | 1093.87 | 65.01122  | YES | YES |
| 129 | a | 1095.70 | 33.44435  | YES | YES |
| 130 | a | 1097.16 | 63.62378  | YES | YES |
| 131 | a | 1098.76 | 38.51157  | YES | YES |
| 132 | a | 1124.10 | 599.92258 | YES | YES |
| 133 | a | 1156.80 | 0.29942   | YES | YES |
| 134 | a | 1157.47 | 0.40412   | YES | YES |
| 135 | a | 1157.69 | 0.31195   | YES | YES |

|     |   |         |          |     |     |
|-----|---|---------|----------|-----|-----|
| 136 | a | 1158.54 | 0.55159  | YES | YES |
| 137 | a | 1158.73 | 0.25756  | YES | YES |
| 138 | a | 1159.28 | 0.22687  | YES | YES |
| 139 | a | 1172.58 | 1.41707  | YES | YES |
| 140 | a | 1174.23 | 3.04210  | YES | YES |
| 141 | a | 1175.46 | 1.24066  | YES | YES |
| 142 | a | 1176.05 | 2.95308  | YES | YES |
| 143 | a | 1177.83 | 1.81688  | YES | YES |
| 144 | a | 1181.38 | 2.55654  | YES | YES |
| 145 | a | 1294.27 | 5.93524  | YES | YES |
| 146 | a | 1295.22 | 2.10422  | YES | YES |
| 147 | a | 1295.97 | 6.89899  | YES | YES |
| 148 | a | 1296.48 | 1.98690  | YES | YES |
| 149 | a | 1302.65 | 6.85333  | YES | YES |
| 150 | a | 1303.48 | 0.63750  | YES | YES |
| 151 | a | 1336.01 | 0.43501  | YES | YES |
| 152 | a | 1336.85 | 0.49336  | YES | YES |
| 153 | a | 1337.25 | 0.28545  | YES | YES |
| 154 | a | 1338.39 | 0.44080  | YES | YES |
| 155 | a | 1339.15 | 0.34181  | YES | YES |
| 156 | a | 1339.95 | 0.00192  | YES | YES |
| 157 | a | 1426.39 | 19.52694 | YES | YES |
| 158 | a | 1427.11 | 12.44448 | YES | YES |
| 159 | a | 1429.17 | 3.27528  | YES | YES |
| 160 | a | 1429.27 | 20.07023 | YES | YES |
| 161 | a | 1431.73 | 18.21378 | YES | YES |
| 162 | a | 1431.83 | 26.41606 | YES | YES |
| 163 | a | 1469.07 | 6.25628  | YES | YES |
| 164 | a | 1469.33 | 1.66542  | YES | YES |
| 165 | a | 1470.41 | 9.34112  | YES | YES |
| 166 | a | 1471.75 | 7.49911  | YES | YES |
| 167 | a | 1473.92 | 2.68684  | YES | YES |
| 168 | a | 1474.94 | 6.75734  | YES | YES |
| 169 | a | 1566.96 | 0.17218  | YES | YES |
| 170 | a | 1567.63 | 0.18361  | YES | YES |
| 171 | a | 1569.44 | 0.43183  | YES | YES |
| 172 | a | 1570.33 | 0.21969  | YES | YES |
| 173 | a | 1571.59 | 1.77325  | YES | YES |
| 174 | a | 1571.71 | 0.20201  | YES | YES |
| 175 | a | 1580.25 | 0.25693  | YES | YES |
| 176 | a | 1581.17 | 1.14040  | YES | YES |
| 177 | a | 1582.71 | 0.83759  | YES | YES |
| 178 | a | 1583.42 | 0.24139  | YES | YES |
| 179 | a | 1584.47 | 2.45360  | YES | YES |
| 180 | a | 1585.40 | 0.74449  | YES | YES |
| 181 | a | 3092.87 | 2.79874  | YES | YES |
| 182 | a | 3093.62 | 0.94615  | YES | YES |
| 183 | a | 3096.89 | 1.23700  | YES | YES |
| 184 | a | 3099.49 | 0.03973  | YES | YES |
| 185 | a | 3101.70 | 1.03912  | YES | YES |
| 186 | a | 3102.29 | 1.00630  | YES | YES |
| 187 | a | 3107.94 | 0.18896  | YES | YES |
| 188 | a | 3108.29 | 0.16690  | YES | YES |
| 189 | a | 3109.04 | 0.14643  | YES | YES |
| 190 | a | 3109.53 | 0.02797  | YES | YES |
| 191 | a | 3111.17 | 0.67918  | YES | YES |
| 192 | a | 3111.85 | 0.18531  | YES | YES |
| 193 | a | 3114.96 | 0.28810  | YES | YES |



|     |   |         |          |     |     |
|-----|---|---------|----------|-----|-----|
| 194 | a | 3116.49 | 0.13017  | YES | YES |
| 195 | a | 3118.17 | 1.62229  | YES | YES |
| 196 | a | 3118.31 | 1.19887  | YES | YES |
| 197 | a | 3119.57 | 1.44502  | YES | YES |
| 198 | a | 3120.16 | 7.97406  | YES | YES |
| 199 | a | 3123.11 | 6.85511  | YES | YES |
| 200 | a | 3124.34 | 4.13896  | YES | YES |
| 201 | a | 3125.49 | 0.85592  | YES | YES |
| 202 | a | 3125.82 | 8.51951  | YES | YES |
| 203 | a | 3127.03 | 2.81587  | YES | YES |
| 204 | a | 3128.62 | 2.99826  | YES | YES |
| 205 | a | 3131.77 | 8.90349  | YES | YES |
| 206 | a | 3132.23 | 7.12971  | YES | YES |
| 207 | a | 3133.10 | 11.33862 | YES | YES |
| 208 | a | 3133.68 | 7.18401  | YES | YES |
| 209 | a | 3133.87 | 10.50317 | YES | YES |
| 210 | a | 3134.36 | 6.78404  | YES | YES |

§end

COSMO energy + OC correction = -2301.7484332423 H

## 8.12 [Ag(CDP<sup>Ph</sup>)]<sup>+</sup>

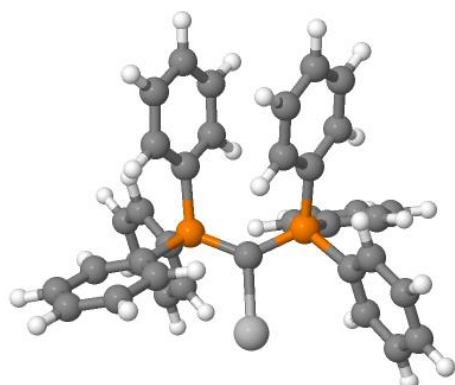

Method: (RI-)BP86(D3BJ)/def2-TZVPP  
Symmetry: c1

Cartesian coordinates in Ångström:

|    |            |            |            |
|----|------------|------------|------------|
| P  | 0.1361628  | -0.0740791 | -1.5815124 |
| Ag | -3.0000549 | -0.0521603 | -0.9835200 |
| P  | -0.8682382 | 0.1105446  | 1.3307082  |
| C  | -1.0268468 | 0.1492400  | -0.3615111 |
| C  | 0.3897352  | -1.7849386 | -2.1629631 |
| C  | 0.4682806  | 1.1753051  | 1.9440616  |
| C  | 1.2541067  | 0.8154395  | 3.0471397  |
| H  | 1.0863976  | -0.1331504 | 3.5540618  |
| C  | 2.2709367  | 1.6655542  | 3.4828710  |
| H  | 2.8827088  | 1.3805294  | 4.3381025  |
| C  | 2.5101357  | 2.8708630  | 2.8199157  |
| H  | 3.3105318  | 3.5284884  | 3.1574360  |
| C  | 1.6511239  | -2.2241833 | -2.5926854 |
| H  | 2.5031523  | -1.5460648 | -2.5655556 |
| C  | 1.7283046  | 3.2315353  | 1.7188400  |
| H  | 1.9193673  | 4.1668651  | 1.1944648  |
| C  | 0.7087179  | 2.3892715  | 1.2811800  |

|   |            |            |            |
|---|------------|------------|------------|
| H | 0.1089047  | 2.6503642  | 0.4102587  |
| C | -2.4212771 | 0.7251818  | 2.0511288  |
| C | -3.5433357 | -0.1248235 | 2.0621680  |
| H | -3.4375665 | -1.1709132 | 1.7696758  |
| C | -4.7803802 | 0.3597262  | 2.4871639  |
| H | -5.6453347 | -0.3026649 | 2.5038414  |
| C | -4.9027967 | 1.6878528  | 2.9105123  |
| H | -5.8687103 | 2.0646567  | 3.2449318  |
| C | -3.7853372 | 2.5241006  | 2.9220318  |
| H | -3.8769868 | 3.5536990  | 3.2660299  |
| C | -2.5433236 | 2.0456111  | 2.4944417  |
| H | -1.6726808 | 2.7001260  | 2.5052928  |
| C | -0.6280582 | -1.5144312 | 2.1098441  |
| C | -0.1054053 | -2.5683422 | 1.3504191  |
| H | 0.0995643  | -2.4223668 | 0.2911331  |
| C | 0.1216205  | -3.8124812 | 1.9406479  |
| H | 0.5251390  | -4.6287795 | 1.3425501  |
| C | -0.1796305 | -4.0102552 | 3.2901766  |
| H | -0.0077241 | -4.9827978 | 3.7502565  |
| C | -0.7141549 | -2.9647069 | 4.0499040  |
| H | -0.9604216 | -3.1220784 | 5.0994557  |
| C | -0.9401630 | -1.7192892 | 3.4642327  |
| H | -1.3682247 | -0.9094978 | 4.0555326  |
| C | 1.8169439  | -3.5340654 | -3.0479325 |
| H | 2.7998201  | -3.8714327 | -3.3752487 |
| C | 0.7281888  | -4.4078627 | -3.0818918 |
| H | 0.8605866  | -5.4298181 | -3.4356164 |
| C | -0.5320162 | -3.9721971 | -2.6596675 |
| H | -1.3826793 | -4.6525159 | -2.6843681 |
| C | -0.6998452 | -2.6673879 | -2.2006752 |
| H | -1.6765632 | -2.3300605 | -1.8477205 |
| C | -0.3682106 | 0.8540730  | -3.0569037 |
| C | -1.0751522 | 2.0558480  | -2.8944359 |
| H | -1.3410639 | 2.3838795  | -1.8891336 |
| C | -1.4347020 | 2.8093370  | -4.0114397 |
| H | -1.9826290 | 3.7423485  | -3.8830528 |
| C | -1.0921809 | 2.3667538  | -5.2928075 |
| H | -1.3779035 | 2.9532447  | -6.1654327 |
| C | -0.3872081 | 1.1717765  | -5.4564143 |
| H | -0.1254708 | 0.8238272  | -6.4549886 |
| C | -0.0217830 | 0.4148242  | -4.3418717 |
| H | 0.5202767  | -0.5208671 | -4.4726962 |
| C | 1.7826989  | 0.5205084  | -1.1175213 |
| C | 2.4896803  | -0.1385625 | -0.0983382 |
| H | 2.0832670  | -1.0408334 | 0.3588053  |
| C | 3.7123294  | 0.3654145  | 0.3377954  |
| H | 4.2517811  | -0.1418603 | 1.1363136  |
| C | 4.2419066  | 1.5204207  | -0.2454624 |
| H | 5.1986821  | 1.9121881  | 0.0979222  |
| C | 3.5497422  | 2.1680323  | -1.2701118 |
| H | 3.9665356  | 3.0619246  | -1.7327686 |
| C | 2.3194600  | 1.6734354  | -1.7058325 |
| H | 1.7772503  | 2.1826572  | -2.5011375 |

SCF energy GEOOPT = -2258.508947144 H  
 ZPE = 1424. kJ/mol  
 FREEH energy = 1519.77 kJ/mol  
 FREEH entropy = 0.97176 kJ/mol/K

\$vibrational spectrum

| #  | mode | symmetry | wave number | IR intensity | selection rules |       |
|----|------|----------|-------------|--------------|-----------------|-------|
| #  |      |          | cm**(-1)    | km/mol       | IR              | RAMAN |
| 1  |      |          | -0.00       | 0.00000      | -               | -     |
| 2  |      |          | -0.00       | 0.00000      | -               | -     |
| 3  |      |          | -0.00       | 0.00000      | -               | -     |
| 4  |      |          | -0.00       | 0.00000      | -               | -     |
| 5  |      |          | -0.00       | 0.00000      | -               | -     |
| 6  |      |          | 0.00        | 0.00000      | -               | -     |
| 7  |      | a        | 17.65       | 0.02354      | YES             | YES   |
| 8  |      | a        | 20.68       | 0.02458      | YES             | YES   |
| 9  |      | a        | 26.47       | 0.08223      | YES             | YES   |
| 10 |      | a        | 33.42       | 0.05944      | YES             | YES   |
| 11 |      | a        | 38.10       | 0.06857      | YES             | YES   |
| 12 |      | a        | 42.17       | 0.09146      | YES             | YES   |
| 13 |      | a        | 45.86       | 0.14945      | YES             | YES   |
| 14 |      | a        | 47.09       | 0.08183      | YES             | YES   |
| 15 |      | a        | 52.71       | 0.05858      | YES             | YES   |
| 16 |      | a        | 53.73       | 0.16601      | YES             | YES   |
| 17 |      | a        | 54.48       | 0.10762      | YES             | YES   |
| 18 |      | a        | 55.84       | 0.98992      | YES             | YES   |
| 19 |      | a        | 61.58       | 0.33267      | YES             | YES   |
| 20 |      | a        | 70.99       | 0.51208      | YES             | YES   |
| 21 |      | a        | 75.93       | 0.24478      | YES             | YES   |
| 22 |      | a        | 81.00       | 0.07982      | YES             | YES   |
| 23 |      | a        | 90.43       | 0.32766      | YES             | YES   |
| 24 |      | a        | 97.67       | 0.05703      | YES             | YES   |
| 25 |      | a        | 103.60      | 1.35438      | YES             | YES   |
| 26 |      | a        | 121.27      | 0.15743      | YES             | YES   |
| 27 |      | a        | 184.16      | 1.74748      | YES             | YES   |
| 28 |      | a        | 188.26      | 1.91087      | YES             | YES   |
| 29 |      | a        | 193.89      | 2.32881      | YES             | YES   |
| 30 |      | a        | 211.13      | 0.88370      | YES             | YES   |
| 31 |      | a        | 219.03      | 2.35575      | YES             | YES   |
| 32 |      | a        | 220.21      | 0.77622      | YES             | YES   |
| 33 |      | a        | 225.98      | 1.00720      | YES             | YES   |
| 34 |      | a        | 245.03      | 0.19842      | YES             | YES   |
| 35 |      | a        | 245.78      | 1.19393      | YES             | YES   |
| 36 |      | a        | 254.11      | 0.69028      | YES             | YES   |
| 37 |      | a        | 258.65      | 0.20636      | YES             | YES   |
| 38 |      | a        | 266.40      | 1.04007      | YES             | YES   |
| 39 |      | a        | 269.48      | 0.79953      | YES             | YES   |
| 40 |      | a        | 316.78      | 8.02053      | YES             | YES   |
| 41 |      | a        | 383.54      | 26.99789     | YES             | YES   |
| 42 |      | a        | 386.98      | 0.34396      | YES             | YES   |
| 43 |      | a        | 389.38      | 0.29863      | YES             | YES   |
| 44 |      | a        | 391.07      | 0.91266      | YES             | YES   |
| 45 |      | a        | 393.74      | 0.15383      | YES             | YES   |
| 46 |      | a        | 396.88      | 0.06693      | YES             | YES   |
| 47 |      | a        | 399.56      | 0.01517      | YES             | YES   |
| 48 |      | a        | 427.46      | 4.52523      | YES             | YES   |
| 49 |      | a        | 439.62      | 3.22258      | YES             | YES   |
| 50 |      | a        | 443.11      | 1.46327      | YES             | YES   |
| 51 |      | a        | 448.70      | 6.51812      | YES             | YES   |
| 52 |      | a        | 456.76      | 10.88006     | YES             | YES   |
| 53 |      | a        | 495.92      | 84.26406     | YES             | YES   |
| 54 |      | a        | 500.84      | 52.00500     | YES             | YES   |

|     |   |        |           |     |     |
|-----|---|--------|-----------|-----|-----|
| 55  | a | 509.10 | 28.10911  | YES | YES |
| 56  | a | 509.86 | 93.30744  | YES | YES |
| 57  | a | 518.54 | 27.41257  | YES | YES |
| 58  | a | 558.16 | 3.59644   | YES | YES |
| 59  | a | 612.58 | 0.24044   | YES | YES |
| 60  | a | 613.53 | 0.00281   | YES | YES |
| 61  | a | 613.84 | 0.01991   | YES | YES |
| 62  | a | 614.45 | 0.04629   | YES | YES |
| 63  | a | 614.73 | 0.13111   | YES | YES |
| 64  | a | 615.08 | 0.64807   | YES | YES |
| 65  | a | 677.73 | 2.93248   | YES | YES |
| 66  | a | 682.27 | 2.94732   | YES | YES |
| 67  | a | 690.26 | 60.09042  | YES | YES |
| 68  | a | 691.68 | 15.90804  | YES | YES |
| 69  | a | 692.10 | 17.74632  | YES | YES |
| 70  | a | 694.59 | 24.18531  | YES | YES |
| 71  | a | 695.33 | 20.47434  | YES | YES |
| 72  | a | 698.82 | 15.35975  | YES | YES |
| 73  | a | 710.29 | 26.75798  | YES | YES |
| 74  | a | 710.64 | 11.63665  | YES | YES |
| 75  | a | 713.49 | 30.23098  | YES | YES |
| 76  | a | 714.22 | 14.61487  | YES | YES |
| 77  | a | 735.40 | 37.22297  | YES | YES |
| 78  | a | 737.54 | 32.95729  | YES | YES |
| 79  | a | 741.50 | 17.54505  | YES | YES |
| 80  | a | 742.24 | 7.28561   | YES | YES |
| 81  | a | 746.07 | 13.24809  | YES | YES |
| 82  | a | 746.92 | 9.14125   | YES | YES |
| 83  | a | 791.27 | 106.25169 | YES | YES |
| 84  | a | 834.93 | 0.84123   | YES | YES |
| 85  | a | 836.08 | 0.75848   | YES | YES |
| 86  | a | 838.01 | 0.03398   | YES | YES |
| 87  | a | 840.46 | 1.51218   | YES | YES |
| 88  | a | 843.51 | 0.20570   | YES | YES |
| 89  | a | 846.39 | 0.13878   | YES | YES |
| 90  | a | 913.71 | 0.79368   | YES | YES |
| 91  | a | 915.07 | 1.10869   | YES | YES |
| 92  | a | 916.93 | 0.39298   | YES | YES |
| 93  | a | 920.72 | 0.21071   | YES | YES |
| 94  | a | 924.21 | 0.22130   | YES | YES |
| 95  | a | 925.13 | 0.23322   | YES | YES |
| 96  | a | 962.46 | 0.62392   | YES | YES |
| 97  | a | 963.87 | 0.15215   | YES | YES |
| 98  | a | 965.26 | 0.01080   | YES | YES |
| 99  | a | 967.81 | 0.01575   | YES | YES |
| 100 | a | 969.47 | 0.44680   | YES | YES |
| 101 | a | 971.08 | 0.26732   | YES | YES |
| 102 | a | 986.44 | 0.21249   | YES | YES |
| 103 | a | 988.46 | 0.05913   | YES | YES |
| 104 | a | 989.38 | 0.18436   | YES | YES |
| 105 | a | 990.66 | 0.08051   | YES | YES |
| 106 | a | 991.86 | 0.13202   | YES | YES |
| 107 | a | 992.32 | 0.05695   | YES | YES |
| 108 | a | 995.89 | 10.06337  | YES | YES |
| 109 | a | 996.29 | 5.80857   | YES | YES |
| 110 | a | 997.43 | 5.09991   | YES | YES |
| 111 | a | 997.61 | 4.93326   | YES | YES |
| 112 | a | 998.05 | 0.80604   | YES | YES |

|     |   |         |           |     |     |
|-----|---|---------|-----------|-----|-----|
| 113 | a | 999.11  | 3.19906   | YES | YES |
| 114 | a | 1024.22 | 2.35087   | YES | YES |
| 115 | a | 1024.85 | 2.69278   | YES | YES |
| 116 | a | 1025.19 | 2.24126   | YES | YES |
| 117 | a | 1025.52 | 1.22858   | YES | YES |
| 118 | a | 1026.48 | 0.92297   | YES | YES |
| 119 | a | 1027.41 | 0.91989   | YES | YES |
| 120 | a | 1075.43 | 2.84639   | YES | YES |
| 121 | a | 1076.28 | 5.11986   | YES | YES |
| 122 | a | 1077.30 | 6.83544   | YES | YES |
| 123 | a | 1077.80 | 0.81339   | YES | YES |
| 124 | a | 1080.81 | 0.56216   | YES | YES |
| 125 | a | 1082.28 | 2.24684   | YES | YES |
| 126 | a | 1088.72 | 14.82805  | YES | YES |
| 127 | a | 1091.76 | 21.07372  | YES | YES |
| 128 | a | 1094.52 | 78.94081  | YES | YES |
| 129 | a | 1095.96 | 10.13005  | YES | YES |
| 130 | a | 1097.72 | 53.54378  | YES | YES |
| 131 | a | 1100.15 | 53.18514  | YES | YES |
| 132 | a | 1135.65 | 668.36026 | YES | YES |
| 133 | a | 1157.34 | 0.18626   | YES | YES |
| 134 | a | 1157.42 | 0.71522   | YES | YES |
| 135 | a | 1157.64 | 0.33138   | YES | YES |
| 136 | a | 1157.84 | 0.39526   | YES | YES |
| 137 | a | 1158.39 | 0.33979   | YES | YES |
| 138 | a | 1158.74 | 0.52355   | YES | YES |
| 139 | a | 1173.64 | 1.41064   | YES | YES |
| 140 | a | 1175.08 | 2.50637   | YES | YES |
| 141 | a | 1175.57 | 4.40819   | YES | YES |
| 142 | a | 1175.99 | 2.67549   | YES | YES |
| 143 | a | 1177.57 | 4.80532   | YES | YES |
| 144 | a | 1180.85 | 3.64045   | YES | YES |
| 145 | a | 1295.38 | 5.48801   | YES | YES |
| 146 | a | 1295.96 | 6.02737   | YES | YES |
| 147 | a | 1296.99 | 2.24660   | YES | YES |
| 148 | a | 1297.78 | 3.77882   | YES | YES |
| 149 | a | 1302.51 | 5.84644   | YES | YES |
| 150 | a | 1303.73 | 0.92155   | YES | YES |
| 151 | a | 1336.73 | 0.30156   | YES | YES |
| 152 | a | 1337.08 | 0.11180   | YES | YES |
| 153 | a | 1338.46 | 0.35040   | YES | YES |
| 154 | a | 1338.91 | 0.19795   | YES | YES |
| 155 | a | 1339.38 | 0.07119   | YES | YES |
| 156 | a | 1339.88 | 0.05583   | YES | YES |
| 157 | a | 1426.81 | 19.03470  | YES | YES |
| 158 | a | 1428.41 | 18.16464  | YES | YES |
| 159 | a | 1429.50 | 6.46655   | YES | YES |
| 160 | a | 1430.35 | 12.73022  | YES | YES |
| 161 | a | 1431.85 | 9.82089   | YES | YES |
| 162 | a | 1432.30 | 36.63173  | YES | YES |
| 163 | a | 1469.77 | 6.07138   | YES | YES |
| 164 | a | 1470.06 | 2.79065   | YES | YES |
| 165 | a | 1470.70 | 8.17214   | YES | YES |
| 166 | a | 1471.83 | 6.06017   | YES | YES |
| 167 | a | 1473.20 | 2.91031   | YES | YES |
| 168 | a | 1474.61 | 6.55326   | YES | YES |
| 169 | a | 1568.52 | 0.45893   | YES | YES |
| 170 | a | 1568.86 | 0.15583   | YES | YES |

|     |   |         |          |     |     |
|-----|---|---------|----------|-----|-----|
| 171 | a | 1570.42 | 0.09801  | YES | YES |
| 172 | a | 1570.71 | 0.13224  | YES | YES |
| 173 | a | 1571.71 | 0.62873  | YES | YES |
| 174 | a | 1572.03 | 1.83946  | YES | YES |
| 175 | a | 1580.27 | 0.29124  | YES | YES |
| 176 | a | 1582.69 | 1.36261  | YES | YES |
| 177 | a | 1583.15 | 0.51541  | YES | YES |
| 178 | a | 1583.37 | 0.04153  | YES | YES |
| 179 | a | 1584.04 | 2.87710  | YES | YES |
| 180 | a | 1585.48 | 1.17345  | YES | YES |
| 181 | a | 3067.92 | 2.40580  | YES | YES |
| 182 | a | 3087.42 | 3.70403  | YES | YES |
| 183 | a | 3097.64 | 0.54262  | YES | YES |
| 184 | a | 3099.79 | 0.17084  | YES | YES |
| 185 | a | 3101.80 | 1.38004  | YES | YES |
| 186 | a | 3105.97 | 0.27140  | YES | YES |
| 187 | a | 3108.08 | 0.16357  | YES | YES |
| 188 | a | 3109.31 | 0.20028  | YES | YES |
| 189 | a | 3109.50 | 0.13063  | YES | YES |
| 190 | a | 3109.56 | 0.08197  | YES | YES |
| 191 | a | 3110.29 | 1.38264  | YES | YES |
| 192 | a | 3111.57 | 0.18174  | YES | YES |
| 193 | a | 3115.19 | 0.69144  | YES | YES |
| 194 | a | 3116.04 | 0.63840  | YES | YES |
| 195 | a | 3116.16 | 0.98807  | YES | YES |
| 196 | a | 3118.35 | 4.54214  | YES | YES |
| 197 | a | 3118.46 | 4.40549  | YES | YES |
| 198 | a | 3119.53 | 1.06425  | YES | YES |
| 199 | a | 3123.02 | 6.14639  | YES | YES |
| 200 | a | 3123.76 | 3.98220  | YES | YES |
| 201 | a | 3123.89 | 5.68620  | YES | YES |
| 202 | a | 3125.04 | 0.62201  | YES | YES |
| 203 | a | 3126.09 | 2.35747  | YES | YES |
| 204 | a | 3126.84 | 6.09753  | YES | YES |
| 205 | a | 3131.78 | 7.97118  | YES | YES |
| 206 | a | 3132.31 | 15.09857 | YES | YES |
| 207 | a | 3132.53 | 9.20161  | YES | YES |
| 208 | a | 3132.73 | 6.47513  | YES | YES |
| 209 | a | 3132.93 | 7.22047  | YES | YES |
| 210 | a | 3133.37 | 10.96002 | YES | YES |

Send

### 8.13 $[(\text{CDP}^{\text{Ph}})\text{Ag}(\text{CDP}^{\text{Ph}})]^+$

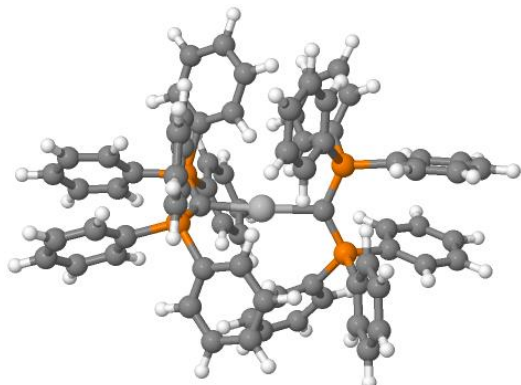

Method: (RI-)BP86(D3BJ)/def2-TZVPP

Symmetry: c1

Cartesian coordinates in Ångström:

|    |            |            |            |
|----|------------|------------|------------|
| Ag | -0.0541327 | -0.0033249 | 0.2231782  |
| C  | 1.2036501  | -1.6518445 | -0.0405786 |
| P  | 1.6487411  | -2.5471494 | 1.3019346  |
| C  | 1.9435047  | -4.3075124 | 0.9691482  |
| C  | 0.9154280  | -5.0325852 | 0.3422413  |
| H  | -0.0104043 | -4.5244456 | 0.0690765  |
| C  | 1.0884261  | -6.3855618 | 0.0587388  |
| H  | 0.2844887  | -6.9476339 | -0.4160269 |
| C  | 2.2979762  | -7.0155746 | 0.3701615  |
| H  | 2.4366789  | -8.0715545 | 0.1396189  |
| C  | 3.3302826  | -6.2906679 | 0.9679064  |
| H  | 4.2783066  | -6.7765948 | 1.1960695  |
| C  | 3.1522485  | -4.9405602 | 1.2786620  |
| H  | 3.9558858  | -4.3776967 | 1.7512589  |
| C  | 0.3654133  | -2.4748175 | 2.5975625  |
| C  | -0.2860696 | -3.6203569 | 3.0705194  |
| H  | -0.0155673 | -4.6017338 | 2.6850356  |
| C  | -1.2834843 | -3.5097802 | 4.0440961  |
| H  | -1.7843793 | -4.4073685 | 4.4060424  |
| C  | -1.6326172 | -2.2573797 | 4.5524655  |
| H  | -2.4118203 | -2.1730095 | 5.3096925  |
| C  | -0.9693043 | -1.1129017 | 4.0983289  |
| H  | -1.2194181 | -0.1322482 | 4.5002657  |
| C  | 0.0301973  | -1.2190681 | 3.1335499  |
| H  | 0.5580823  | -0.3239048 | 2.8062753  |
| C  | 3.1416052  | -1.9526059 | 2.1743281  |
| C  | 3.3093115  | -2.1234328 | 3.5557437  |
| H  | 2.5349304  | -2.6186994 | 4.1410236  |
| C  | 4.4606124  | -1.6453120 | 4.1836438  |
| H  | 4.5841946  | -1.7734341 | 5.2587926  |
| C  | 5.4532006  | -1.0039880 | 3.4364045  |
| H  | 6.3506572  | -0.6313075 | 3.9295180  |
| C  | 5.2910468  | -0.8362903 | 2.0578320  |
| H  | 6.0615383  | -0.3344615 | 1.4727167  |
| C  | 4.1340761  | -1.3022617 | 1.4329224  |
| H  | 3.9822952  | -1.1541633 | 0.3653929  |
| P  | 1.6761860  | -1.8130428 | -1.6441636 |
| C  | 2.2909493  | -0.2061771 | -2.2865643 |
| C  | 2.6635091  | 0.7745152  | -1.3561268 |

|   |            |            |            |
|---|------------|------------|------------|
| H | 2.5640945  | 0.5421744  | -0.2962504 |
| C | 3.1265608  | 2.0189105  | -1.7806428 |
| H | 3.3892305  | 2.7826436  | -1.0486708 |
| C | 3.2336618  | 2.2916173  | -3.1458195 |
| H | 3.5859901  | 3.2663607  | -3.4806261 |
| C | 2.8859831  | 1.3134021  | -4.0804078 |
| H | 2.9735976  | 1.5206239  | -5.1466895 |
| C | 2.4173872  | 0.0688633  | -3.6545483 |
| H | 2.1414152  | -0.6794064 | -4.3947836 |
| C | 0.3041595  | -2.2850663 | -2.7519440 |
| C | -1.0061905 | -2.2532371 | -2.2584183 |
| H | -1.1735844 | -1.9980363 | -1.2104263 |
| C | -2.0808847 | -2.5354599 | -3.1014003 |
| H | -3.0936304 | -2.4967741 | -2.7050330 |
| C | -1.8558697 | -2.8558213 | -4.4408463 |
| H | -2.6966377 | -3.0682886 | -5.1007044 |
| C | -0.5488658 | -2.9214596 | -4.9327524 |
| H | -0.3673378 | -3.1983822 | -5.9709832 |
| C | 0.5282869  | -2.6446741 | -4.0910897 |
| H | 1.5454712  | -2.7350956 | -4.4719300 |
| C | 3.0050811  | -2.9999787 | -1.9954496 |
| C | 2.7069198  | -4.3458742 | -2.2521722 |
| H | 1.6706962  | -4.6625402 | -2.3503566 |
| C | 3.7356528  | -5.2785488 | -2.3738303 |
| H | 3.4956523  | -6.3236291 | -2.5644458 |
| C | 5.0671109  | -4.8749326 | -2.2473656 |
| H | 5.8694517  | -5.6060769 | -2.3417701 |
| C | 5.3708639  | -3.5312580 | -2.0136654 |
| H | 6.4090387  | -3.2101818 | -1.9346022 |
| C | 4.3442598  | -2.5952416 | -1.8924003 |
| H | 4.5828999  | -1.5434355 | -1.7350573 |
| C | -1.3876102 | 1.5955084  | 0.4481758  |
| P | -0.6944935 | 2.9756914  | 1.0979751  |
| C | -1.8769380 | 4.1485390  | 1.8283850  |
| C | -2.9725559 | 3.6248214  | 2.5339193  |
| H | -3.0886490 | 2.5440623  | 2.6114899  |
| C | -3.9176934 | 4.4813769  | 3.0937891  |
| H | -4.7719357 | 4.0686813  | 3.6290165  |
| C | -3.7787026 | 5.8651059  | 2.9531774  |
| H | -4.5230412 | 6.5336457  | 3.3848113  |
| C | -2.6917726 | 6.3898951  | 2.2516707  |
| H | -2.5853067 | 7.4680363  | 2.1347803  |
| C | -1.7414979 | 5.5359454  | 1.6895213  |
| H | -0.9047477 | 5.9497682  | 1.1289805  |
| C | 0.3427564  | 3.9649902  | -0.0331539 |
| C | 1.3679556  | 4.8045973  | 0.4294836  |
| H | 1.5900527  | 4.8584795  | 1.4953478  |
| C | 2.1079610  | 5.5665801  | -0.4763291 |
| H | 2.9043083  | 6.2163989  | -0.1140339 |
| C | 1.8257451  | 5.4990087  | -1.8444661 |
| H | 2.4032871  | 6.0981961  | -2.5482079 |
| C | 0.8109232  | 4.6585748  | -2.3080564 |
| H | 0.5982733  | 4.5887021  | -3.3742975 |
| C | 0.0768065  | 3.8899124  | -1.4052053 |
| H | -0.6918036 | 3.2069854  | -1.7639693 |
| C | 0.4500714  | 2.4997534  | 2.4379621  |
| C | 0.0377045  | 2.4975770  | 3.7756535  |
| H | -0.9418731 | 2.8920430  | 4.0435953  |



|   |            |            |            |
|---|------------|------------|------------|
| C | 0.8820038  | 1.9918461  | 4.7684261  |
| H | 0.5532661  | 1.9912852  | 5.8073562  |
| C | 2.1407292  | 1.4903224  | 4.4319176  |
| H | 2.7946580  | 1.0871520  | 5.2040805  |
| C | 2.5665331  | 1.5090915  | 3.1006027  |
| H | 3.5484936  | 1.1208047  | 2.8355271  |
| C | 1.7267009  | 2.0140395  | 2.1092727  |
| H | 2.0581330  | 2.0367370  | 1.0727230  |
| P | -2.7561294 | 1.3665514  | -0.4982267 |
| C | -2.4958447 | 1.3095300  | -2.3116669 |
| C | -3.5550547 | 1.5740473  | -3.1945361 |
| H | -4.5232348 | 1.8889749  | -2.8048843 |
| C | -3.3685051 | 1.4510875  | -4.5724851 |
| H | -4.1959192 | 1.6586630  | -5.2506579 |
| C | -2.1232467 | 1.0702797  | -5.0795543 |
| H | -1.9798907 | 0.9718751  | -6.1553487 |
| C | -1.0607392 | 0.8275392  | -4.2064886 |
| H | -0.0844153 | 0.5383266  | -4.5908656 |
| C | -1.2450619 | 0.9480468  | -2.8307649 |
| H | -0.4120396 | 0.7635331  | -2.1486517 |
| C | -4.0833739 | 2.5845892  | -0.2779634 |
| C | -3.8600891 | 3.9059127  | -0.6979657 |
| H | -2.9364938 | 4.1650599  | -1.2163956 |
| C | -4.8115398 | 4.8900286  | -0.4423461 |
| H | -4.6275186 | 5.9160460  | -0.7582017 |
| C | -5.9969082 | 4.5612970  | 0.2227800  |
| H | -6.7401978 | 5.3327876  | 0.4213671  |
| C | -6.2284313 | 3.2467996  | 0.6310219  |
| H | -7.1539824 | 2.9883561  | 1.1447842  |
| C | -5.2723594 | 2.2589217  | 0.3865079  |
| H | -5.4477467 | 1.2351591  | 0.7149109  |
| C | -3.4887390 | -0.2626469 | -0.1179891 |
| C | -4.4198953 | -0.8684180 | -0.9731549 |
| H | -4.7203104 | -0.3729616 | -1.8955748 |
| C | -4.9496718 | -2.1200902 | -0.6552437 |
| H | -5.6740569 | -2.5865464 | -1.3227839 |
| C | -4.5423474 | -2.7789536 | 0.5086206  |
| H | -4.9463441 | -3.7629840 | 0.7458631  |
| C | -3.6208523 | -2.1741598 | 1.3670464  |
| H | -3.2966444 | -2.6783320 | 2.2763725  |
| C | -3.1033952 | -0.9153925 | 1.0603388  |
| H | -2.3834523 | -0.4323422 | 1.7206107  |

SCF energy GEOOPT = -4370.177913838 H  
 ZPE = 2850. kJ/mol  
 FREEH energy = 3038.89 kJ/mol  
 FREEH entropy = 1.62969 kJ/mol/K

\$vibrational spectrum

| # | mode | symmetry | wave number | IR intensity | selection rules |       |
|---|------|----------|-------------|--------------|-----------------|-------|
| # |      |          | cm** (-1)   | km/mol       | IR              | RAMAN |
|   | 1    |          | -0.00       | 0.00000      | -               | -     |
|   | 2    |          | -0.00       | 0.00000      | -               | -     |
|   | 3    |          | 0.00        | 0.00000      | -               | -     |
|   | 4    |          | 0.00        | 0.00000      | -               | -     |
|   | 5    |          | 0.00        | 0.00000      | -               | -     |
|   | 6    |          | 0.00        | 0.00000      | -               | -     |
|   | 7    | a        | 13.12       | 0.03000      | YES             | YES   |

|    |   |        |         |     |     |
|----|---|--------|---------|-----|-----|
| 8  | a | 18.05  | 0.04195 | YES | YES |
| 9  | a | 21.41  | 0.03428 | YES | YES |
| 10 | a | 22.58  | 0.04510 | YES | YES |
| 11 | a | 24.98  | 0.02265 | YES | YES |
| 12 | a | 27.75  | 0.09986 | YES | YES |
| 13 | a | 34.35  | 0.32878 | YES | YES |
| 14 | a | 37.90  | 0.14942 | YES | YES |
| 15 | a | 39.67  | 0.05477 | YES | YES |
| 16 | a | 42.12  | 0.02009 | YES | YES |
| 17 | a | 42.36  | 0.18340 | YES | YES |
| 18 | a | 44.64  | 0.07223 | YES | YES |
| 19 | a | 48.69  | 0.01139 | YES | YES |
| 20 | a | 50.50  | 0.02204 | YES | YES |
| 21 | a | 52.46  | 0.06539 | YES | YES |
| 22 | a | 52.62  | 0.16274 | YES | YES |
| 23 | a | 55.52  | 0.13122 | YES | YES |
| 24 | a | 58.95  | 0.03790 | YES | YES |
| 25 | a | 59.50  | 0.15275 | YES | YES |
| 26 | a | 62.87  | 0.19841 | YES | YES |
| 27 | a | 65.68  | 0.04277 | YES | YES |
| 28 | a | 68.11  | 0.01870 | YES | YES |
| 29 | a | 68.95  | 0.01610 | YES | YES |
| 30 | a | 72.17  | 0.11166 | YES | YES |
| 31 | a | 72.74  | 0.05149 | YES | YES |
| 32 | a | 74.07  | 0.01707 | YES | YES |
| 33 | a | 79.78  | 0.08327 | YES | YES |
| 34 | a | 81.64  | 0.07905 | YES | YES |
| 35 | a | 82.95  | 0.19127 | YES | YES |
| 36 | a | 84.45  | 0.09487 | YES | YES |
| 37 | a | 86.76  | 0.10211 | YES | YES |
| 38 | a | 89.34  | 0.03269 | YES | YES |
| 39 | a | 92.51  | 0.06504 | YES | YES |
| 40 | a | 95.41  | 0.08546 | YES | YES |
| 41 | a | 96.77  | 0.32311 | YES | YES |
| 42 | a | 101.74 | 0.14713 | YES | YES |
| 43 | a | 103.61 | 0.10590 | YES | YES |
| 44 | a | 106.33 | 0.12101 | YES | YES |
| 45 | a | 111.62 | 0.05041 | YES | YES |
| 46 | a | 112.13 | 0.07636 | YES | YES |
| 47 | a | 117.99 | 0.09942 | YES | YES |
| 48 | a | 120.66 | 0.18892 | YES | YES |
| 49 | a | 136.49 | 1.06418 | YES | YES |
| 50 | a | 181.10 | 0.93652 | YES | YES |
| 51 | a | 182.47 | 1.04925 | YES | YES |
| 52 | a | 188.04 | 0.50243 | YES | YES |
| 53 | a | 192.60 | 1.14682 | YES | YES |
| 54 | a | 194.61 | 1.93266 | YES | YES |
| 55 | a | 202.07 | 1.26120 | YES | YES |
| 56 | a | 204.77 | 2.02327 | YES | YES |
| 57 | a | 213.15 | 1.62915 | YES | YES |
| 58 | a | 214.74 | 0.16451 | YES | YES |
| 59 | a | 222.48 | 0.44293 | YES | YES |
| 60 | a | 226.32 | 0.85009 | YES | YES |
| 61 | a | 229.06 | 0.55348 | YES | YES |
| 62 | a | 231.85 | 0.21866 | YES | YES |
| 63 | a | 233.39 | 0.91503 | YES | YES |
| 64 | a | 241.92 | 1.24644 | YES | YES |
| 65 | a | 243.95 | 0.30031 | YES | YES |

|     |   |        |          |     |     |
|-----|---|--------|----------|-----|-----|
| 66  | a | 245.99 | 0.75619  | YES | YES |
| 67  | a | 247.87 | 1.27901  | YES | YES |
| 68  | a | 252.75 | 0.58991  | YES | YES |
| 69  | a | 253.41 | 0.46650  | YES | YES |
| 70  | a | 260.00 | 0.16765  | YES | YES |
| 71  | a | 262.79 | 0.50299  | YES | YES |
| 72  | a | 267.93 | 0.79722  | YES | YES |
| 73  | a | 269.53 | 0.77049  | YES | YES |
| 74  | a | 271.57 | 0.13732  | YES | YES |
| 75  | a | 272.50 | 0.37053  | YES | YES |
| 76  | a | 308.24 | 3.73680  | YES | YES |
| 77  | a | 324.31 | 6.11063  | YES | YES |
| 78  | a | 383.97 | 27.38512 | YES | YES |
| 79  | a | 385.68 | 21.52295 | YES | YES |
| 80  | a | 388.21 | 3.54161  | YES | YES |
| 81  | a | 388.82 | 0.08033  | YES | YES |
| 82  | a | 389.76 | 1.94351  | YES | YES |
| 83  | a | 390.55 | 0.05911  | YES | YES |
| 84  | a | 393.66 | 0.63276  | YES | YES |
| 85  | a | 395.71 | 0.04446  | YES | YES |
| 86  | a | 396.43 | 1.13925  | YES | YES |
| 87  | a | 399.19 | 0.09103  | YES | YES |
| 88  | a | 399.83 | 0.19537  | YES | YES |
| 89  | a | 401.13 | 0.64768  | YES | YES |
| 90  | a | 402.17 | 0.10728  | YES | YES |
| 91  | a | 404.71 | 0.19599  | YES | YES |
| 92  | a | 425.52 | 0.95552  | YES | YES |
| 93  | a | 429.48 | 5.74010  | YES | YES |
| 94  | a | 435.79 | 8.95931  | YES | YES |
| 95  | a | 436.53 | 1.73797  | YES | YES |
| 96  | a | 440.92 | 1.09462  | YES | YES |
| 97  | a | 442.52 | 5.61142  | YES | YES |
| 98  | a | 443.73 | 1.23615  | YES | YES |
| 99  | a | 447.37 | 7.63848  | YES | YES |
| 100 | a | 459.64 | 4.49260  | YES | YES |
| 101 | a | 459.82 | 12.76903 | YES | YES |
| 102 | a | 494.15 | 67.35341 | YES | YES |
| 103 | a | 498.90 | 89.02039 | YES | YES |
| 104 | a | 501.28 | 8.70163  | YES | YES |
| 105 | a | 503.12 | 99.78385 | YES | YES |
| 106 | a | 506.70 | 36.08457 | YES | YES |
| 107 | a | 509.25 | 42.95155 | YES | YES |
| 108 | a | 511.94 | 56.02682 | YES | YES |
| 109 | a | 512.41 | 66.20630 | YES | YES |
| 110 | a | 518.34 | 7.56915  | YES | YES |
| 111 | a | 519.18 | 32.58727 | YES | YES |
| 112 | a | 563.18 | 4.32090  | YES | YES |
| 113 | a | 567.86 | 27.24040 | YES | YES |
| 114 | a | 613.29 | 0.20177  | YES | YES |
| 115 | a | 613.54 | 0.00376  | YES | YES |
| 116 | a | 614.20 | 0.27490  | YES | YES |
| 117 | a | 614.56 | 0.35919  | YES | YES |
| 118 | a | 614.84 | 0.21492  | YES | YES |
| 119 | a | 614.99 | 0.14368  | YES | YES |
| 120 | a | 615.24 | 0.29840  | YES | YES |
| 121 | a | 615.81 | 0.12259  | YES | YES |
| 122 | a | 616.04 | 0.32213  | YES | YES |
| 123 | a | 616.25 | 0.07568  | YES | YES |

|     |   |        |           |     |     |
|-----|---|--------|-----------|-----|-----|
| 124 | a | 616.96 | 0.65262   | YES | YES |
| 125 | a | 617.92 | 0.25519   | YES | YES |
| 126 | a | 675.27 | 15.15232  | YES | YES |
| 127 | a | 677.29 | 10.09581  | YES | YES |
| 128 | a | 681.96 | 3.94374   | YES | YES |
| 129 | a | 682.24 | 6.02279   | YES | YES |
| 130 | a | 688.05 | 64.95001  | YES | YES |
| 131 | a | 690.27 | 50.77359  | YES | YES |
| 132 | a | 690.96 | 56.91365  | YES | YES |
| 133 | a | 691.98 | 20.46373  | YES | YES |
| 134 | a | 693.62 | 22.32596  | YES | YES |
| 135 | a | 694.16 | 7.50589   | YES | YES |
| 136 | a | 694.66 | 25.55922  | YES | YES |
| 137 | a | 695.22 | 43.93063  | YES | YES |
| 138 | a | 696.52 | 27.15177  | YES | YES |
| 139 | a | 697.44 | 22.95154  | YES | YES |
| 140 | a | 698.68 | 7.85566   | YES | YES |
| 141 | a | 699.84 | 3.57272   | YES | YES |
| 142 | a | 704.76 | 19.09580  | YES | YES |
| 143 | a | 705.38 | 29.74022  | YES | YES |
| 144 | a | 708.09 | 21.80406  | YES | YES |
| 145 | a | 709.63 | 8.95179   | YES | YES |
| 146 | a | 711.23 | 45.21475  | YES | YES |
| 147 | a | 711.59 | 15.66190  | YES | YES |
| 148 | a | 712.41 | 28.03927  | YES | YES |
| 149 | a | 712.97 | 6.71406   | YES | YES |
| 150 | a | 734.40 | 32.70956  | YES | YES |
| 151 | a | 735.13 | 6.19768   | YES | YES |
| 152 | a | 736.07 | 33.84605  | YES | YES |
| 153 | a | 737.05 | 25.41127  | YES | YES |
| 154 | a | 738.16 | 17.22803  | YES | YES |
| 155 | a | 739.49 | 80.29188  | YES | YES |
| 156 | a | 741.14 | 10.52074  | YES | YES |
| 157 | a | 742.57 | 10.14616  | YES | YES |
| 158 | a | 744.98 | 8.66428   | YES | YES |
| 159 | a | 745.57 | 3.90924   | YES | YES |
| 160 | a | 745.70 | 2.94227   | YES | YES |
| 161 | a | 747.10 | 10.76060  | YES | YES |
| 162 | a | 789.62 | 296.06213 | YES | YES |
| 163 | a | 812.75 | 99.07569  | YES | YES |
| 164 | a | 828.32 | 1.15428   | YES | YES |
| 165 | a | 831.19 | 1.09727   | YES | YES |
| 166 | a | 834.31 | 0.31911   | YES | YES |
| 167 | a | 834.76 | 1.46546   | YES | YES |
| 168 | a | 836.81 | 0.02634   | YES | YES |
| 169 | a | 840.15 | 1.31201   | YES | YES |
| 170 | a | 841.23 | 0.23111   | YES | YES |
| 171 | a | 841.66 | 1.16948   | YES | YES |
| 172 | a | 842.75 | 0.81586   | YES | YES |
| 173 | a | 844.08 | 1.18568   | YES | YES |
| 174 | a | 846.42 | 1.26424   | YES | YES |
| 175 | a | 847.63 | 0.23102   | YES | YES |
| 176 | a | 905.23 | 0.21419   | YES | YES |
| 177 | a | 908.24 | 1.84410   | YES | YES |
| 178 | a | 909.65 | 0.65362   | YES | YES |
| 179 | a | 910.37 | 0.46551   | YES | YES |
| 180 | a | 914.24 | 2.23617   | YES | YES |
| 181 | a | 916.86 | 0.37814   | YES | YES |

|     |   |         |         |     |     |
|-----|---|---------|---------|-----|-----|
| 182 | a | 916.96  | 0.30813 | YES | YES |
| 183 | a | 918.93  | 0.27312 | YES | YES |
| 184 | a | 919.02  | 0.17072 | YES | YES |
| 185 | a | 919.92  | 0.71638 | YES | YES |
| 186 | a | 922.59  | 0.67823 | YES | YES |
| 187 | a | 923.78  | 0.44247 | YES | YES |
| 188 | a | 956.27  | 0.18154 | YES | YES |
| 189 | a | 958.43  | 0.49246 | YES | YES |
| 190 | a | 960.23  | 1.04932 | YES | YES |
| 191 | a | 960.61  | 0.16290 | YES | YES |
| 192 | a | 962.55  | 0.07187 | YES | YES |
| 193 | a | 965.06  | 0.19978 | YES | YES |
| 194 | a | 965.18  | 0.26544 | YES | YES |
| 195 | a | 966.27  | 0.22878 | YES | YES |
| 196 | a | 966.92  | 0.17638 | YES | YES |
| 197 | a | 967.53  | 0.11228 | YES | YES |
| 198 | a | 969.70  | 0.19425 | YES | YES |
| 199 | a | 970.35  | 0.52258 | YES | YES |
| 200 | a | 980.08  | 0.13956 | YES | YES |
| 201 | a | 981.18  | 0.63804 | YES | YES |
| 202 | a | 981.56  | 0.45471 | YES | YES |
| 203 | a | 981.63  | 0.76017 | YES | YES |
| 204 | a | 982.88  | 0.17729 | YES | YES |
| 205 | a | 983.51  | 0.31409 | YES | YES |
| 206 | a | 983.70  | 0.11761 | YES | YES |
| 207 | a | 984.44  | 0.04903 | YES | YES |
| 208 | a | 985.38  | 0.07354 | YES | YES |
| 209 | a | 985.81  | 0.10246 | YES | YES |
| 210 | a | 986.46  | 0.30932 | YES | YES |
| 211 | a | 987.71  | 0.19943 | YES | YES |
| 212 | a | 997.72  | 0.42536 | YES | YES |
| 213 | a | 997.93  | 2.17503 | YES | YES |
| 214 | a | 998.20  | 0.89961 | YES | YES |
| 215 | a | 998.43  | 1.29068 | YES | YES |
| 216 | a | 998.46  | 7.67624 | YES | YES |
| 217 | a | 998.79  | 3.72849 | YES | YES |
| 218 | a | 998.85  | 0.72259 | YES | YES |
| 219 | a | 999.40  | 7.42784 | YES | YES |
| 220 | a | 999.69  | 2.71511 | YES | YES |
| 221 | a | 1000.39 | 1.07081 | YES | YES |
| 222 | a | 1001.42 | 3.80836 | YES | YES |
| 223 | a | 1002.45 | 1.72176 | YES | YES |
| 224 | a | 1024.34 | 1.32332 | YES | YES |
| 225 | a | 1024.69 | 1.37718 | YES | YES |
| 226 | a | 1024.97 | 4.70079 | YES | YES |
| 227 | a | 1025.65 | 1.51139 | YES | YES |
| 228 | a | 1026.00 | 1.30432 | YES | YES |
| 229 | a | 1026.18 | 2.06402 | YES | YES |
| 230 | a | 1026.46 | 1.17372 | YES | YES |
| 231 | a | 1026.85 | 1.03375 | YES | YES |
| 232 | a | 1026.90 | 3.23298 | YES | YES |
| 233 | a | 1027.37 | 1.25690 | YES | YES |
| 234 | a | 1027.72 | 2.12158 | YES | YES |
| 235 | a | 1029.20 | 1.14891 | YES | YES |
| 236 | a | 1071.67 | 1.61987 | YES | YES |
| 237 | a | 1072.70 | 7.54173 | YES | YES |
| 238 | a | 1073.25 | 5.30245 | YES | YES |
| 239 | a | 1073.83 | 3.65350 | YES | YES |

|     |   |         |           |     |     |
|-----|---|---------|-----------|-----|-----|
| 240 | a | 1075.66 | 0.18796   | YES | YES |
| 241 | a | 1076.80 | 0.11909   | YES | YES |
| 242 | a | 1077.21 | 3.97651   | YES | YES |
| 243 | a | 1078.01 | 3.03189   | YES | YES |
| 244 | a | 1079.19 | 2.59818   | YES | YES |
| 245 | a | 1079.37 | 2.10193   | YES | YES |
| 246 | a | 1079.86 | 1.09057   | YES | YES |
| 247 | a | 1080.78 | 4.62902   | YES | YES |
| 248 | a | 1085.95 | 23.89711  | YES | YES |
| 249 | a | 1087.17 | 19.85199  | YES | YES |
| 250 | a | 1090.17 | 29.83965  | YES | YES |
| 251 | a | 1091.46 | 37.59742  | YES | YES |
| 252 | a | 1092.92 | 16.65038  | YES | YES |
| 253 | a | 1093.96 | 13.97494  | YES | YES |
| 254 | a | 1095.00 | 32.63772  | YES | YES |
| 255 | a | 1095.76 | 26.67444  | YES | YES |
| 256 | a | 1097.37 | 22.14049  | YES | YES |
| 257 | a | 1098.29 | 28.14597  | YES | YES |
| 258 | a | 1099.13 | 79.02078  | YES | YES |
| 259 | a | 1101.20 | 51.20389  | YES | YES |
| 260 | a | 1152.25 | 0.86231   | YES | YES |
| 261 | a | 1152.62 | 2.97278   | YES | YES |
| 262 | a | 1153.16 | 0.98721   | YES | YES |
| 263 | a | 1153.53 | 0.38671   | YES | YES |
| 264 | a | 1153.69 | 0.59849   | YES | YES |
| 265 | a | 1153.85 | 0.70403   | YES | YES |
| 266 | a | 1154.29 | 0.43083   | YES | YES |
| 267 | a | 1154.77 | 0.37683   | YES | YES |
| 268 | a | 1155.35 | 1.19097   | YES | YES |
| 269 | a | 1155.69 | 0.20133   | YES | YES |
| 270 | a | 1156.08 | 0.10455   | YES | YES |
| 271 | a | 1156.44 | 1.22768   | YES | YES |
| 272 | a | 1169.28 | 2.24935   | YES | YES |
| 273 | a | 1170.49 | 24.13295  | YES | YES |
| 274 | a | 1170.85 | 2.98280   | YES | YES |
| 275 | a | 1171.06 | 31.12988  | YES | YES |
| 276 | a | 1173.21 | 19.33820  | YES | YES |
| 277 | a | 1173.82 | 13.32581  | YES | YES |
| 278 | a | 1174.51 | 8.16605   | YES | YES |
| 279 | a | 1174.81 | 2.11494   | YES | YES |
| 280 | a | 1176.30 | 13.04023  | YES | YES |
| 281 | a | 1176.99 | 4.97710   | YES | YES |
| 282 | a | 1178.11 | 2.27921   | YES | YES |
| 283 | a | 1179.44 | 2.84626   | YES | YES |
| 284 | a | 1198.32 | 294.58568 | YES | YES |
| 285 | a | 1204.27 | 672.73363 | YES | YES |
| 286 | a | 1289.57 | 2.13188   | YES | YES |
| 287 | a | 1292.17 | 2.39181   | YES | YES |
| 288 | a | 1294.20 | 5.30742   | YES | YES |
| 289 | a | 1295.19 | 3.71466   | YES | YES |
| 290 | a | 1296.95 | 3.36790   | YES | YES |
| 291 | a | 1297.91 | 4.63165   | YES | YES |
| 292 | a | 1298.28 | 2.47853   | YES | YES |
| 293 | a | 1299.41 | 4.64641   | YES | YES |
| 294 | a | 1301.82 | 1.87355   | YES | YES |
| 295 | a | 1302.02 | 1.97774   | YES | YES |
| 296 | a | 1302.63 | 3.42687   | YES | YES |
| 297 | a | 1303.12 | 1.79182   | YES | YES |

|     |   |         |          |     |     |
|-----|---|---------|----------|-----|-----|
| 298 | a | 1335.50 | 0.23406  | YES | YES |
| 299 | a | 1335.64 | 0.49360  | YES | YES |
| 300 | a | 1335.99 | 0.72770  | YES | YES |
| 301 | a | 1336.67 | 1.05966  | YES | YES |
| 302 | a | 1337.90 | 0.48717  | YES | YES |
| 303 | a | 1338.15 | 0.16472  | YES | YES |
| 304 | a | 1338.33 | 0.30498  | YES | YES |
| 305 | a | 1338.98 | 0.96653  | YES | YES |
| 306 | a | 1339.12 | 0.04936  | YES | YES |
| 307 | a | 1339.40 | 0.02921  | YES | YES |
| 308 | a | 1339.71 | 0.25733  | YES | YES |
| 309 | a | 1340.55 | 0.56425  | YES | YES |
| 310 | a | 1424.63 | 22.42169 | YES | YES |
| 311 | a | 1425.29 | 11.19251 | YES | YES |
| 312 | a | 1426.06 | 9.93244  | YES | YES |
| 313 | a | 1426.33 | 17.22228 | YES | YES |
| 314 | a | 1428.69 | 22.45489 | YES | YES |
| 315 | a | 1428.94 | 2.51176  | YES | YES |
| 316 | a | 1428.99 | 12.78536 | YES | YES |
| 317 | a | 1429.49 | 18.35224 | YES | YES |
| 318 | a | 1430.49 | 21.08170 | YES | YES |
| 319 | a | 1430.77 | 12.87302 | YES | YES |
| 320 | a | 1431.42 | 5.89345  | YES | YES |
| 321 | a | 1431.46 | 29.12234 | YES | YES |
| 322 | a | 1468.00 | 7.98559  | YES | YES |
| 323 | a | 1468.38 | 3.08372  | YES | YES |
| 324 | a | 1470.09 | 7.38428  | YES | YES |
| 325 | a | 1470.92 | 8.02508  | YES | YES |
| 326 | a | 1471.20 | 2.72587  | YES | YES |
| 327 | a | 1471.80 | 2.64642  | YES | YES |
| 328 | a | 1472.02 | 11.25506 | YES | YES |
| 329 | a | 1472.26 | 1.09605  | YES | YES |
| 330 | a | 1472.81 | 6.26400  | YES | YES |
| 331 | a | 1473.60 | 7.17626  | YES | YES |
| 332 | a | 1473.76 | 2.92371  | YES | YES |
| 333 | a | 1474.06 | 7.07707  | YES | YES |
| 334 | a | 1567.73 | 2.27801  | YES | YES |
| 335 | a | 1567.96 | 0.35028  | YES | YES |
| 336 | a | 1568.26 | 0.53903  | YES | YES |
| 337 | a | 1568.92 | 0.12939  | YES | YES |
| 338 | a | 1570.30 | 0.37234  | YES | YES |
| 339 | a | 1570.73 | 0.07350  | YES | YES |
| 340 | a | 1570.81 | 0.04936  | YES | YES |
| 341 | a | 1571.12 | 1.08492  | YES | YES |
| 342 | a | 1571.46 | 0.89391  | YES | YES |
| 343 | a | 1571.91 | 0.87547  | YES | YES |
| 344 | a | 1572.09 | 0.62248  | YES | YES |
| 345 | a | 1572.15 | 0.06614  | YES | YES |
| 346 | a | 1581.70 | 0.46082  | YES | YES |
| 347 | a | 1582.44 | 1.77833  | YES | YES |
| 348 | a | 1582.88 | 0.77898  | YES | YES |
| 349 | a | 1583.34 | 1.20491  | YES | YES |
| 350 | a | 1583.85 | 0.73106  | YES | YES |
| 351 | a | 1584.61 | 0.37564  | YES | YES |
| 352 | a | 1584.69 | 0.73685  | YES | YES |
| 353 | a | 1584.80 | 0.20025  | YES | YES |
| 354 | a | 1584.95 | 0.60585  | YES | YES |
| 355 | a | 1585.03 | 0.80771  | YES | YES |

|     |   |         |          |     |     |
|-----|---|---------|----------|-----|-----|
| 356 | a | 1585.95 | 0.22629  | YES | YES |
| 357 | a | 1586.54 | 0.12405  | YES | YES |
| 358 | a | 3055.31 | 1.66577  | YES | YES |
| 359 | a | 3079.03 | 1.10834  | YES | YES |
| 360 | a | 3093.48 | 0.62587  | YES | YES |
| 361 | a | 3096.44 | 0.84348  | YES | YES |
| 362 | a | 3097.16 | 0.18613  | YES | YES |
| 363 | a | 3098.79 | 1.63622  | YES | YES |
| 364 | a | 3099.09 | 0.26485  | YES | YES |
| 365 | a | 3099.72 | 0.30412  | YES | YES |
| 366 | a | 3099.82 | 1.17893  | YES | YES |
| 367 | a | 3100.51 | 0.60335  | YES | YES |
| 368 | a | 3101.02 | 0.18536  | YES | YES |
| 369 | a | 3101.55 | 0.18733  | YES | YES |
| 370 | a | 3102.74 | 0.39674  | YES | YES |
| 371 | a | 3104.05 | 0.70834  | YES | YES |
| 372 | a | 3104.35 | 0.79745  | YES | YES |
| 373 | a | 3104.83 | 0.18226  | YES | YES |
| 374 | a | 3105.81 | 0.12732  | YES | YES |
| 375 | a | 3106.19 | 0.67867  | YES | YES |
| 376 | a | 3106.73 | 0.12818  | YES | YES |
| 377 | a | 3107.02 | 2.47108  | YES | YES |
| 378 | a | 3107.73 | 4.23911  | YES | YES |
| 379 | a | 3108.11 | 1.50715  | YES | YES |
| 380 | a | 3109.10 | 0.76058  | YES | YES |
| 381 | a | 3109.22 | 2.77565  | YES | YES |
| 382 | a | 3109.84 | 3.21389  | YES | YES |
| 383 | a | 3111.82 | 3.93894  | YES | YES |
| 384 | a | 3112.85 | 1.45396  | YES | YES |
| 385 | a | 3114.09 | 3.29439  | YES | YES |
| 386 | a | 3114.13 | 2.97158  | YES | YES |
| 387 | a | 3114.27 | 1.92094  | YES | YES |
| 388 | a | 3114.41 | 7.31979  | YES | YES |
| 389 | a | 3115.86 | 1.45822  | YES | YES |
| 390 | a | 3116.55 | 7.71794  | YES | YES |
| 391 | a | 3116.72 | 1.60550  | YES | YES |
| 392 | a | 3118.33 | 3.48540  | YES | YES |
| 393 | a | 3118.37 | 1.04925  | YES | YES |
| 394 | a | 3120.89 | 2.14357  | YES | YES |
| 395 | a | 3121.13 | 1.92875  | YES | YES |
| 396 | a | 3121.68 | 12.09742 | YES | YES |
| 397 | a | 3121.90 | 4.83155  | YES | YES |
| 398 | a | 3122.03 | 6.72981  | YES | YES |
| 399 | a | 3122.40 | 8.38183  | YES | YES |
| 400 | a | 3123.57 | 7.43453  | YES | YES |
| 401 | a | 3124.84 | 2.53029  | YES | YES |
| 402 | a | 3125.02 | 13.73626 | YES | YES |
| 403 | a | 3125.55 | 7.06149  | YES | YES |
| 404 | a | 3125.81 | 3.75611  | YES | YES |
| 405 | a | 3126.26 | 8.59085  | YES | YES |
| 406 | a | 3127.74 | 13.55444 | YES | YES |
| 407 | a | 3128.78 | 12.53512 | YES | YES |
| 408 | a | 3129.40 | 10.66722 | YES | YES |
| 409 | a | 3129.67 | 16.40239 | YES | YES |
| 410 | a | 3129.93 | 4.10983  | YES | YES |
| 411 | a | 3130.36 | 23.91589 | YES | YES |
| 412 | a | 3130.64 | 10.31000 | YES | YES |
| 413 | a | 3131.74 | 13.39614 | YES | YES |



|     |   |         |         |     |     |
|-----|---|---------|---------|-----|-----|
| 414 | a | 3132.94 | 5.98752 | YES | YES |
| 415 | a | 3133.59 | 6.68767 | YES | YES |
| 416 | a | 3134.25 | 3.90289 | YES | YES |
| 417 | a | 3135.08 | 8.50122 | YES | YES |

Şend

## 8.14 [Al(OC(CF<sub>3</sub>)<sub>3</sub>)<sub>4</sub>]<sup>-</sup>

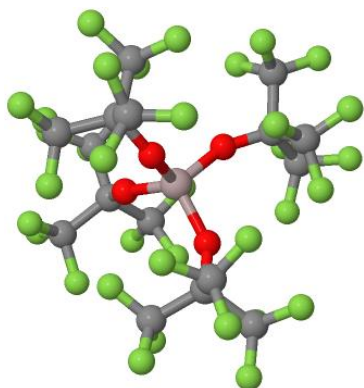

Method: (RI-)BP86 (D3BJ) /def2-TZVPP  
Symmetry: c1

Cartesian coordinates in Ångström:

|    |            |            |            |
|----|------------|------------|------------|
| Al | -0.3538979 | 0.1565687  | -0.1776142 |
| O  | -0.3651207 | -1.4200661 | -0.9385292 |
| O  | 1.3077435  | 0.4931415  | 0.2588694  |
| O  | -0.9052459 | 1.4480779  | -1.2199807 |
| O  | -1.4478824 | 0.0704481  | 1.1875528  |
| C  | 2.4787280  | 0.0170572  | 0.7294964  |
| F  | 2.1732888  | -2.3863041 | 0.6888456  |
| C  | 2.3003778  | -1.3368540 | 1.5299149  |
| C  | -0.6357213 | 2.3208140  | -2.2115072 |
| F  | -2.0370396 | 1.3641571  | -3.9357280 |
| C  | -2.1495954 | 0.7597648  | 2.1105070  |
| F  | -3.1767061 | 0.3060471  | 4.2896849  |
| C  | -1.1056434 | -2.4678983 | -1.3529385 |
| F  | 1.7605367  | 2.1181859  | -2.4977573 |
| C  | 0.5831901  | 1.8529584  | -3.1058013 |
| F  | 0.6080092  | 2.4605589  | -4.3208766 |
| F  | 0.5239198  | 0.5239350  | -3.3124793 |
| C  | -1.9218542 | 2.4427852  | -3.1258117 |
| F  | -1.9009519 | 3.5466442  | -3.9192826 |
| F  | -3.0344141 | 2.5031530  | -2.3733626 |
| C  | -0.3008540 | 3.7421243  | -1.6010587 |
| F  | 0.2672368  | 4.5807011  | -2.5087016 |
| F  | -1.4215301 | 4.3470653  | -1.1413137 |
| F  | 0.5473965  | 3.6210674  | -0.5662757 |
| F  | 4.5447235  | -0.9994677 | -0.1127905 |
| F  | 1.1875785  | -1.2843179 | 2.2861813  |
| F  | 3.3481326  | -1.6018011 | 2.3539075  |
| C  | 3.4801148  | -0.2325445 | -0.4706422 |
| F  | 3.9706807  | 0.9375918  | -0.9436404 |
| F  | 2.8517575  | -0.8487838 | -1.4861130 |
| F  | 2.9621223  | 2.3361913  | 1.1759681  |

|   |            |            |            |
|---|------------|------------|------------|
| C | 3.0998280  | 1.1042342  | 1.6970569  |
| F | 2.4678063  | 1.0965163  | 2.8940521  |
| F | 4.4235227  | 0.9032641  | 1.9345091  |
| F | -3.9163509 | 0.8314247  | 0.4759204  |
| C | -3.3354219 | 1.5674902  | 1.4394931  |
| F | -4.3013684 | 1.9151982  | 2.3330737  |
| F | -2.8849524 | 2.7075209  | 0.8718573  |
| F | -3.2036503 | -2.9614390 | -2.5230925 |
| C | -2.2583411 | -2.0049851 | -2.3302931 |
| F | -2.8745599 | -0.9135603 | -1.8369723 |
| F | -1.7598515 | -1.6780030 | -3.5441855 |
| F | -0.8243920 | -4.3731859 | -2.8710306 |
| C | -0.1459671 | -3.4604235 | -2.1256851 |
| F | 0.6350325  | -4.1466107 | -1.2587251 |
| F | 0.6687284  | -2.7835276 | -2.9541291 |
| F | -0.8815806 | -3.3036117 | 0.8952258  |
| C | -1.7533767 | -3.2329801 | -0.1258270 |
| F | -2.8558728 | -2.5905232 | 0.3183296  |
| F | -2.1252826 | -4.5038582 | -0.4398313 |
| F | -1.9249878 | 2.6962223  | 3.5997257  |
| C | -2.7587589 | -0.2803365 | 3.1361237  |
| F | -1.8482589 | -1.2148682 | 3.4606249  |
| F | -3.8247346 | -0.9195965 | 2.6001132  |
| C | -1.2231397 | 1.7694483  | 2.8977182  |
| F | -0.4206947 | 2.4282507  | 2.0387580  |
| F | -0.4296921 | 1.1122640  | 3.7736550  |

SCF energy GEOOPT = -4750.100769695 H

ZPE = 556.1 kJ/mol

FREEH energy = 704.29 kJ/mol

FREEH entropy = 1.36309 kJ/mol/K

\$vibrational spectrum

| # | mode | symmetry | wave number<br>cm**(-1) | IR intensity<br>km/mol | selection rules |       |
|---|------|----------|-------------------------|------------------------|-----------------|-------|
| # |      |          |                         |                        | IR              | RAMAN |
|   | 1    |          | -0.00                   | 0.00000                | -               | -     |
|   | 2    |          | -0.00                   | 0.00000                | -               | -     |
|   | 3    |          | -0.00                   | 0.00000                | -               | -     |
|   | 4    |          | -0.00                   | 0.00000                | -               | -     |
|   | 5    |          | 0.00                    | 0.00000                | -               | -     |
|   | 6    |          | 0.00                    | 0.00000                | -               | -     |
|   | 7    | a        | 12.14                   | 0.00088                | YES             | YES   |
|   | 8    | a        | 14.29                   | 0.00166                | YES             | YES   |
|   | 9    | a        | 15.82                   | 0.00035                | YES             | YES   |
|   | 10   | a        | 18.84                   | 0.00147                | YES             | YES   |
|   | 11   | a        | 28.46                   | 0.06613                | YES             | YES   |
|   | 12   | a        | 28.97                   | 0.02162                | YES             | YES   |
|   | 13   | a        | 34.00                   | 0.01822                | YES             | YES   |
|   | 14   | a        | 35.78                   | 0.01486                | YES             | YES   |
|   | 15   | a        | 36.96                   | 0.08264                | YES             | YES   |
|   | 16   | a        | 41.35                   | 0.05066                | YES             | YES   |
|   | 17   | a        | 44.17                   | 0.05300                | YES             | YES   |
|   | 18   | a        | 55.79                   | 0.00469                | YES             | YES   |
|   | 19   | a        | 58.87                   | 0.00450                | YES             | YES   |
|   | 20   | a        | 67.30                   | 0.11202                | YES             | YES   |
|   | 21   | a        | 69.15                   | 0.22878                | YES             | YES   |
|   | 22   | a        | 71.34                   | 0.16263                | YES             | YES   |
|   | 23   | a        | 72.82                   | 0.13599                | YES             | YES   |

|    |   |        |          |     |     |
|----|---|--------|----------|-----|-----|
| 24 | a | 74.95  | 0.00725  | YES | YES |
| 25 | a | 76.06  | 0.04382  | YES | YES |
| 26 | a | 76.33  | 0.08430  | YES | YES |
| 27 | a | 78.77  | 0.02043  | YES | YES |
| 28 | a | 79.34  | 0.03030  | YES | YES |
| 29 | a | 83.51  | 0.06965  | YES | YES |
| 30 | a | 84.65  | 0.03538  | YES | YES |
| 31 | a | 86.28  | 0.00412  | YES | YES |
| 32 | a | 88.48  | 0.05023  | YES | YES |
| 33 | a | 94.11  | 0.81131  | YES | YES |
| 34 | a | 95.20  | 0.63727  | YES | YES |
| 35 | a | 96.36  | 0.92782  | YES | YES |
| 36 | a | 110.00 | 0.00732  | YES | YES |
| 37 | a | 154.87 | 0.06074  | YES | YES |
| 38 | a | 155.27 | 0.07315  | YES | YES |
| 39 | a | 158.98 | 0.25295  | YES | YES |
| 40 | a | 159.68 | 0.01893  | YES | YES |
| 41 | a | 161.32 | 0.61641  | YES | YES |
| 42 | a | 161.86 | 0.62425  | YES | YES |
| 43 | a | 163.23 | 0.06244  | YES | YES |
| 44 | a | 164.35 | 0.70335  | YES | YES |
| 45 | a | 191.66 | 3.40987  | YES | YES |
| 46 | a | 193.21 | 2.74368  | YES | YES |
| 47 | a | 193.47 | 2.56120  | YES | YES |
| 48 | a | 215.42 | 0.00775  | YES | YES |
| 49 | a | 257.85 | 0.66938  | YES | YES |
| 50 | a | 258.32 | 0.59175  | YES | YES |
| 51 | a | 265.91 | 3.10218  | YES | YES |
| 52 | a | 267.02 | 0.01450  | YES | YES |
| 53 | a | 271.45 | 2.72323  | YES | YES |
| 54 | a | 271.69 | 2.71180  | YES | YES |
| 55 | a | 274.24 | 3.01085  | YES | YES |
| 56 | a | 275.82 | 0.02677  | YES | YES |
| 57 | a | 278.41 | 0.04230  | YES | YES |
| 58 | a | 278.67 | 0.03023  | YES | YES |
| 59 | a | 278.98 | 0.03524  | YES | YES |
| 60 | a | 279.30 | 0.01240  | YES | YES |
| 61 | a | 296.20 | 8.44749  | YES | YES |
| 62 | a | 296.83 | 7.21009  | YES | YES |
| 63 | a | 297.10 | 7.33376  | YES | YES |
| 64 | a | 302.12 | 0.00409  | YES | YES |
| 65 | a | 305.81 | 0.05641  | YES | YES |
| 66 | a | 306.09 | 0.05818  | YES | YES |
| 67 | a | 310.76 | 0.22834  | YES | YES |
| 68 | a | 311.77 | 0.02555  | YES | YES |
| 69 | a | 314.22 | 1.77185  | YES | YES |
| 70 | a | 314.44 | 1.78833  | YES | YES |
| 71 | a | 316.43 | 2.02678  | YES | YES |
| 72 | a | 319.06 | 0.10187  | YES | YES |
| 73 | a | 336.70 | 0.74181  | YES | YES |
| 74 | a | 336.89 | 0.86631  | YES | YES |
| 75 | a | 342.79 | 2.89438  | YES | YES |
| 76 | a | 349.85 | 8.37095  | YES | YES |
| 77 | a | 350.15 | 10.01561 | YES | YES |
| 78 | a | 351.47 | 2.32253  | YES | YES |
| 79 | a | 366.31 | 32.74171 | YES | YES |
| 80 | a | 377.70 | 0.25755  | YES | YES |
| 81 | a | 424.78 | 51.11989 | YES | YES |

|     |   |         |           |     |     |
|-----|---|---------|-----------|-----|-----|
| 82  | a | 435.92  | 60.82615  | YES | YES |
| 83  | a | 437.33  | 58.54028  | YES | YES |
| 84  | a | 504.36  | 0.05727   | YES | YES |
| 85  | a | 508.29  | 1.29690   | YES | YES |
| 86  | a | 508.46  | 3.10185   | YES | YES |
| 87  | a | 508.64  | 1.30362   | YES | YES |
| 88  | a | 509.12  | 1.07345   | YES | YES |
| 89  | a | 509.52  | 2.02030   | YES | YES |
| 90  | a | 509.85  | 4.82870   | YES | YES |
| 91  | a | 509.95  | 7.94918   | YES | YES |
| 92  | a | 510.17  | 7.26728   | YES | YES |
| 93  | a | 514.60  | 2.66144   | YES | YES |
| 94  | a | 515.31  | 1.94413   | YES | YES |
| 95  | a | 515.38  | 1.75398   | YES | YES |
| 96  | a | 518.41  | 0.01329   | YES | YES |
| 97  | a | 533.64  | 22.23075  | YES | YES |
| 98  | a | 539.02  | 20.82454  | YES | YES |
| 99  | a | 539.14  | 20.13014  | YES | YES |
| 100 | a | 543.22  | 0.15474   | YES | YES |
| 101 | a | 543.34  | 0.24194   | YES | YES |
| 102 | a | 543.60  | 0.23582   | YES | YES |
| 103 | a | 543.79  | 0.36454   | YES | YES |
| 104 | a | 544.63  | 0.45707   | YES | YES |
| 105 | a | 545.53  | 3.08530   | YES | YES |
| 106 | a | 547.11  | 13.52608  | YES | YES |
| 107 | a | 547.51  | 14.58518  | YES | YES |
| 108 | a | 694.41  | 1.51306   | YES | YES |
| 109 | a | 694.60  | 1.28448   | YES | YES |
| 110 | a | 695.16  | 0.28264   | YES | YES |
| 111 | a | 695.38  | 0.53084   | YES | YES |
| 112 | a | 696.19  | 9.41710   | YES | YES |
| 113 | a | 696.95  | 74.73584  | YES | YES |
| 114 | a | 697.29  | 73.94284  | YES | YES |
| 115 | a | 697.49  | 72.54285  | YES | YES |
| 116 | a | 711.64  | 0.00563   | YES | YES |
| 117 | a | 721.86  | 2.65177   | YES | YES |
| 118 | a | 723.22  | 4.59454   | YES | YES |
| 119 | a | 723.37  | 4.39762   | YES | YES |
| 120 | a | 760.70  | 0.02067   | YES | YES |
| 121 | a | 796.28  | 8.50174   | YES | YES |
| 122 | a | 805.97  | 16.93403  | YES | YES |
| 123 | a | 807.32  | 16.95684  | YES | YES |
| 124 | a | 924.57  | 15.70989  | YES | YES |
| 125 | a | 924.78  | 12.93731  | YES | YES |
| 126 | a | 928.60  | 4.89130   | YES | YES |
| 127 | a | 929.48  | 0.81151   | YES | YES |
| 128 | a | 932.47  | 246.83697 | YES | YES |
| 129 | a | 933.23  | 115.68420 | YES | YES |
| 130 | a | 935.71  | 322.19670 | YES | YES |
| 131 | a | 935.92  | 311.33576 | YES | YES |
| 132 | a | 1054.63 | 11.82460  | YES | YES |
| 133 | a | 1055.80 | 11.65854  | YES | YES |
| 134 | a | 1057.35 | 10.69399  | YES | YES |
| 135 | a | 1064.00 | 0.10254   | YES | YES |
| 136 | a | 1074.06 | 1.98165   | YES | YES |
| 137 | a | 1074.54 | 0.43994   | YES | YES |
| 138 | a | 1076.33 | 4.14625   | YES | YES |
| 139 | a | 1079.23 | 4.78011   | YES | YES |

|     |   |         |            |     |     |
|-----|---|---------|------------|-----|-----|
| 140 | a | 1079.35 | 24.17992   | YES | YES |
| 141 | a | 1083.37 | 27.41318   | YES | YES |
| 142 | a | 1084.13 | 17.77077   | YES | YES |
| 143 | a | 1085.24 | 17.79678   | YES | YES |
| 144 | a | 1140.03 | 7.05863    | YES | YES |
| 145 | a | 1142.66 | 6.34285    | YES | YES |
| 146 | a | 1143.57 | 9.34849    | YES | YES |
| 147 | a | 1148.55 | 1.80739    | YES | YES |
| 148 | a | 1150.79 | 8.49246    | YES | YES |
| 149 | a | 1156.06 | 15.55514   | YES | YES |
| 150 | a | 1157.07 | 10.46109   | YES | YES |
| 151 | a | 1159.34 | 95.26427   | YES | YES |
| 152 | a | 1168.07 | 1279.96386 | YES | YES |
| 153 | a | 1168.29 | 1311.61166 | YES | YES |
| 154 | a | 1169.47 | 1193.81607 | YES | YES |
| 155 | a | 1182.24 | 1.80195    | YES | YES |
| 156 | a | 1183.46 | 90.36447   | YES | YES |
| 157 | a | 1185.04 | 31.52730   | YES | YES |
| 158 | a | 1186.04 | 65.71882   | YES | YES |
| 159 | a | 1187.64 | 97.98562   | YES | YES |
| 160 | a | 1188.29 | 166.07991  | YES | YES |
| 161 | a | 1190.44 | 63.67834   | YES | YES |
| 162 | a | 1200.16 | 130.54824  | YES | YES |
| 163 | a | 1202.35 | 122.59652  | YES | YES |
| 164 | a | 1207.59 | 980.05079  | YES | YES |
| 165 | a | 1209.64 | 912.69425  | YES | YES |
| 166 | a | 1210.71 | 750.25926  | YES | YES |
| 167 | a | 1217.14 | 14.11441   | YES | YES |
| 168 | a | 1295.98 | 250.06913  | YES | YES |
| 169 | a | 1296.76 | 276.44271  | YES | YES |
| 170 | a | 1298.92 | 289.83931  | YES | YES |
| 171 | a | 1324.06 | 2.10289    | YES | YES |

§end

## 8.15 PhF

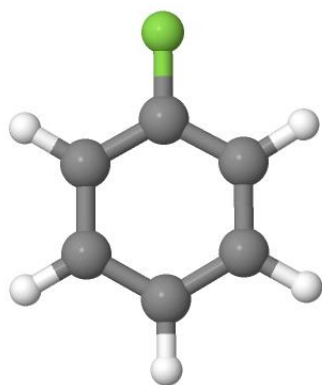

Method: (RI-)BP86(D3BJ)/def2-TZVPP

Symmetry: c2v

Cartesian coordinates in Ångström:

|   |           |           |           |
|---|-----------|-----------|-----------|
| H | 2.1550632 | 0.0000000 | 1.2618747 |
| C | 1.2092915 | 0.0000000 | 0.7205303 |
| C | 0.0000000 | 0.0000000 | 1.4208330 |
| H | 0.0000000 | 0.0000000 | 2.5100281 |

```

C   -1.2092915   0.0000000   0.7205303
H   -2.1550632   0.0000000   1.2618747
C   -1.2191887   0.0000000  -0.6766508
H   -2.1478755   0.0000000  -1.2448060
C    0.0000000   0.0000000  -1.3466493
F    0.0000000   0.0000000  -2.7061020
C    1.2191887   0.0000000  -0.6766508
H    2.1478755   0.0000000  -1.2448060

```

SCF energy GEOOPT = -331.6471322766 H

ZPE = 235.5 kJ/mol

FREEH energy = 249.35 kJ/mol

FREEH entropy = 0.30410 kJ/mol/K

\$vibrational spectrum

| #  | mode | symmetry | wave number<br>cm**(-1) | IR intensity<br>km/mol | selection rules |       |
|----|------|----------|-------------------------|------------------------|-----------------|-------|
| #  |      |          |                         |                        | IR              | RAMAN |
| 1  |      |          | -0.00                   | 0.00000                | -               | -     |
| 2  |      |          | -0.00                   | 0.00000                | -               | -     |
| 3  |      |          | 0.00                    | 0.00000                | -               | -     |
| 4  |      |          | 0.00                    | 0.00000                | -               | -     |
| 5  |      |          | 0.00                    | 0.00000                | -               | -     |
| 6  |      |          | 0.00                    | 0.00000                | -               | -     |
| 7  |      | b2       | 227.78                  | 0.02731                | YES             | YES   |
| 8  |      | b1       | 394.37                  | 1.70227                | YES             | YES   |
| 9  |      | a2       | 409.06                  | 0.00000                | NO              | YES   |
| 10 |      | b2       | 492.59                  | 11.19990               | YES             | YES   |
| 11 |      | a1       | 510.47                  | 5.06549                | YES             | YES   |
| 12 |      | b1       | 608.44                  | 0.18950                | YES             | YES   |
| 13 |      | b2       | 675.13                  | 18.01899               | YES             | YES   |
| 14 |      | b2       | 740.97                  | 66.85254               | YES             | YES   |
| 15 |      | a2       | 800.87                  | 0.00000                | NO              | YES   |
| 16 |      | a1       | 803.96                  | 26.02790               | YES             | YES   |
| 17 |      | b2       | 874.72                  | 6.55297                | YES             | YES   |
| 18 |      | a2       | 936.73                  | 0.00000                | NO              | YES   |
| 19 |      | b2       | 951.26                  | 0.01524                | YES             | YES   |
| 20 |      | a1       | 996.74                  | 0.00012                | YES             | YES   |
| 21 |      | a1       | 1015.01                 | 3.64079                | YES             | YES   |
| 22 |      | b1       | 1063.10                 | 7.70053                | YES             | YES   |
| 23 |      | a1       | 1142.79                 | 14.87880               | YES             | YES   |
| 24 |      | b1       | 1148.10                 | 0.14934                | YES             | YES   |
| 25 |      | a1       | 1212.06                 | 97.62504               | YES             | YES   |
| 26 |      | b1       | 1289.26                 | 0.69731                | YES             | YES   |
| 27 |      | b1       | 1344.13                 | 0.04402                | YES             | YES   |
| 28 |      | b1       | 1446.64                 | 0.91505                | YES             | YES   |
| 29 |      | a1       | 1481.31                 | 77.77814               | YES             | YES   |
| 30 |      | a1       | 1589.40                 | 44.56221               | YES             | YES   |
| 31 |      | b1       | 1598.61                 | 8.72901                | YES             | YES   |
| 32 |      | a1       | 3104.24                 | 0.25624                | YES             | YES   |
| 33 |      | b1       | 3112.53                 | 8.93415                | YES             | YES   |
| 34 |      | a1       | 3125.56                 | 16.17536               | YES             | YES   |
| 35 |      | b1       | 3134.09                 | 5.06139                | YES             | YES   |
| 36 |      | a1       | 3136.13                 | 0.20040                | YES             | YES   |

\$end

## 8.16 CDP<sup>Ph</sup>

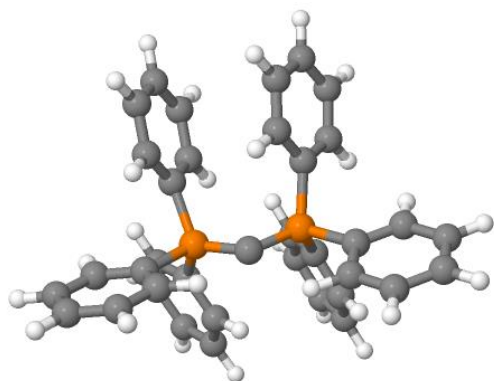

Method: (RI-)BP86(D3BJ)/def2-TZVPP  
Symmetry: c2

Cartesian coordinates in Ångström:

|   |            |            |            |
|---|------------|------------|------------|
| C | -0.0000000 | 0.0000000  | -1.2845151 |
| H | 1.4378052  | 2.3163827  | 3.7284984  |
| C | 1.8327294  | 2.2402925  | 2.7155876  |
| H | 2.8265857  | 4.1573753  | 2.7839835  |
| C | 2.6092731  | 3.2732827  | 2.1848596  |
| C | 1.5490605  | 1.1140035  | 1.9452835  |
| H | 0.9422275  | 0.3134022  | 2.3646917  |
| H | 1.4841389  | 0.0067769  | -3.3160907 |
| C | 3.1015575  | 3.1698040  | 0.8811947  |
| C | 2.0350825  | 1.0009197  | 0.6332260  |
| H | 3.7101206  | 3.9713988  | 0.4617504  |
| P | 1.4188982  | -0.3148103 | -0.4859529 |
| C | 2.8151782  | 2.0429640  | 0.1093735  |
| C | 2.4995698  | -0.2881613 | -3.0440149 |
| H | 0.0068515  | -2.7411490 | -0.7910781 |
| H | 3.3038250  | -0.2436440 | -5.0464134 |
| C | 0.6264086  | -2.8956233 | 0.0926613  |
| C | 3.5140871  | -0.4309289 | -3.9930705 |
| C | 2.7682213  | -0.5272809 | -1.6928450 |
| C | 1.4640444  | -1.8526387 | 0.5148020  |
| H | 3.1914939  | 1.9716417  | -0.9113226 |
| C | 0.5658910  | -4.0856794 | 0.8137702  |
| H | -0.0994654 | -4.8837179 | 0.4854066  |
| C | 2.2509471  | -2.0240215 | 1.6618019  |
| C | 4.7969550  | -0.8146887 | -3.5930449 |
| C | 1.3395803  | -4.2460201 | 1.9671049  |
| C | 4.0534000  | -0.9169036 | -1.2930756 |
| H | 2.9056488  | -1.2209153 | 1.9993615  |
| C | 2.1840879  | -3.2161188 | 2.3874715  |
| C | 5.0657918  | -1.0590012 | -2.2422162 |
| H | 5.5888939  | -0.9276370 | -4.3338486 |
| H | 1.2822865  | -5.1721117 | 2.5394370  |
| H | 4.2618714  | -1.1119341 | -0.2405921 |
| H | 2.7909131  | -3.3382926 | 3.2851559  |
| H | 6.0650235  | -1.3633547 | -1.9302561 |
| H | -3.3038250 | 0.2436440  | -5.0464134 |
| C | -3.5140871 | 0.4309289  | -3.9930705 |
| H | -5.5888939 | 0.9276370  | -4.3338486 |
| C | -4.7969550 | 0.8146887  | -3.5930449 |
| C | -2.4995698 | 0.2881613  | -3.0440149 |

|   |            |            |            |
|---|------------|------------|------------|
| H | -1.4841389 | -0.0067769 | -3.3160907 |
| H | -0.0068515 | 2.7411490  | -0.7910781 |
| C | -5.0657918 | 1.0590012  | -2.2422162 |
| C | -2.7682213 | 0.5272809  | -1.6928450 |
| H | -6.0650235 | 1.3633547  | -1.9302561 |
| P | -1.4188982 | 0.3148103  | -0.4859529 |
| C | -4.0534000 | 0.9169036  | -1.2930756 |
| C | -0.6264086 | 2.8956233  | 0.0926613  |
| H | -0.9422275 | -0.3134022 | 2.3646917  |
| H | 0.0994654  | 4.8837179  | 0.4854066  |
| C | -1.5490605 | -1.1140035 | 1.9452835  |
| C | -0.5658910 | 4.0856794  | 0.8137702  |
| C | -1.4640444 | 1.8526387  | 0.5148020  |
| C | -2.0350825 | -1.0009197 | 0.6332260  |
| H | -4.2618714 | 1.1119341  | -0.2405921 |
| C | -1.8327294 | -2.2402925 | 2.7155876  |
| H | -1.4378052 | -2.3163827 | 3.7284984  |
| C | -2.8151782 | -2.0429640 | 0.1093735  |
| C | -1.3395803 | 4.2460201  | 1.9671049  |
| C | -2.6092731 | -3.2732827 | 2.1848596  |
| C | -2.2509471 | 2.0240215  | 1.6618019  |
| H | -3.1914939 | -1.9716417 | -0.9113226 |
| C | -3.1015575 | -3.1698040 | 0.8811947  |
| C | -2.1840879 | 3.2161188  | 2.3874715  |
| H | -1.2822865 | 5.1721117  | 2.5394370  |
| H | -2.8265857 | -4.1573753 | 2.7839835  |
| H | -2.9056488 | 1.2209153  | 1.9993615  |
| H | -3.7101206 | -3.9713988 | 0.4617504  |
| H | -2.7909131 | 3.3382926  | 3.2851559  |

SCF energy GEOOPT = -2111.522037860 H

ZPE = 1417. kJ/mol

FREEH energy = 1507.49 kJ/mol

FREEH entropy = 0.90772 kJ/mol/K

\$vibrational spectrum

| # | mode | symmetry | wave number<br>cm**(-1) | IR intensity<br>km/mol | selection rules |       |
|---|------|----------|-------------------------|------------------------|-----------------|-------|
| # |      |          |                         |                        | IR              | RAMAN |
|   | 1    |          | -0.00                   | 0.00000                | -               | -     |
|   | 2    |          | -0.00                   | 0.00000                | -               | -     |
|   | 3    |          | -0.00                   | 0.00000                | -               | -     |
|   | 4    |          | 0.00                    | 0.00000                | -               | -     |
|   | 5    |          | 0.00                    | 0.00000                | -               | -     |
|   | 6    |          | 0.00                    | 0.00000                | -               | -     |
|   | 7    | a        | 23.03                   | 0.01194                | YES             | YES   |
|   | 8    | b        | 28.34                   | 0.25692                | YES             | YES   |
|   | 9    | a        | 29.09                   | 0.01488                | YES             | YES   |
|   | 10   | b        | 31.38                   | 0.09554                | YES             | YES   |
|   | 11   | a        | 32.88                   | 0.00130                | YES             | YES   |
|   | 12   | a        | 42.68                   | 0.01457                | YES             | YES   |
|   | 13   | b        | 45.18                   | 0.00723                | YES             | YES   |
|   | 14   | b        | 51.92                   | 0.33214                | YES             | YES   |
|   | 15   | a        | 53.23                   | 0.12158                | YES             | YES   |
|   | 16   | b        | 58.29                   | 0.36006                | YES             | YES   |
|   | 17   | a        | 66.80                   | 0.17357                | YES             | YES   |
|   | 18   | a        | 72.64                   | 0.00238                | YES             | YES   |
|   | 19   | b        | 82.57                   | 0.10670                | YES             | YES   |
|   | 20   | a        | 89.75                   | 0.08660                | YES             | YES   |



|    |   |        |           |     |     |
|----|---|--------|-----------|-----|-----|
| 21 | b | 91.02  | 0.10866   | YES | YES |
| 22 | a | 107.54 | 0.04628   | YES | YES |
| 23 | b | 109.36 | 0.97672   | YES | YES |
| 24 | a | 159.89 | 1.82641   | YES | YES |
| 25 | b | 177.15 | 1.25739   | YES | YES |
| 26 | a | 181.70 | 0.14719   | YES | YES |
| 27 | b | 187.09 | 4.63233   | YES | YES |
| 28 | a | 218.48 | 0.03496   | YES | YES |
| 29 | b | 221.88 | 10.26079  | YES | YES |
| 30 | a | 223.26 | 0.09264   | YES | YES |
| 31 | a | 235.55 | 0.02779   | YES | YES |
| 32 | b | 236.35 | 1.20471   | YES | YES |
| 33 | b | 245.53 | 0.00735   | YES | YES |
| 34 | a | 251.87 | 0.00000   | YES | YES |
| 35 | b | 269.53 | 1.02469   | YES | YES |
| 36 | a | 273.50 | 0.24055   | YES | YES |
| 37 | b | 322.34 | 12.01865  | YES | YES |
| 38 | a | 364.50 | 2.31060   | YES | YES |
| 39 | b | 383.13 | 0.65425   | YES | YES |
| 40 | b | 384.52 | 23.06388  | YES | YES |
| 41 | a | 390.07 | 0.10107   | YES | YES |
| 42 | b | 393.20 | 0.71241   | YES | YES |
| 43 | a | 394.81 | 0.15948   | YES | YES |
| 44 | a | 399.54 | 0.00181   | YES | YES |
| 45 | b | 401.44 | 0.07449   | YES | YES |
| 46 | a | 433.50 | 0.08630   | YES | YES |
| 47 | b | 437.51 | 13.55983  | YES | YES |
| 48 | a | 444.81 | 7.97506   | YES | YES |
| 49 | b | 461.61 | 4.92701   | YES | YES |
| 50 | a | 482.55 | 5.76319   | YES | YES |
| 51 | b | 495.32 | 144.48181 | YES | YES |
| 52 | b | 510.80 | 12.54283  | YES | YES |
| 53 | a | 514.38 | 3.51633   | YES | YES |
| 54 | b | 519.01 | 174.63754 | YES | YES |
| 55 | a | 528.03 | 61.85231  | YES | YES |
| 56 | a | 613.55 | 0.28333   | YES | YES |
| 57 | b | 613.89 | 0.14165   | YES | YES |
| 58 | b | 614.37 | 0.26262   | YES | YES |
| 59 | a | 614.85 | 1.07521   | YES | YES |
| 60 | b | 614.99 | 0.05465   | YES | YES |
| 61 | a | 617.20 | 0.00894   | YES | YES |
| 62 | a | 661.95 | 3.26111   | YES | YES |
| 63 | b | 678.37 | 0.27812   | YES | YES |
| 64 | b | 686.35 | 109.52537 | YES | YES |
| 65 | a | 689.66 | 0.08553   | YES | YES |
| 66 | b | 690.70 | 55.93183  | YES | YES |
| 67 | a | 691.34 | 0.26812   | YES | YES |
| 68 | a | 694.96 | 15.74998  | YES | YES |
| 69 | b | 695.43 | 19.48974  | YES | YES |
| 70 | b | 702.43 | 65.36591  | YES | YES |
| 71 | a | 704.71 | 4.40988   | YES | YES |
| 72 | b | 706.71 | 11.71424  | YES | YES |
| 73 | a | 709.62 | 37.27141  | YES | YES |
| 74 | a | 727.40 | 22.99754  | YES | YES |
| 75 | b | 731.14 | 9.60023   | YES | YES |
| 76 | a | 734.16 | 0.40321   | YES | YES |
| 77 | b | 734.49 | 1.94998   | YES | YES |
| 78 | a | 743.10 | 1.50185   | YES | YES |

|     |   |         |          |     |     |
|-----|---|---------|----------|-----|-----|
| 79  | b | 743.81  | 17.75849 | YES | YES |
| 80  | a | 784.16  | 12.97837 | YES | YES |
| 81  | b | 828.27  | 0.83973  | YES | YES |
| 82  | a | 834.67  | 1.96308  | YES | YES |
| 83  | a | 837.44  | 0.24239  | YES | YES |
| 84  | b | 837.81  | 0.12771  | YES | YES |
| 85  | a | 840.74  | 0.11188  | YES | YES |
| 86  | b | 841.48  | 1.25718  | YES | YES |
| 87  | b | 896.24  | 1.60122  | YES | YES |
| 88  | a | 904.91  | 0.60194  | YES | YES |
| 89  | a | 911.32  | 0.09557  | YES | YES |
| 90  | b | 911.84  | 0.03457  | YES | YES |
| 91  | a | 914.63  | 0.83262  | YES | YES |
| 92  | b | 915.30  | 0.22533  | YES | YES |
| 93  | b | 951.07  | 0.04065  | YES | YES |
| 94  | a | 956.51  | 0.13178  | YES | YES |
| 95  | a | 959.20  | 0.03145  | YES | YES |
| 96  | b | 959.36  | 0.17863  | YES | YES |
| 97  | b | 962.46  | 0.09701  | YES | YES |
| 98  | a | 962.65  | 0.00364  | YES | YES |
| 99  | b | 967.66  | 0.05125  | YES | YES |
| 100 | a | 969.82  | 0.31041  | YES | YES |
| 101 | a | 975.69  | 0.07655  | YES | YES |
| 102 | b | 975.88  | 0.02479  | YES | YES |
| 103 | a | 976.16  | 0.15476  | YES | YES |
| 104 | b | 976.62  | 0.23293  | YES | YES |
| 105 | b | 995.94  | 0.23198  | YES | YES |
| 106 | a | 996.84  | 0.14440  | YES | YES |
| 107 | b | 996.85  | 0.32796  | YES | YES |
| 108 | b | 997.86  | 1.99701  | YES | YES |
| 109 | a | 998.25  | 0.31133  | YES | YES |
| 110 | a | 1001.93 | 0.00817  | YES | YES |
| 111 | b | 1023.27 | 18.81445 | YES | YES |
| 112 | a | 1024.04 | 7.41992  | YES | YES |
| 113 | b | 1024.72 | 0.64479  | YES | YES |
| 114 | a | 1025.13 | 0.00463  | YES | YES |
| 115 | b | 1025.54 | 7.00935  | YES | YES |
| 116 | a | 1026.11 | 1.49115  | YES | YES |
| 117 | b | 1064.74 | 3.59333  | YES | YES |
| 118 | a | 1066.13 | 13.93242 | YES | YES |
| 119 | b | 1070.31 | 6.59064  | YES | YES |
| 120 | a | 1072.36 | 4.87473  | YES | YES |
| 121 | b | 1073.73 | 1.86014  | YES | YES |
| 122 | a | 1076.35 | 2.99050  | YES | YES |
| 123 | b | 1084.04 | 0.70058  | YES | YES |
| 124 | a | 1086.75 | 17.39138 | YES | YES |
| 125 | b | 1087.55 | 70.88827 | YES | YES |
| 126 | a | 1088.13 | 0.10071  | YES | YES |
| 127 | b | 1094.84 | 43.59529 | YES | YES |
| 128 | a | 1097.69 | 34.00721 | YES | YES |
| 129 | b | 1148.91 | 1.21008  | YES | YES |
| 130 | a | 1149.37 | 0.01062  | YES | YES |
| 131 | b | 1150.20 | 0.00001  | YES | YES |
| 132 | a | 1150.27 | 0.13706  | YES | YES |
| 133 | b | 1150.27 | 1.18279  | YES | YES |
| 134 | a | 1150.85 | 0.41489  | YES | YES |
| 135 | b | 1163.91 | 26.71504 | YES | YES |
| 136 | a | 1165.61 | 6.42089  | YES | YES |

|     |   |         |           |     |     |
|-----|---|---------|-----------|-----|-----|
| 137 | b | 1169.08 | 26.82390  | YES | YES |
| 138 | a | 1169.65 | 0.18964   | YES | YES |
| 139 | b | 1171.79 | 4.18829   | YES | YES |
| 140 | a | 1175.62 | 0.00018   | YES | YES |
| 141 | b | 1226.48 | 780.22472 | YES | YES |
| 142 | b | 1289.80 | 9.65029   | YES | YES |
| 143 | a | 1290.98 | 2.84290   | YES | YES |
| 144 | b | 1294.47 | 0.77955   | YES | YES |
| 145 | a | 1294.99 | 7.40908   | YES | YES |
| 146 | b | 1299.28 | 0.09790   | YES | YES |
| 147 | a | 1300.54 | 2.78538   | YES | YES |
| 148 | b | 1334.37 | 1.10768   | YES | YES |
| 149 | a | 1335.37 | 0.10619   | YES | YES |
| 150 | a | 1337.71 | 0.65088   | YES | YES |
| 151 | b | 1337.74 | 0.61456   | YES | YES |
| 152 | b | 1339.10 | 0.42082   | YES | YES |
| 153 | a | 1339.61 | 2.65086   | YES | YES |
| 154 | b | 1424.00 | 21.35038  | YES | YES |
| 155 | a | 1425.09 | 2.77886   | YES | YES |
| 156 | b | 1428.94 | 15.22497  | YES | YES |
| 157 | a | 1429.35 | 24.59881  | YES | YES |
| 158 | a | 1429.93 | 3.89885   | YES | YES |
| 159 | b | 1430.01 | 0.26941   | YES | YES |
| 160 | a | 1467.76 | 4.29512   | YES | YES |
| 161 | b | 1467.81 | 6.90588   | YES | YES |
| 162 | b | 1469.16 | 9.22500   | YES | YES |
| 163 | a | 1469.72 | 0.80775   | YES | YES |
| 164 | b | 1470.44 | 17.27181  | YES | YES |
| 165 | a | 1471.50 | 5.72645   | YES | YES |
| 166 | b | 1566.66 | 1.54015   | YES | YES |
| 167 | a | 1567.11 | 0.08947   | YES | YES |
| 168 | b | 1569.72 | 0.05644   | YES | YES |
| 169 | a | 1570.27 | 0.00778   | YES | YES |
| 170 | b | 1571.95 | 0.18733   | YES | YES |
| 171 | a | 1572.42 | 0.54148   | YES | YES |
| 172 | b | 1582.39 | 4.99793   | YES | YES |
| 173 | a | 1583.30 | 0.63168   | YES | YES |
| 174 | b | 1584.10 | 0.68362   | YES | YES |
| 175 | a | 1584.63 | 0.45907   | YES | YES |
| 176 | b | 1585.03 | 0.54955   | YES | YES |
| 177 | a | 1585.65 | 0.00496   | YES | YES |
| 178 | b | 3084.37 | 7.63527   | YES | YES |
| 179 | a | 3085.51 | 2.16178   | YES | YES |
| 180 | a | 3091.97 | 1.44673   | YES | YES |
| 181 | b | 3091.98 | 0.06209   | YES | YES |
| 182 | b | 3093.30 | 1.65842   | YES | YES |
| 183 | a | 3093.36 | 0.23435   | YES | YES |
| 184 | b | 3093.53 | 3.66968   | YES | YES |
| 185 | a | 3093.68 | 2.71289   | YES | YES |
| 186 | b | 3099.58 | 4.90721   | YES | YES |
| 187 | a | 3099.58 | 2.72430   | YES | YES |
| 188 | b | 3100.78 | 1.94687   | YES | YES |
| 189 | a | 3100.93 | 0.25230   | YES | YES |
| 190 | b | 3101.90 | 0.49260   | YES | YES |
| 191 | a | 3102.21 | 0.46799   | YES | YES |
| 192 | b | 3105.81 | 3.65604   | YES | YES |
| 193 | a | 3105.84 | 2.31147   | YES | YES |
| 194 | b | 3109.40 | 2.16655   | YES | YES |

|     |   |         |          |     |     |
|-----|---|---------|----------|-----|-----|
| 195 | a | 3109.70 | 18.09965 | YES | YES |
| 196 | b | 3110.19 | 3.40682  | YES | YES |
| 197 | a | 3110.30 | 39.52619 | YES | YES |
| 198 | a | 3113.32 | 11.65508 | YES | YES |
| 199 | b | 3113.41 | 29.34380 | YES | YES |
| 200 | b | 3117.04 | 28.08564 | YES | YES |
| 201 | a | 3117.64 | 1.61370  | YES | YES |
| 202 | b | 3120.22 | 54.10523 | YES | YES |
| 203 | a | 3120.35 | 25.83635 | YES | YES |
| 204 | b | 3121.83 | 51.69647 | YES | YES |
| 205 | a | 3121.85 | 2.15543  | YES | YES |
| 206 | b | 3124.67 | 9.81077  | YES | YES |
| 207 | a | 3124.88 | 21.38266 | YES | YES |

\$end

## 9 References

- [1] I. Krossing, A. Reisinger, *Coord. Chem. Rev.* **2006**, *250*, 2721.
- [2] I. Krossing, *Chem. Eur. J.* **2001**, *7*, 490.
- [3] A. Higelin, U. Sachs, S. Keller, I. Krossing, *Chem. Eur. J.* **2012**, *18*, 10029.
- [4] J. M. Slattery, A. Higelin, T. Bayer, I. Krossing, *Angew. Chem. Int. Ed.* **2010**, *49*, 3228.
- [5] J. Cosier, A. M. Glazer, *J. Appl. Crystallogr.* **1986**, *19*, 105.
- [6] a) L. Krause, R. Herbst-Irmer, G. M. Sheldrick, D. Stalke, *J. Appl. Crystallogr.* **2015**, *48*, 3; b) Bruker, *SADABS*, 2016/2, Bruker AXS Inc., Madison, Wisconsin, USA; c) Bruker, *SAINT*, V8.40A, Bruker AXS Inc., Madison, Wisconsin, USA.
- [7] a) G. M. Sheldrick, *Acta Cryst. A* **2015**, *71*, 3; b) G. M. Sheldrick, *Acta Cryst. C* **2015**, *71*, 3.
- [8] C. B. Hübschle, G. M. Sheldrick, B. Dittrich, *J. Appl. Crystallogr.* **2011**, *44*, 1281.
- [9] a) D. Kratzert, J. J. Holstein, I. Krossing, *J. Appl. Crystallogr.* **2015**, *48*, 933; b) D. Kratzert, I. Krossing, *J. Appl. Crystallogr.* **2018**, *51*, 928.
- [10] O. V. Dolomanov, L. J. Bourhis, R. J. Gildea, J. A. K. Howard, H. Puschmann, *J. Appl. Crystallogr.* **2009**, *42*, 339.
- [11] C. R. Groom, I. J. Bruno, M. P. Lightfoot, S. C. Ward, *Acta Cryst. B* **2016**, *72*, 171.
- [12] D. Kratzert, *FinalCif*, V66, <https://www.xs3.uni-freiburg.de/research/finalcif>.
- [13] a) N. J. R. van Eikema Hommes, T. Clark, *J. Mol. Model.* **2005**, *11*, 175; b) G. R. Fulmer, A. J. M. Miller, N. H. Sherden, H. E. Gottlieb, A. Nudelman, B. M. Stoltz, J. E. Bercaw, K. I. Goldberg, *Organometallics* **2010**, *29*, 2176.
- [14] R. K. Harris, E. D. Becker, S. M. Cabral de Menezes, R. Goodfellow, P. Granger, *Magn. Reson. Chem.* **2002**, *40*, 489.
- [15] K. L. Vikse, M. P. Woods, J. S. McIndoe, *Organometallics* **2010**, *29*, 6615.
- [16] O. Treutler, R. Ahlrichs, *J. Chem. Phys.* **1995**, *102*, 346.
- [17] a) R. Ahlrichs, M. Bär, M. Häser, H. Horn, C. Kölmel, *Chem. Phys. Lett.* **1989**, *162*, 165; b) M. von Arnim, R. Ahlrichs, *J. Comput. Chem.* **1998**, *19*, 1746.
- [18] F. Weigend, *Phys. Chem. Chem. Phys.* **2006**, *8*, 1057.
- [19] a) M. Sierka, A. Hogekamp, R. Ahlrichs, *J. Chem. Phys.* **2003**, *118*, 9136; b) R. Ahlrichs, *Phys. Chem. Chem. Phys.* **2004**, *6*, 5119.
- [20] a) S. Grimme, J. Antony, S. Ehrlich, H. Krieg, *J. Chem. Phys.* **2010**, *132*, 154104; b) S. Grimme, S. Ehrlich, L. Goerigk, *J. Comput. Chem.* **2011**, *32*, 1456.
- [21] a) Becke, *Phys. Rev. A* **1988**, *38*, 3098; b) Perdew, *Phys. Rev. B* **1986**, *33*, 8822; c) J. P. Perdew, *Phys. Rev. B* **1986**, *34*, 7406.
- [22] F. Weigend, R. Ahlrichs, *Phys. Chem. Chem. Phys.* **2005**, *7*, 3297.
- [23] S. Grimme, J. G. Brandenburg, C. Bannwarth, A. Hansen, *J. Chem. Phys.* **2015**, *143*, 54107.
- [24] P. Deglmann, F. Furche, R. Ahlrichs, *Chem. Phys. Lett.* **2002**, *362*, 511.
- [25] A. Klamt, G. Schüürmann, *J. Chem. Soc., Perkin Trans. 2* **1993**, 799.
- [26] W. M. Haynes, D. R. Lide, T. J. Bruno (Eds.) *CRC handbook of chemistry and physics. A ready-reference book of chemical and physical data : 2012-2013*, CRC Press, Boca Raton (Fla.), London, New York, **2012**.
- [27] J. Feldman, S. J. McLain, A. Parthasarathy, W. J. Marshall, J. C. Calabrese, S. D. Arthur, *Organometallics* **1997**, *16*, 1514.
- [28] M. Gruber, W. Bauer, H. Maid, K. Schöll, R. R. Tykwinski, *Inorg. Chim. Acta* **2017**, *468*, 152.
- [29] C. Prancevicius, D. A. Iovan, D. W. Stephan, *Dalton Trans.* **2016**, *45*, 16820.
- [30] G. E. Hardy, J. I. Zink, W. C. Kaska, J. C. Baldwin, *J. Am. Chem. Soc.* **1978**, *100*, 8001.
- [31] P. J. Quinlivan, G. Parkin, *Inorg. Chem.* **2017**, *56*, 5493.

- [32] S. Böttger, M. Gruber, J. E. Münzer, G. M. Bernard, N.-J. H. Kneusels, C. Poggel, M. Klein, F. Hampel, B. Neumüller, J. Sundermeyer et al., *Inorg. Chem.* **2020**, *59*, 12054.
- [33] W. Petz, F. Öxler, B. Neumüller, *J. Organomet. Chem.* **2009**, *694*, 4094.
- [34] S. T. Haubrich, P. P. Power, *J. Am. Chem. Soc.* **1998**, *120*, 2202.
- [35] R. J. Wright, A. D. Phillips, N. J. Hardman, P. P. Power, *J. Am. Chem. Soc.* **2002**, *124*, 8538.
- [36] W. Uhl, R. Graupner, M. Layh, U. Schütz, *J. Organomet. Chem.* **1995**, *493*, C1-C5.
- [37] a) M. A. Petrie, P. P. Power, H. V. R. Dias, K. Ruhlandt-Senge, K. M. Waggoner, R. J. Wehmschulte, *Organometallics* **1993**, *12*, 1086; b) S. Schulz, S. Pusch, E. Pohl, S. Dielkus, R. Herbst-Irmer, A. Meller, H. W. Roesky, *Inorg. Chem.* **1993**, *32*, 3343.
- [38] a) H. Rahbarnoohi, M. J. Heeg, J. P. Oliver, *Organometallics* **1994**, *13*, 2123; b) A. H. Cowley, H. S. Isom, A. Decken, *Organometallics* **1995**, *14*, 2589.
- [39] G. H. Robinson, X.-W. Li, W. T. Pennington, *J. Organomet. Chem.* **1995**, *501*, 399.
- [40] X.-W. Li, G. H. Robinson, W. T. Pennington, *Main Group Chem.* **1996**, *1*, 301.
- [41] M. Niemeyer, P. P. Power, *Angew. Chem. Int. Ed.* **1998**, *37*, 1277.
- [42] A. Bondi, *J. Phys. Chem.* **1964**, *68*, 441.
- [43] a) J. K. D. Surette, L. Green, R. D. Singer, *Chem. Commun.* **1996**, 2753; b) J. D. Holbrey, W. M. Reichert, M. Nieuwenhuyzen, O. Sheppard, C. Hardacre, R. D. Rogers, *Chem. Commun.* **2003**, 476; c) J. F. B. Pereira, L. A. Flores, H. Wang, R. D. Rogers, *Chem. Eur. J.* **2014**, *20*, 15482.
- [44] a) M. Alcarazo, C. Gomez, S. Holle, R. Goddard, *Angew. Chem. Int. Ed.* **2010**, *49*, 5788; b) M. Alcarazo, C. Gomez, S. Holle, R. Goddard, *Angew. Chem. Int. Ed.* **2010**, *49*, 5597; c) S. Khan, M. Alcarazo, *Topics in current chemistry* **2013**, *334*, 157.
- [45] a) R. Tonner, G. Heydenrych, G. Frenking, *ChemPhysChem* **2008**, *9*, 1474; b) W. Petz, C. Kutschera, S. Tschan, F. Weller, B. Neumüller, *Z. Anorg. Allg. Chem.* **2003**, *629*, 1235; c) W. Petz, K. Dehnicke, B. Neumüller, *Z. Anorg. Allg. Chem.* **2011**, *637*, 1761.
- [46] N. D. Jones, R. G. Cavell, *J. Organomet. Chem.* **2005**, *690*, 5485.
- [47] K. Kubo, N. D. Jones, M. J. Ferguson, R. McDonald, R. G. Cavell, *J. Am. Chem. Soc.* **2005**, *127*, 5314.
- [48] W. Petz, C. Kutschera, B. Neumüller, *Organometallics* **2005**, *24*, 5038.
- [49] J. E. Münzer, N.-J. H. Kneusels, B. Weinert, B. Neumüller, I. Kuzu, *Dalton Trans.* **2019**, *48*, 11076.
- [50] M. Holz, H. Weingartner, *J. Magn. Reson.* **1991**, *92*, 115.
- [51] a) H. D. B. Jenkins, H. K. Roobottom, J. Passmore, L. Glasser, *Inorg. Chem.* **1999**, *38*, 3609; b) P. J. Malinowski, T. Jaroń, M. Domańska, J. M. Slattery, M. Schmitt, I. Krossing, *Dalton Trans.* **2020**, *49*, 7766.
- [52] I. Raabe, K. Wagner, K. Guttsche, M. Wang, M. Grätzel, G. Santiso-Quiñones, I. Krossing, *Chem. Eur. J.* **2009**, *15*, 1966.
- [53] J. Bohnenberger, W. Feuerstein, D. Himmel, M. Daub, F. Breher, I. Krossing, *Nat. Commun.* **2019**, *10*, 624.
- [54] M. Schmitt, M. Mayländer, J. Goost, S. Richert, I. Krossing, *Angew. Chem. Int. Ed.* **2021**, *60*, 14800.
- [55] a) A. Michalak, M. Mitoraj, T. Ziegler, *J. Phys. Chem. A* **2008**, *112*, 1933; b) M. P. Mitoraj, A. Michalak, T. Ziegler, *J. Chem. Theory Comput.* **2009**, *5*, 962; c) L. Zhao, M. von Hopffgarten, D. M. Andrada, G. Frenking, *WIREs Comput. Mol. Sci.* **2018**, *8*; d) L. Zhao, M. Hermann, W. H. E. Schwarz, G. Frenking, *Nat. Rev. Chem.* **2019**, *3*, 48.
- [56] a) V. Jonas, G. Frenking, M. T. Reetz, *J. Am. Chem. Soc.* **1994**, *116*, 8741; b) R. Tonner, G. Frenking, *Chem. Eur. J.* **2008**, *14*, 3260; c) M. A. Dvorak, R. S. Ford, R. D. Suenram, F. J. Lovas, K. R. Leopold, *J. Am. Chem. Soc.* **1992**, *114*, 108; d) W. A. Burns, K. R. Leopold, *J. Am. Chem. Soc.* **1993**, *115*, 11622.
- [57] M. S. Hill, P. B. Hitchcock, R. Pongtavornpinyo, *Angew. Chem. Int. Ed.* **2005**, *44*, 4231.
